# Supplementary material for: An efficient approach for the synthesis of 1,2-dihydroxanthones enabled by one-pot Claisen condensation/cyclization reactions
Source: Royal Society of Chemistry journal article supplement (doi:10.1039/d1ob00470k), 2021-01-01

# Supporting Information for

## An Efficient Approach for the Synthesis of 1,2-Dihydroxanthones Enabled by One-pot Claisen Condensation/Cyclization Reactions

Huaimo Wu, Song Liu, Youyi Wang, Man Yuan, Hong Zhang, Hua Zhou, Lianbo Xiao, Changwu Zheng and Hongxi Xu

### Contents

|                                                                                            |    |
|--------------------------------------------------------------------------------------------|----|
| General Information.....                                                                   | 2  |
| General procedure for the synthesis of trifluoroethyl salicylates .....                    | 2  |
| General procedure for the one-pot synthesis of 1,2-dihydroxanthones .....                  | 2  |
| Characterization data for the products .....                                               | 3  |
| Procedures for the transformation of <b>3a</b> .....                                       | 18 |
| References.....                                                                            | 20 |
| <sup>1</sup> H NMR, <sup>13</sup> C NMR and <sup>19</sup> F NMR for the new compounds..... | 21 |

## General Information

All glassware was dried with a hot air gun and all reactions were carried out under an atmosphere of dry N<sub>2</sub> unless otherwise stated. All reagents and dry solvents were used as received from the supplier. Organic solutions were concentrated under reduced pressure on a rotary evaporator or an oil pump. Reactions were monitored through thin layer chromatography (TLC) on silica gel-precoated aluminum plates. Compounds were visualized by use of UV light, 2.5% phosphomolybdic acid in ethanol or vanillin with acetic and sulfuric acid in ethanol or potassium permanganate in sodium hydroxide aqueous solution with heating. Anhydrous sodium sulfate was used for drying solutions. <sup>1</sup>H and <sup>13</sup>C NMR were performed on Bruker AV-400, AV-600 or Agilent 400 NMR spectrometers in CDCl<sub>3</sub>, CD<sub>3</sub>OD or DMSO-*d*<sub>6</sub>. Chemical shifts ( $\delta$ ) are quoted in ppm, coupling constants (*J*) in Hz. All spectra are calibrated based on the solvent peak used unless otherwise stated. The following abbreviations apply: (br) broad, (s) singlet, (d) doublet, (t) triplet, (q) quartet and (m) multiplet. Mass spectrometry was performed on a SYNAPT G2-Si HDMS (Waters Corp., Manchester, UK). A Waters 2535 series machine equipped with an Xbridge C<sub>18</sub> column (4.6 × 250 mm, 5 mm) was used for HPLC analysis, and a preparative Xbridge Prep C<sub>18</sub> OBD column (19 × 250 mm, 5 mm) was used for the sample preparation. Flash column chromatography was performed using silica gel (300-400 mesh).

## General procedure for the synthesis of trifluoroethyl salicylates

A mixture of salicylic acids (10.0 mmol), CF<sub>3</sub>CH<sub>2</sub>OH (10.0 mL) were placed in a 50mL round-bottomed flask equipped with a magnetic stirrer. Then thionyl chloride (7.0 eq.) was added to the flask. The mixture was stirred under reflux for 6h. The progress was monitored by TLC. After the reaction, the mixture was concentrated to remove CF<sub>3</sub>CH<sub>2</sub>OH and thionylchloride, which was purified by column to give the desired products in good yields.

## General procedure for the one-pot synthesis of 1,2-dihydroxanthones

To a dried Schlenk tube under N<sub>2</sub> were added trifluoroethyl salicylates **1** (0.25 mmol) and cyclohexenones **2** (0.30 mmol, 1.2 equiv.). To the above mixture at room temperature, LiHMDS (1.0 M in THF or solid, 0.75 mmol, 3.0 equiv) was added in one-portion. The mixture was then stirred vigorously for 3-5 minutes, which was then quenched by addition of 1.0 mL of water. The suspension was kept stirring overnight and monitored by TLC until completion. The aqueous phase was extracted with EtOAc (2 x 5 mL) and the combined organic phases was dried over MgSO<sub>4</sub>, filtered and the solvent removed in vacuo to give a crude product. The following column chromatography using EtOAc/petroleum ether to give the product **3** mostly as a solid.

## Characterization data for the products

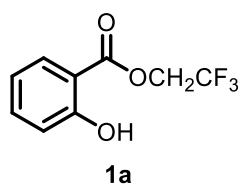

White solid, 76% yield. m.p. = 44 °C.

$^1\text{H}$  NMR (600 MHz, Chloroform-*d*)  $\delta$  10.28 (s, 1H), 7.91 (dd,  $J$  = 8.1, 1.8 Hz, 1H), 7.53 (ddd,  $J$  = 8.7, 7.2, 1.8 Hz, 1H), 7.04 (dd,  $J$  = 8.4, 1.1 Hz, 1H), 6.95 (ddd,  $J$  = 8.2, 7.1, 1.2 Hz, 1H), 4.74 (q,  $J$  = 8.3 Hz, 2H).

$^{13}\text{C}$  NMR (151 MHz, Chloroform-*d*)  $\delta$  168.3, 162.0, 136.7, 130.1, 122.9 (q,  $J$  = 277.3 Hz), 119.6, 117.8, 111.0, 60.7 (q,  $J$  = 37.3, 36.9 Hz).

$^{19}\text{F}$  NMR (565 MHz,  $\text{CDCl}_3$ )  $\delta$  -73.7.

HRESIMS calcd for  $\text{C}_9\text{H}_6\text{F}_3\text{O}_3$  [ $\text{M} - \text{H}$ ] $^-$  219.0269, found 219.0267.

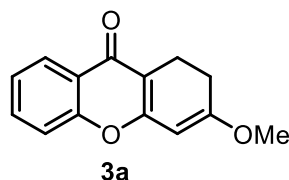

Yellow solid, 98% yield. m.p. = 132 °C.

$^1\text{H}$  NMR (600 MHz, Chloroform-*d*)  $\delta$  8.23 (dd,  $J$  = 7.9, 1.8 Hz, 1H), 7.59 (ddd,  $J$  = 8.6, 7.1, 1.7 Hz, 1H), 7.41 – 7.33 (m, 2H), 5.39 (s, 1H), 3.82 (s, 3H), 2.93 (t,  $J$  = 8.9 Hz, 2H), 2.53 (t,  $J$  = 8.9 Hz, 3H).

$^{13}\text{C}$  NMR (151 MHz,  $\text{CDCl}_3$ )  $\delta$  175.5, 170.5, 162.6, 155.6, 132.3, 125.7, 124.5, 124.0, 117.5, 108.8, 91.2, 56.0, 27.3, 18.6.

HRESIMS calcd for  $\text{C}_{14}\text{H}_{13}\text{O}_3$  [ $\text{M} + \text{H}$ ] $^+$  229.0865, found 229.0864.

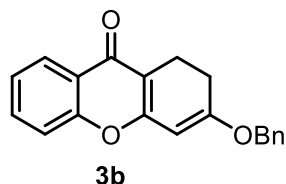

Yellow solid, 92% yield. m.p. = 167 °C.

$^1\text{H}$  NMR (600 MHz, Chloroform-*d*)  $\delta$  8.24 (dd,  $J$  = 7.9, 1.7 Hz, 1H), 7.59 (ddd,  $J$  = 8.5, 7.0, 1.7 Hz, 1H), 7.47 – 7.34 (m, 8H), 5.50 (s, 1H), 5.04 (s, 2H), 2.96 (t,  $J$  = 9.0 Hz, 2H), 2.61 (t,  $J$  = 9.0 Hz, 2H).

$^{13}\text{C}$  NMR (151 MHz,  $\text{CDCl}_3$ )  $\delta$  175.5, 169.3, 162.5, 155.6, 135.2, 132.3, 128.8, 128.6, 127.8, 125.7, 124.5, 124.1, 117.5, 109.0, 92.3, 70.8, 29.7, 27.5, 18.6.

HRESIMS calcd for  $\text{C}_{20}\text{H}_{17}\text{O}_3$  [ $\text{M} + \text{H}$ ] $^+$  305.1178, found 305.1181.

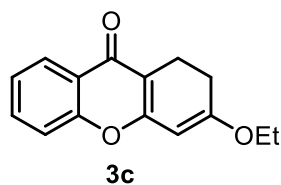

Yellow solid, 95% yield. m.p. = 104 °C.

$^1\text{H}$  NMR (600 MHz, Chloroform-*d*)  $\delta$  8.22 (dd,  $J$  = 7.9, 1.7 Hz, 1H), 7.58 (ddd,  $J$  = 8.6, 7.1, 1.7 Hz, 1H), 7.40 – 7.33 (m, 2H), 5.36 (s, 1H), 4.02 (q,  $J$  = 7.0 Hz, 2H), 2.92 (t,  $J$  = 8.9 Hz, 2H), 2.52 (t,  $J$  = 8.9 Hz,

2H), 1.44 (t,  $J = 7.1$  Hz, 3H).

$^{13}\text{C}$  NMR (101 MHz,  $\text{CDCl}_3$ )  $\delta$  175.5, 169.7, 162.9, 155.5, 132.2, 125.7, 124.4, 124.0, 117.5, 108.7, 91.4, 64.5, 27.5, 18.5, 14.2.

HRESIMS calcd for  $\text{C}_{15}\text{H}_{15}\text{O}_3$   $[\text{M} + \text{H}]^+$  243.1021, found 243.1022.

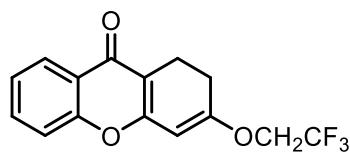

**3d**

White solid, 81% yield. m.p. = 154 °C.

$^1\text{H}$  NMR (600 MHz, Chloroform-*d*)  $\delta$  8.23 (dd,  $J = 7.9, 1.7$  Hz, 1H), 7.61 (ddd,  $J = 8.6, 7.0, 1.7$  Hz, 1H), 7.41 – 7.38 (m, 3H), 5.40 (s, 1H), 4.32 (q,  $J = 7.9$  Hz, 2H), 2.97 (t,  $J = 9.0$  Hz, 2H), 2.62 (t,  $J = 9.0$  Hz, 2H).

$^{13}\text{C}$  NMR (151 MHz, Chloroform-*d*)  $\delta$  175.7, 167.1, 160.8, 155.6, 132.6, 125.8, 124.8, 124.0, 122.6 (q,  $J = 277.3$  Hz), 117.6, 109.8, 93.2, 65.3 (q,  $J = 36.3$  Hz), 26.7, 18.4.

$^{19}\text{F}$  NMR (565 MHz,  $\text{CDCl}_3$ )  $\delta$  -73.5.

HRESIMS calcd for  $\text{C}_{15}\text{H}_{12}\text{F}_3\text{O}_3$   $[\text{M} + \text{H}]^+$  297.0739, found 297.0741.

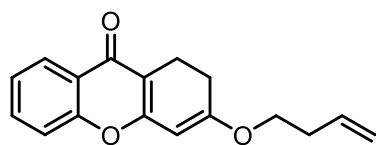

**3e**

Yellow solid, 89% yield. m.p. = 81 °C.

$^1\text{H}$  NMR (600 MHz, Chloroform-*d*)  $\delta$  8.22 (dd,  $J = 7.9, 1.7$  Hz, 1H), 7.58 (ddd,  $J = 8.6, 7.0, 1.7$  Hz, 1H), 7.40 – 7.33 (m, 2H), 5.88 (ddt,  $J = 17.0, 10.2, 6.7$  Hz, 1H), 5.37 (s, 1H), 5.25 – 5.12 (m, 2H), 4.00 (t,  $J = 6.7$  Hz, 2H), 2.92 (t,  $J = 9.0$  Hz, 2H), 2.58 – 2.51 (m, 4H).

$^{13}\text{C}$  NMR (151 MHz,  $\text{CDCl}_3$ )  $\delta$  175.5, 169.6, 162.7, 155.5, 133.7, 132.3, 125.7, 124.5, 124.1, 117.6, 117.5, 108.7, 91.6, 67.9, 33.0, 27.4, 18.5.

HRESIMS calcd for  $\text{C}_{17}\text{H}_{17}\text{O}_3$   $[\text{M} + \text{H}]^+$  269.1178, found 269.1185.

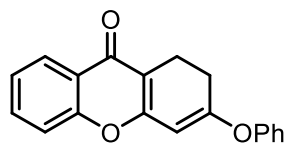

**3f**

Yellow solid, 56% yield. m.p. = 116 °C.

$^1\text{H}$  NMR (600 MHz, Chloroform-*d*)  $\delta$  8.22 (dd,  $J = 8.0, 1.7$  Hz, 1H), 7.56 (ddd,  $J = 8.6, 7.1, 1.7$  Hz, 1H), 7.50 – 7.46 (m, 2H), 7.37 – 7.29 (m, 4H), 7.19 – 7.15 (m, 2H), 5.19 (d,  $J = 1.0$  Hz, 1H), 3.04 (t,  $J = 9.1$  Hz, 2H), 2.80 – 2.75 (m, 2H).

$^{13}\text{C}$  NMR (151 MHz,  $\text{CDCl}_3$ )  $\delta$  175.6, 169.7, 162.0, 155.5, 153.4, 132.4, 130.1, 126.0, 125.7, 124.6, 124.0, 121.4, 117.5, 109.1, 95.7, 26.8, 18.7.

HRESIMS calcd for  $\text{C}_{19}\text{H}_{15}\text{O}_3$   $[\text{M} + \text{H}]^+$  291.1021, found 291.1021.

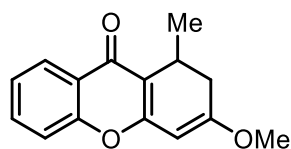

**3g**

Yellow solid, 53% yield. m.p. = 111 °C.

<sup>1</sup>H NMR (600 MHz, Chloroform-*d*) δ 8.23 (dd, *J* = 7.9, 1.6 Hz, 1H), 7.59 (ddd, *J* = 8.6, 7.1, 1.6 Hz, 1H), 7.40 – 7.34 (m, 2H), 5.39 (d, *J* = 2.0 Hz, 1H), 3.83 (s, 3H), 3.49 (p, *J* = 7.4 Hz, 1H), 2.86 (ddd, *J* = 17.0, 8.3, 2.1 Hz, 1H), 2.19 (d, *J* = 17.0 Hz, 1H), 1.14 (d, *J* = 7.0 Hz, 3H).

<sup>13</sup>C NMR (101 MHz, CDCl<sub>3</sub>) δ 175.2, 168.9, 161.8, 155.6, 132.3, 125.7, 124.4, 124.3, 117.5, 114.2, 90.4, 56.0, 34.8, 24.4, 18.1.

HRESIMS calcd for C<sub>15</sub>H<sub>15</sub>O<sub>3</sub> [M + H]<sup>+</sup> 243.1021, found 243.1025.

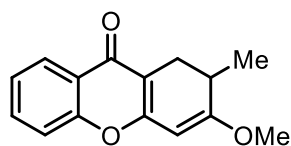

**3h**

Yellow solid, 91% yield. m.p. = 121 °C.

<sup>1</sup>H NMR (400 MHz, Chloroform-*d*) δ 8.22 (dd, *J* = 7.9, 1.7 Hz, 1H), 7.58 (ddd, *J* = 8.6, 7.1, 1.8 Hz, 1H), 7.40 – 7.32 (m, 2H), 5.33 (s, 1H), 3.80 (s, 3H), 2.93 (dd, *J* = 16.4, 7.8 Hz, 1H), 2.78 (dd, *J* = 16.4, 6.2 Hz, 1H), 2.69 – 2.58 (m, 1H), 1.15 (d, *J* = 7.0 Hz, 3H).

<sup>13</sup>C NMR (101 MHz, CDCl<sub>3</sub>) δ 176.0, 174.6, 162.0, 155.5, 132.3, 125.6, 124.5, 124.0, 117.5, 107.7, 90.1, 56.1, 32.6, 26.5, 17.3.

HRESIMS calcd for C<sub>15</sub>H<sub>15</sub>O<sub>3</sub> [M + H]<sup>+</sup> 243.1021, found 243.1020.

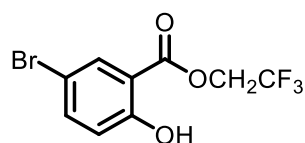

**1aa**

White solid, 72% yield. m.p. = 47 °C.

<sup>1</sup>H NMR (600 MHz, Chloroform-*d*) δ 10.22 (s, 1H), 7.99 (d, *J* = 2.5 Hz, 1H), 7.61 (dd, *J* = 8.9, 2.5 Hz, 1H), 6.94 (d, *J* = 8.9 Hz, 1H), 4.75 (q, *J* = 8.2 Hz, 2H).

<sup>13</sup>C NMR (151 MHz, Chloroform-*d*) δ 167.4, 161.0, 139.6, 132.2, 122.6 (q, *J* = 277.2 Hz), 119.9, 112.4, 111.3, 61.0 (q, *J* = 37.0 Hz).

<sup>19</sup>F NMR (565 MHz, CDCl<sub>3</sub>) δ -73.5.

HRESIMS calcd for C<sub>9</sub>H<sub>7</sub>F<sub>3</sub>BrO<sub>3</sub> [M + H]<sup>+</sup> 298.9531, found 298.9526.

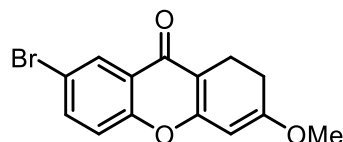

**3aa**

White solid, 74% yield. m.p. = 189 °C.

<sup>1</sup>H NMR (600 MHz, Chloroform-*d*) δ 8.34 (d, *J* = 2.5 Hz, 1H), 7.66 (dd, *J* = 8.8, 2.6 Hz, 1H), 7.27 (s, 1H), 5.37 (s, 1H), 3.82 (s, 3H), 2.91 (t, *J* = 9.0 Hz, 2H), 2.53 (t, *J* = 9.0 Hz, 2H).

$^{13}\text{C}$  NMR (151 MHz,  $\text{CDCl}_3$ )  $\delta$  174.1, 171.0, 163.0, 154.3, 135.2, 128.3, 125.4, 119.4, 117.8, 108.9, 91.0, 56.0, 27.2, 18.5.

HRESIMS calcd for  $\text{C}_{14}\text{H}_{12}\text{BrO}_3$   $[\text{M} + \text{H}]^+$  306.9970, found 306.9973.

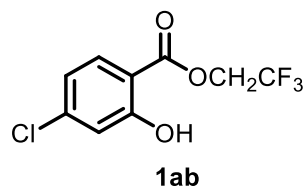

White solid, 91% yield. m.p. = 40 °C.

$^1\text{H}$  NMR (400 MHz, Chloroform-*d*)  $\delta$  10.36 (s, 1H), 7.83 (d,  $J$  = 8.6 Hz, 1H), 7.06 (d,  $J$  = 2.1 Hz, 1H), 6.94 (dd,  $J$  = 8.6, 2.0 Hz, 1H), 4.74 (q,  $J$  = 8.2 Hz, 2H).

$^{13}\text{C}$  NMR (101 MHz, Chloroform-*d*)  $\delta$  167.8, 162.4, 142.8, 131.1, 122.7 (q,  $J$  = 277.3 Hz), 120.4, 118.0, 109.6, 60.9 (q,  $J$  = 37.1 Hz).

$^{19}\text{F}$  NMR (376 MHz,  $\text{CDCl}_3$ )  $\delta$  -73.6.

HRESIMS calcd for  $\text{C}_9\text{H}_5\text{F}_3\text{ClO}_3$   $[\text{M} - \text{H}]^-$  252.9879, found 252.9879.

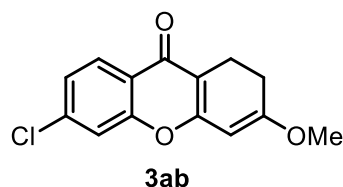

White solid, 58% yield. m.p. = 123 °C.

$^1\text{H}$  NMR (600 MHz, Chloroform-*d*)  $\delta$  8.14 (dd,  $J$  = 8.5, 2.2 Hz, 1H), 7.39 (d,  $J$  = 2.2 Hz, 1H), 7.32 (dt,  $J$  = 8.5, 2.1 Hz, 1H), 5.35 (s, 1H), 3.82 (d,  $J$  = 2.1 Hz, 2H), 2.90 (td,  $J$  = 9.0, 2.2 Hz, 2H), 2.52 (td,  $J$  = 9.0, 2.1 Hz, 2H).

$^{13}\text{C}$  NMR (151 MHz,  $\text{CDCl}_3$ )  $\delta$  174.7, 170.9, 162.9, 155.6, 138.1, 127.0, 125.3, 122.6, 117.5, 109.0, 91.0, 56.0, 27.2, 18.5.

HRESIMS calcd for  $\text{C}_{14}\text{H}_{12}\text{ClO}_3$   $[\text{M} + \text{H}]^+$  263.0475, found 263.0474.

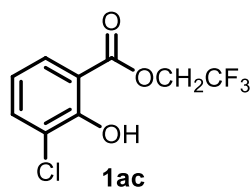

White solid, 82% yield. m.p. = 56 °C.

$^1\text{H}$  NMR (600 MHz, Chloroform-*d*)  $\delta$  10.79 (s, 1H), 7.85 (dd,  $J$  = 8.1, 1.6 Hz, 1H), 7.64 (dd,  $J$  = 7.9, 1.6 Hz, 1H), 6.92 (t,  $J$  = 8.0 Hz, 1H), 4.76 (q,  $J$  = 8.2 Hz, 2H).

$^{13}\text{C}$  NMR (101 MHz, Chloroform-*d*)  $\delta$  168.1, 157.6, 136.9, 128.6, 122.7 (q,  $J$  = 277.3 Hz), 122.6, 119.7, 112.3, 61.1 (q,  $J$  = 37.4 Hz).

$^{19}\text{F}$  NMR (376 MHz,  $\text{CDCl}_3$ )  $\delta$  -73.6.

HRESIMS calcd for  $\text{C}_9\text{H}_5\text{F}_3\text{ClO}_3$   $[\text{M} - \text{H}]^-$  252.9879, found 252.9909.

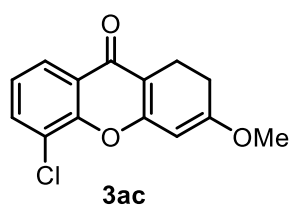

Yellow solid, 42% yield. m.p. = 164 °C.

$^1\text{H}$  NMR (600 MHz, Chloroform-*d*)  $\delta$  8.12 (dd,  $J$  = 7.9, 1.6 Hz, 1H), 7.63 (dd,  $J$  = 7.7, 1.6 Hz, 1H), 7.28 (t,  $J$  = 7.8 Hz, 1H), 5.46 (s, 1H), 3.83 (s, 3H), 2.91 (t,  $J$  = 9.0 Hz, 2H), 2.53 (t,  $J$  = 9.0 Hz, 2H).

$^{13}\text{C}$  NMR (101 MHz,  $\text{CDCl}_3$ )  $\delta$  174.7, 171.0, 162.8, 151.2, 132.6, 125.4, 124.5, 124.3, 122.3, 108.9, 91.1, 56.1, 27.2, 18.5.

HRESIMS calcd for  $\text{C}_{14}\text{H}_{12}\text{ClO}_3$  [ $\text{M} + \text{H}$ ] $^+$  263.0475, found 263.0456.

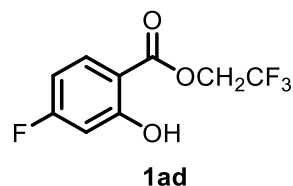

Colorless oil, 89% yield..

$^1\text{H}$  NMR (400 MHz, Chloroform-*d*)  $\delta$  10.49 (d,  $J$  = 1.5 Hz, 1H), 7.96 – 7.89 (m, 1H), 6.76 – 6.62 (m, 2H), 4.74 (q,  $J$  = 8.3 Hz, 2H).

$^{13}\text{C}$  NMR (101 MHz, Chloroform-*d*)  $\delta$  169.2, 167.2 (d,  $J$  = 109.2 Hz), 164.1 (d,  $J$  = 14.4 Hz), 132.4 (d,  $J$  = 11.7 Hz), 122.8 (q,  $J$  = 277.1 Hz), 108.0 (d,  $J$  = 22.8 Hz), 107.7 (d,  $J$  = 2.4 Hz), 104.7 (d,  $J$  = 24.3 Hz), 60.8 (q,  $J$  = 37.1 Hz).

$^{19}\text{F}$  NMR (376 MHz,  $\text{CDCl}_3$ )  $\delta$  -73.7, -99.0.

HRESIMS calcd for  $\text{C}_9\text{H}_5\text{F}_4\text{O}_3$  [ $\text{M} - \text{H}$ ] $^-$  237.0175, found 237.0170.

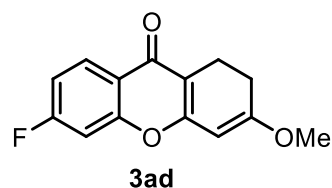

Yellow solid, 73% yield. m.p. = 138 °C.

$^1\text{H}$  NMR (600 MHz, Chloroform-*d*)  $\delta$  8.20 (dd,  $J$  = 8.8, 6.4 Hz, 1H), 7.08 – 7.03 (m, 2H), 5.34 (s, 1H), 3.79 (s, 3H), 2.88 (t,  $J$  = 9.0 Hz, 2H), 2.50 (t,  $J$  = 9.0 Hz, 2H).

$^{13}\text{C}$  NMR (101 MHz, Chloroform-*d*)  $\delta$  174.7, 170.6, 165.7, 164.0, 163.0, 156.4 (d,  $J$  = 12.1 Hz), 128.0 (d,  $J$  = 10.7 Hz), 120.9 (d,  $J$  = 2.2 Hz), 113.1 (d,  $J$  = 22.7 Hz), 108.7, 104.2 (d,  $J$  = 25.0 Hz), 91.0, 56.0, 27.2, 18.4.

$^{19}\text{F}$  NMR (376 MHz,  $\text{CDCl}_3$ )  $\delta$  -105.5.

HRESIMS calcd for  $\text{C}_{14}\text{H}_{12}\text{FO}_3$  [ $\text{M} + \text{H}$ ] $^+$  247.0770, found 247.0772.

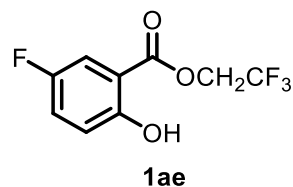

White solid, 88% yield. m.p. = 53 °C.

$^1\text{H}$  NMR (600 MHz, Chloroform-*d*)  $\delta$  10.04 (s, 1H), 7.57 (dd,  $J$  = 8.5, 3.2 Hz, 1H), 7.32 – 7.25 (m, 1H), 7.01 (dd,  $J$  = 9.2, 4.4 Hz, 1H), 4.75 (q,  $J$  = 8.2 Hz, 2H).

$^{13}\text{C}$  NMR (151 MHz, Chloroform-*d*)  $\delta$  167.6 (d,  $J$  = 3.1 Hz), 158.3, 155.2 (d,  $J$  = 239.8 Hz), 124.5 (d,  $J$  = 23.4 Hz), 122.7 (q,  $J$  = 277.3 Hz), 119.3 (d,  $J$  = 6.8 Hz), 115.1 (d,  $J$  = 24.2 Hz), 110.8 (d,  $J$  = 7.7 Hz), 61.0 (q,  $J$  = 37.3 Hz).

$^{19}\text{F}$  NMR (565 MHz,  $\text{CDCl}_3$ )  $\delta$  -73.6, -123.3.

HRESIMS calcd for C<sub>9</sub>H<sub>5</sub>F<sub>4</sub>O<sub>3</sub> [M - H]<sup>-</sup> 237.0175, found 237.0176.

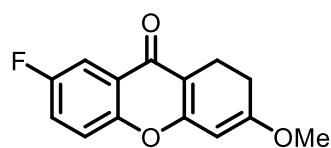

**3ae**

Yellow solid, 83% yield. m.p. = 136 °C.

<sup>1</sup>H NMR (600 MHz, Chloroform-*d*) δ 7.86 (dd, *J* = 8.5, 3.1 Hz, 1H), 7.38 (dd, *J* = 9.1, 4.2 Hz, 1H), 7.32 – 7.29 (m, 1H), 5.38 (s, 1H), 3.82 (s, 3H), 2.92 (t, *J* = 8.9 Hz, 2H), 2.53 (t, *J* = 8.9 Hz, 3H).

<sup>13</sup>C NMR (151 MHz, Chloroform-*d*) δ 174.7 (d, *J* = 1.9 Hz), 171.0, 163.1, 159.3 (d, *J* = 245.4 Hz), 151.7, 125.2 (d, *J* = 6.9 Hz), 120.3 (d, *J* = 26.1 Hz), 119.4 (d, *J* = 8.6 Hz), 110.6 (d, *J* = 23.2 Hz), 108.3, 91.1, 56.0, 27.2, 18.5.

<sup>19</sup>F NMR (565 MHz, CDCl<sub>3</sub>) δ -116.5.

HRESIMS calcd for C<sub>14</sub>H<sub>12</sub>FO<sub>3</sub> [M + H]<sup>+</sup> 247.0770, found 247.0771.

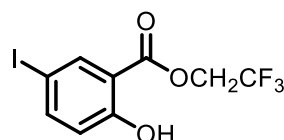

**1af**

White solid, 90% yield. m.p. = 60 °C.

<sup>1</sup>H NMR (600 MHz, Chloroform-*d*) δ 10.24 (s, 1H), 8.16 (d, *J* = 2.4 Hz, 1H), 7.77 (dd, *J* = 8.8, 2.2 Hz, 1H), 6.82 (d, *J* = 8.7 Hz, 1H), 4.75 (q, *J* = 8.2 Hz, 2H).

<sup>13</sup>C NMR (101 MHz, Chloroform-*d*) δ 167.2, 161.6, 145.2, 138.2, 122.6 (q, *J* = 277.3 Hz), 120.2, 113.1, 80.5, 61.0 (q, *J* = 37.4 Hz).

<sup>19</sup>F NMR (376 MHz, CDCl<sub>3</sub>) δ -73.4.

HRESIMS calcd for C<sub>9</sub>H<sub>5</sub>F<sub>3</sub>IO<sub>3</sub> [M + H]<sup>+</sup> 344.9235, found 344.9235.

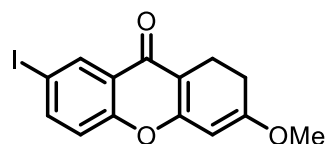

**3af**

White solid, 68% yield. m.p. = 178 °C.

<sup>1</sup>H NMR (600 MHz, Chloroform-*d*) δ 8.52 (d, *J* = 2.2 Hz, 1H), 7.83 (dd, *J* = 8.8, 2.2 Hz, 1H), 7.14 (d, *J* = 8.7 Hz, 1H), 5.36 (s, 1H), 3.82 (s, 3H), 2.90 (t, *J* = 9.0 Hz, 2H), 2.52 (t, *J* = 9.0 Hz, 2H).

<sup>13</sup>C NMR (101 MHz, CDCl<sub>3</sub>) δ 173.9, 171.0, 163.0, 155.0, 140.8, 134.6, 125.7, 119.6, 109.0, 91.0, 88.3, 56.1, 27.2, 18.6.

HRESIMS calcd for C<sub>14</sub>H<sub>12</sub>IO<sub>3</sub> [M + H]<sup>+</sup> 354.9831, found 354.9837.

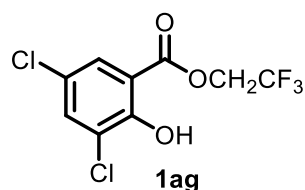

**1ag**

White solid, 87% yield. m.p. = 51 °C.

<sup>1</sup>H NMR (400 MHz, Chloroform-*d*) δ 10.72 (s, 1H), 7.80 (d, *J* = 2.6 Hz, 1H), 7.63 (d, *J* = 2.6 Hz, 1H),



4.77 (q,  $J = 8.1$  Hz, 2H).

$^{13}\text{C}$  NMR (101 MHz, Chloroform-*d*)  $\delta$  167.3, 156.4, 136.5, 127.8, 124.3, 123.8, 122.5 (q,  $J = 277.3$  Hz), 112.7, 61.4 (q,  $J = 37.7$  Hz).

$^{19}\text{F}$  NMR (376 MHz,  $\text{CDCl}_3$ )  $\delta$  -73.5.

HRESIMS calcd for  $\text{C}_9\text{H}_4\text{Cl}_2\text{F}_3\text{O}_3$  [ $\text{M} - \text{H}$ ] $^-$  286.9490, found 286.9493.

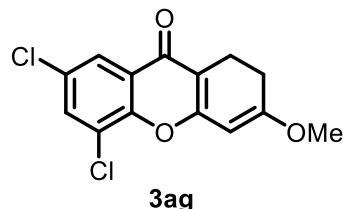

Yellow solid, 41% yield. m.p. = 175 °C.

$^1\text{H}$  NMR (600 MHz, Chloroform-*d*)  $\delta$  8.09 (d,  $J = 2.6$  Hz, 1H), 7.63 (d,  $J = 2.6$  Hz, 1H), 5.46 (s, 1H), 3.85 (s, 4H), 2.91 (t,  $J = 9.0$  Hz, 2H), 2.55 (t,  $J = 9.0$  Hz, 3H).

$^{13}\text{C}$  NMR (101 MHz,  $\text{CDCl}_3$ )  $\delta$  173.5, 171.5, 163.2, 149.8, 132.4, 130.0, 125.9, 123.9, 123.5, 109.0, 91.0, 56.2, 27.2, 18.5.

HRESIMS calcd for  $\text{C}_{14}\text{H}_{11}\text{Cl}_2\text{O}_3$  [ $\text{M} + \text{H}$ ] $^+$  297.0085, found 297.0085.

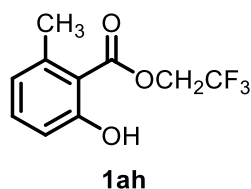

White solid, 90% yield. m.p. = 89 °C.

$^1\text{H}$  NMR (400 MHz, Chloroform-*d*)  $\delta$  10.85 (s, 1H), 7.35 (dd,  $J = 8.4, 7.5$  Hz, 1H), 6.92 – 6.87 (m, 1H), 6.78 (dt,  $J = 7.5, 1.0$  Hz, 1H), 4.75 (q,  $J = 8.3$  Hz, 2H), 2.58 (s, 3H).

$^{13}\text{C}$  NMR (101 MHz, Chloroform-*d*)  $\delta$  170.1, 163.4, 141.7, 135.3, 122.7 (q,  $J = 277.2$  Hz), 123.4, 115.8, 110.9, 61.0 (q,  $J = 36.8$  Hz), 24.0.

$^{19}\text{F}$  NMR (376 MHz,  $\text{CDCl}_3$ )  $\delta$  -73.3.

HRESIMS calcd for  $\text{C}_{10}\text{H}_8\text{F}_3\text{O}_3$  [ $\text{M} - \text{H}$ ] $^-$  233.0426, found 233.0415.

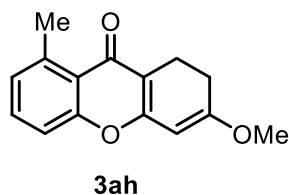

Yellow solid, 56% yield. m.p. = 153 °C.

$^1\text{H}$  NMR (600 MHz, Chloroform-*d*)  $\delta$  7.41 (t,  $J = 7.8$  Hz, 1H), 7.22 (d,  $J = 8.3$  Hz, 1H), 7.08 (d,  $J = 7.4$  Hz, 1H), 5.33 (s, 1H), 3.80 (s, 3H), 2.91 (s, 3H), 2.87 (t,  $J = 9.0$  Hz, 2H), 2.51 (t,  $J = 8.9$  Hz, 2H).

$^{13}\text{C}$  NMR (101 MHz,  $\text{CDCl}_3$ )  $\delta$  177.9, 169.9, 161.0, 157.0, 140.7, 131.3, 127.2, 122.3, 115.7, 109.6, 90.7, 55.9, 27.3, 22.9, 18.6.

HRESIMS calcd for  $\text{C}_{15}\text{H}_{15}\text{O}_3$  [ $\text{M} + \text{H}$ ] $^+$  243.1021, found 243.1021.

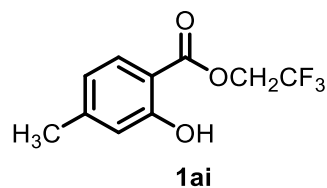

White solid, 92% yield. m.p. = 42 °C.

<sup>1</sup>H NMR (400 MHz, Chloroform-*d*) δ 10.23 (s, 1H), 7.78 (d, *J* = 8.2 Hz, 1H), 6.85 (s, 1H), 6.76 (dd, *J* = 8.2, 1.6 Hz, 1H), 4.72 (q, *J* = 8.3 Hz, 2H), 2.38 (s, 3H).

<sup>13</sup>C NMR (101 MHz, Chloroform-*d*) δ 168.3, 162.0, 148.4, 129.9, 122.9 (q, *J* = 277.3 Hz), 120.9, 117.9, 108.4, 60.6 (q, *J* = 36.8 Hz), 21.9.

<sup>19</sup>F NMR (376 MHz, CDCl<sub>3</sub>) δ -73.6.

HRESIMS calcd for C<sub>10</sub>H<sub>8</sub>F<sub>3</sub>O<sub>2</sub> [M - H]<sup>-</sup> 233.0426, found 233.0423.

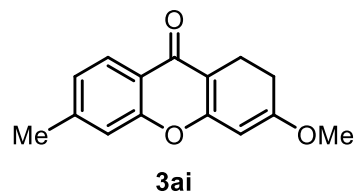

Yellow solid, 73% yield. m.p. = 127 °C.

<sup>1</sup>H NMR (400 MHz, Chloroform-*d*) δ 8.09 (d, *J* = 8.4 Hz, 1H), 7.15 (t, *J* = 3.5 Hz, 2H), 5.34 (s, 1H), 3.79 (s, 3H), 2.90 (t, *J* = 8.9 Hz, 2H), 2.50 (t, *J* = 9.0 Hz, 2H), 2.45 (s, 3H).

<sup>13</sup>C NMR (101 MHz, CDCl<sub>3</sub>) δ 175.6, 170.3, 162.5, 155.7, 143.4, 126.0, 125.4, 121.7, 117.3, 108.6, 91.2, 55.9, 27.3, 21.7, 18.5.

HRESIMS calcd for C<sub>15</sub>H<sub>15</sub>O<sub>3</sub> [M + H]<sup>+</sup> 243.1021, found 243.1023.

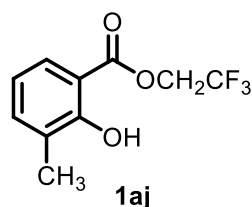

Colorless oil, 91% yield.

<sup>1</sup>H NMR (400 MHz, Chloroform-*d*) δ 10.53 (s, 1H), 7.77 (dd, *J* = 8.0, 1.7 Hz, 1H), 7.40 (ddt, *J* = 7.3, 1.7, 0.8 Hz, 1H), 6.85 (t, *J* = 7.7 Hz, 1H), 4.74 (q, *J* = 8.3 Hz, 2H), 2.30 (s, 3H).

<sup>13</sup>C NMR (101 MHz, Chloroform-*d*) δ 168.8, 160.4, 137.5, 127.6, 127.0, 122.9 (q, *J* = 277.3 Hz), 118.9, 110.2, 60.7 (q, *J* = 37.3 Hz), 15.6.

<sup>19</sup>F NMR (376 MHz, CDCl<sub>3</sub>) δ -73.6.

HRESIMS calcd for C<sub>10</sub>H<sub>8</sub>F<sub>3</sub>O<sub>3</sub> [M - H]<sup>-</sup> 233.0426, found 233.0423.

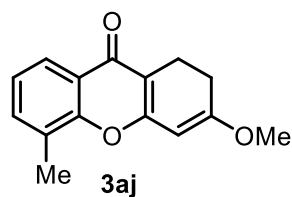

Yellow solid, 85% yield. m.p. = 145 °C.

<sup>1</sup>H NMR (400 MHz, Chloroform-*d*) δ 8.07 (dd, *J* = 8.0, 1.6 Hz, 1H), 7.43 (d, *J* = 6.9 Hz, 1H), 7.25 (t, *J* = 7.6 Hz, 1H), 5.42 (s, 1H), 3.83 (s, 3H), 2.93 (t, *J* = 8.9 Hz, 2H), 2.53 (t, *J* = 9.0 Hz, 2H), 2.49 (s, 3H).

$^{13}\text{C}$  NMR (101 MHz,  $\text{CDCl}_3$ )  $\delta$  175.9, 170.3, 162.3, 154.0, 133.3, 126.7, 124.0, 123.9, 123.3, 108.6, 91.3, 56.0, 27.3, 18.6, 15.6.

HRESIMS calcd for  $\text{C}_{15}\text{H}_{15}\text{O}_3$   $[\text{M} + \text{H}]^+$  243.1021, found 243.1022.

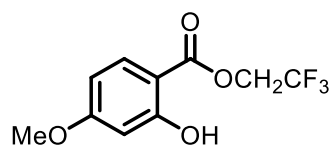

**1ak**

White solid, 94% yield. m.p. = 72 °C.

$^1\text{H}$  NMR (400 MHz, Chloroform-*d*)  $\delta$  10.49 (s, 1H), 7.89 – 7.72 (m, 1H), 6.53 – 6.46 (m, 2H), 4.71 (q,  $J$  = 8.3 Hz, 2H), 3.86 (s, 3H).

$^{13}\text{C}$  NMR (101 MHz, Chloroform-*d*)  $\delta$  168.1, 166.5, 164.3, 131.5, 122.9 (q,  $J$  = 277.3 Hz), 108.2, 103.9, 100.8, 60.5 (q,  $J$  = 37.1 Hz), 55.6.

$^{19}\text{F}$  NMR (376 MHz,  $\text{CDCl}_3$ )  $\delta$  -73.7.

HRESIMS calcd for  $\text{C}_{10}\text{H}_8\text{F}_3\text{O}_4$   $[\text{M} - \text{H}]^-$  249.0375, found 249.0377.

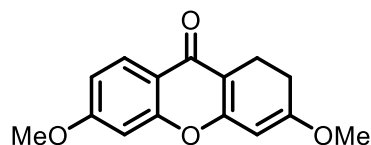

**3ak**

White solid, 53% yield. m.p. = 161 °C.

$^1\text{H}$  NMR (600 MHz, Chloroform-*d*)  $\delta$  8.13 (d,  $J$  = 8.8 Hz, 1H), 6.94 (dd,  $J$  = 8.8, 2.4 Hz, 1H), 6.81 (d,  $J$  = 2.4 Hz, 1H), 5.35 (s, 1H), 3.90 (s, 3H), 3.81 (s, 3H), 2.90 (t,  $J$  = 9.0 Hz, 2H), 2.52 (t,  $J$  = 9.0 Hz, 2H).

$^{13}\text{C}$  NMR (151 MHz,  $\text{CDCl}_3$ )  $\delta$  175.3, 170.0, 163.1, 162.2, 157.1, 127.0, 117.9, 113.3, 108.4, 100.2, 91.1, 77.2, 77.2, 77.0, 76.8, 55.9, 55.7, 27.3, 18.5.

HRESIMS calcd for  $\text{C}_{15}\text{H}_{15}\text{O}_4$   $[\text{M} + \text{H}]^+$  259.0970, found 259.0968.

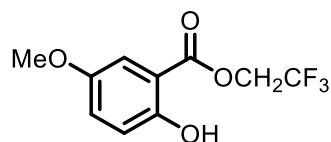

**1al**

White solid, 87% yield. m.p. = 46 °C.

$^1\text{H}$  NMR (400 MHz, Chloroform-*d*)  $\delta$  9.90 (s, 1H), 7.31 (d,  $J$  = 3.1 Hz, 1H), 7.16 (dd,  $J$  = 9.1, 3.1 Hz, 1H), 6.96 (d,  $J$  = 9.1 Hz, 1H), 4.74 (q,  $J$  = 8.3 Hz, 2H), 3.81 (s, 3H).

$^{13}\text{C}$  NMR (101 MHz, Chloroform-*d*)  $\delta$  168.1, 156.5, 152.2, 125.1, 122.8 (q,  $J$  = 277.2 Hz), 118.8, 111.8, 110.4, 60.7 (q,  $J$  = 37.3 Hz), 55.8.

$^{19}\text{F}$  NMR (376 MHz,  $\text{CDCl}_3$ )  $\delta$  -73.6.

HRESIMS calcd for  $\text{C}_{10}\text{H}_8\text{F}_3\text{O}_4$   $[\text{M} - \text{H}]^-$  249.0375, found 249.0373.

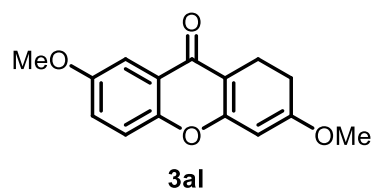

Yellow solid, 86% yield. m.p. = 182 °C.

<sup>1</sup>H NMR (600 MHz, Chloroform-*d*) δ 7.59 (d, *J* = 3.1 Hz, 1H), 7.30 (d, *J* = 9.0 Hz, 1H), 7.16 (dd, *J* = 9.1, 3.1 Hz, 1H), 5.35 (s, 1H), 3.89 (s, 3H), 3.79 (s, 3H), 2.91 (t, *J* = 8.9 Hz, 2H), 2.51 (t, *J* = 8.9 Hz, 2H).  
<sup>13</sup>C NMR (101 MHz, CDCl<sub>3</sub>) δ 175.3, 170.2, 162.5, 156.5, 150.3, 124.5, 122.0, 118.8, 108.2, 105.2, 91.2, 55.9, 55.9, 27.3, 18.6.

HRESIMS calcd for C<sub>15</sub>H<sub>15</sub>O<sub>4</sub> [M + H]<sup>+</sup> 259.0970, found 259.0970.

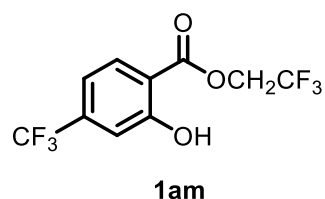

White solid, 86% yield. m.p. = 34 °C.

<sup>1</sup>H NMR (400 MHz, Chloroform-*d*) δ 10.39 (s, 1H), 8.05 – 8.01 (m, 1H), 7.31 (d, *J* = 1.6 Hz, 1H), 7.19 (dd, *J* = 8.3, 1.7 Hz, 1H), 4.78 (q, *J* = 8.2 Hz, 2H).

<sup>13</sup>C NMR (101 MHz, Chloroform-*d*) δ 167.6, 161.8, 137.9 (q, *J* = 33.1 Hz), 131.0, 123.0 (q, *J* = 273.4 Hz), 122.6 (q, *J* = 277.3 Hz), 116.0 (q, *J* = 3.4 Hz), 115.3 (q, *J* = 4.2 Hz), 113.6, 61.1 (q, *J* = 37.4 Hz).

<sup>19</sup>F NMR (376 MHz, CDCl<sub>3</sub>) δ -64.1, -73.6.

HRESIMS calcd for C<sub>10</sub>H<sub>5</sub>F<sub>6</sub>O<sub>3</sub> [M - H]<sup>-</sup> 287.0143, found 287.0145.

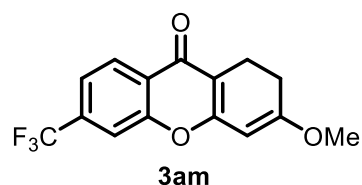

Yellow solid, 73% yield. m.p. = 134 °C.

<sup>1</sup>H NMR (600 MHz, Chloroform-*d*) δ 8.34 (d, *J* = 8.2 Hz, 1H), 7.68 (s, 1H), 7.62 – 7.55 (m, 1H), 5.40 (s, 1H), 3.84 (s, 4H), 2.94 (t, *J* = 9.0 Hz, 2H), 2.56 (t, *J* = 9.0 Hz, 2H).

<sup>13</sup>C NMR (151 MHz, Chloroform-*d*) δ 174.4, 171.4, 163.5, 154.9, 133.9 (q, *J* = 33.2 Hz), 126.9, 126.3, 123.3 (q, *J* = 272.9 Hz), 120.9 (q, *J* = 3.8 Hz), 115.3 (q, *J* = 4.3 Hz), 109.5, 90.9, 56.1, 27.2, 18.5.

<sup>19</sup>F NMR (565 MHz, CDCl<sub>3</sub>) δ -62.9.

HRESIMS calcd for C<sub>15</sub>H<sub>12</sub>F<sub>3</sub>O<sub>2</sub> [M + H]<sup>+</sup> 297.0739, found 297.0741.

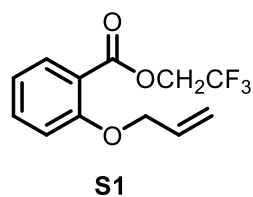

A mixture of **1a** (5 mmol, 1.0 equiv), potassium carbonate (10 mmol, 2.0 equiv), and allyl bromide (6 mmol, 1.2 equiv) in 8 mL of DMF was heated to 80 °C for 2 h. TLC analysis indicated that the reaction

had ceased. After cooling to room temperature, the solution was diluted with EtOAc (50 mL) and washed with water (50 mL  $\times$  2) and brine (50 mL  $\times$  2). The organic layer was dried over Na<sub>2</sub>SO<sub>4</sub>, filtered, and concentrated under reduced pressure. The residue was then purified by flash chromatography on silica gel to give **S1** as colorless oil in 86% yield.

<sup>1</sup>H NMR (600 MHz, Chloroform-*d*)  $\delta$  7.90 (dd,  $J$  = 7.8, 1.8 Hz, 1H), 7.51 (ddd,  $J$  = 8.3, 7.4, 1.8 Hz, 1H), 7.04 – 6.99 (m, 2H), 6.09 (ddt,  $J$  = 17.2, 10.4, 5.1 Hz, 1H), 5.52 (dq,  $J$  = 17.3, 1.7 Hz, 1H), 5.33 (dq,  $J$  = 10.6, 1.5 Hz, 1H), 4.72 – 4.64 (m, 4H).

<sup>13</sup>C NMR (151 MHz, Chloroform-*d*)  $\delta$  164.2, 158.8, 134.5, 132.5, 132.2, 123.3 (q,  $J$  = 277.3 Hz), 120.4, 118.3, 117.8, 113.6, 69.6, 60.6 (q,  $J$  = 36.4 Hz).

<sup>19</sup>F NMR (565 MHz, CDCl<sub>3</sub>)  $\delta$  -73.5.

HRESIMS calcd for C<sub>12</sub>H<sub>12</sub>F<sub>3</sub>O<sub>3</sub> [M + H]<sup>+</sup> 541.4049, found 531.4053.

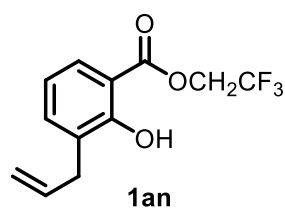

Compound **S1** (1.00 g, 3.85 mmol) was neatly heated at 200 °C for 12 h, which resulted in the crude brownish oil that was purified by flash chromatography to get compound **1an** as pale-yellow oil (0.87 g, 87% yield).

<sup>1</sup>H NMR (600 MHz, Chloroform-*d*)  $\delta$  10.56 (s, 1H), 7.81 (dd,  $J$  = 8.0, 1.7 Hz, 1H), 7.42 (dd,  $J$  = 7.3, 1.6 Hz, 1H), 6.90 (t,  $J$  = 7.7 Hz, 1H), 6.13 – 5.95 (m, 1H), 5.12 (dq,  $J$  = 13.8, 1.9 Hz, 2H), 4.74 (q,  $J$  = 8.3 Hz, 2H), 3.47 (d,  $J$  = 6.6 Hz, 2H).

<sup>13</sup>C NMR (101 MHz, Chloroform-*d*)  $\delta$  168.8, 159.9, 136.9, 135.9, 128.9, 128.1, 122.9 (q,  $J$  = 277.3 Hz), 119.2, 116.1, 110.5, 60.8 (q,  $J$  = 36.9 Hz), 33.6.

<sup>19</sup>F NMR (376 MHz, CDCl<sub>3</sub>)  $\delta$  -73.6.

HRESIMS calcd for C<sub>12</sub>H<sub>10</sub>F<sub>3</sub>O<sub>3</sub> [M - H]<sup>-</sup> 259.0582, found 259.0579.

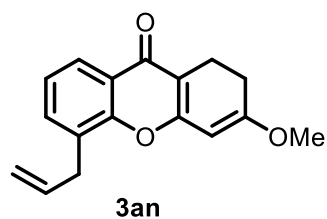

Yellow solid, 88% yield. m.p. = 123 °C.

<sup>1</sup>H NMR (600 MHz, Chloroform-*d*)  $\delta$  8.08 (dd,  $J$  = 7.8, 1.8 Hz, 1H), 7.41 (d,  $J$  = 7.3 Hz, 1H), 7.26 (t,  $J$  = 7.6 Hz, 1H), 6.02 (ddt,  $J$  = 20.0, 9.7, 6.6 Hz, 1H), 5.36 (s, 1H), 5.16 – 5.08 (m, 2H), 3.80 (s, 3H), 3.61 (d,  $J$  = 6.7 Hz, 2H), 2.89 (t,  $J$  = 8.9 Hz, 2H), 2.50 (t,  $J$  = 8.9 Hz, 2H).

<sup>13</sup>C NMR (101 MHz, CDCl<sub>3</sub>)  $\delta$  175.7, 170.4, 162.3, 153.4, 135.6, 132.5, 128.7, 124.1, 124.0, 123.8, 116.6, 108.6, 91.1, 56.0, 33.6, 27.3, 18.5.

HRESIMS calcd for C<sub>17</sub>H<sub>17</sub>O<sub>3</sub> [M + H]<sup>+</sup> 269.1178, found 269.1179.

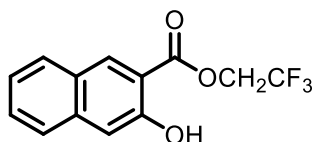

**1ao**

Yellow solid, 83% yield. m.p. = 78 °C.

$^1\text{H}$  NMR (400 MHz, Chloroform-*d*)  $\delta$  9.90 (s, 1H), 8.56 (s, 1H), 7.86 (dd,  $J$  = 8.3, 1.1 Hz, 1H), 7.72 (dd,  $J$  = 8.4, 1.0 Hz, 1H), 7.56 (ddd,  $J$  = 8.2, 6.8, 1.3 Hz, 1H), 7.41 – 7.35 (m, 2H), 4.82 (q,  $J$  = 8.3 Hz, 2H).

$^{13}\text{C}$  NMR (101 MHz, Chloroform-*d*)  $\delta$  168.1, 156.1, 138.4, 133.0, 129.8, 129.4, 127.1, 126.4, 124.3, 122.9 (d,  $J$  = 277.3 Hz), 112.7, 112.1, 61.0 (q,  $J$  = 37.3 Hz).

$^{19}\text{F}$  NMR (376 MHz,  $\text{CDCl}_3$ )  $\delta$  -73.4.

HRESIMS calcd for  $\text{C}_{13}\text{H}_8\text{O}_3\text{F}_3$  [ $\text{M} - \text{H}$ ] 269.0426, found 269.0431.

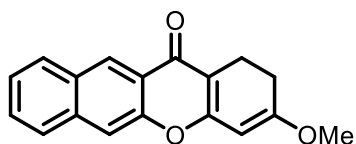

**3ao**

Yellow solid, 78% yield. m.p. = 150 °C.

$^1\text{H}$  NMR (600 MHz, Chloroform-*d*)  $\delta$  8.79 (s, 1H), 8.05 (d,  $J$  = 8.3 Hz, 1H), 7.88 (d,  $J$  = 8.3 Hz, 1H), 7.81 (s, 1H), 7.60 – 7.54 (m, 1H), 7.52 – 7.46 (m, 1H), 5.42 (s, 1H), 3.84 (s, 3H), 2.97 (t,  $J$  = 8.9 Hz, 2H), 2.56 (t,  $J$  = 8.9 Hz, 2H).

$^{13}\text{C}$  NMR (151 MHz,  $\text{CDCl}_3$ )  $\delta$  176.0, 171.2, 163.6, 152.2, 135.2, 130.2, 129.5, 128.1, 127.1, 126.4, 125.5, 123.2, 113.5, 107.3, 91.6, 56.0, 27.4, 18.6.

HRESIMS calcd for  $\text{C}_{18}\text{H}_{15}\text{O}_3$  [ $\text{M} + \text{H}$ ] $^+$  279.1021, found 279.1006.

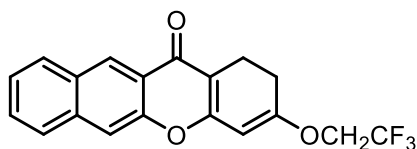

**3i**

Yellow solid, 76% yield. m.p. = 128 °C.

$^1\text{H}$  NMR (600 MHz, Chloroform-*d*)  $\delta$  8.80 (s, 1H), 8.06 (d,  $J$  = 8.2 Hz, 1H), 7.91 (d,  $J$  = 8.3 Hz, 1H), 7.83 (s, 1H), 7.60 (ddd,  $J$  = 8.2, 6.7, 1.2 Hz, 1H), 7.52 (ddd,  $J$  = 8.1, 6.8, 1.3 Hz, 1H), 5.45 (s, 1H), 4.35 (q,  $J$  = 7.8 Hz, 2H), 3.01 (t,  $J$  = 9.1 Hz, 2H), 2.66 (t,  $J$  = 9.1 Hz, 2H).

$^{13}\text{C}$  NMR (151 MHz, Chloroform-*d*)  $\delta$  176.3, 167.7, 161.8, 152.2, 135.3, 130.3, 129.6, 128.3, 127.1, 126.6, 125.7, 123.0, 122.6 (q,  $J$  = 277.3 Hz), 113.7, 108.2, 93.5, 65.4 (q,  $J$  = 36.7 Hz), 26.8, 18.5.

$^{19}\text{F}$  NMR (565 MHz,  $\text{CDCl}_3$ )  $\delta$  -73.4.

HRESIMS calcd for  $\text{C}_{19}\text{H}_{14}\text{F}_3\text{O}_3$  [ $\text{M} + \text{H}$ ] $^+$  347.0895, found 347.0902.

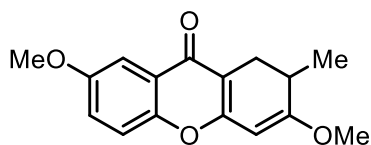

**3j**

Yellow solid, 84% yield. m.p. = 123 °C.

$^1\text{H}$  NMR (400 MHz, Chloroform-*d*)  $\delta$  7.62 (d,  $J$  = 3.1 Hz, 1H), 7.32 (d,  $J$  = 9.1 Hz, 1H), 7.18 (dd,  $J$  = 9.1, 3.1 Hz, 1H), 5.33 (s, 1H), 3.91 (s, 3H), 3.80 (s, 3H), 2.94 (dd,  $J$  = 16.3, 7.8 Hz, 1H), 2.79 (dd,  $J$  = 16.3, 6.2 Hz, 1H), 2.64 (dt,  $J$  = 13.9, 7.0 Hz, 1H), 1.15 (d,  $J$  = 7.0 Hz, 3H).

$^{13}\text{C}$  NMR (151 MHz,  $\text{CDCl}_3$ )  $\delta$  175.8, 174.5, 161.9, 156.5, 150.3, 124.5, 122.1, 118.8, 107.1, 105.2, 90.2, 56.1, 55.9, 32.6, 26.6, 17.3.

HRESIMS calcd for  $\text{C}_{16}\text{H}_{17}\text{O}_4$   $[\text{M} + \text{H}]^+$  273.1127, found 273.1129.

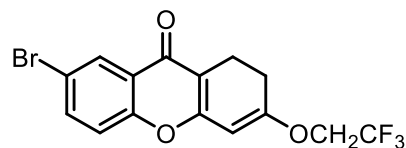

White solid, 53% yield. m.p. = 180 °C.

$^1\text{H}$  NMR (600 MHz, Chloroform-*d*)  $\delta$  8.31 (d,  $J$  = 2.5 Hz, 1H), 7.66 (dd,  $J$  = 8.8, 2.5 Hz, 1H), 7.25 (d,  $J$  = 8.8 Hz, 1H), 5.36 (s, 1H), 4.32 (q,  $J$  = 7.8 Hz, 2H), 2.92 (t,  $J$  = 9.1 Hz, 2H), 2.60 (t,  $J$  = 9.1 Hz, 2H).

$^{13}\text{C}$  NMR (151 MHz, Chloroform-*d*)  $\delta$  174.2, 167.5, 161.2, 154.3, 135.5, 128.3, 125.3, 122.6 (q,  $J$  = 277.6 Hz), 119.5, 118.1, 109.8, 93.0, 65.4 (q,  $J$  = 36.4 Hz), 26.6, 18.4.

$^{19}\text{F}$  NMR (565 MHz,  $\text{CDCl}_3$ )  $\delta$  -73.5.

HRESIMS calcd for  $\text{C}_{15}\text{H}_{11}\text{BrF}_3\text{O}_2$   $[\text{M} + \text{H}]^+$  374.9844, found 374.9846.

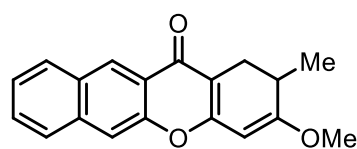

Yellow solid, 86% yield. m.p. = 112 °C.

$^1\text{H}$  NMR (600 MHz, Chloroform-*d*)  $\delta$  8.80 (d,  $J$  = 2.6 Hz, 1H), 8.06 (dd,  $J$  = 8.4, 2.5 Hz, 1H), 7.90 (dd,  $J$  = 8.5, 2.5 Hz, 1H), 7.83 (d,  $J$  = 2.5 Hz, 1H), 7.61 – 7.57 (m, 1H), 7.52 – 7.48 (m, 1H), 5.41 (d,  $J$  = 2.6 Hz, 1H), 3.85 (d,  $J$  = 2.6 Hz, 3H), 3.00 (ddd,  $J$  = 16.2, 7.8, 2.7 Hz, 1H), 2.84 (ddd,  $J$  = 16.2, 6.3, 2.7 Hz, 1H), 2.69 (tt,  $J$  = 7.1, 3.6 Hz, 1H), 1.20 (dd,  $J$  = 7.2, 2.6 Hz, 3H).

$^{13}\text{C}$  NMR (151 MHz,  $\text{CDCl}_3$ )  $\delta$  176.5, 175.4, 163.0, 152.3, 135.2, 130.2, 129.5, 128.1, 127.1, 126.4, 125.5, 123.2, 113.5, 106.2, 90.5, 56.2, 32.8, 26.6, 17.3.

HRESIMS calcd for  $\text{C}_{19}\text{H}_{17}\text{O}_3$   $[\text{M} + \text{H}]^+$  293.1178, found 293.1120.

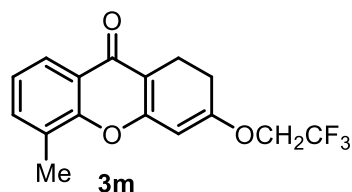

White solid, 57% yield. m.p. = 168 °C.

$^1\text{H}$  NMR (600 MHz, Chloroform-*d*)  $\delta$  8.07 (dd,  $J$  = 7.9, 1.8 Hz, 1H), 7.44 (ddd,  $J$  = 7.2, 1.8, 0.9 Hz, 1H), 7.26 (t,  $J$  = 7.6 Hz, 1H), 5.43 (s, 1H), 4.34 (q,  $J$  = 7.8 Hz, 2H), 2.95 (t,  $J$  = 9.1 Hz, 2H), 2.66 – 2.56 (m, 2H), 2.47 (s, 3H).

$^{13}\text{C}$  NMR (151 MHz, Chloroform-*d*)  $\delta$  176.0, 166.9, 160.6, 154.1, 133.6, 126.8, 124.3, 123.8, 123.4, 122.7 (q,  $J$  = 277.5 Hz), 109.5, 93.2, 65.4 (q,  $J$  = 36.4 Hz), 26.7, 18.4, 15.5.

$^{19}\text{F}$  NMR (565 MHz,  $\text{CDCl}_3$ )  $\delta$  -73.5.

HRESIMS calcd for C<sub>16</sub>H<sub>14</sub>F<sub>3</sub>O<sub>3</sub> [M + H]<sup>+</sup> 311.0895, found 311.0898.

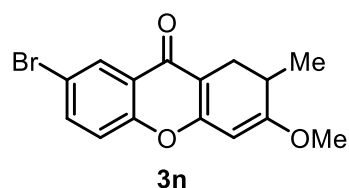

Yellow solid, 58% yield. m.p. = 196 °C.

<sup>1</sup>H NMR (600 MHz, Chloroform-*d*) δ 8.29 (d, *J* = 2.5 Hz, 1H), 7.61 (dd, *J* = 8.8, 2.5 Hz, 1H), 7.23 (d, *J* = 8.8 Hz, 1H), 5.28 (s, 1H), 3.77 (s, 3H), 2.88 (dd, *J* = 16.4, 7.8 Hz, 1H), 2.71 (dd, *J* = 16.4, 6.2 Hz, 1H), 2.61 – 2.58 (m, 1H), 1.12 (d, *J* = 7.0 Hz, 3H).

<sup>13</sup>C NMR (150 MHz, CDCl<sub>3</sub>) δ 175.1, 174.4, 162.3, 154.2, 135.1, 128.2, 125.4, 119.5, 117.7, 107.8, 90.0, 56.2, 32.6, 26.5, 17.3.

HRESIMS calcd for C<sub>15</sub>H<sub>14</sub>BrO<sub>3</sub> [M + H]<sup>+</sup> 321.0126, found 321.0130.

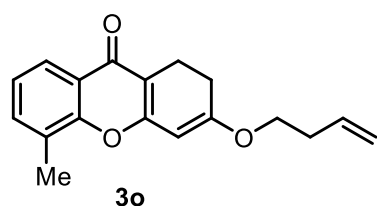

Yellow solid, 72% yield. m.p. = 99 °C.

<sup>1</sup>H NMR (600 MHz, Chloroform-*d*) δ 8.05 (dd, *J* = 8.0, 1.7 Hz, 1H), 7.39 (dt, *J* = 7.2, 1.3 Hz, 1H), 7.22 (t, *J* = 7.6 Hz, 1H), 5.87 (ddt, *J* = 17.0, 10.3, 6.7 Hz, 1H), 5.37 (s, 1H), 5.22 – 5.12 (m, 2H), 4.00 (t, *J* = 6.7 Hz, 2H), 2.90 (t, *J* = 8.9 Hz, 2H), 2.57 – 2.48 (m, 4H), 2.45 (s, 3H).

<sup>13</sup>C NMR (151 MHz, CDCl<sub>3</sub>) δ 175.8, 169.4, 162.4, 154.0, 133.7, 133.2, 126.7, 123.9, 123.8, 123.2, 117.6, 108.5, 91.6, 67.9, 33.0, 27.4, 18.5, 15.6.

HRESIMS calcd for C<sub>18</sub>H<sub>19</sub>O<sub>3</sub> [M + H]<sup>+</sup> 283.1334, found 283.1336.

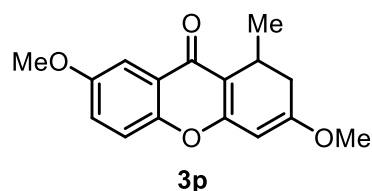

Yellow solid, 76% yield. m.p. = 153 °C.

<sup>1</sup>H NMR (400 MHz, Chloroform-*d*) δ 7.62 (d, *J* = 3.1 Hz, 1H), 7.32 (d, *J* = 9.1 Hz, 1H), 7.18 (dd, *J* = 9.1, 3.1 Hz, 1H), 5.33 (s, 1H), 3.91 (s, 3H), 3.80 (s, 3H), 2.94 (dd, *J* = 16.3, 7.8 Hz, 1H), 2.79 (dd, *J* = 16.3, 6.2 Hz, 1H), 2.64 (dt, *J* = 13.9, 7.0 Hz, 1H), 1.15 (d, *J* = 7.0 Hz, 3H).

<sup>13</sup>C NMR (151 MHz, CDCl<sub>3</sub>) δ 175.8, 174.5, 161.9, 156.5, 150.3, 124.5, 122.1, 118.8, 107.1, 105.2, 90.2, 56.1, 55.9, 32.6, 26.6, 17.3.

HRESIMS calcd for C<sub>16</sub>H<sub>17</sub>O<sub>4</sub> [M + H]<sup>+</sup> 273.1127, found 273.1131.

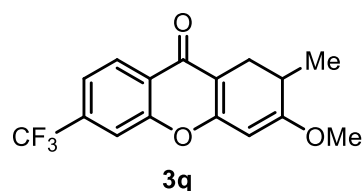

White solid, 59% yield. m.p. = 139 °C.



$^1\text{H}$  NMR (600 MHz, Chloroform-*d*)  $\delta$  8.30 (d,  $J = 8.2$  Hz, 1H), 7.63 (s, 1H), 7.55 (dd,  $J = 8.2, 1.6$  Hz, 1H), 5.32 (s, 1H), 3.80 (s, 3H), 2.91 (dd,  $J = 16.4, 7.8$  Hz, 1H), 2.76 (dd,  $J = 16.4, 6.3$  Hz, 1H), 2.63 (h,  $J = 7.0$  Hz, 1H), 1.14 (d,  $J = 7.1$  Hz, 3H).

$^{13}\text{C}$  NMR (101 MHz, Chloroform-*d*)  $\delta$  175.5, 174.7, 162.8, 154.9, 133.8 (q,  $J = 33.3$  Hz), 126.8, 126.2, 123.3 (q,  $J = 272.8$  Hz), 120.7 (q,  $J = 3.6$  Hz), 115.3 (q,  $J = 4.3$  Hz), 108.3, 89.8, 56.2, 32.6, 26.4, 17.2.

$^{19}\text{F}$  NMR (376 MHz,  $\text{CDCl}_3$ )  $\delta$  -62.9.

HRESIMS calcd for  $\text{C}_{16}\text{H}_{14}\text{F}_3\text{O}_3$   $[\text{M} + \text{H}]^+$  311.0895, found 311.0898.

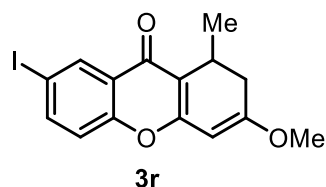

White solid, 63% yield. m.p. = 178 °C.

$^1\text{H}$  NMR (600 MHz, Chloroform-*d*)  $\delta$  8.51 (d,  $J = 2.2$  Hz, 1H), 7.81 (dd,  $J = 8.7, 2.3$  Hz, 1H), 7.12 (d,  $J = 8.7$  Hz, 1H), 5.35 (d,  $J = 2.1$  Hz, 1H), 3.81 (s, 3H), 3.48 – 3.40 (m, 1H), 2.84 (ddd,  $J = 17.2, 8.4, 2.1$  Hz, 1H), 2.18 (dd,  $J = 17.1, 1.2$  Hz, 1H), 1.11 (d,  $J = 7.1$  Hz, 3H).

$^{13}\text{C}$  NMR (101 MHz,  $\text{CDCl}_3$ )  $\delta$  173.5, 169.4, 162.1, 155.0, 140.8, 134.6, 126.0, 119.6, 114.3, 90.2, 88.2, 56.1, 34.7, 24.4, 18.1.

HRESIMS calcd for  $\text{C}_{15}\text{H}_{14}\text{IO}_3$   $[\text{M} + \text{H}]^+$  368.9988, found 368.9993.

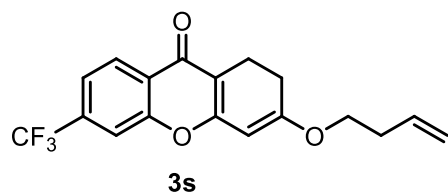

Yellow solid, 71% yield. m.p. = 140 °C.

$^1\text{H}$  NMR (600 MHz, Chloroform-*d*)  $\delta$  8.34 (d,  $J = 8.2$  Hz, 1H), 7.67 (s, 1H), 7.59 (d,  $J = 8.3$  Hz, 1H), 5.93 – 5.84 (m, 1H), 5.38 (s, 1H), 5.24 – 5.14 (m, 2H), 4.05 – 4.01 (m, 2H), 2.93 (td,  $J = 9.0, 1.5$  Hz, 2H), 2.56 (q,  $J = 9.1, 7.6$  Hz, 4H).

$^{13}\text{C}$  NMR (151 MHz, Chloroform-*d*)  $\delta$  174.3, 170.6, 163.6, 154.9, 133.9 (q,  $J = 33.5$  Hz), 133.5, 126.9, 126.3, 123.3 (q,  $J = 273.0$  Hz), 120.8 (q,  $J = 3.4$  Hz), 117.7, 115.3 (q,  $J = 3.9$  Hz), 109.4, 91.3, 68.2, 32.9, 27.3, 18.5.

$^{19}\text{F}$  NMR (565 MHz,  $\text{CDCl}_3$ )  $\delta$  -62.9.

HRESIMS calcd for  $\text{C}_{18}\text{H}_{16}\text{F}_3\text{O}_3$   $[\text{M} + \text{H}]^+$  337.1052, found 337.1051.

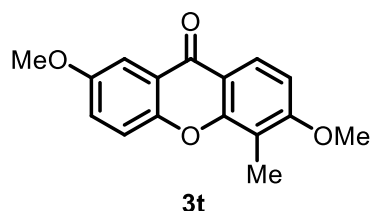

Yellow solid, 83% yield. m.p. = 168 °C.

$^1\text{H}$  NMR (600 MHz, Chloroform-*d*)  $\delta$  8.25 (d,  $J = 8.9$  Hz, 1H), 7.72 (d,  $J = 3.2$  Hz, 1H), 7.47 (d,  $J = 9.1$  Hz, 1H), 7.32 (dd,  $J = 9.0, 3.1$  Hz, 1H), 6.99 (d,  $J = 8.9$  Hz, 1H), 4.00 (s, 3H), 3.94 (s, 3H), 2.40 (s, 3H).

$^{13}\text{C}$  NMR (151 MHz,  $\text{CDCl}_3$ )  $\delta$  176.9, 162.2, 155.8, 155.3, 151.2, 125.4, 124.2, 121.7, 119.2, 115.4, 113.5,

107.4, 105.9, 56.1, 55.9, 8.2.

HRESIMS calcd for C<sub>16</sub>H<sub>15</sub>O<sub>4</sub> [M + H]<sup>+</sup> 271.0970, found 271.0974.

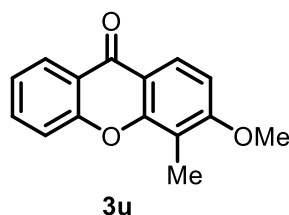

Yellow solid,<sup>1</sup> 78% yield.

<sup>1</sup>H NMR (600 MHz, Chloroform-*d*) δ 8.35 (dd, *J* = 7.9, 1.8 Hz, 1H), 8.25 (dd, *J* = 9.0, 0.7 Hz, 1H), 7.72 (ddd, *J* = 8.6, 7.1, 1.7 Hz, 1H), 7.54 (dd, *J* = 8.5, 1.0 Hz, 1H), 7.38 (ddd, *J* = 8.1, 7.0, 1.1 Hz, 1H), 7.00 (d, *J* = 8.9 Hz, 1H), 4.01 (s, 3H), 2.42 (s, 3H).

### Procedures for the transformation of **3a**

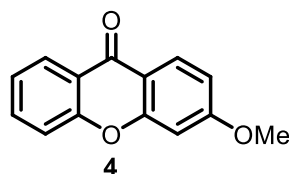

To a solution of **3a** (57 mg, 0.25 mmol) in toluene (2 mL) was added DDQ (68.1 mg, 0.3 mmol), the suspension was heated at reflux for 3 hours. After cooling, the reaction mixture was filtered, Then the filtrate was concentrated by rotary evaporator and the residue was purified by column chromatography on silica gel to afford **2h** in 97% yield as a white solid.<sup>2</sup>

<sup>1</sup>H NMR (600 MHz, Chloroform-*d*) δ 8.33 (dd, *J* = 7.9, 1.7 Hz, 1H), 8.25 (d, *J* = 8.9 Hz, 1H), 7.70 (ddd, *J* = 8.6, 7.1, 1.7 Hz, 1H), 7.46 (dd, *J* = 8.4, 1.1 Hz, 1H), 7.38 (ddd, *J* = 8.0, 7.1, 1.1 Hz, 1H), 6.95 (dd, *J* = 8.9, 2.4 Hz, 1H), 6.89 (d, *J* = 2.4 Hz, 1H), 3.94 (s, 3H).

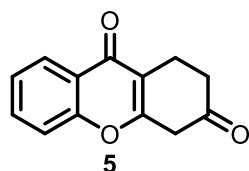

2 mL of HCl (1N) was added to **3a** (57 mg, 0.25 mmol) in a 25 mL of flask. The reaction mixture was heated to 70 °C for 1 h. On cooling, the mixture was extracted with CH<sub>2</sub>Cl<sub>2</sub> (2 x 5 mL). The combined organic phases were washed with an aqueous saturated NaHCO<sub>3</sub> solution (10 mL), dried (MgSO<sub>4</sub>), filtered and the solvent was removed in vacuo to give **5** (49 mg, 92%) as a white solid.<sup>3</sup>

<sup>1</sup>H NMR (400 MHz, Chloroform-*d*) δ 8.26 (dd, *J* = 7.9, 1.7 Hz, 1H), 7.69 (ddd, *J* = 8.6, 7.0, 1.7 Hz, 1H), 7.47 – 7.41 (m, 2H), 3.59 (d, *J* = 1.2 Hz, 2H), 3.01 (tt, *J* = 6.9, 1.3 Hz, 2H), 2.68 (t, *J* = 6.9 Hz, 2H).

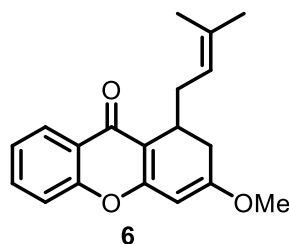

A 25 mL of flame-dried flask charged with compound **3a** (57 mg, 0.25 mmol) and THF (2 mL) was cooled to -78 °C. A solution of lithium diisopropylamide (2 M in THF, 0.3 mL, 0.6 mmol) was added dropwise. The solution was stirred for 30 min at -78 °C and then 3, 3-dimethylallyl bromide (95%, 69  $\mu$ L, 0.6 mmol) in THF (2 mL) was added dropwise. The reaction mixture was slowly warm to 0 °C and stirred at 0 °C for another 5 hours, and then quenched with saturated solution of NH<sub>4</sub>Cl. The aqueous phase was extracted with AcOEt (3  $\times$  5 mL), and the combined organic layers were dried over Na<sub>2</sub>SO<sub>4</sub>. Column chromatography yielded **6** as an oil in 63% yield.

<sup>1</sup>H NMR (600 MHz, Chloroform-*d*)  $\delta$  8.23 (dd, *J* = 7.9, 1.7 Hz, 1H), 7.59 (ddd, *J* = 8.6, 7.1, 1.7 Hz, 1H), 7.41 – 7.35 (m, 2H), 5.37 (s, 1H), 5.14 (dddt, *J* = 8.5, 6.8, 3.1, 1.5 Hz, 1H), 3.81 (s, 3H), 3.02 (dd, *J* = 16.5, 4.4 Hz, 1H), 2.76 (dd, *J* = 16.6, 7.8 Hz, 1H), 2.49 (ddt, *J* = 9.1, 7.8, 4.6 Hz, 1H), 2.26 – 2.13 (m, 2H), 1.71 (s, 4H), 1.56 (s, 4H).

<sup>13</sup>C NMR (151 MHz, CDCl<sub>3</sub>)  $\delta$  175.9, 173.7, 162.0, 155.5, 134.6, 132.2, 125.7, 124.4, 124.0, 120.9, 117.5, 107.7, 90.7, 56.0, 38.3, 29.8, 25.8, 23.1, 17.7.

HRESIMS calcd for C<sub>19</sub>H<sub>21</sub>O<sub>3</sub> [M + H]<sup>+</sup> 297.1491, found 297.1490.

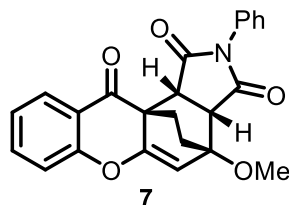

The DHX **3a** (0.3 mmol) and *N*-phenyl maleimide (1.8 mmol, 6 equiv.) in a sealed tube was heated to 100 °C for 24 hours. After cooling. The mixture was purified directly by column chromatography to furnish the product **7** as a white solid in 71% yield.

m.p. = 219 °C.

<sup>1</sup>H NMR (400 MHz, Chloroform-*d*)  $\delta$  8.05 (dd, *J* = 7.9, 1.8 Hz, 1H), 7.56 (ddd, *J* = 8.7, 7.2, 1.8 Hz, 1H), 7.43 – 7.31 (m, 3H), 7.20 – 7.13 (m, 3H), 7.03 (dd, *J* = 8.4, 1.1 Hz, 1H), 5.79 (s, 1H), 4.00 (d, *J* = 8.4 Hz, 1H), 3.61 (s, 3H), 3.40 (d, *J* = 8.5 Hz, 1H), 2.28 (ddd, *J* = 12.9, 9.9, 4.9 Hz, 1H), 2.12 – 2.05 (m, 1H), 1.83 (td, *J* = 12.6, 3.6 Hz, 1H), 1.67 – 1.57 (m, 2H).

<sup>13</sup>C NMR (101 MHz, CDCl<sub>3</sub>)  $\delta$  191.1, 174.9, 173.4, 156.9, 149.8, 136.8, 131.4, 129.0, 128.7, 127.1, 126.3, 123.1, 118.2, 117.4, 106.3, 80.1, 51.5, 50.1, 46.3, 45.0, 28.9, 27.9.

HRESIMS calcd for C<sub>24</sub>H<sub>20</sub>NO<sub>5</sub> [M + H]<sup>+</sup> 402.1341, found 402.1340.

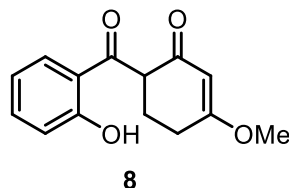

White solid, quantitative. m.p. = 135 °C.

<sup>1</sup>H NMR (600 MHz, Chloroform-*d*)  $\delta$  12.15 (s, 1H), 7.82 (dd, *J* = 8.0, 1.5 Hz, 1H), 7.48 (ddd, *J* = 8.6, 7.2, 1.6 Hz, 1H), 6.99 (dd, *J* = 8.4, 1.1 Hz, 1H), 6.93 (ddd, *J* = 8.2, 7.1, 1.2 Hz, 1H), 5.47 (s, 1H), 4.38 (dd, *J* = 8.6, 5.1 Hz, 1H), 3.75 (s, 3H), 2.74 – 2.68 (m, 1H), 2.56 – 2.44 (m, 2H), 2.26 – 2.19 (m, 1H).

<sup>13</sup>C NMR (151 MHz, CDCl<sub>3</sub>)  $\delta$  204.3, 194.6, 178.8, 162.9, 136.7, 131.5, 119.7, 119.1, 118.5, 102.2, 56.0, 53.0, 27.3, 24.3.

HRESIMS calcd for C<sub>14</sub>H<sub>13</sub>O<sub>4</sub> [M - H]<sup>-</sup> 245.0814, found 245.0816.

## References

---

- <sup>1</sup> Cavitt, S. B.; *J. Org. Chem.* 1962, 1211-1216
- <sup>2</sup> Zhao, Jian; *J. Org. Chem.* **2007**, 72, 583-588.
- <sup>3</sup> P. A. Turner a, S. a, J. L. Whatmore, M. Shipman, *Tetrahedron Lett.* **2013**, 54, 6538–6540.

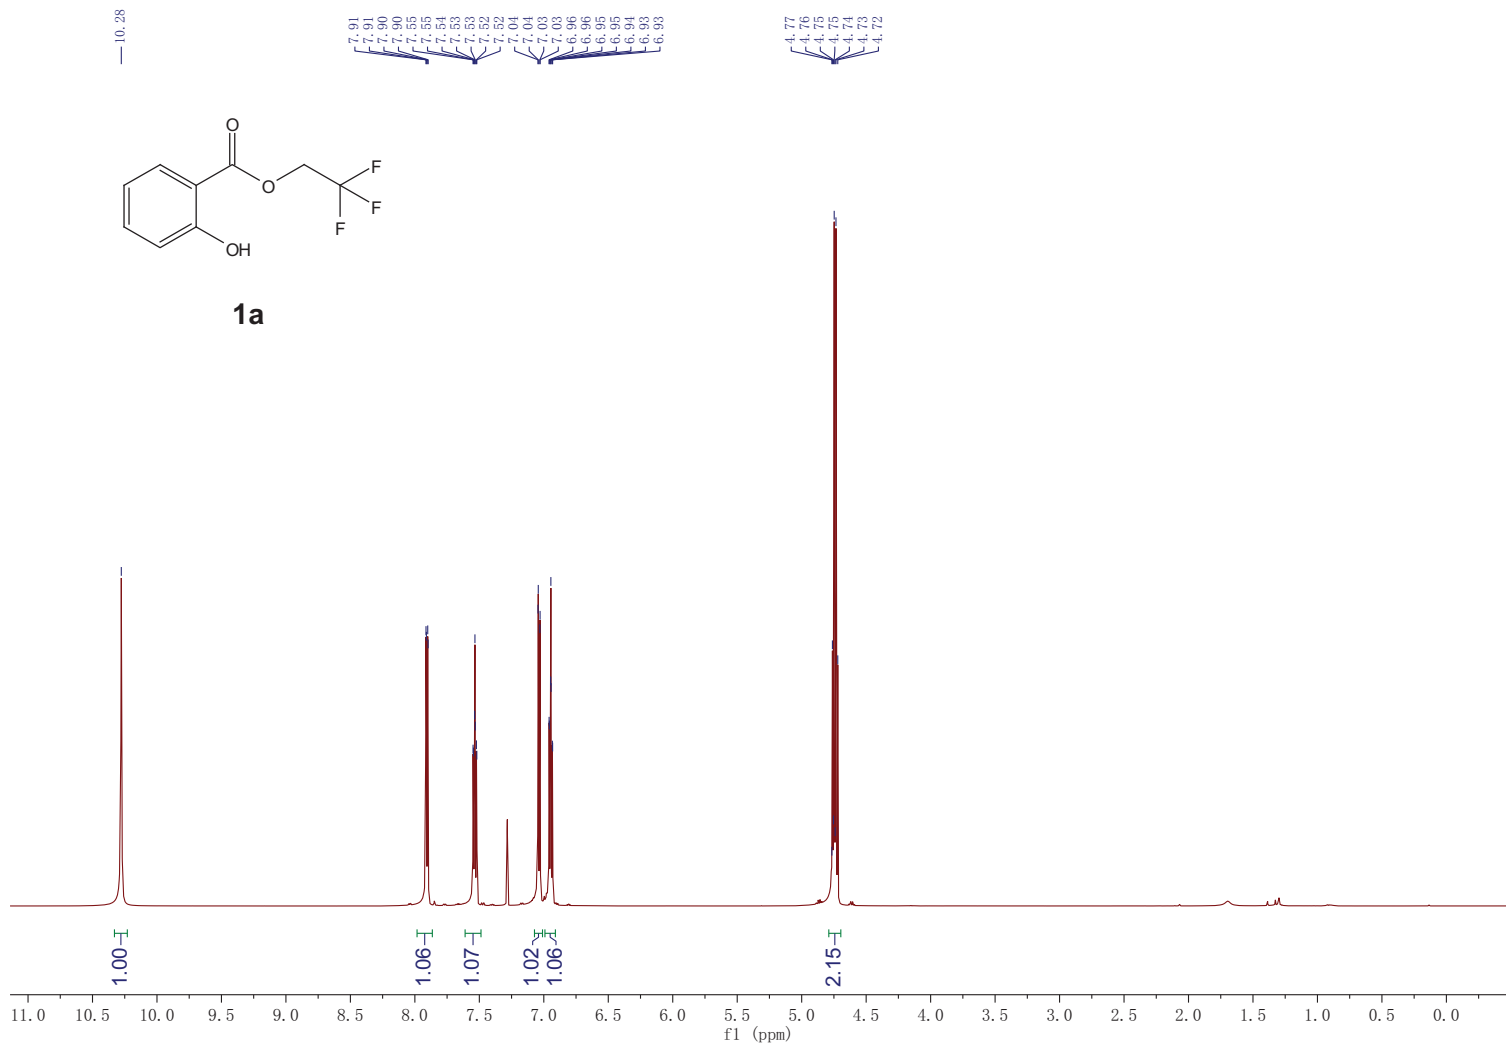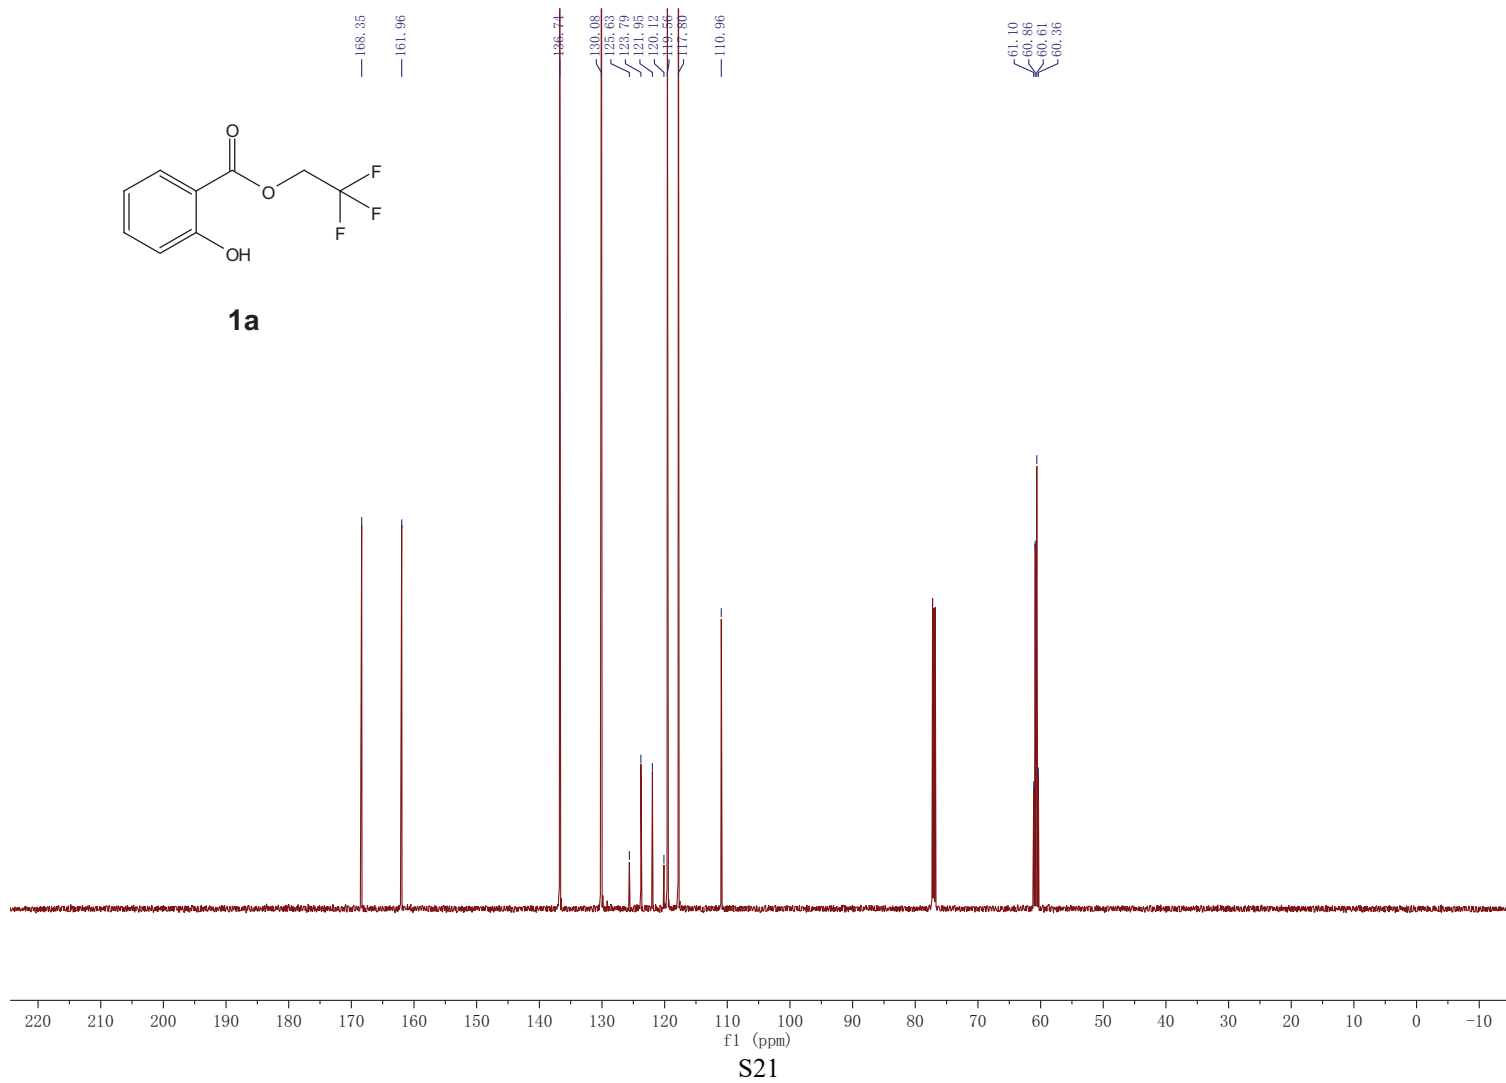

<sup>19</sup>F NMR

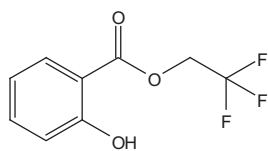

**1a**

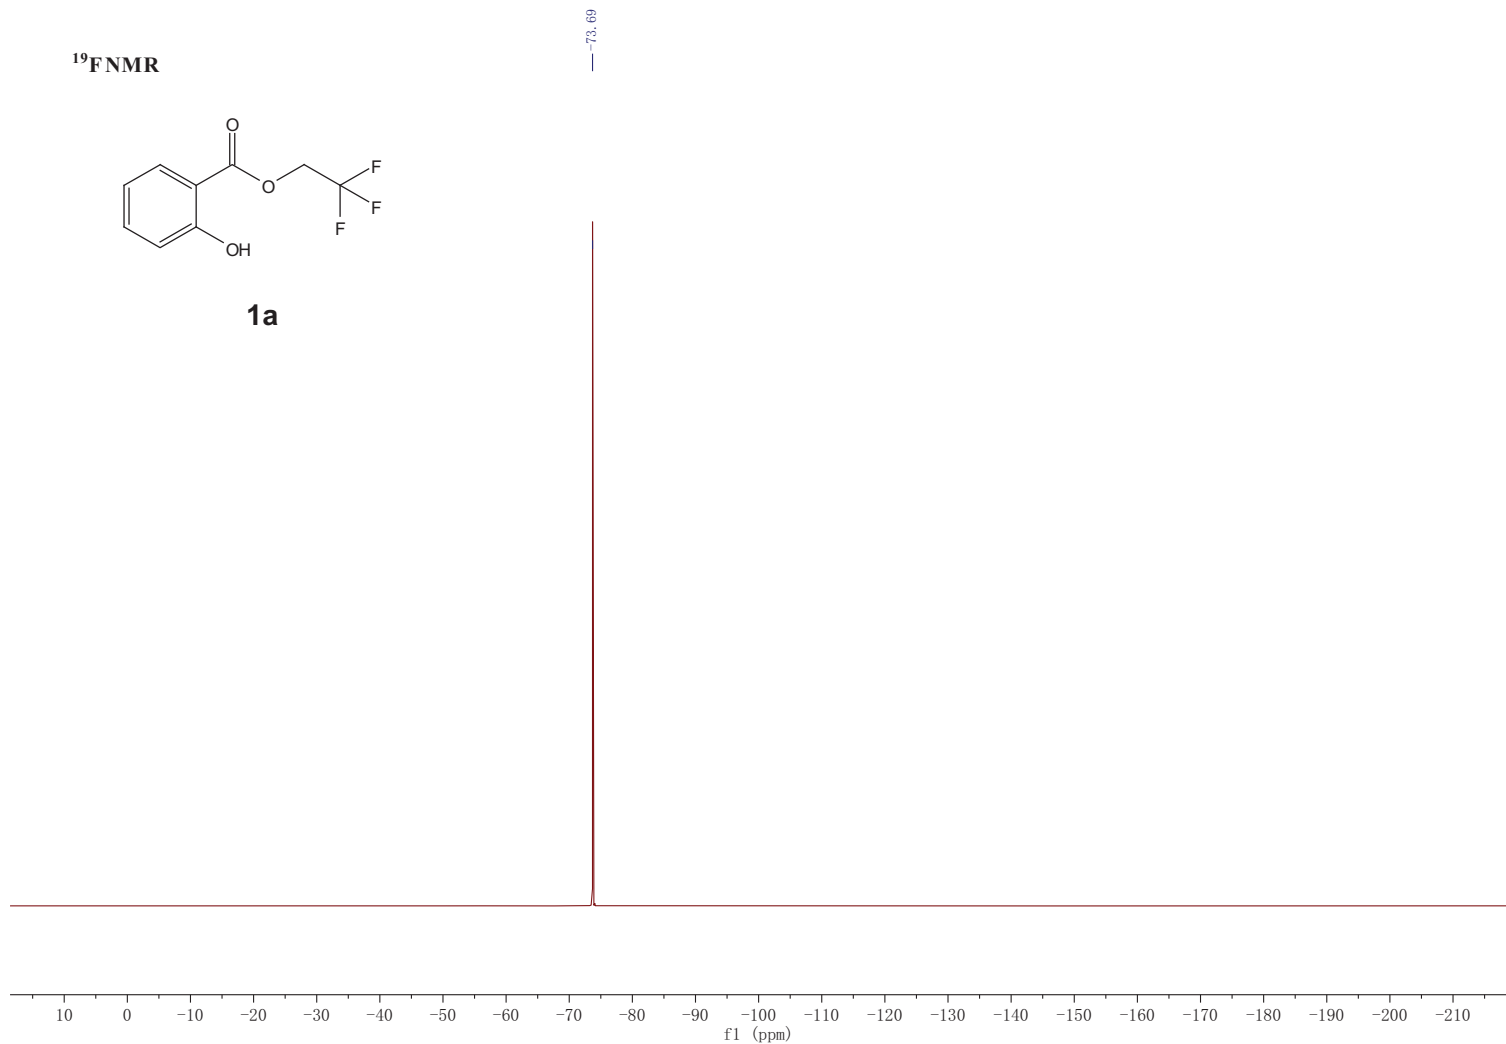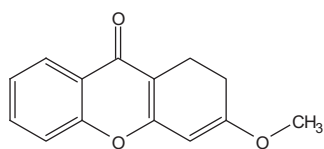

**3a**

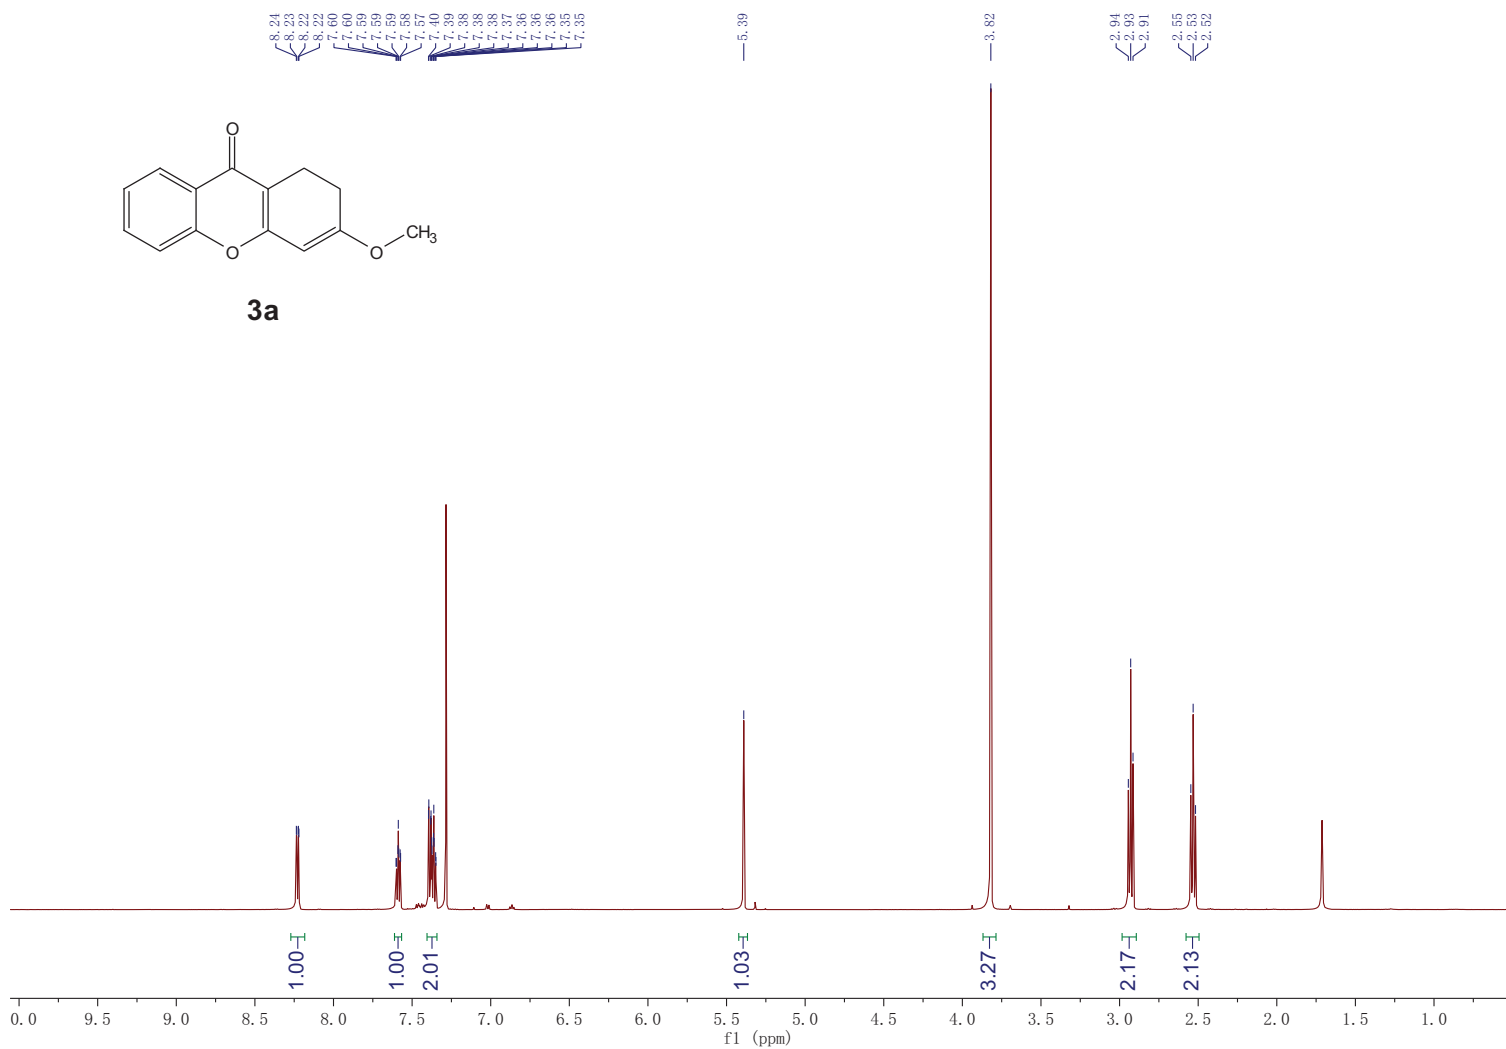

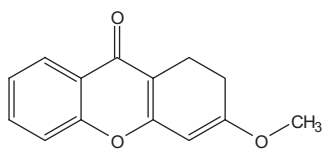

**3a**

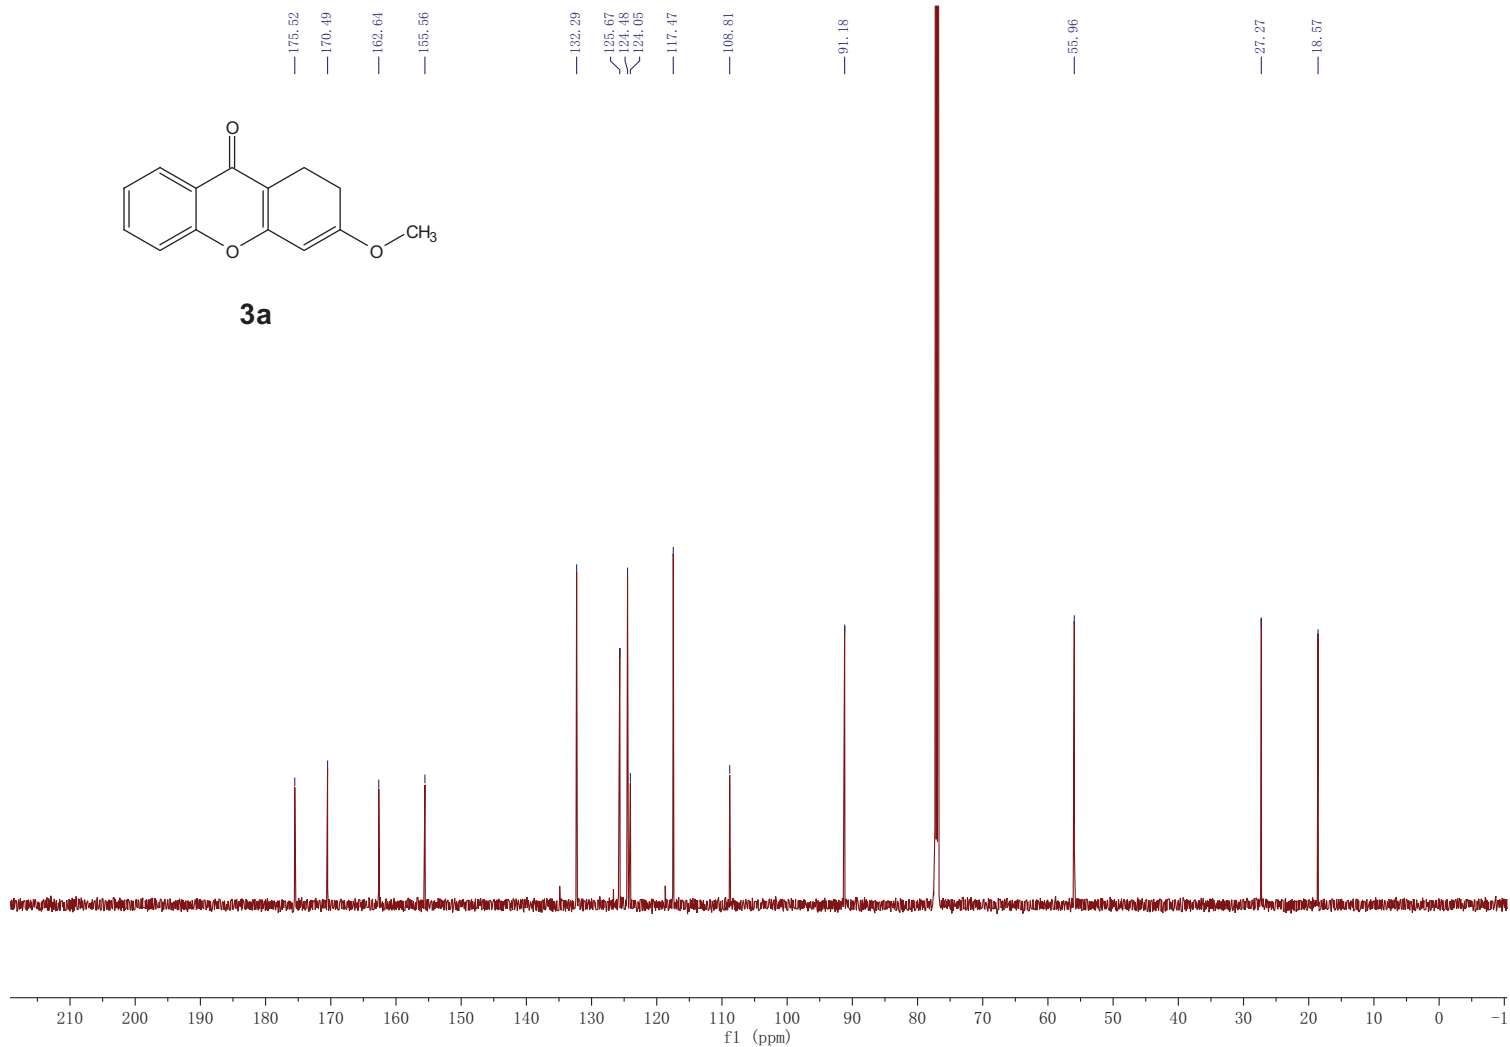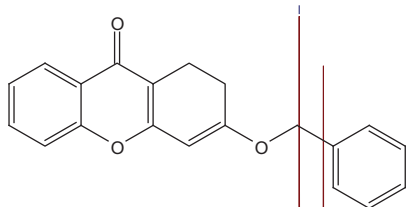

**3b**

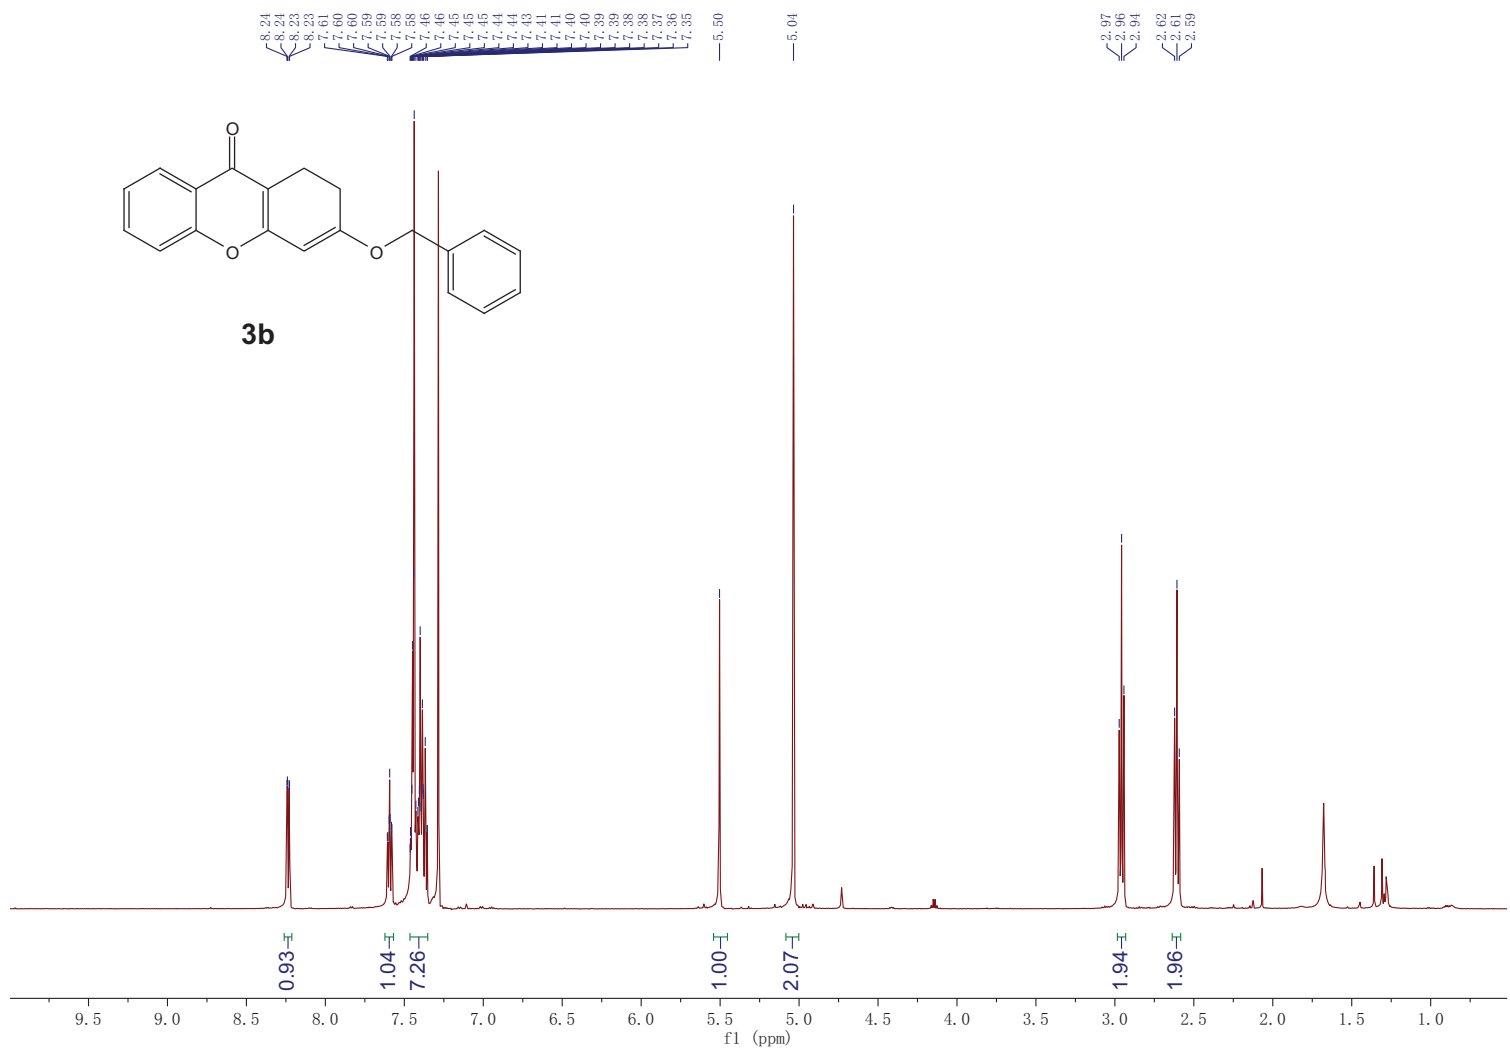

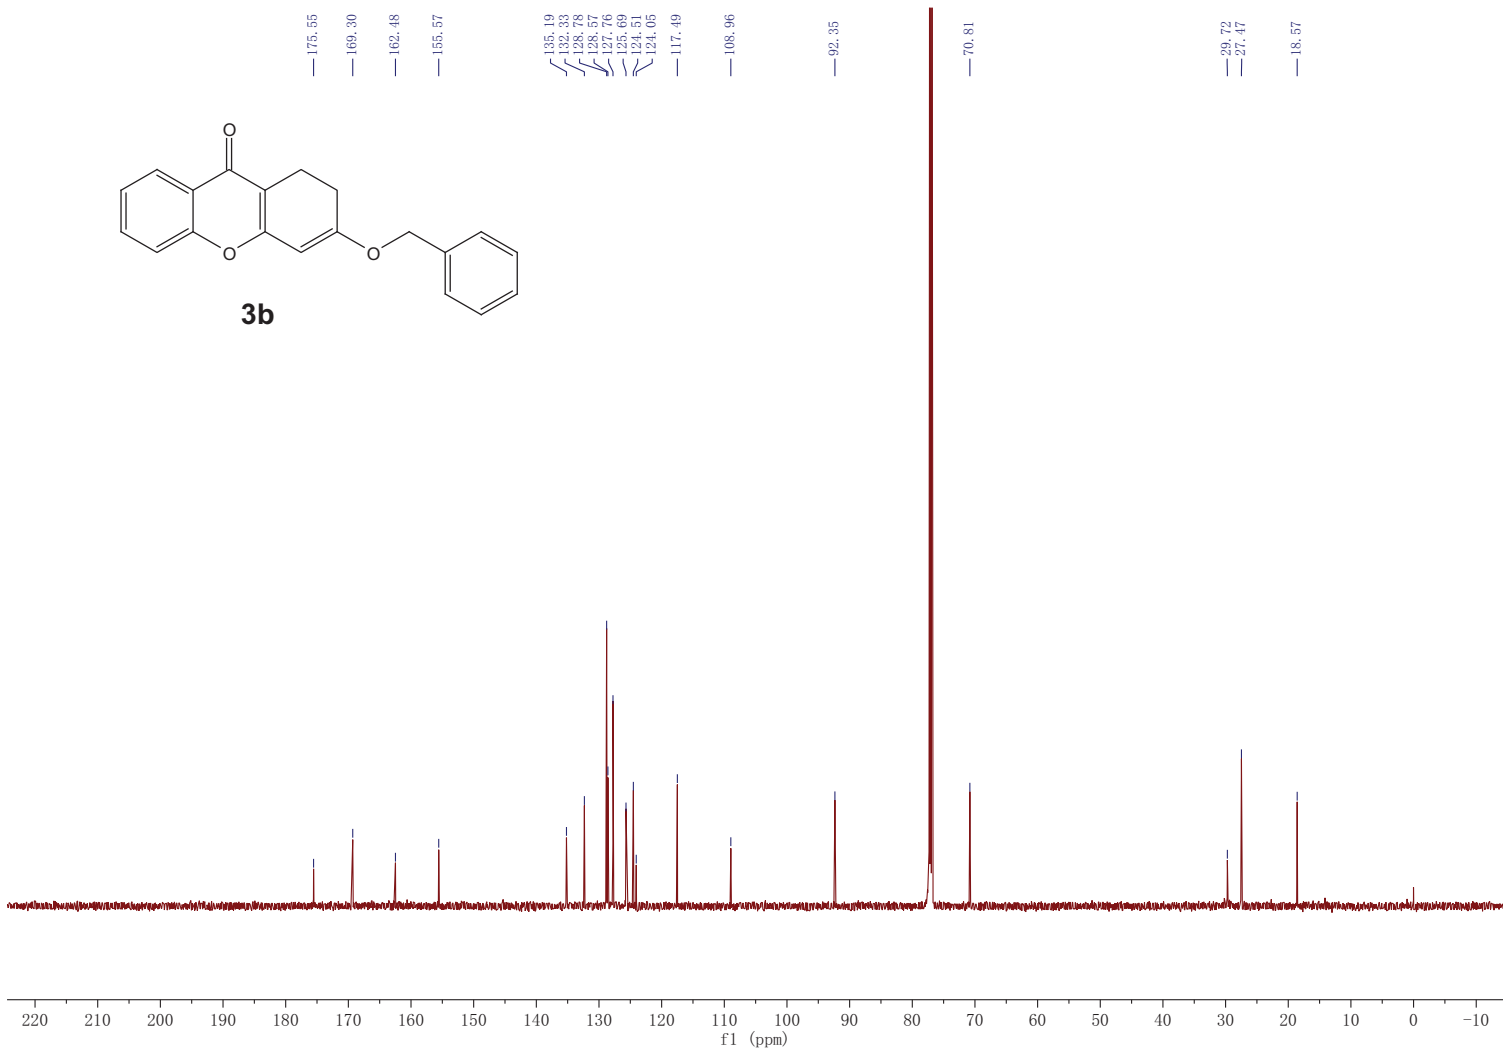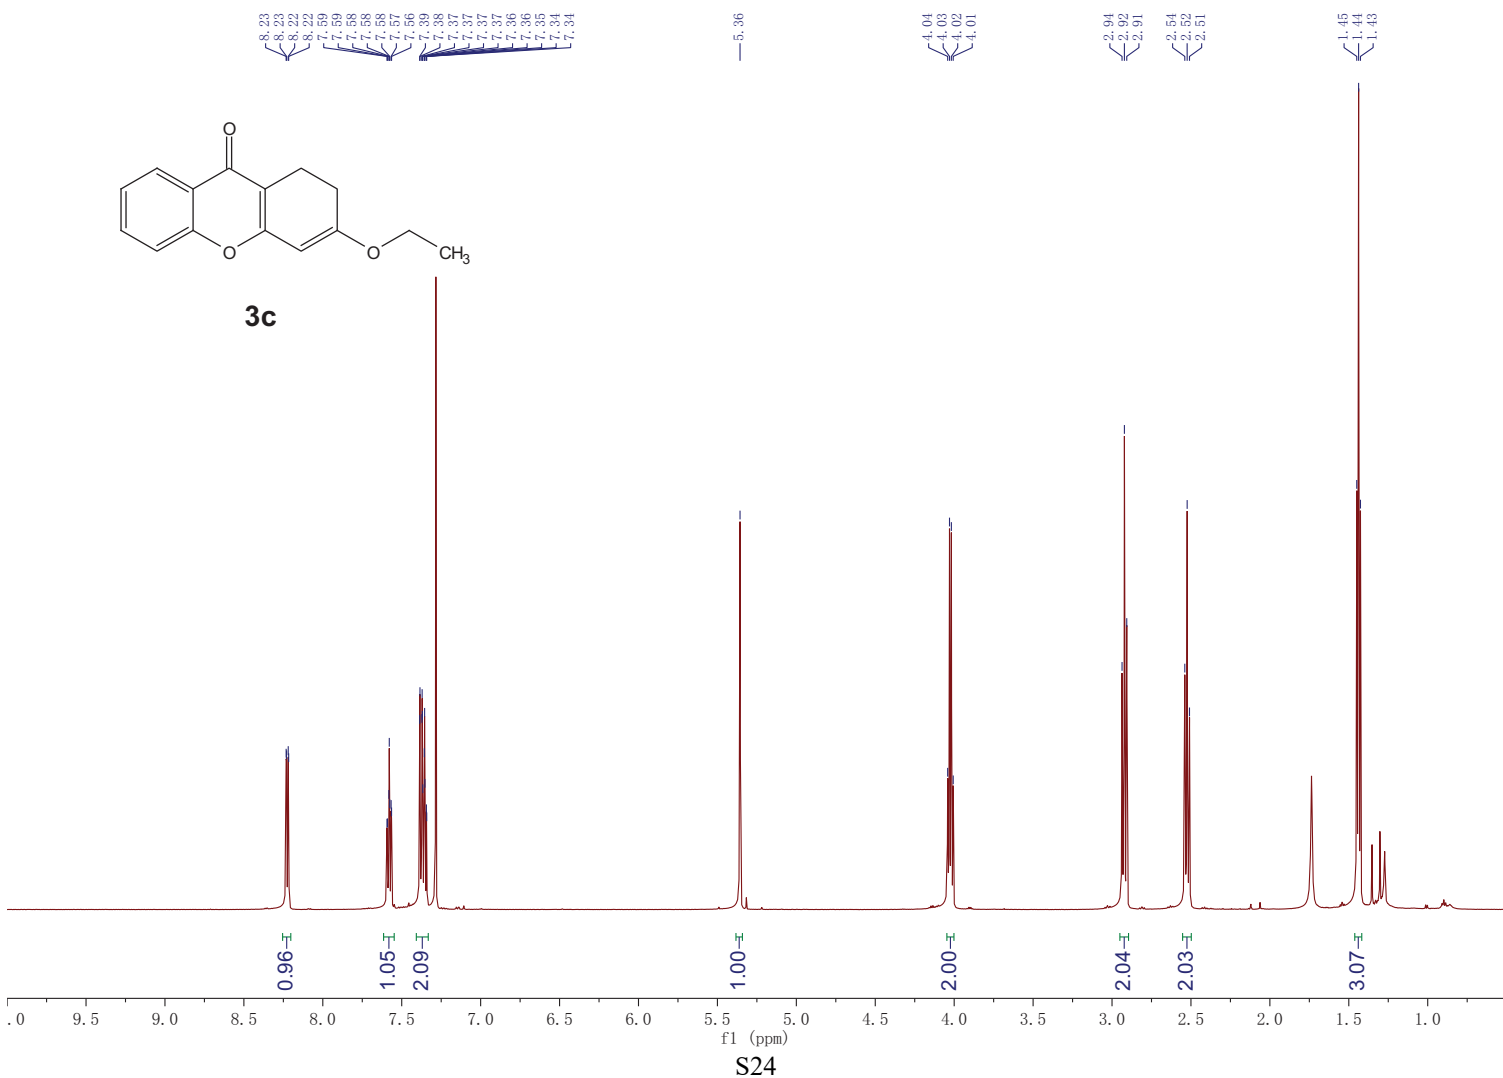



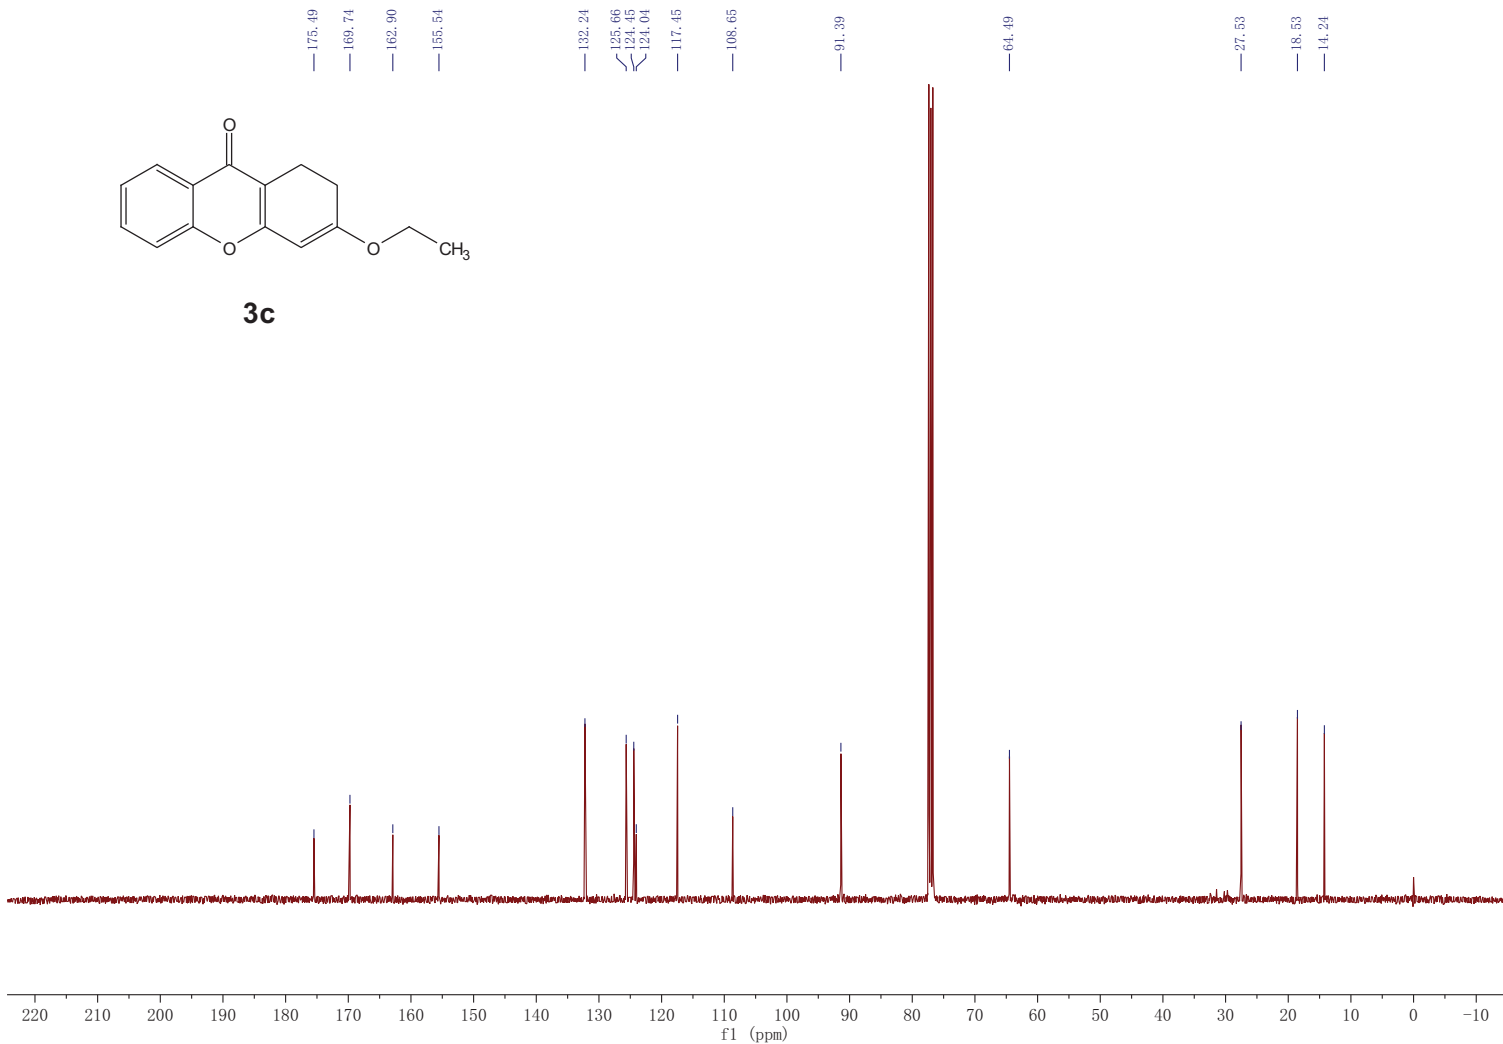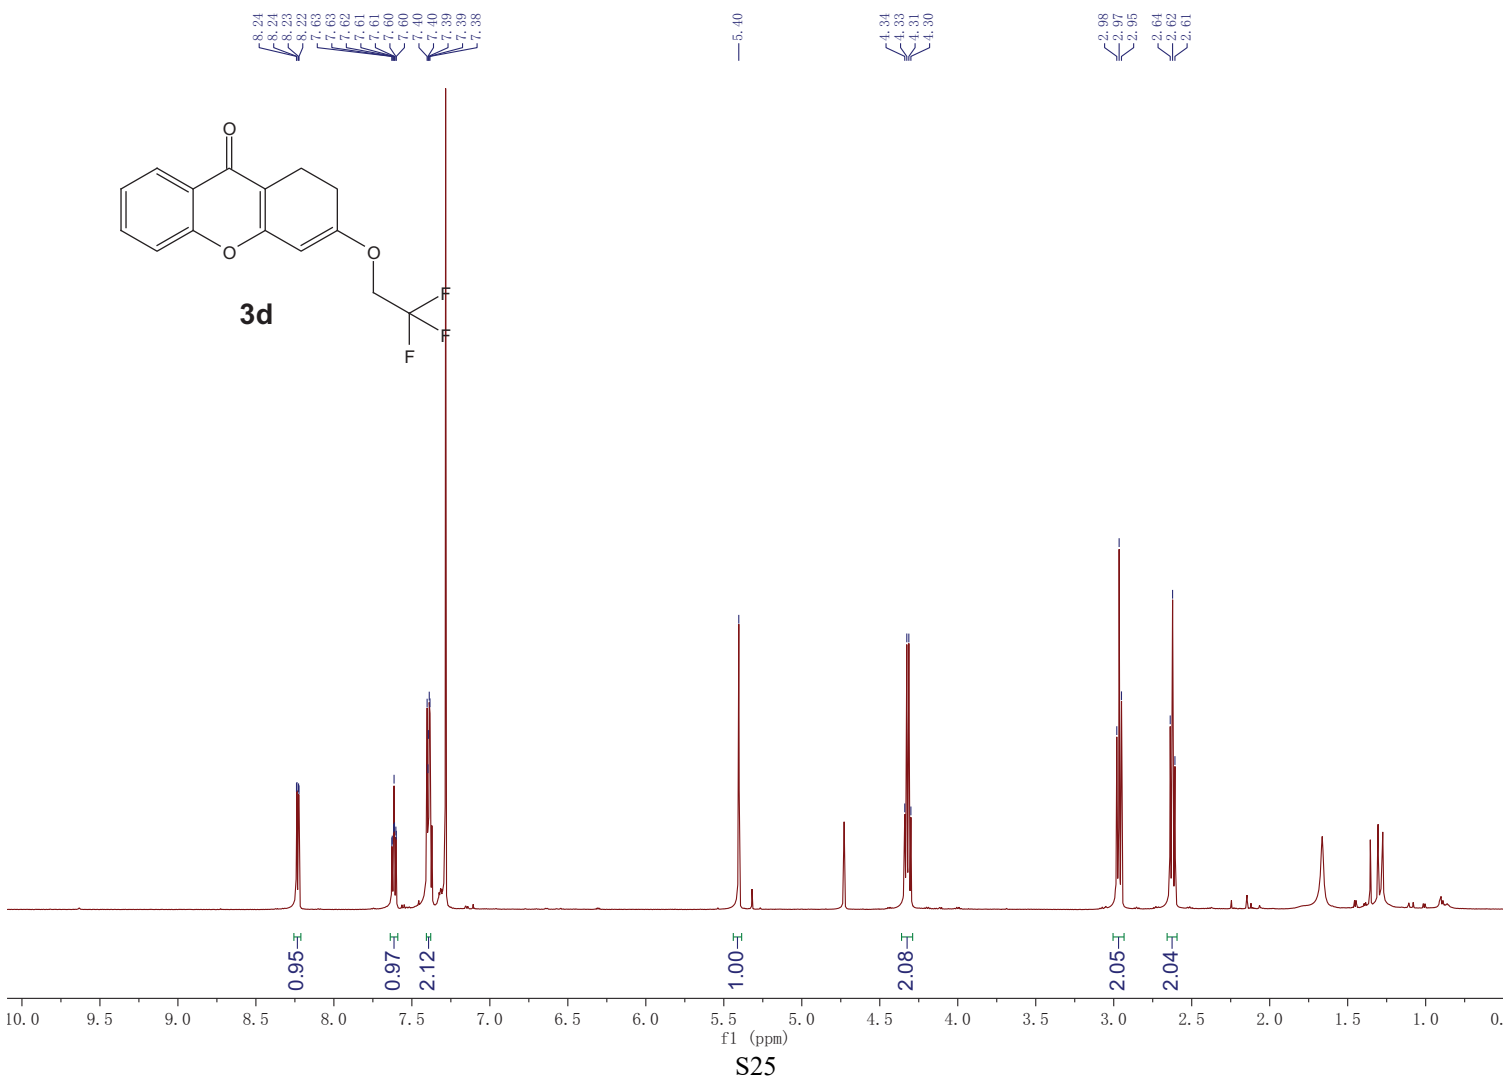

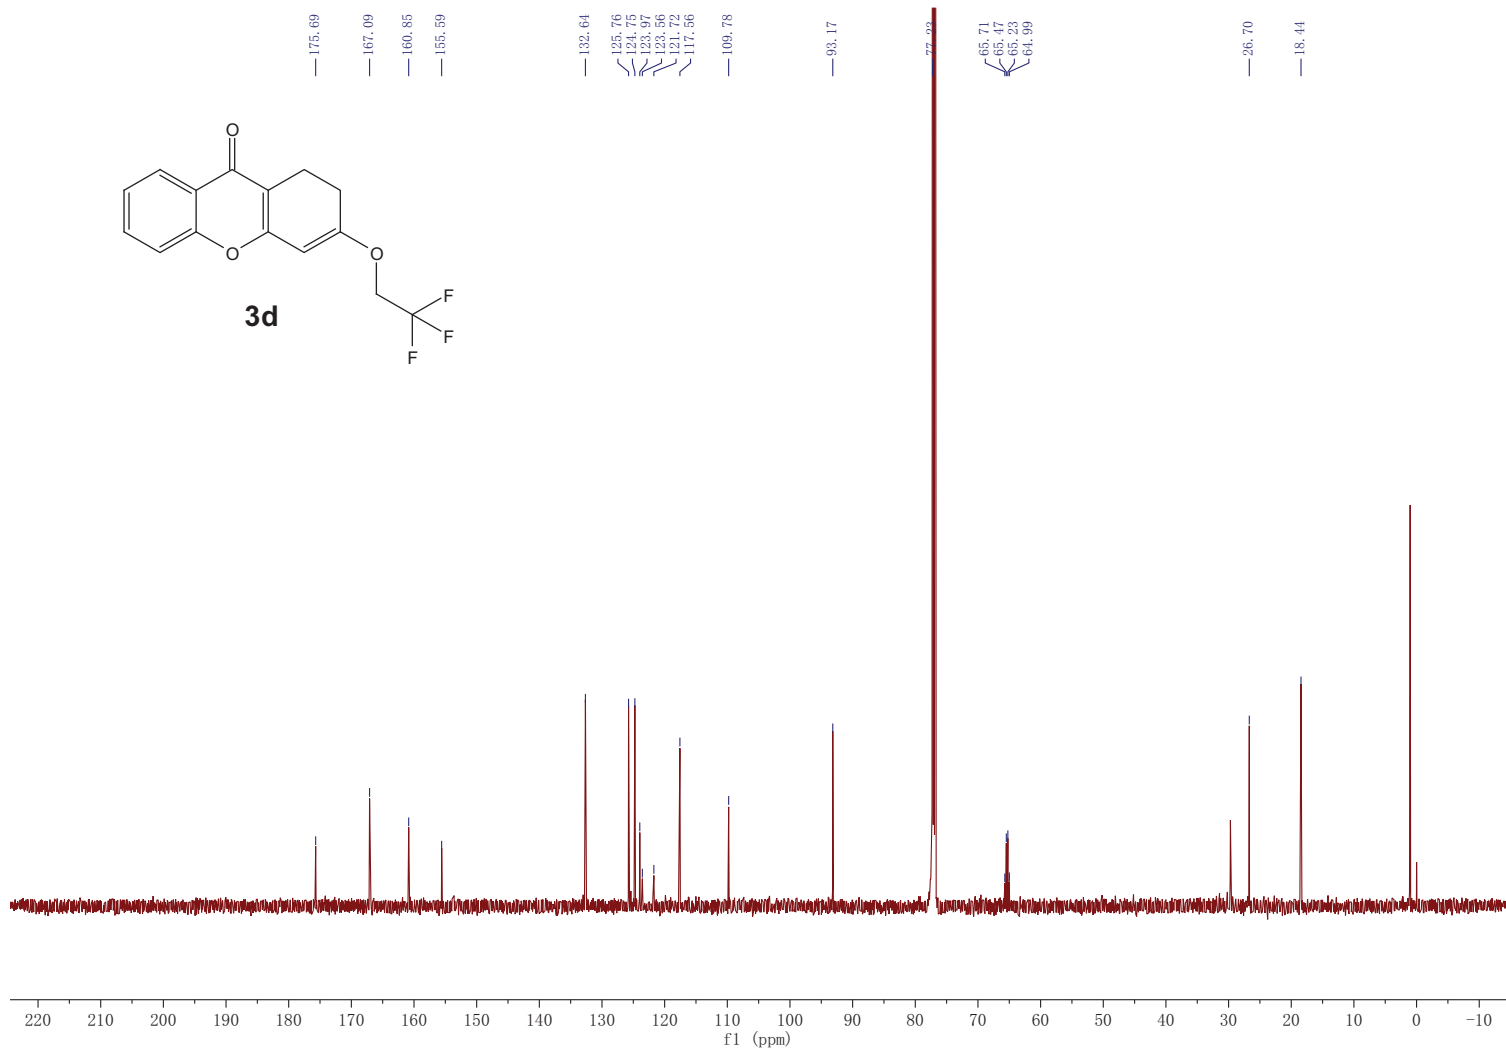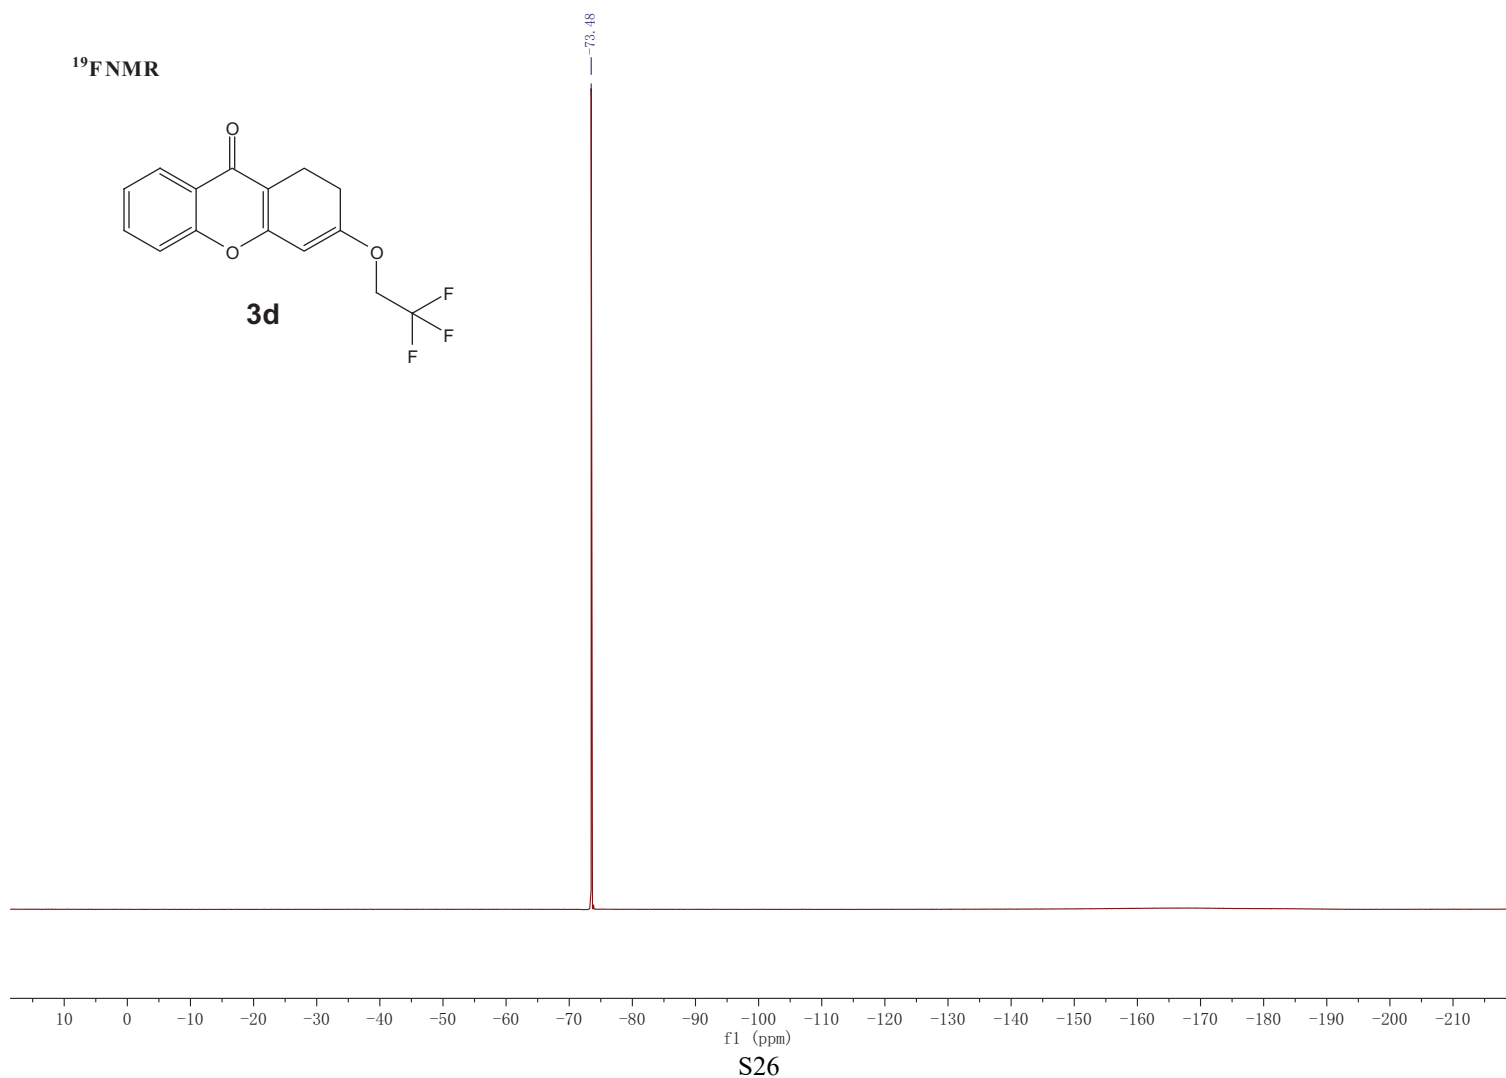

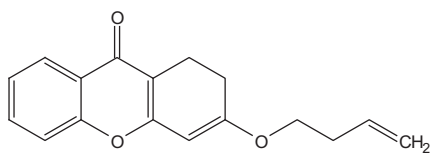

**3e**

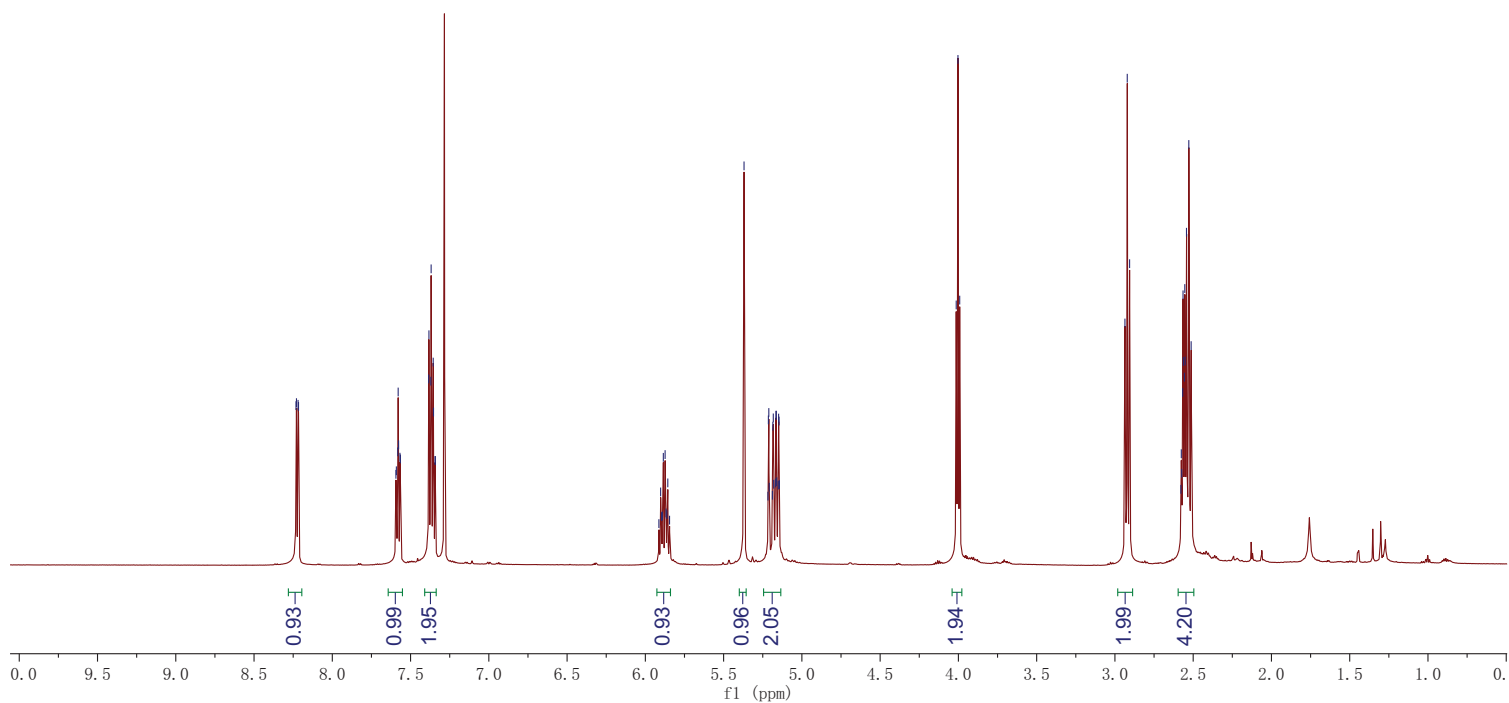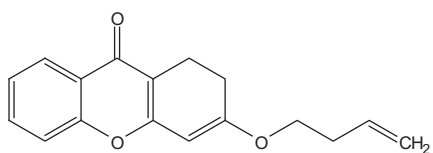

**3e**

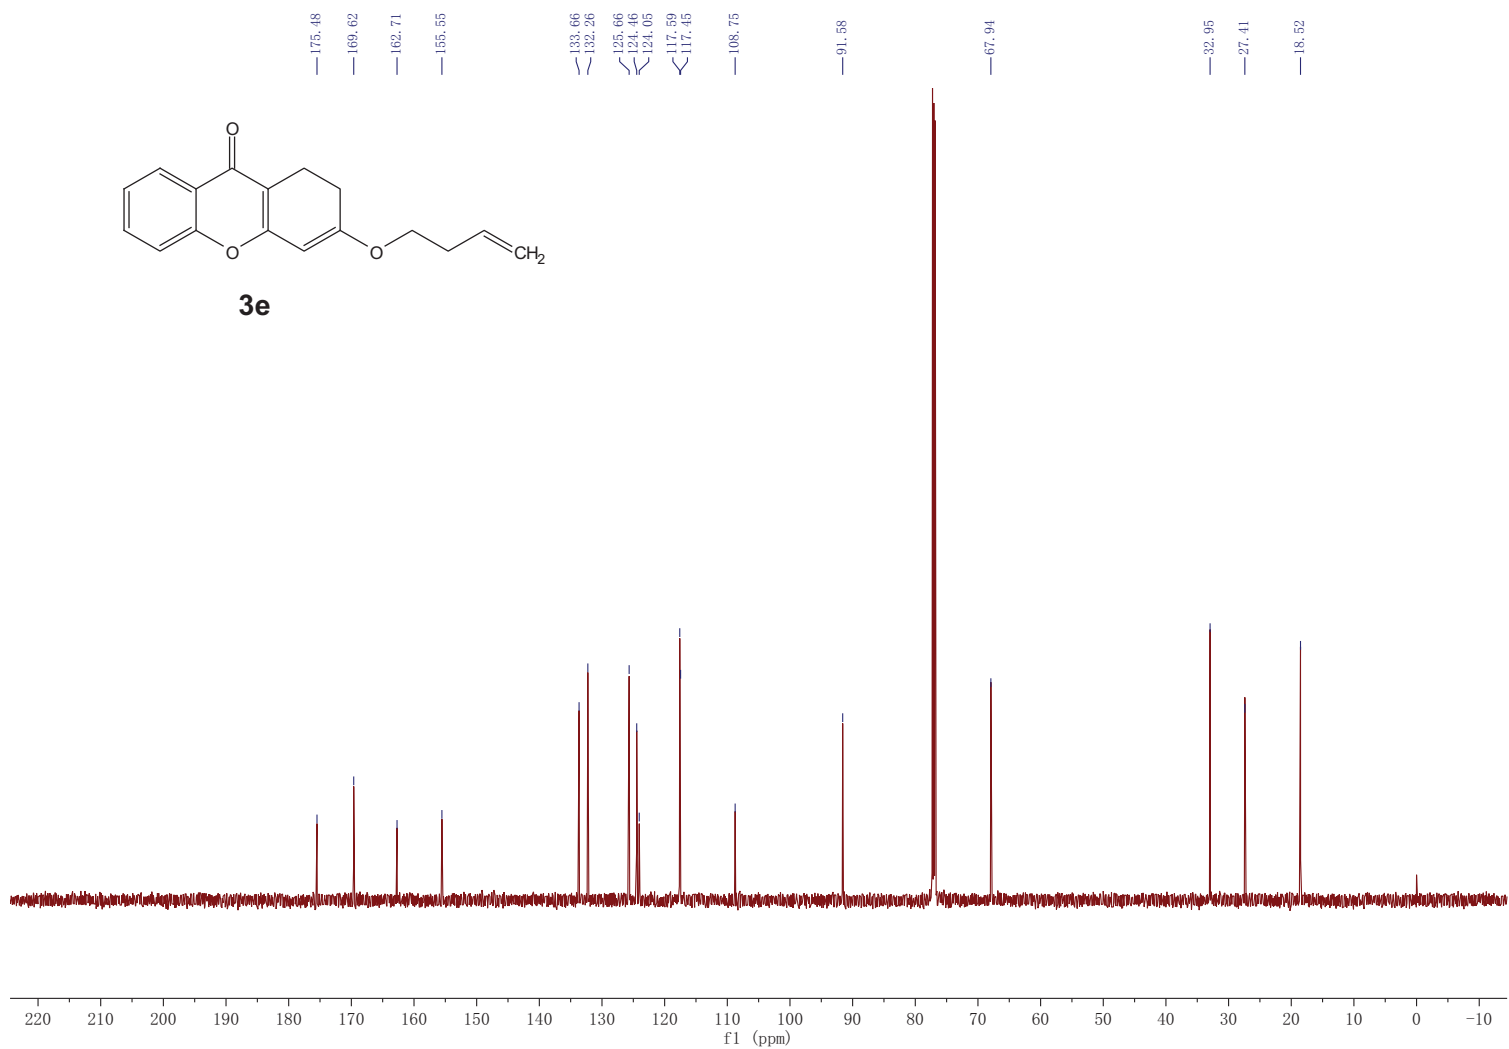

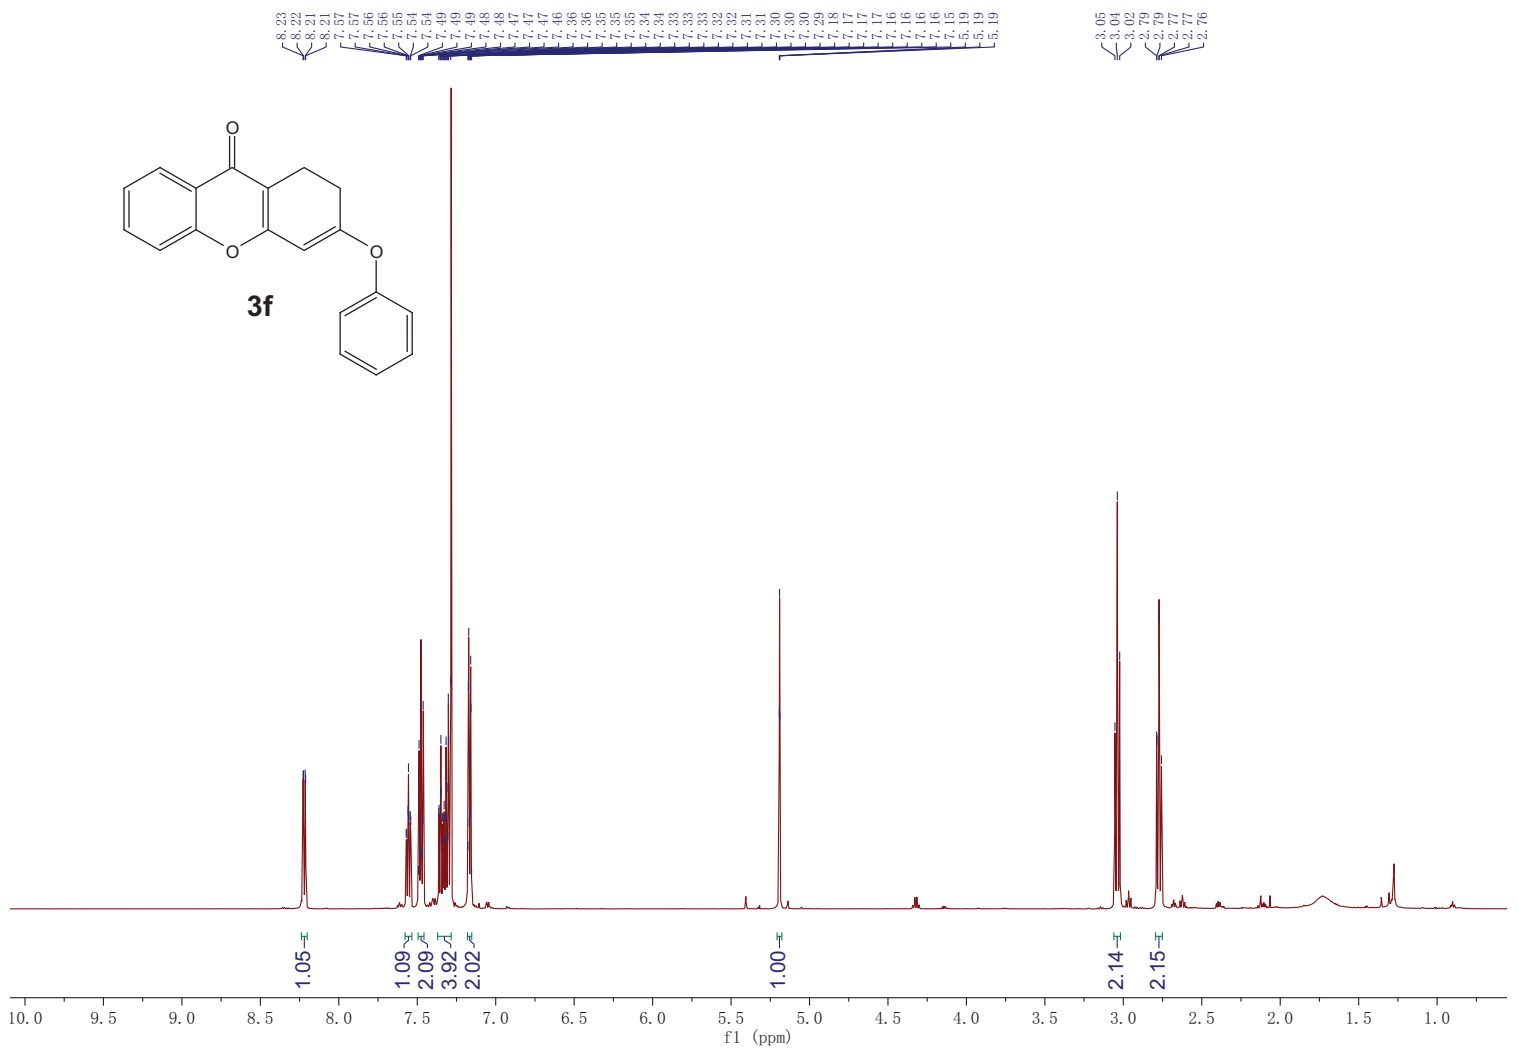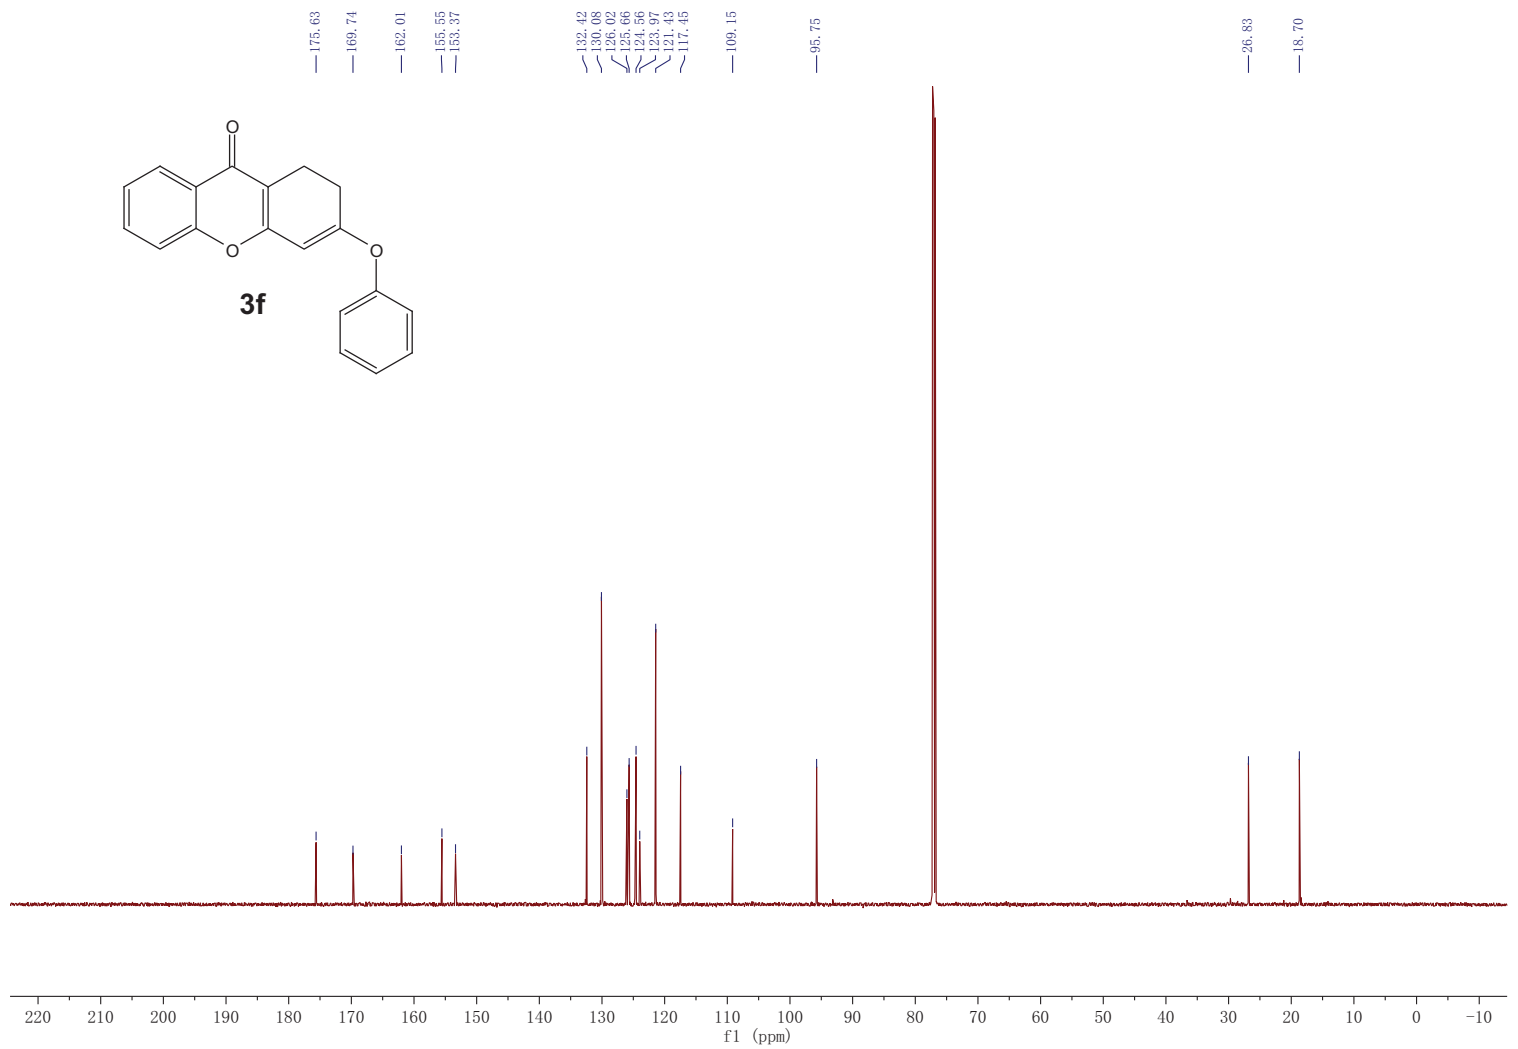

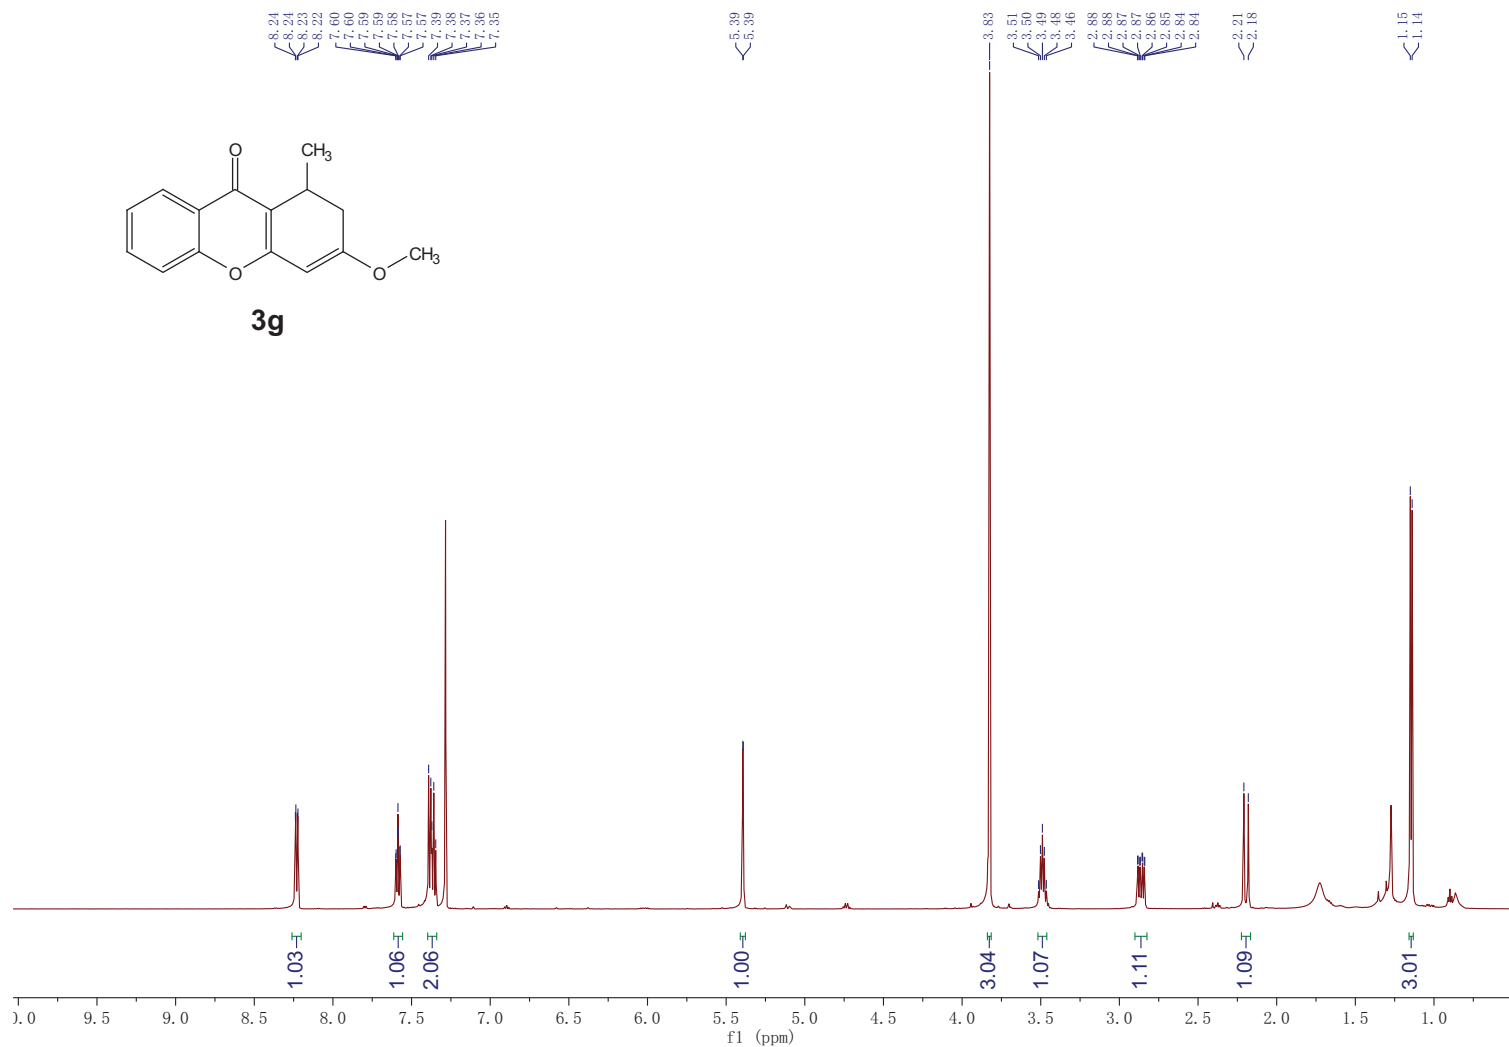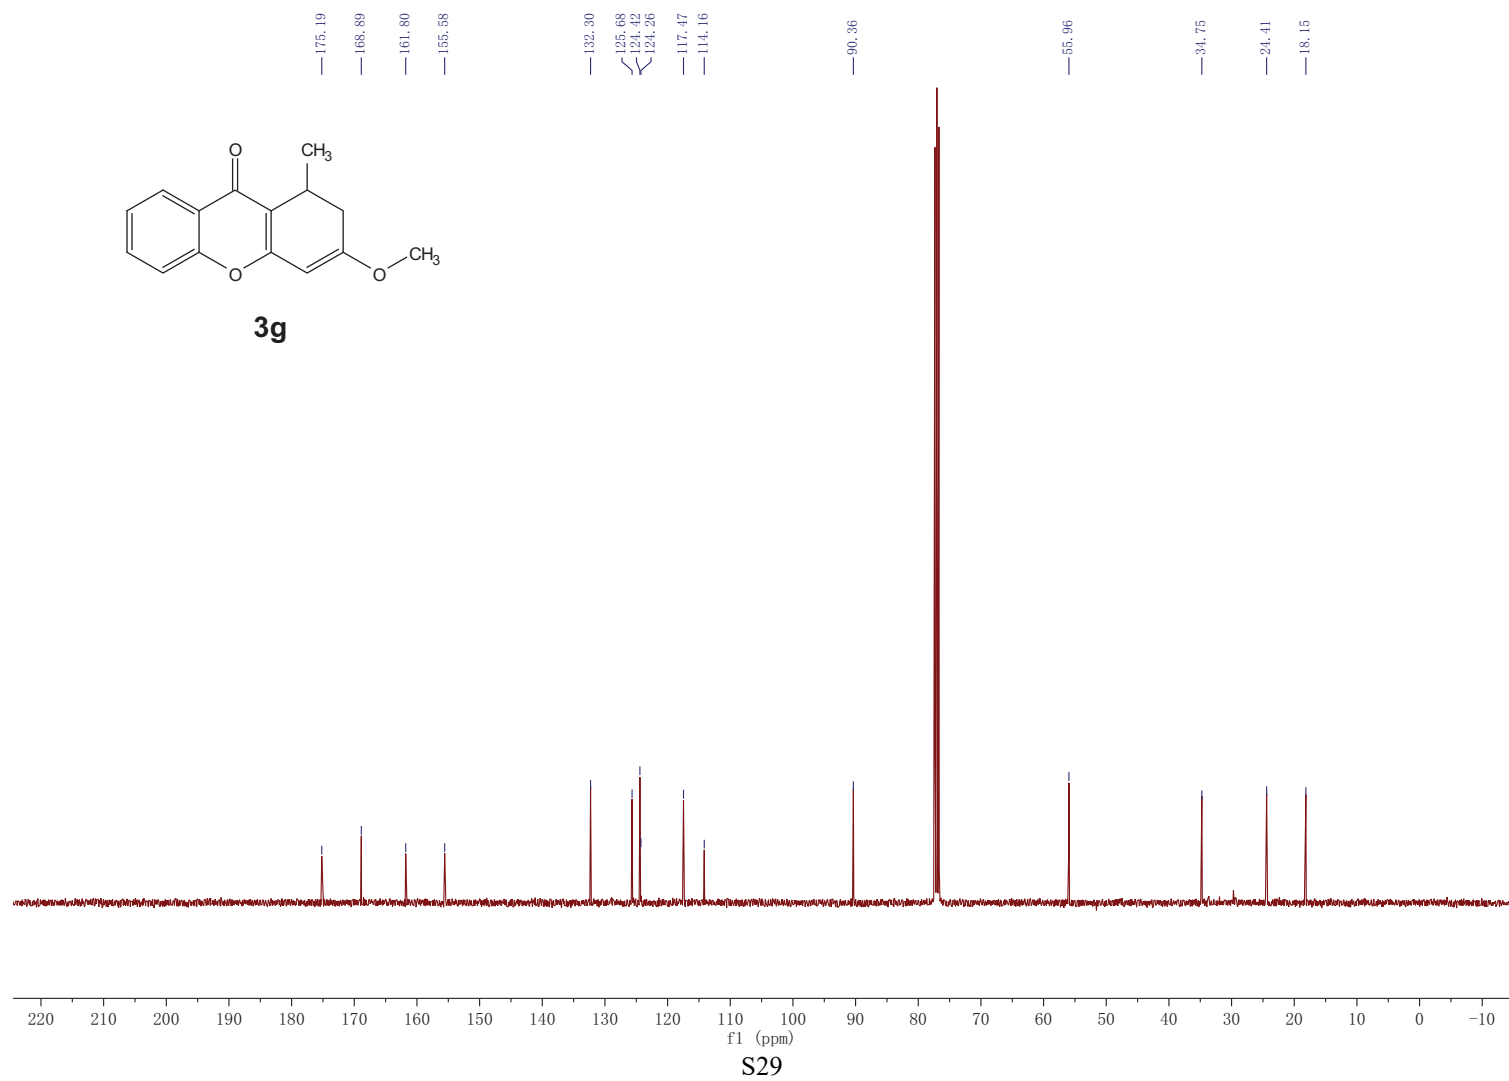

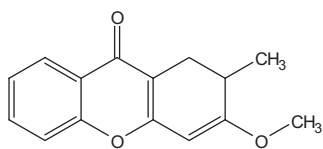

**3h**

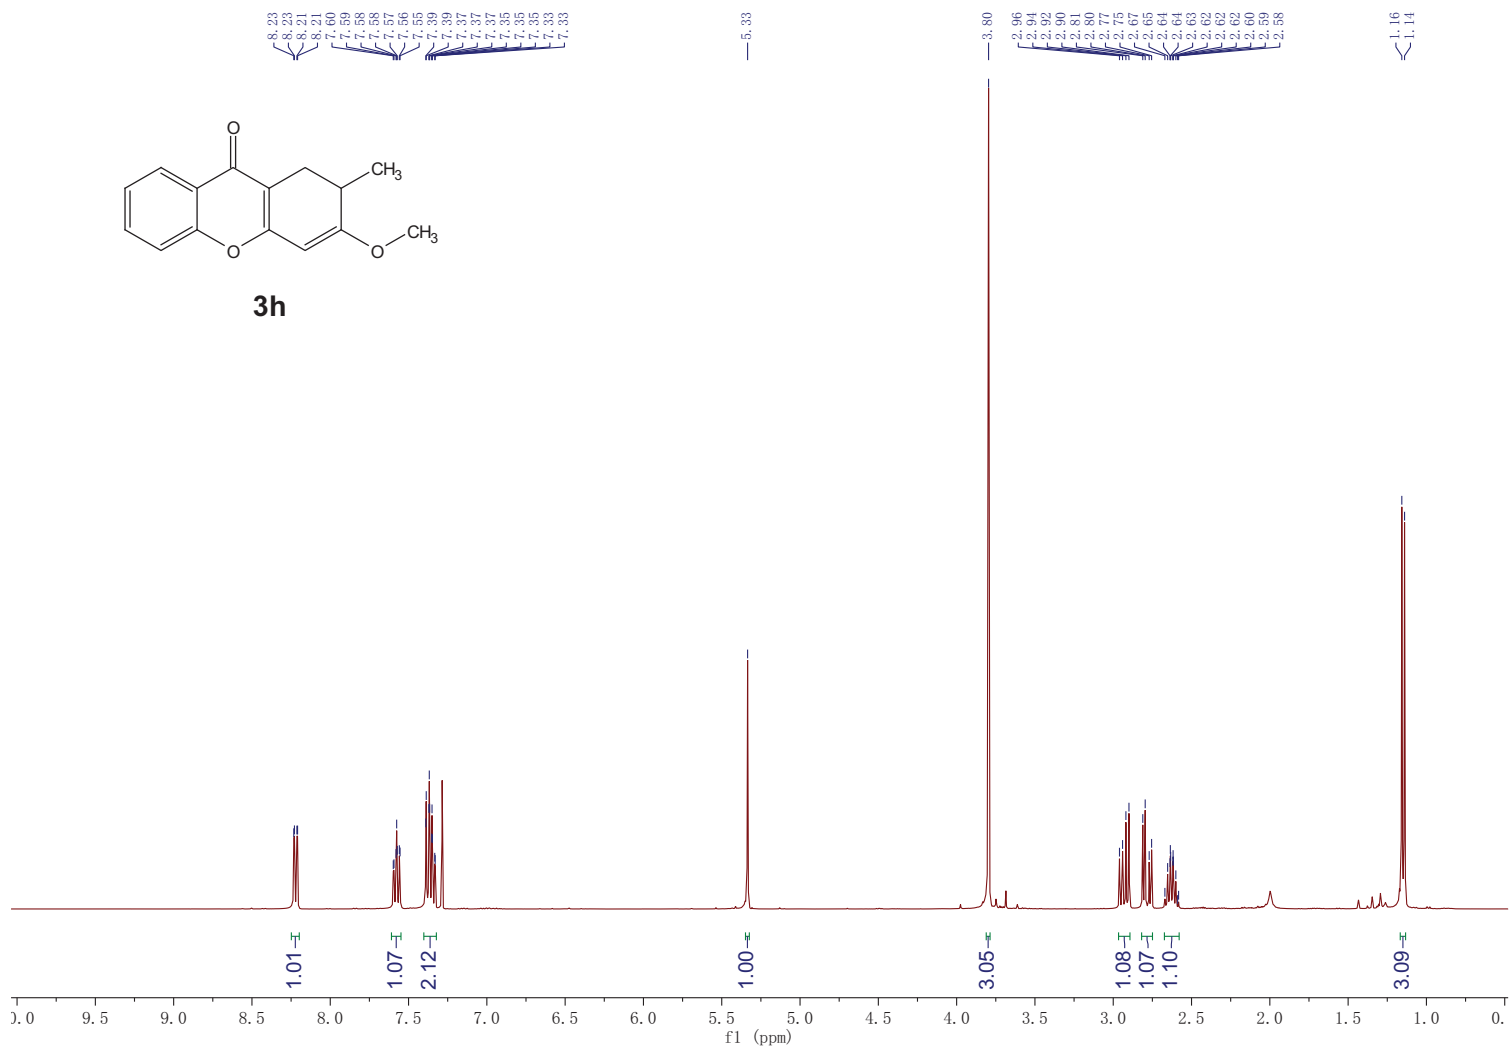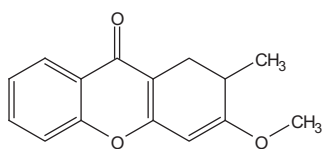

**3h**

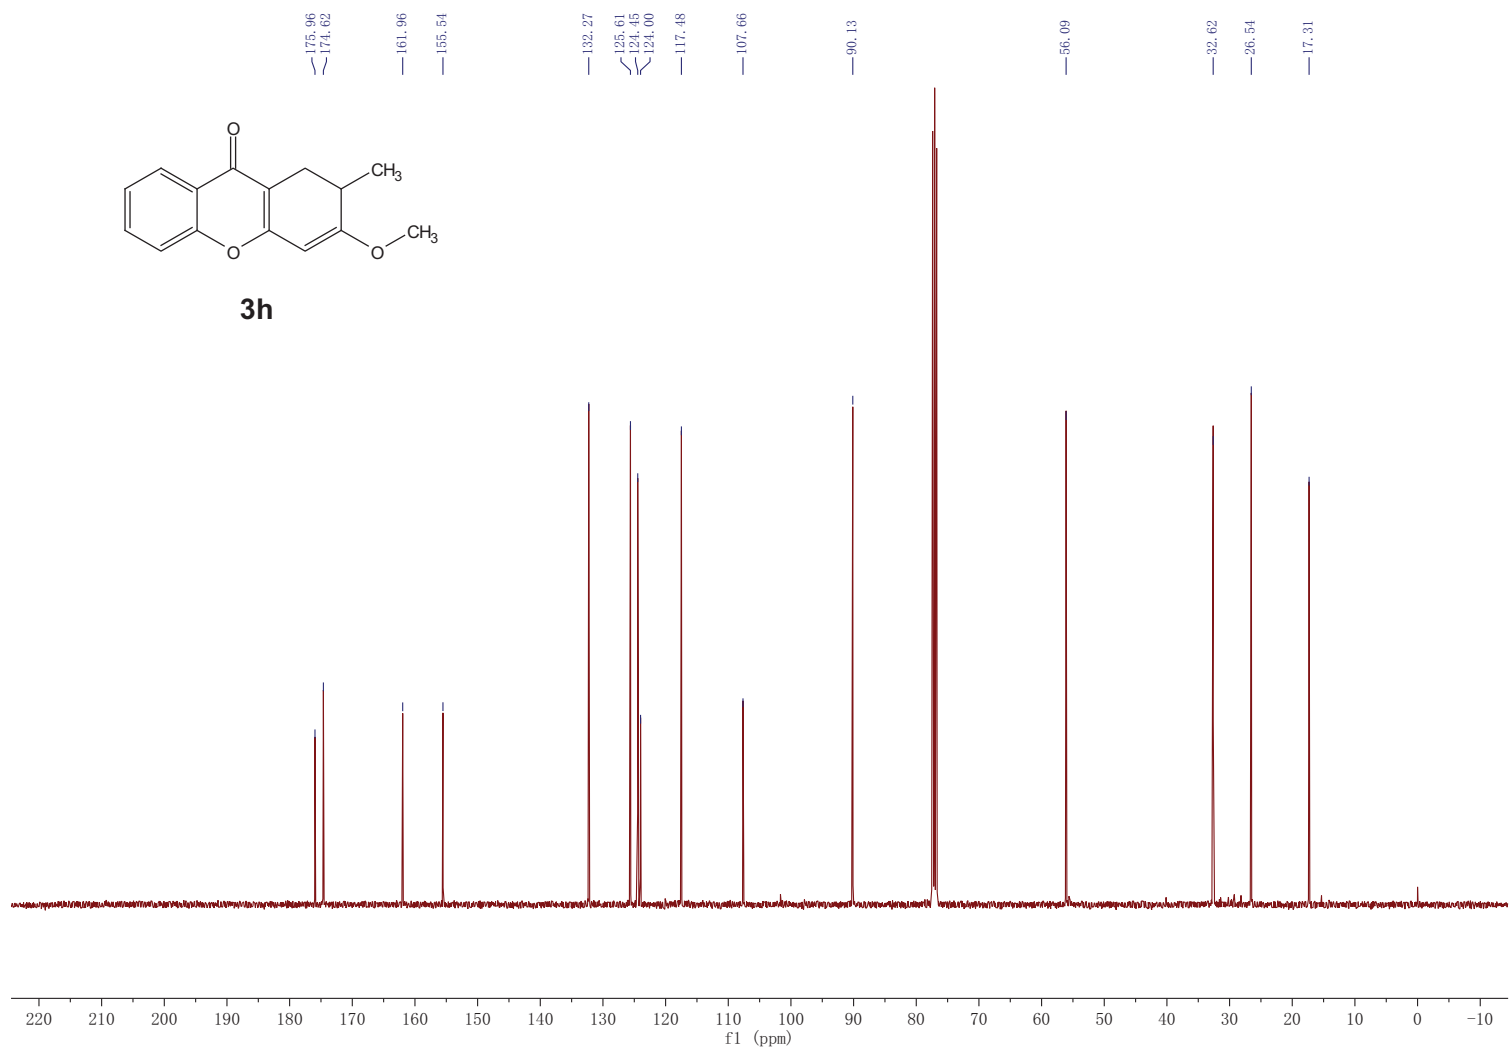

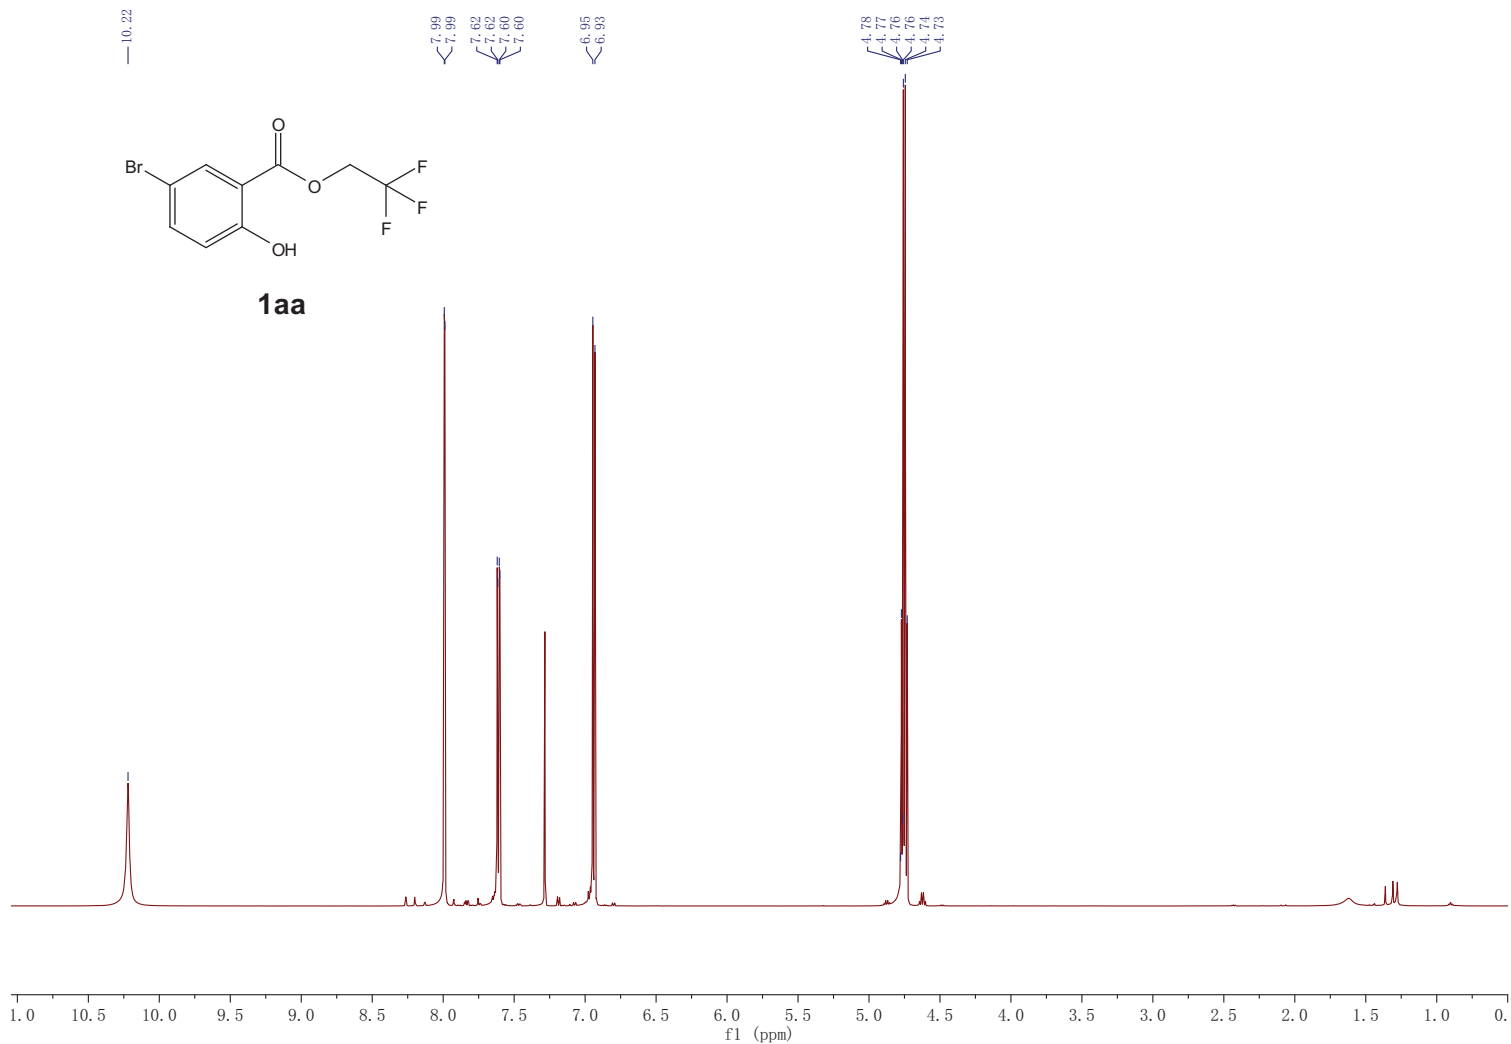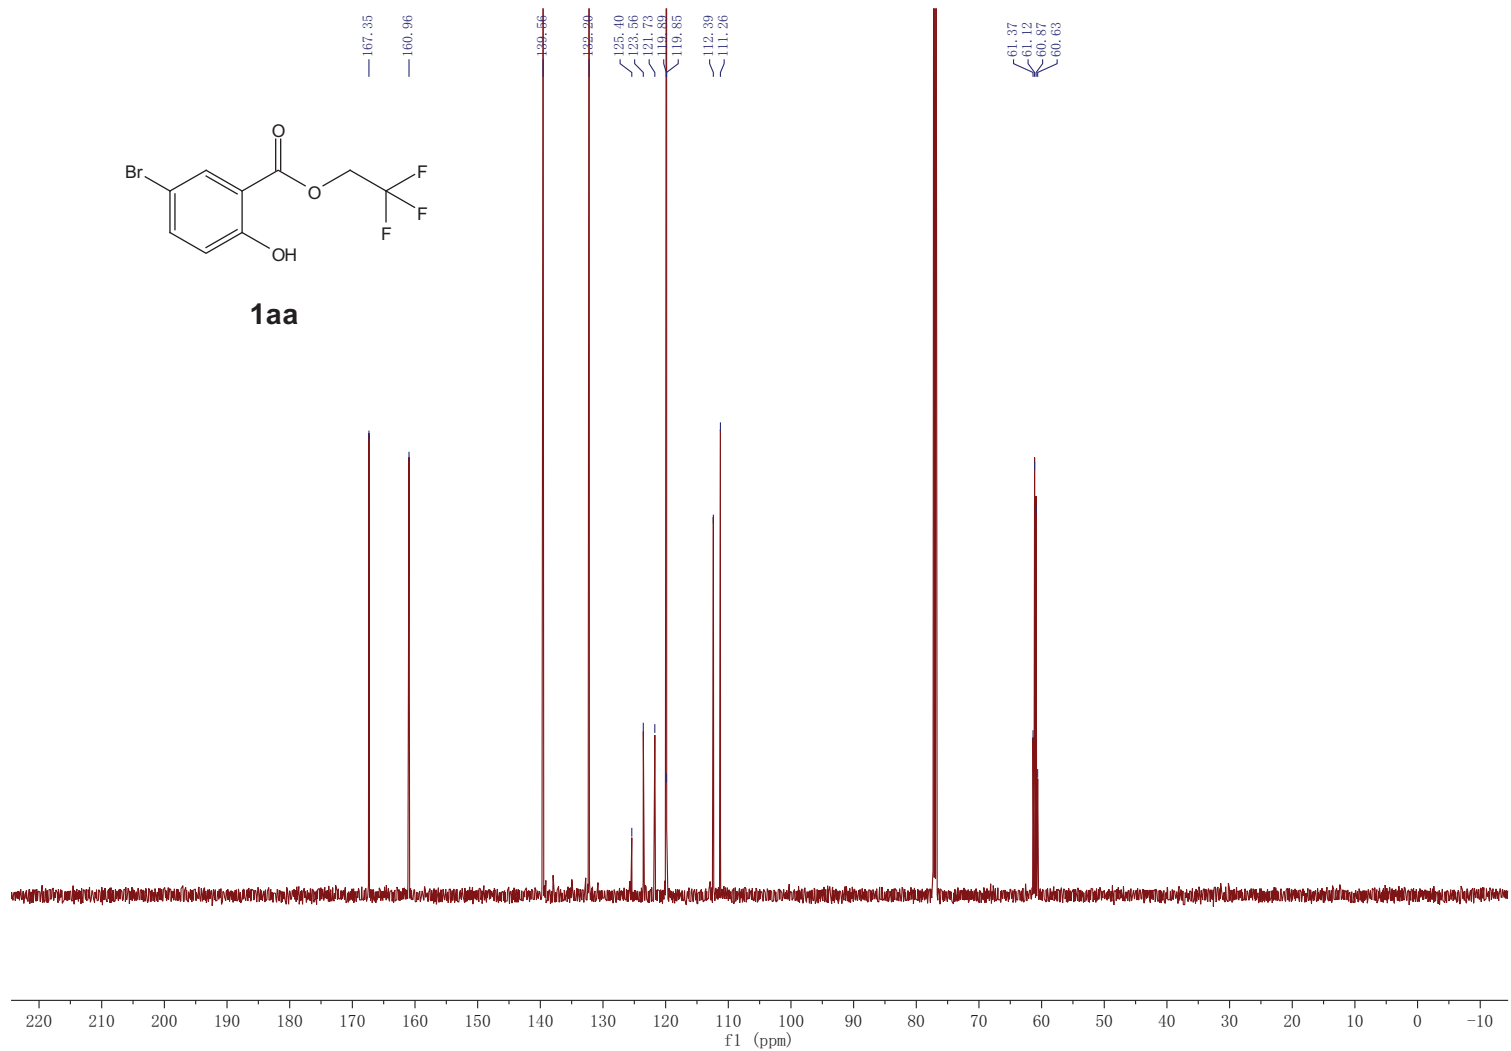

<sup>19</sup>F NMR

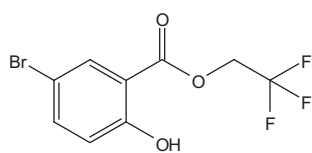

**1aa**

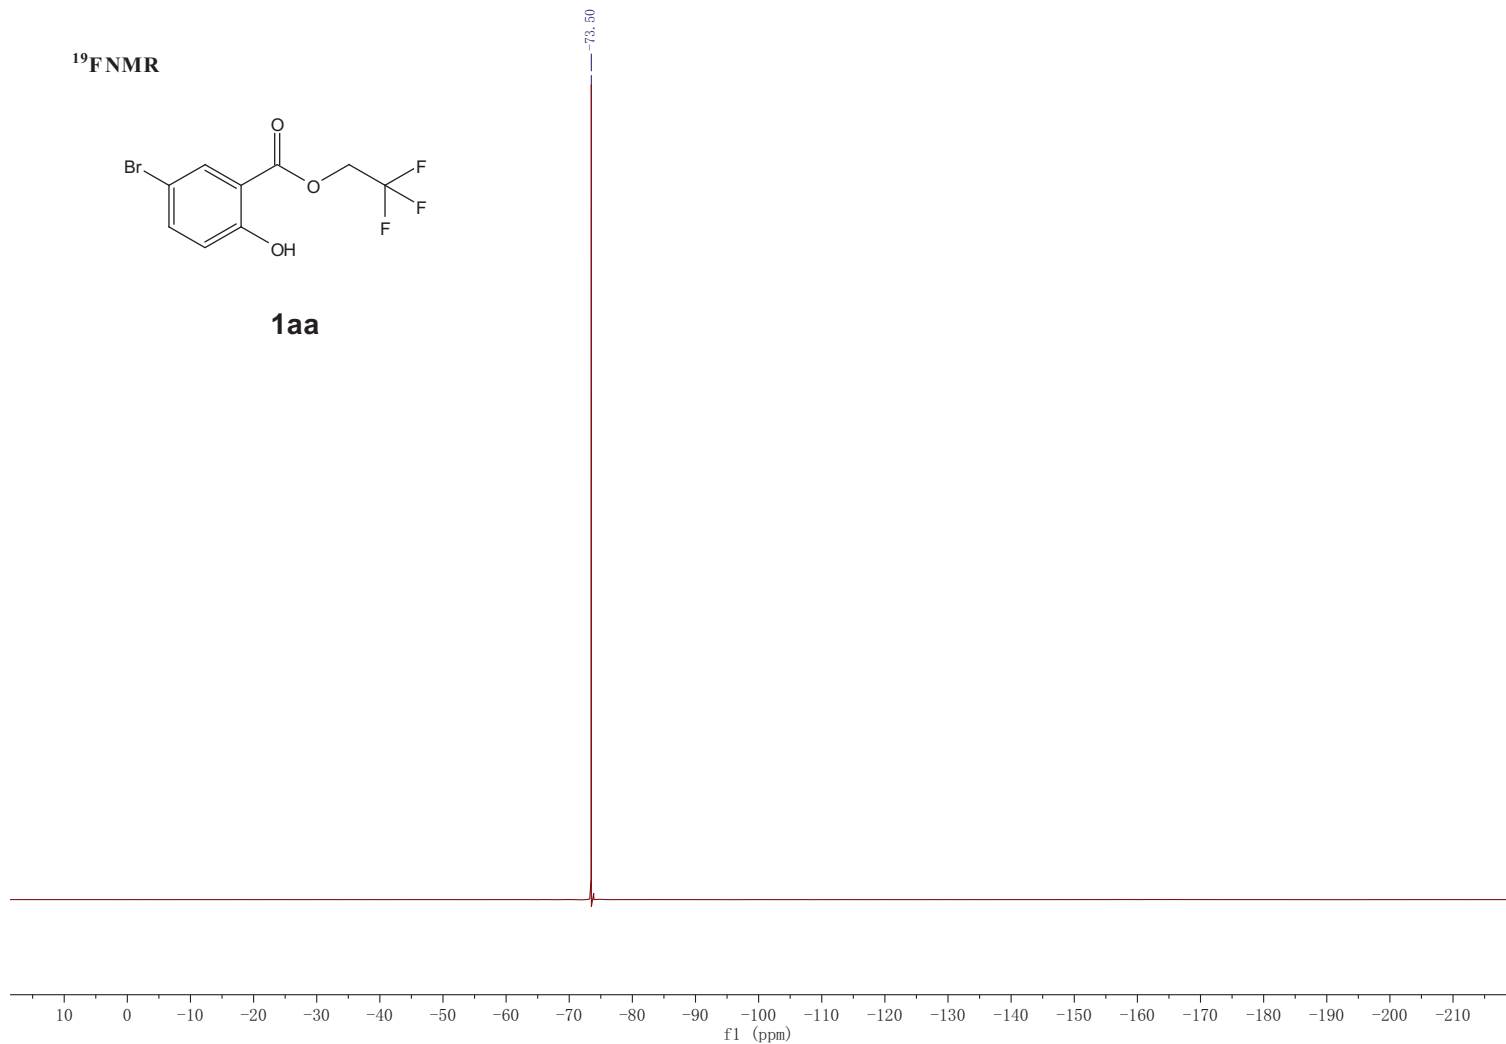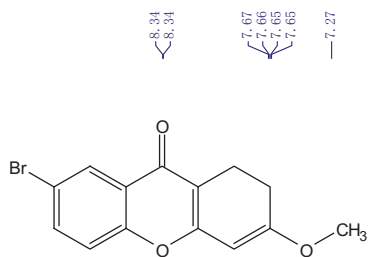

**3aa**

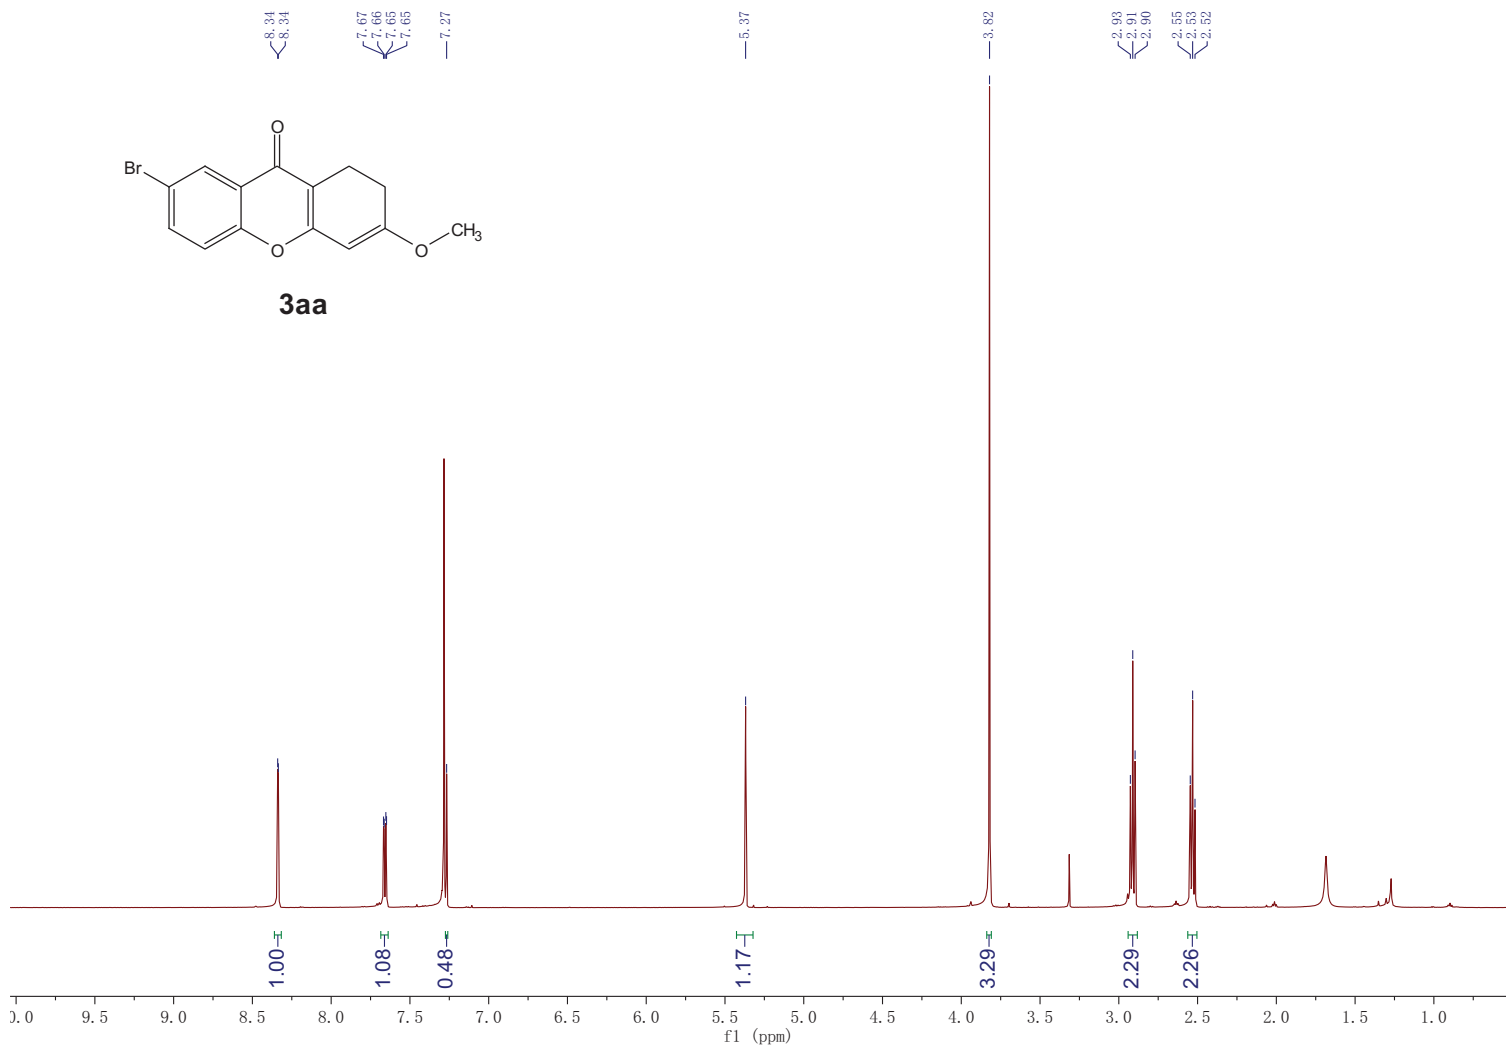



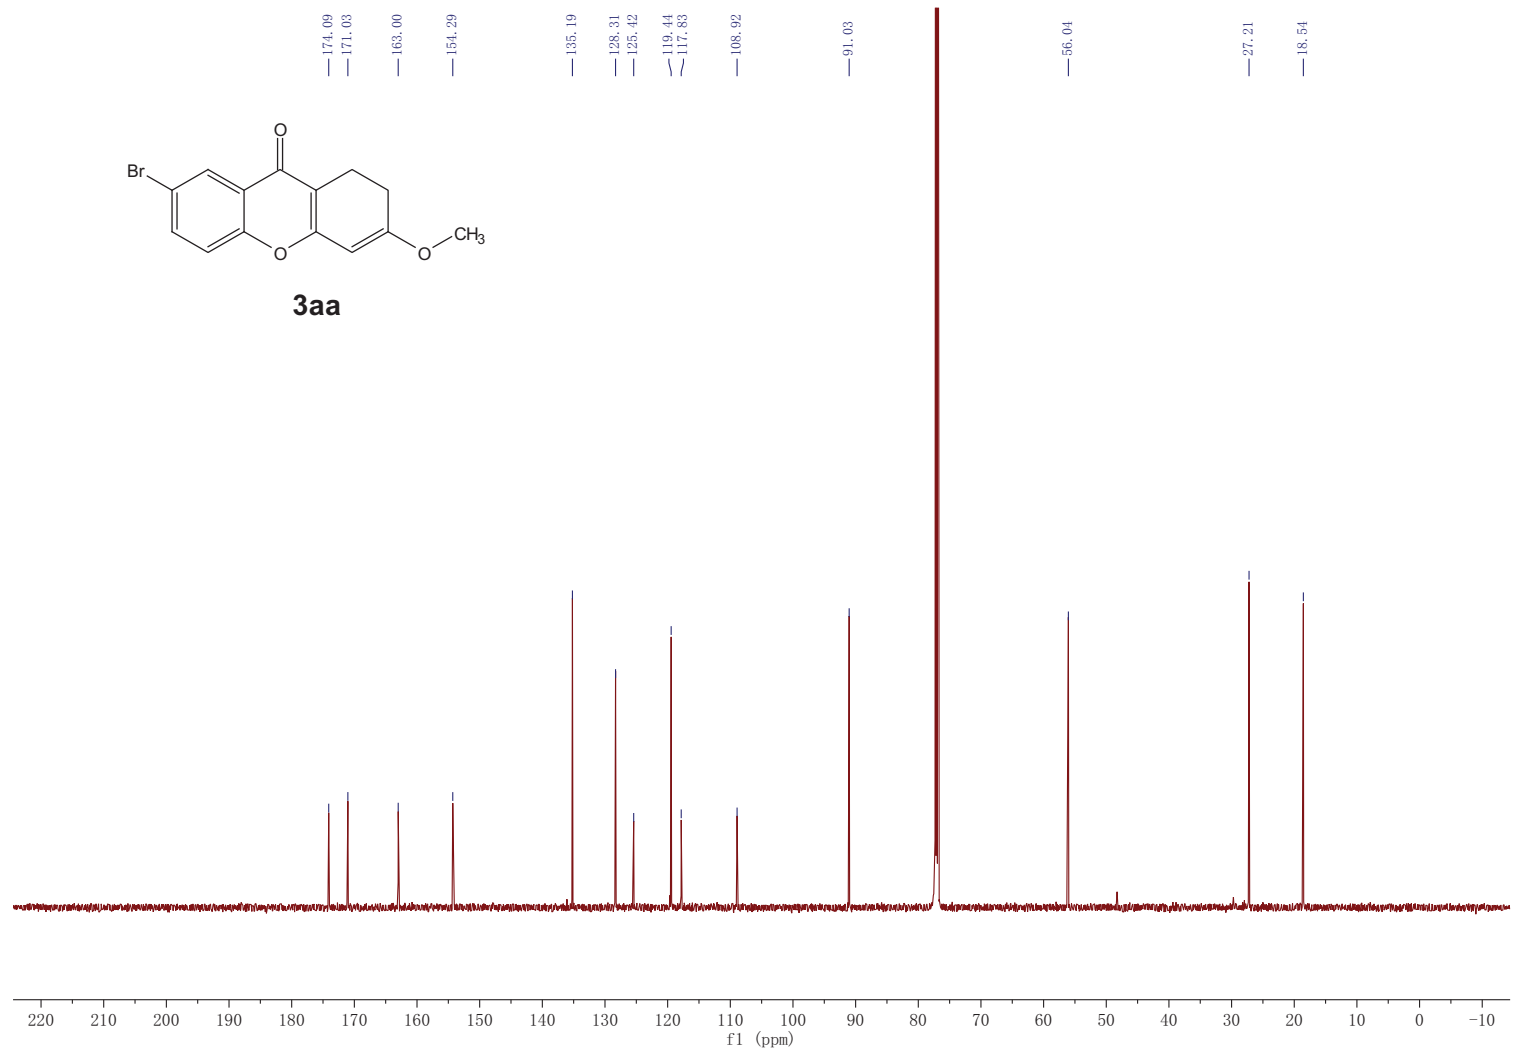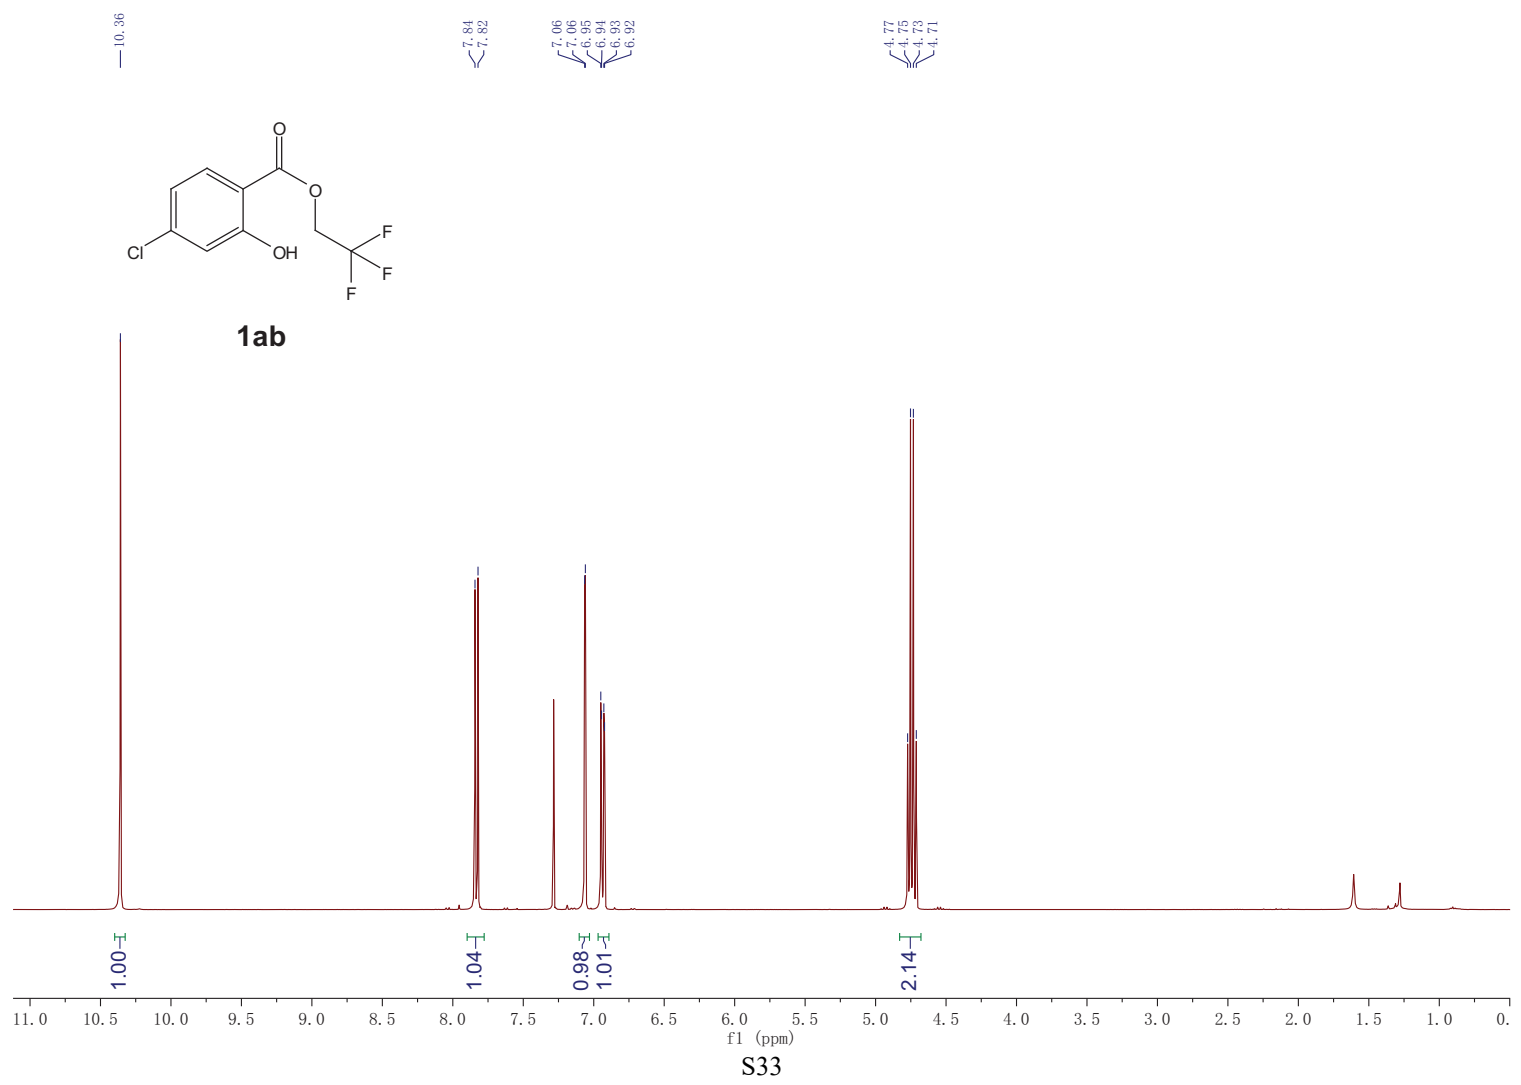

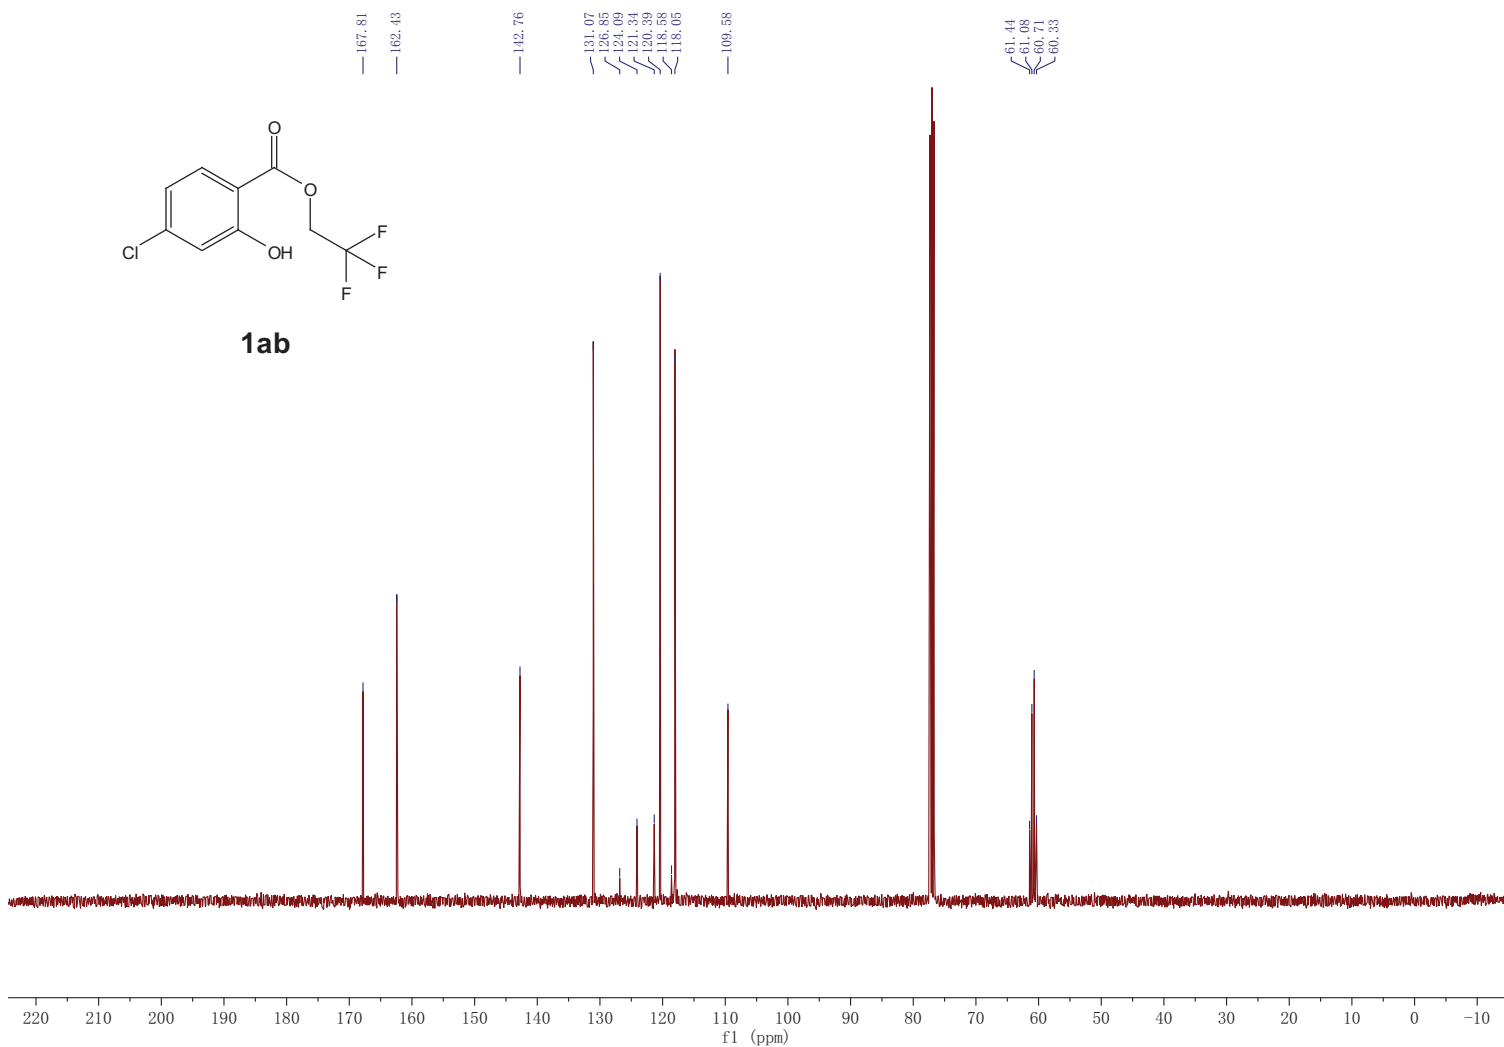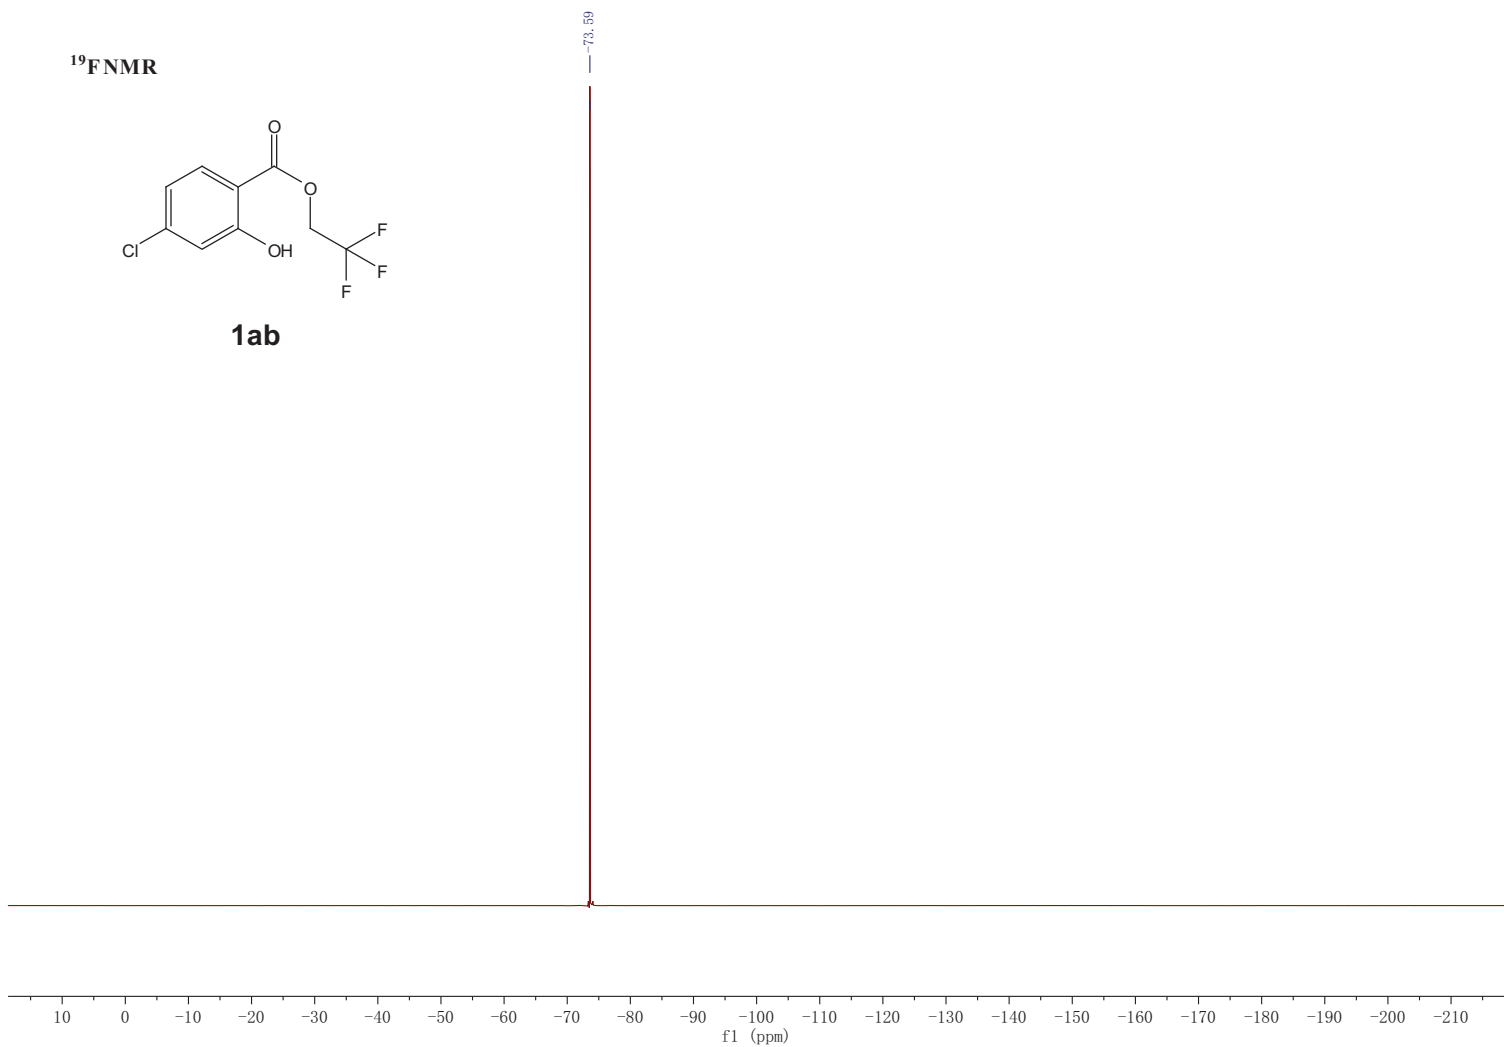

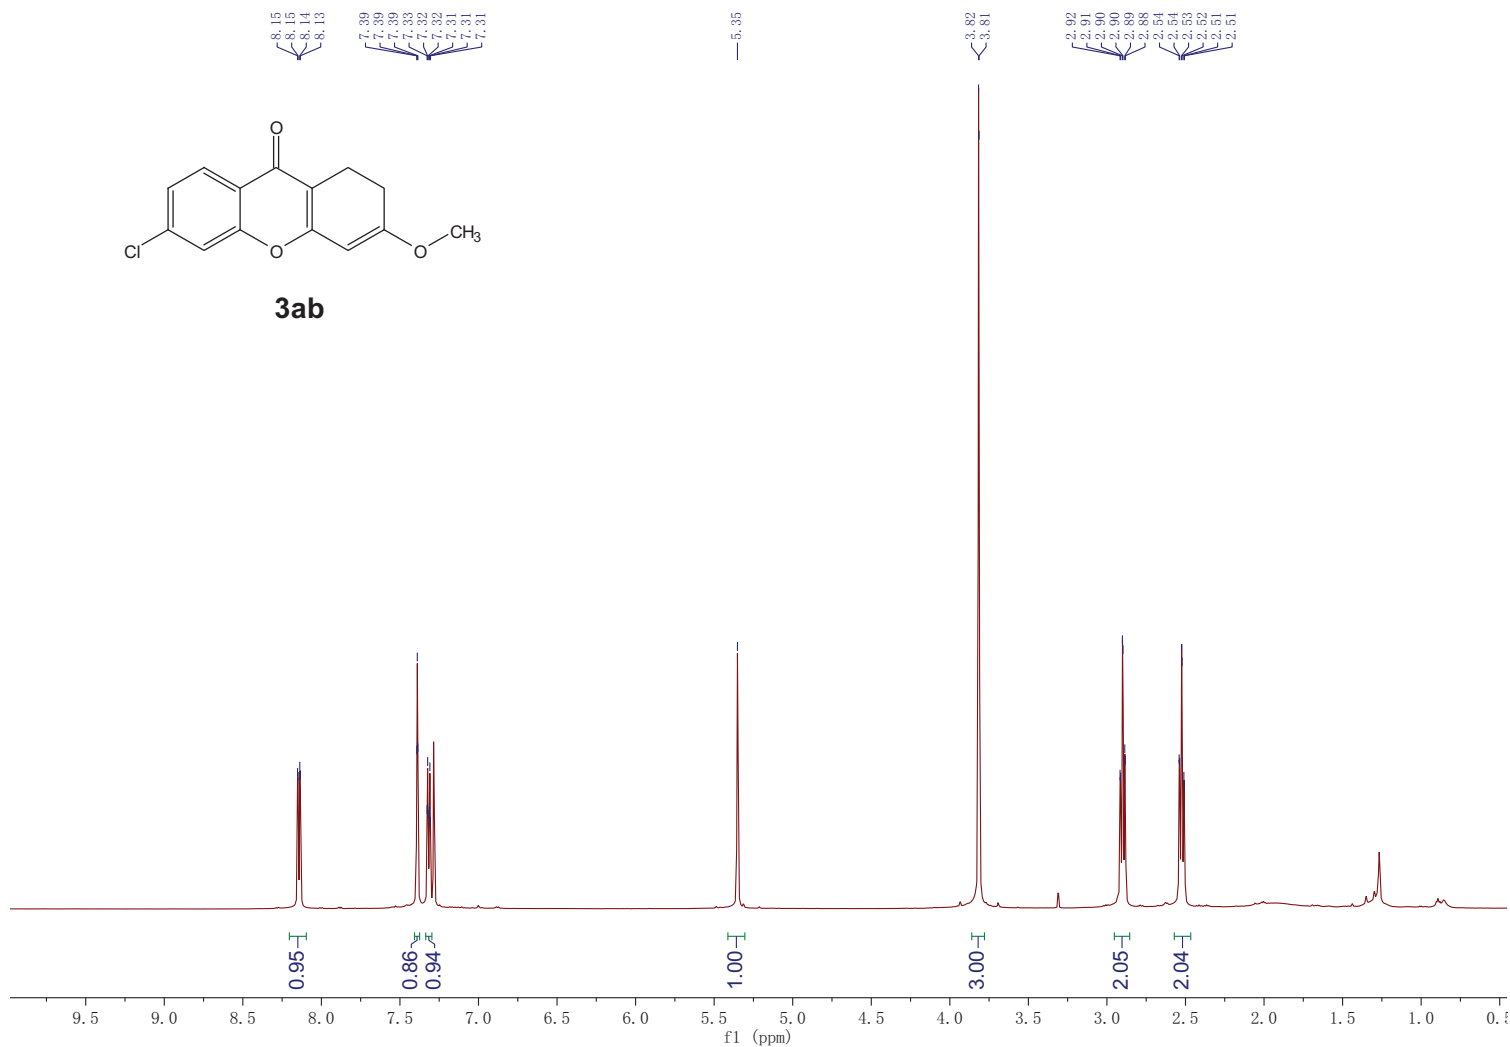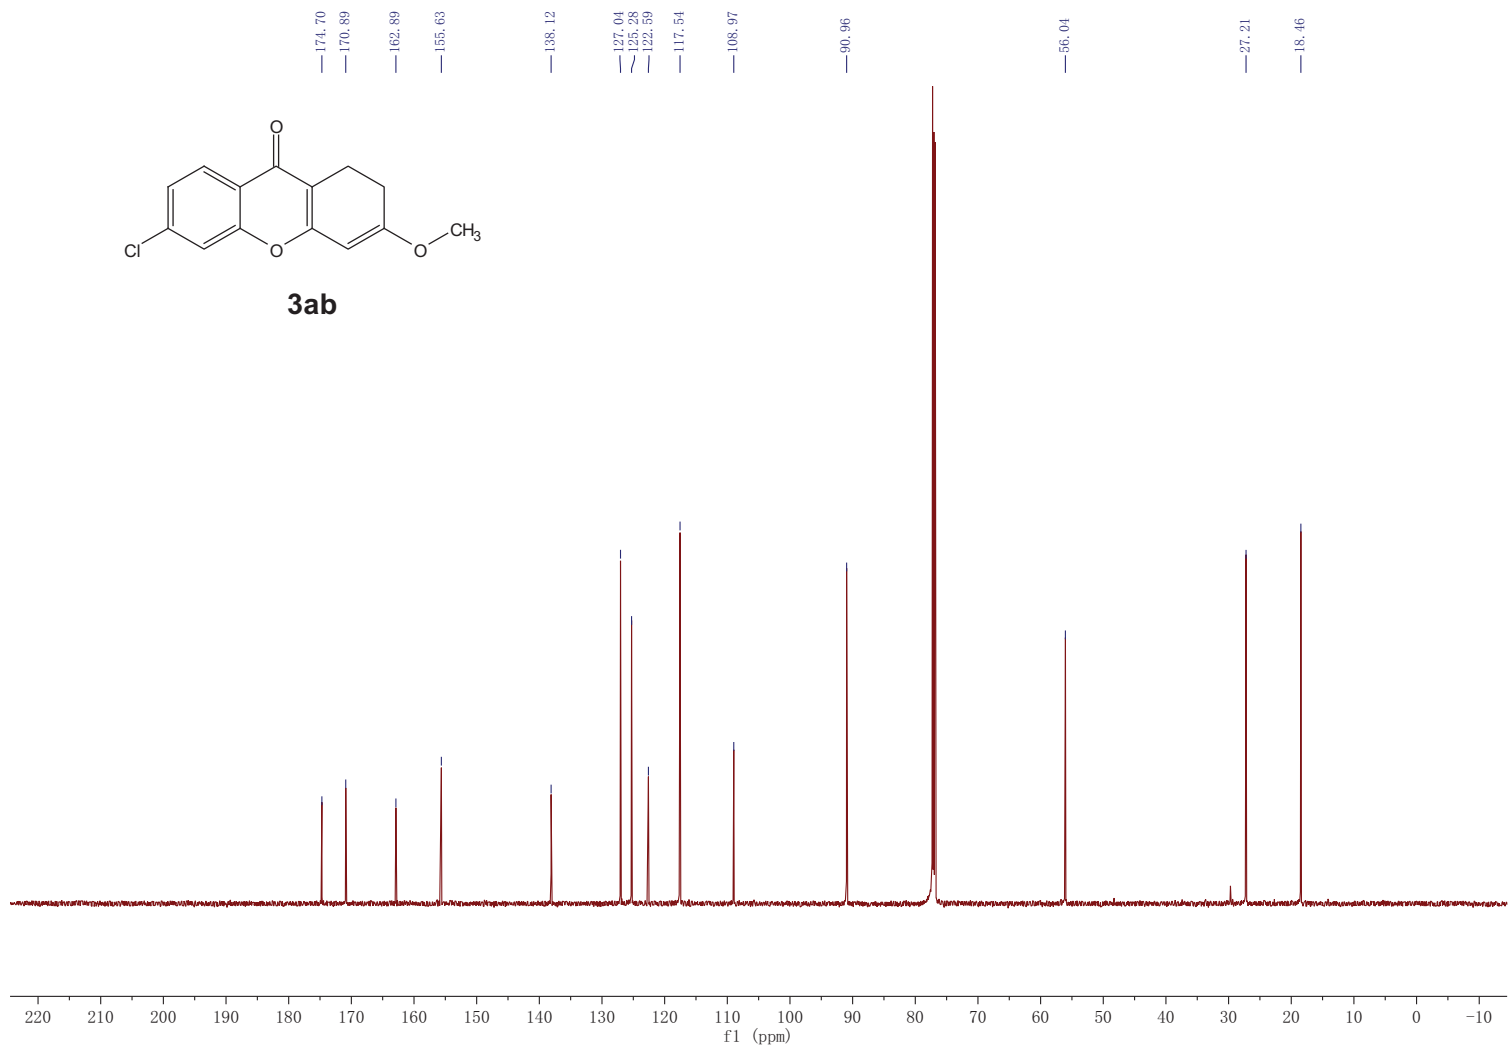

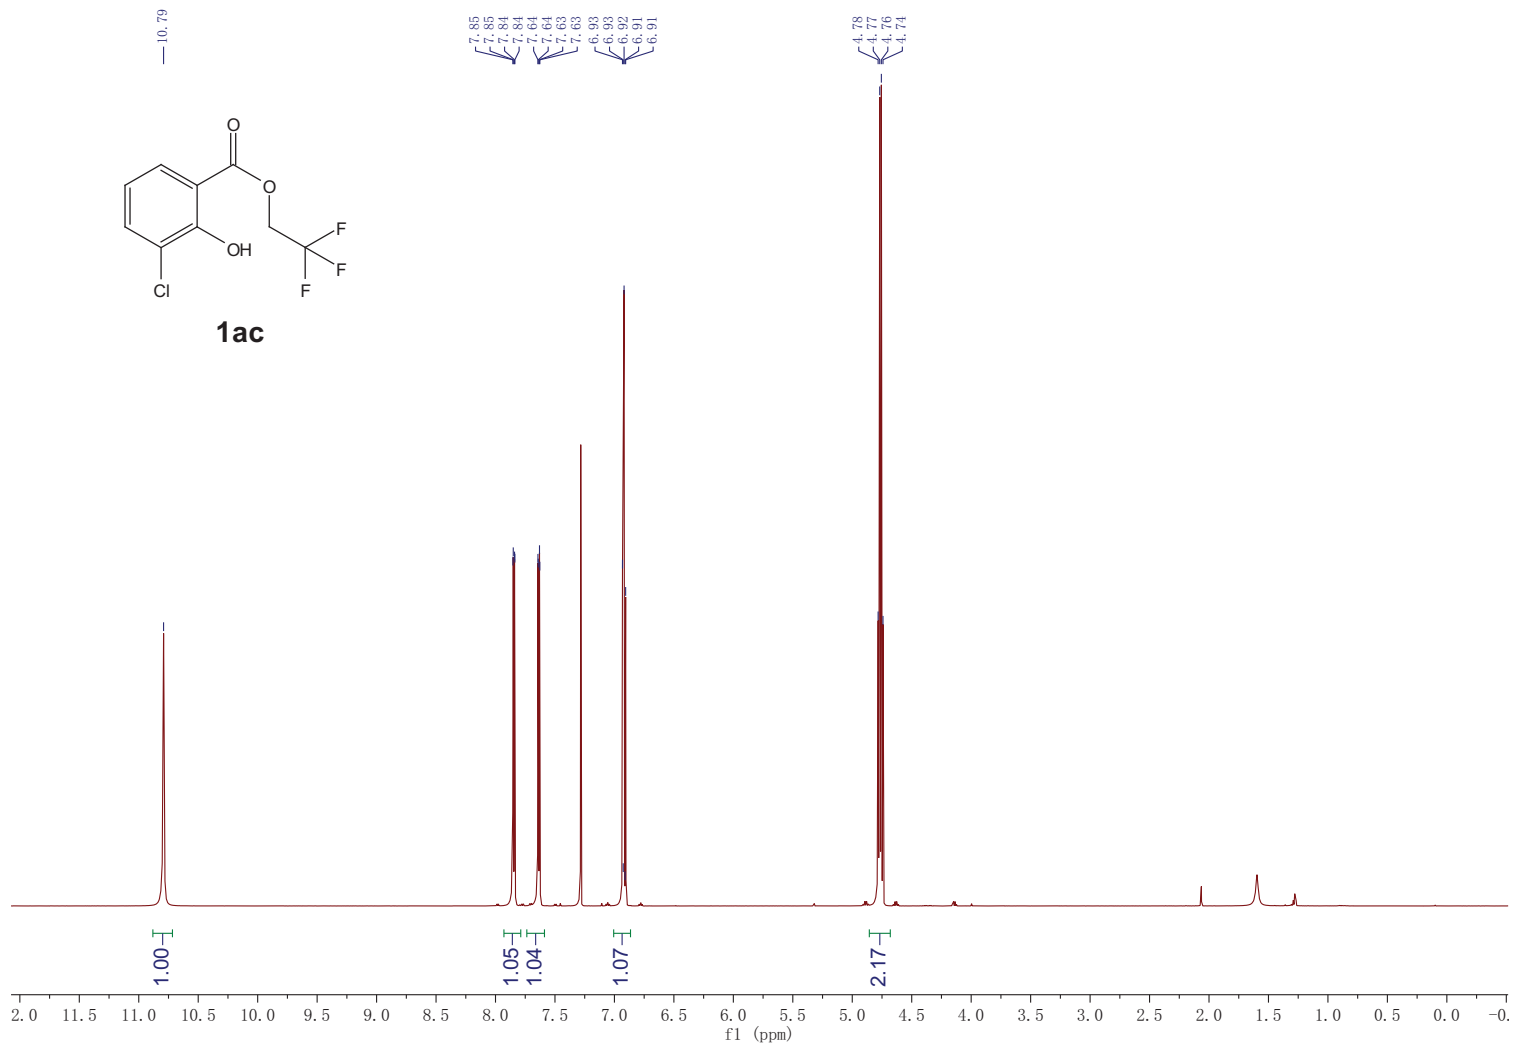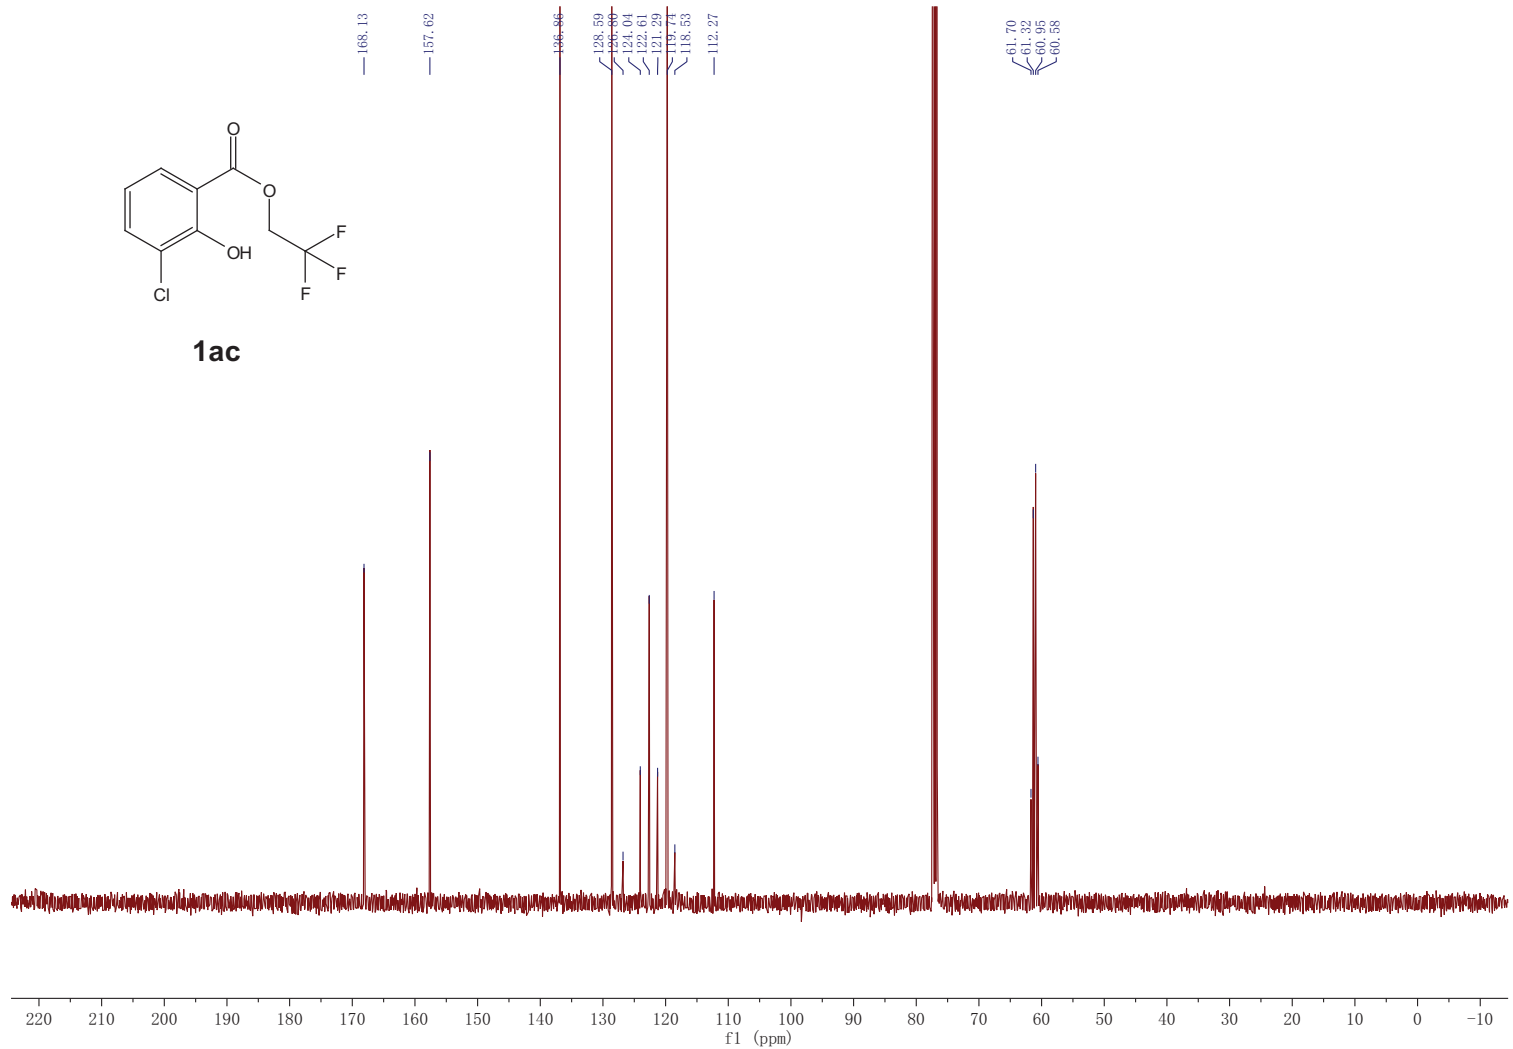

<sup>19</sup>F NMR

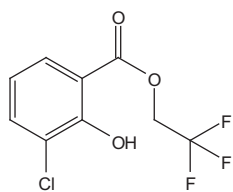

**1ac**

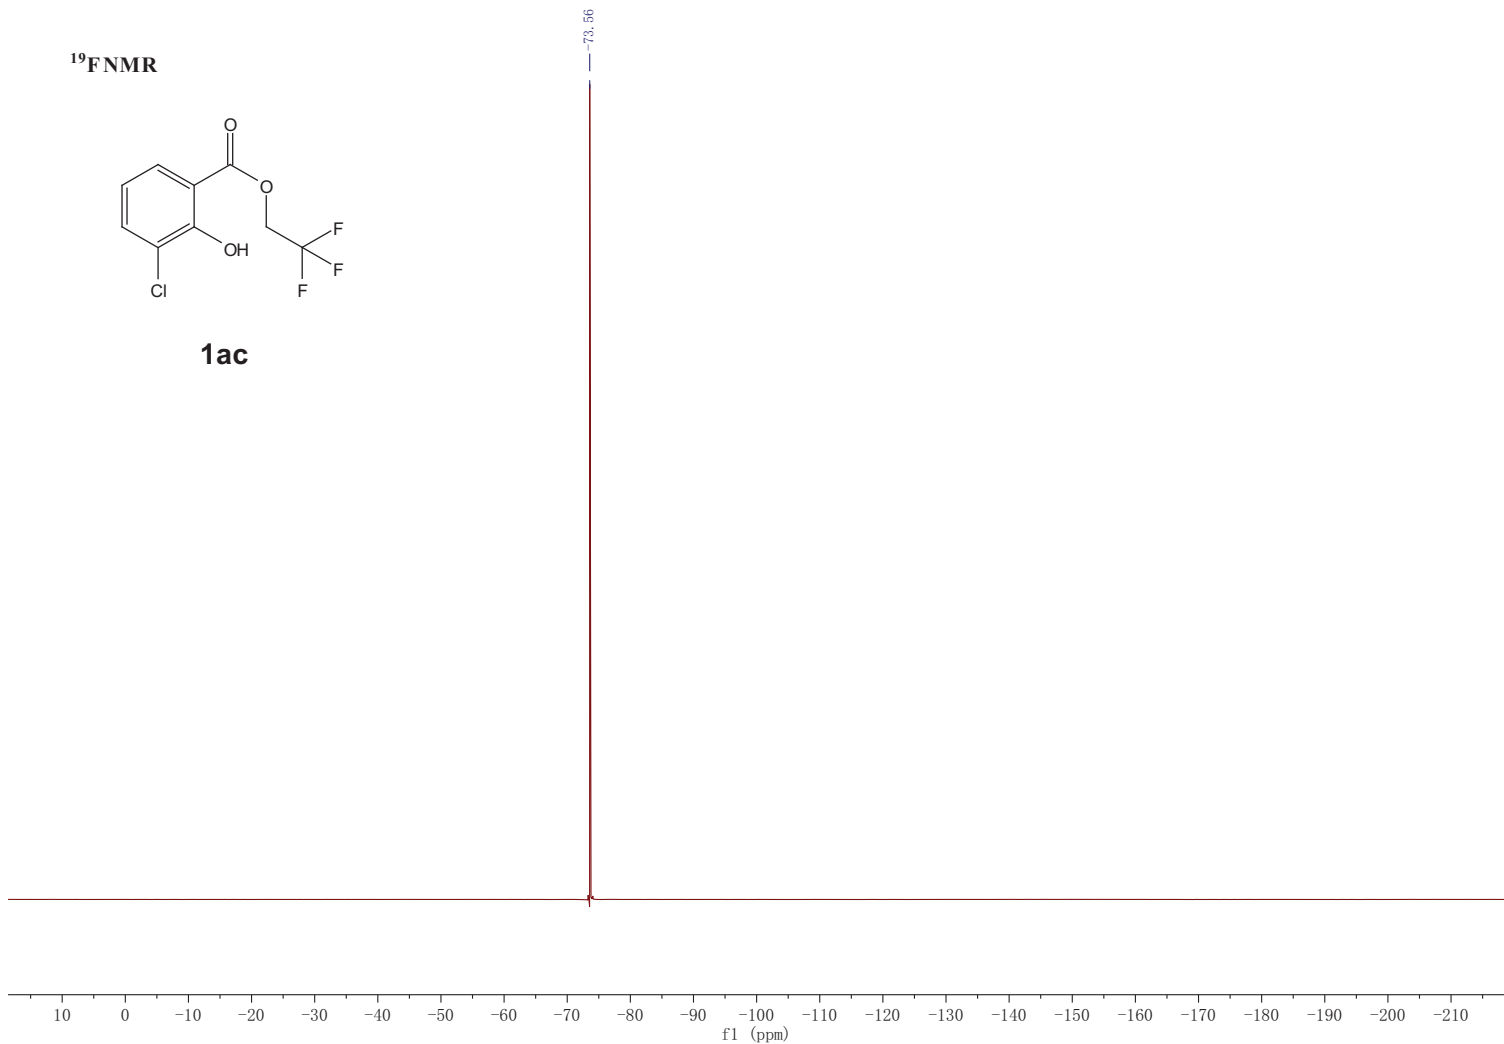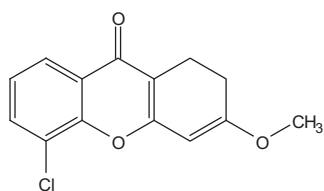

**3ac**

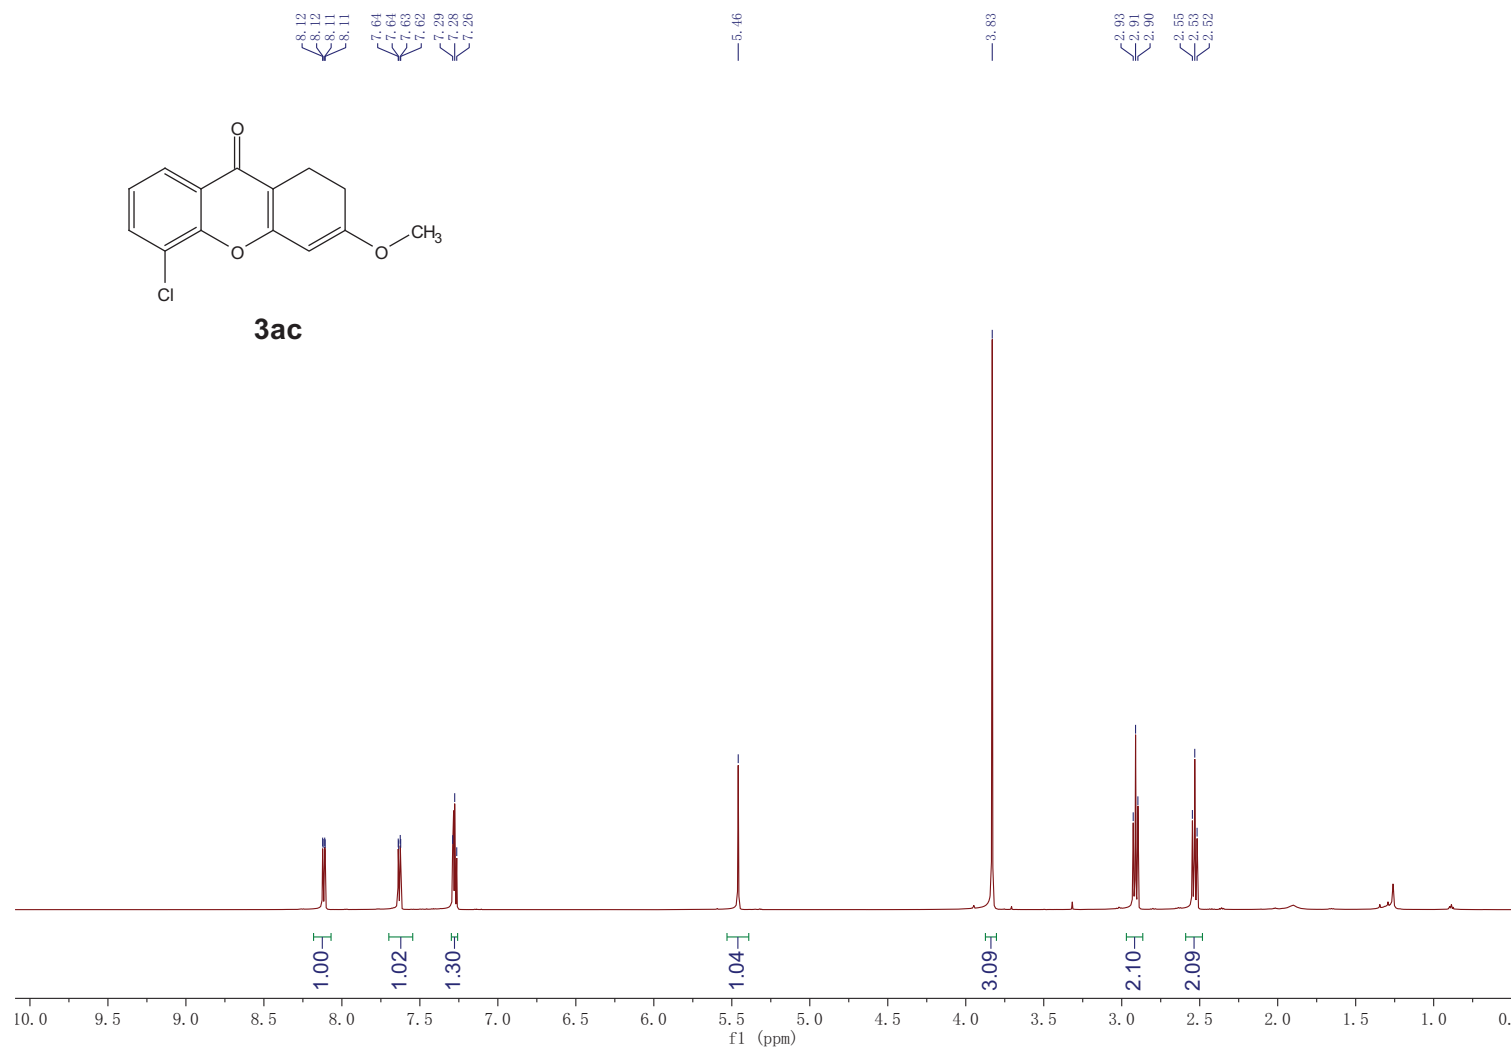

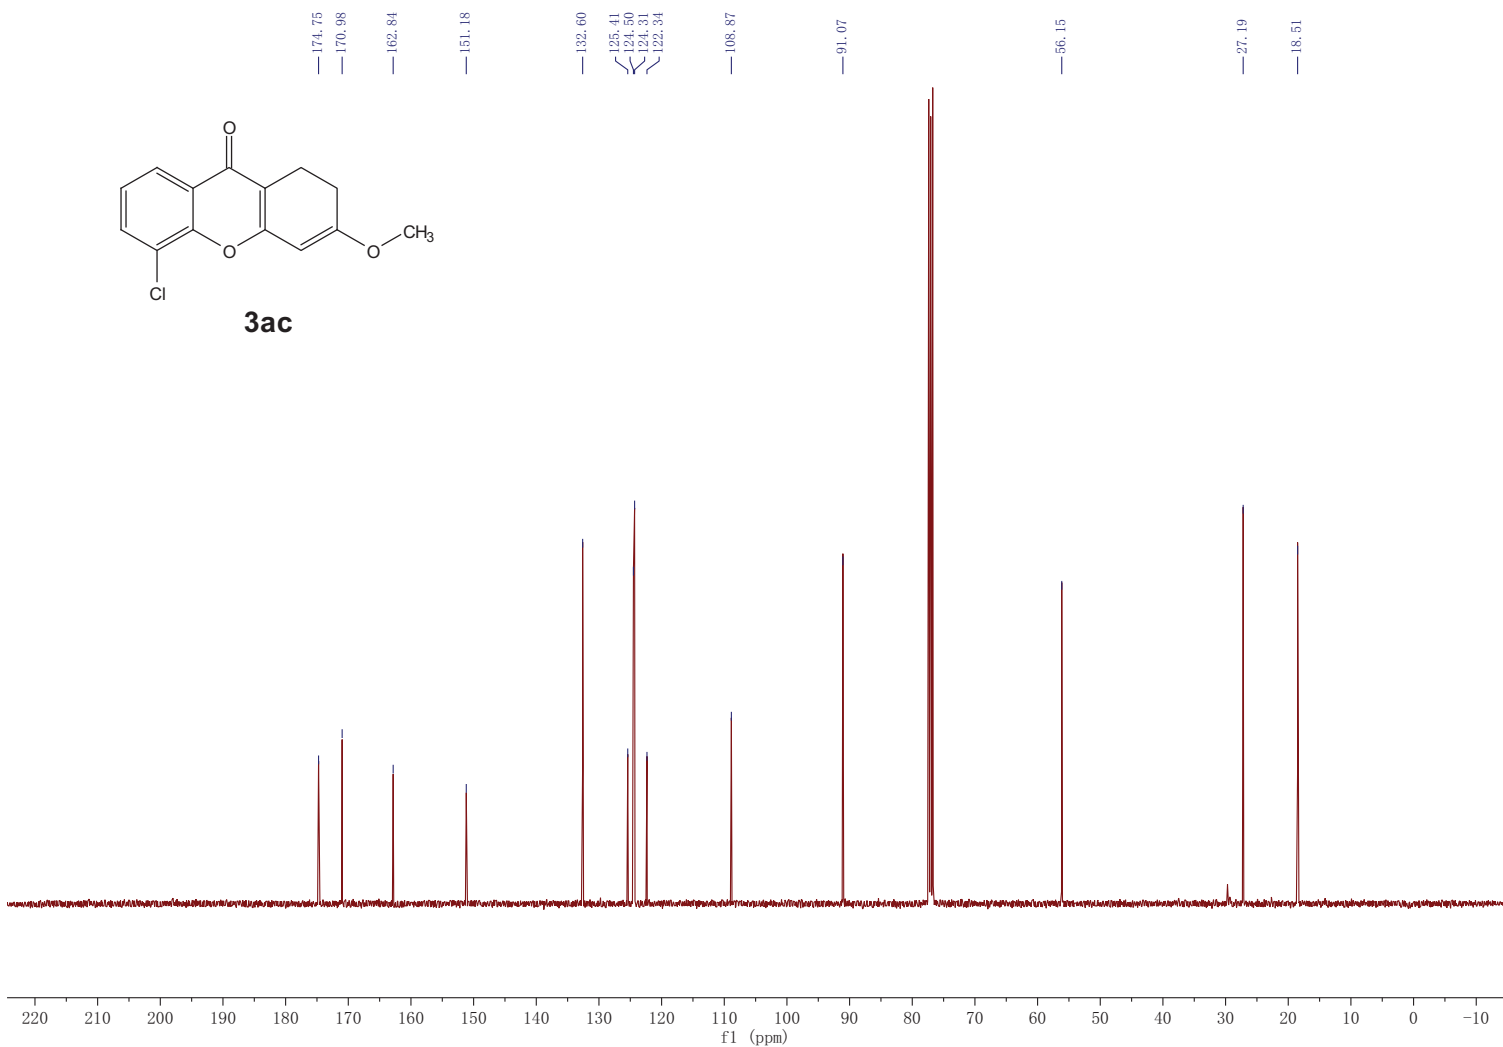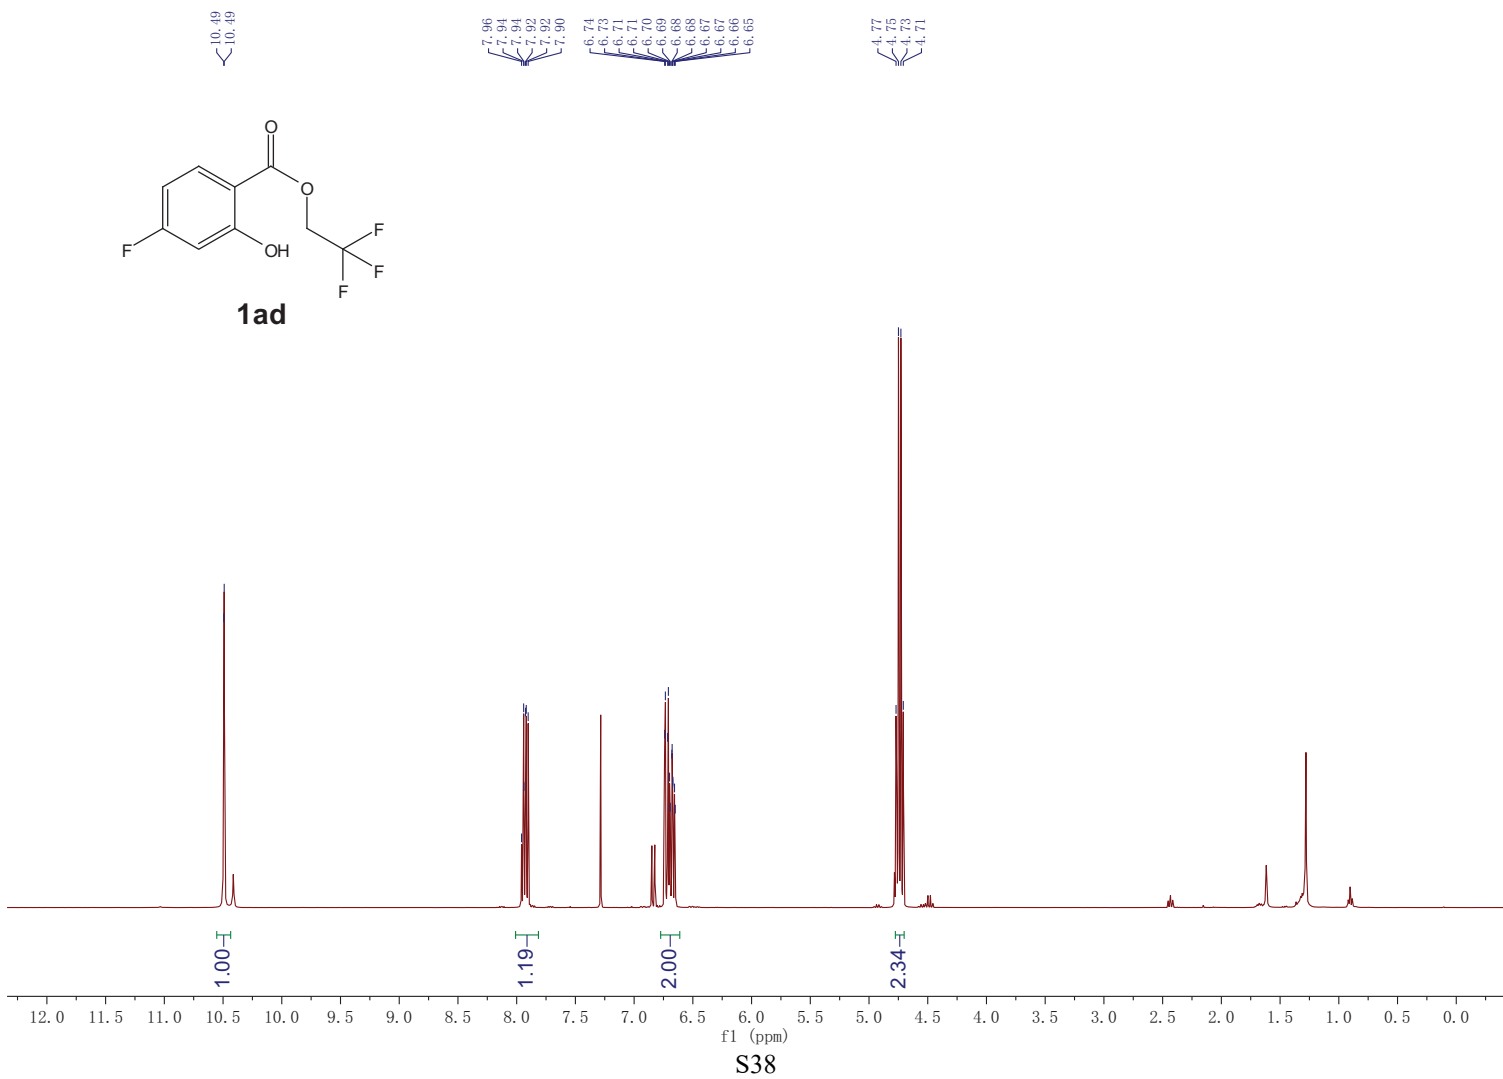

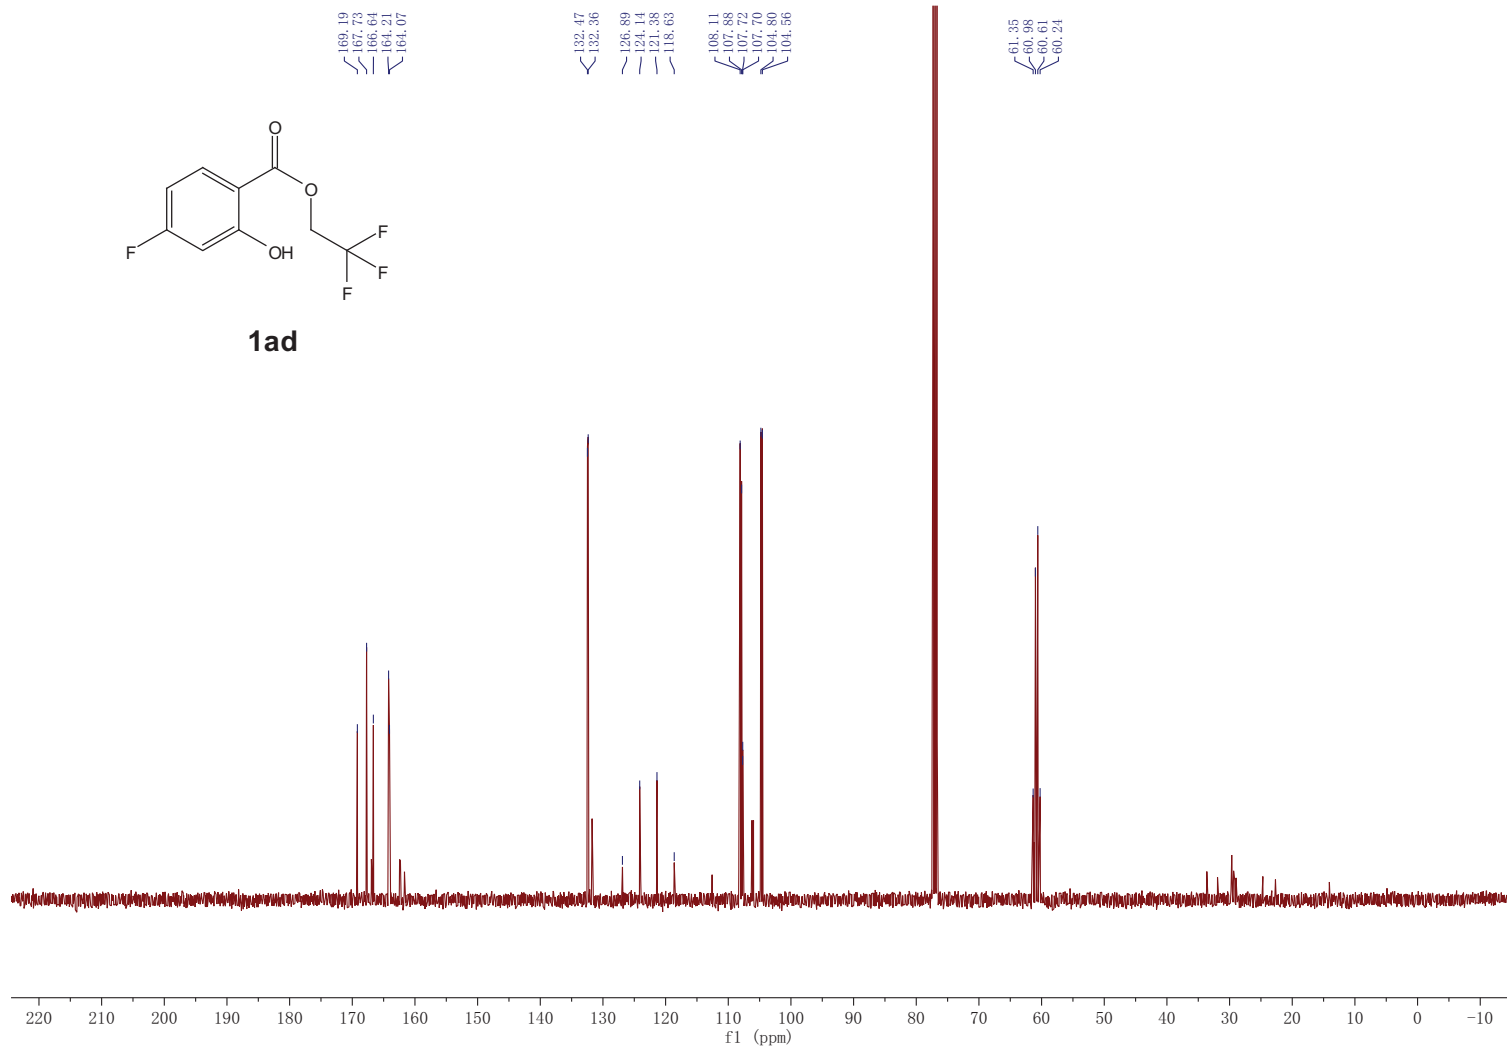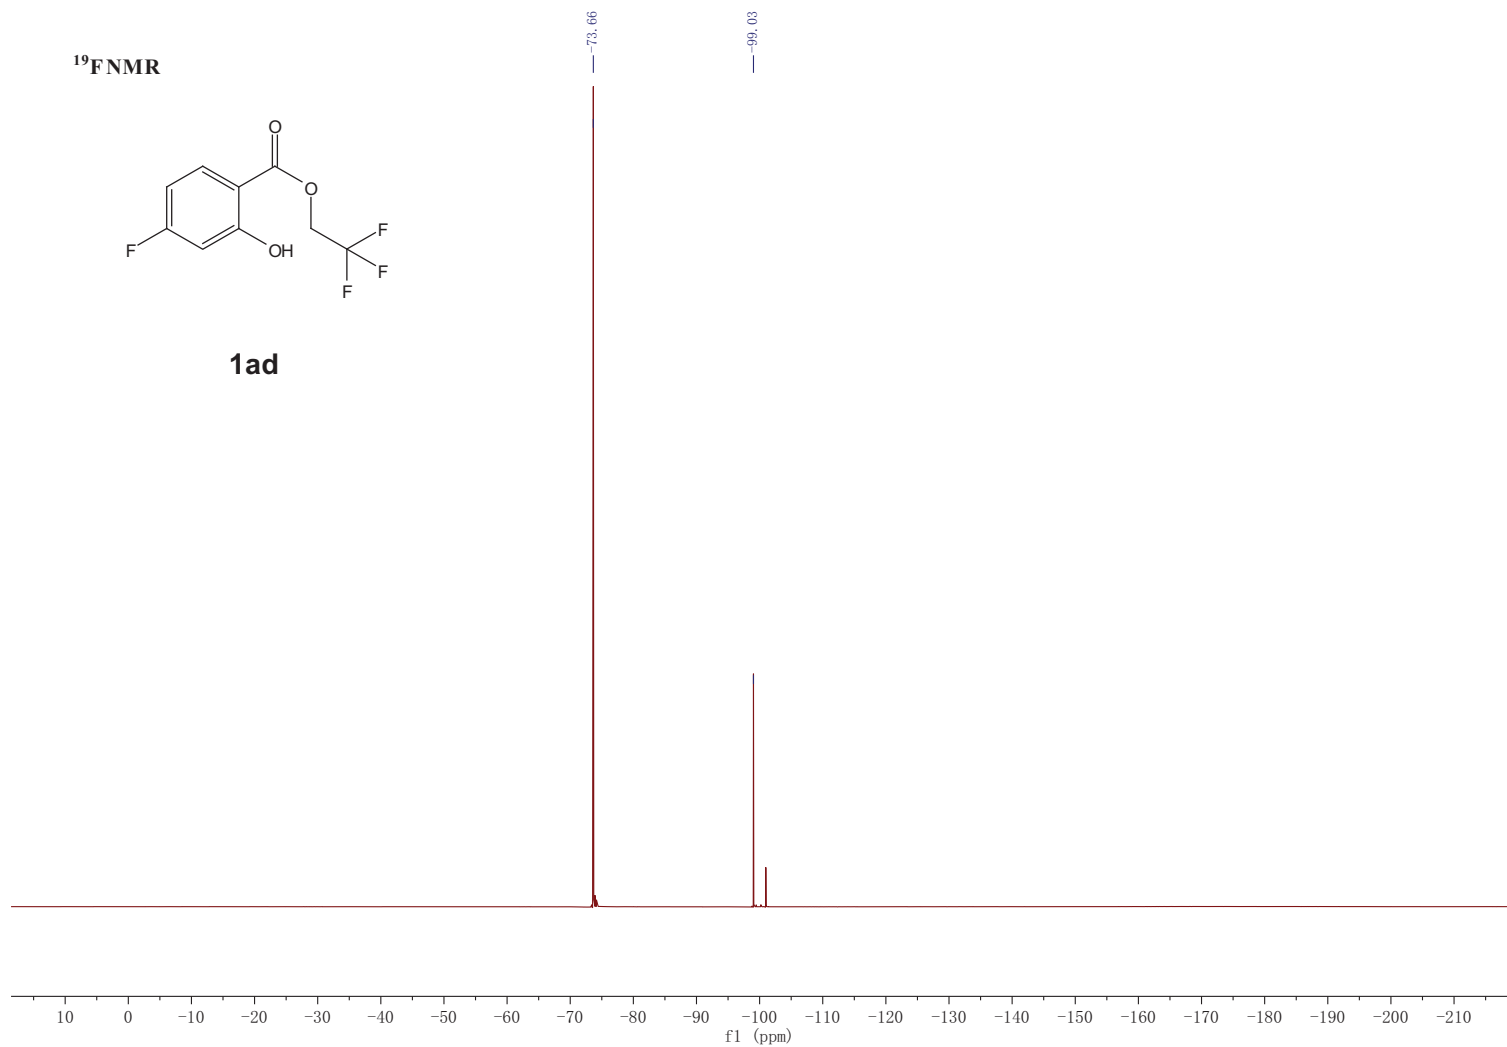

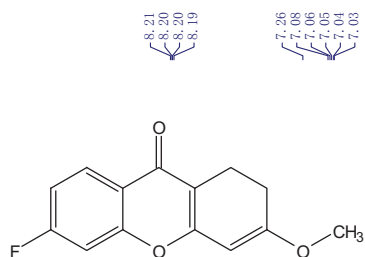

3ad

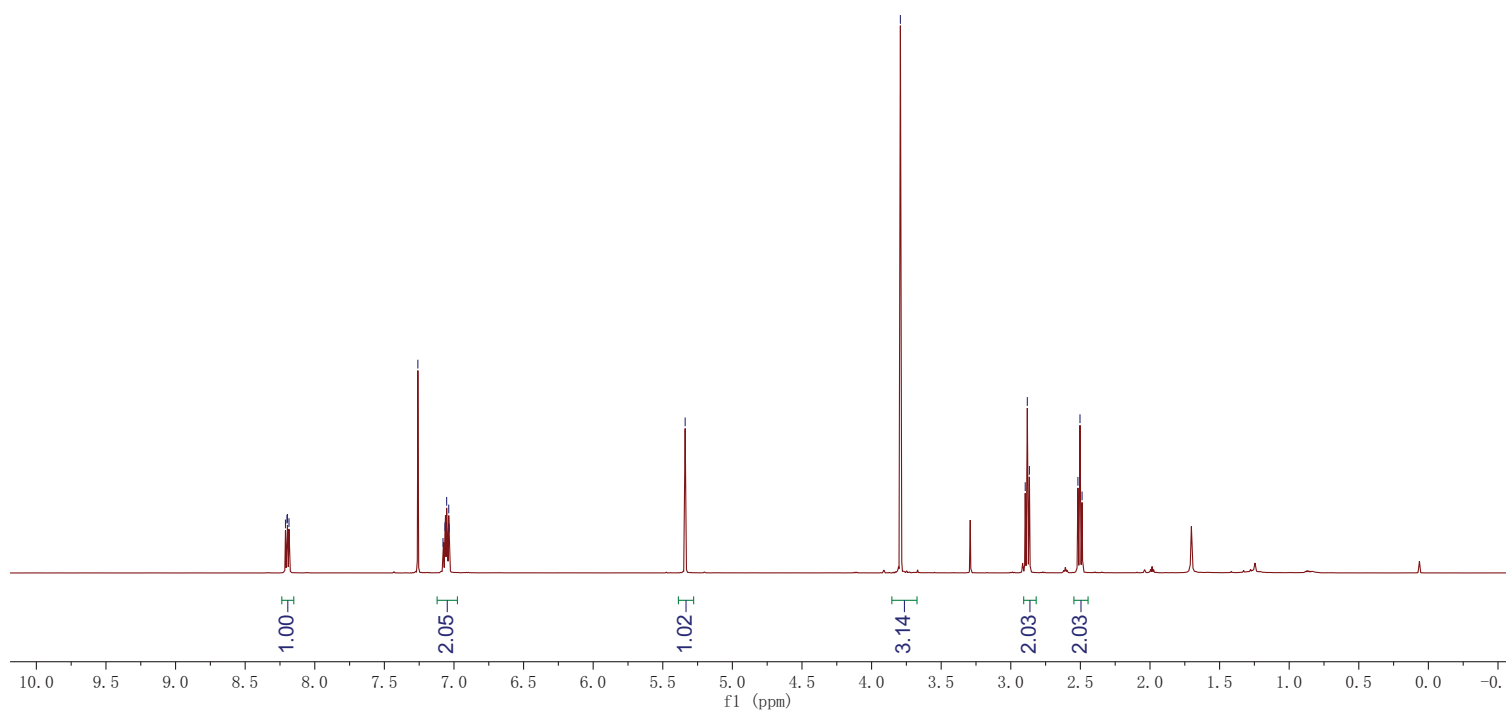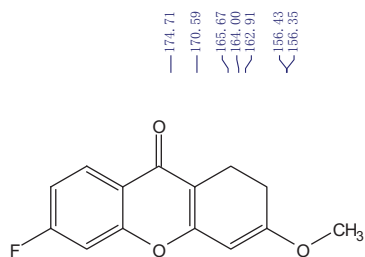

3ad

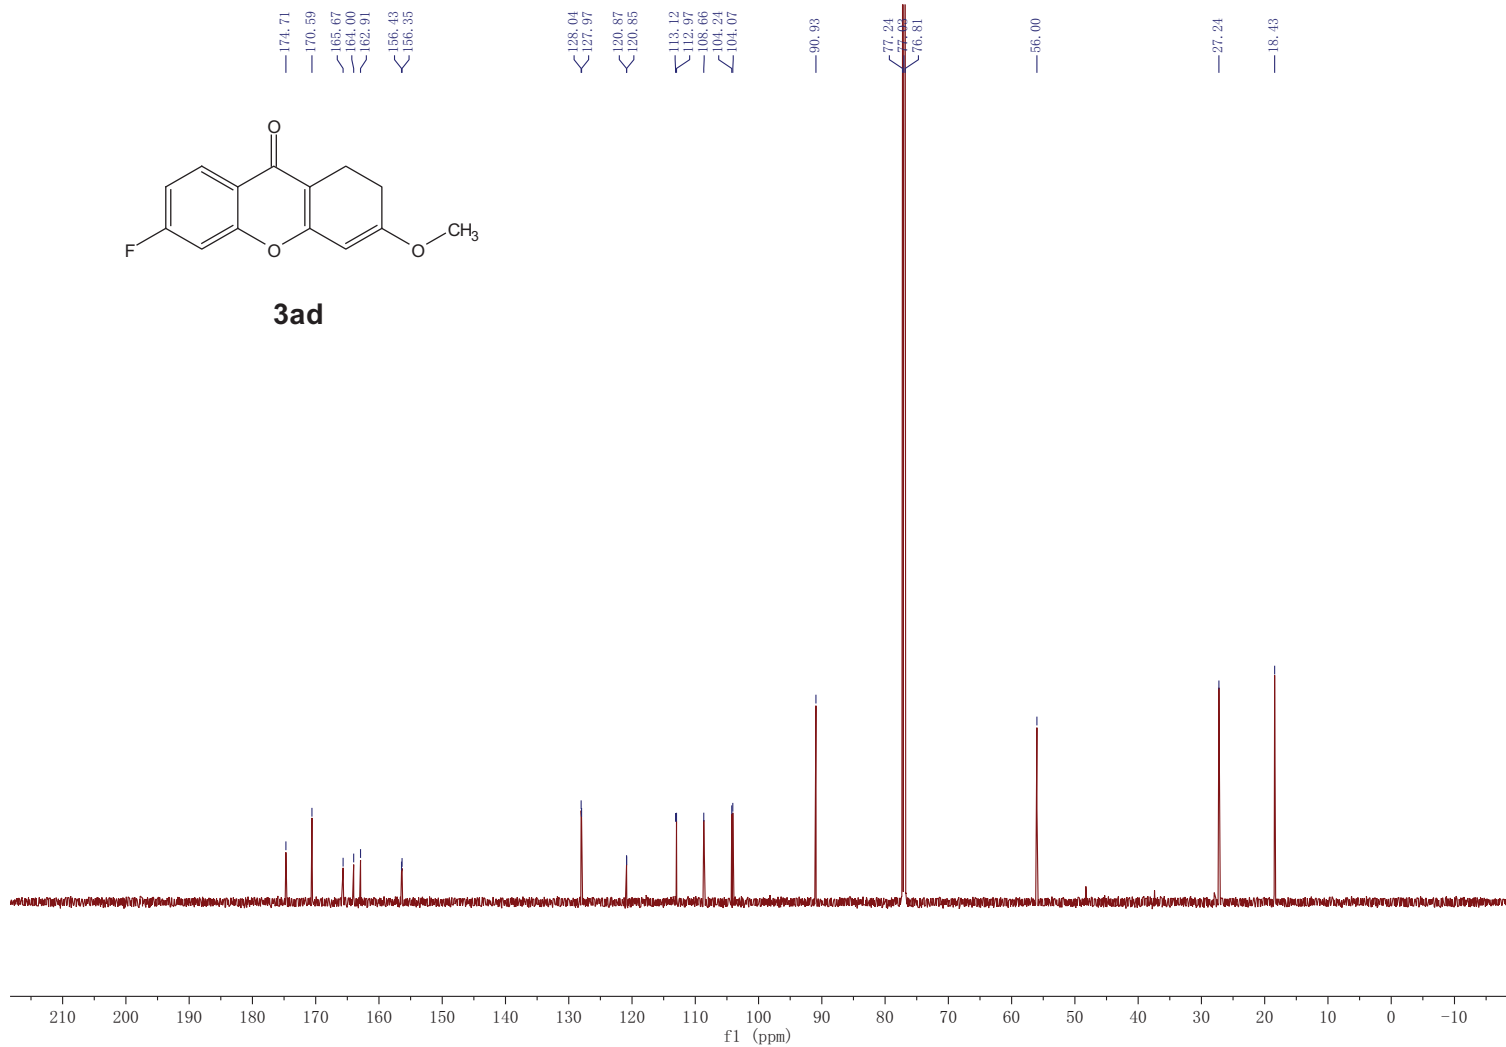



<sup>19</sup>F NMR

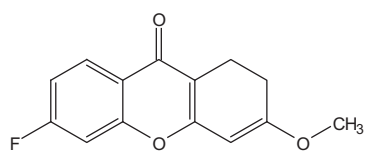

**3ad**

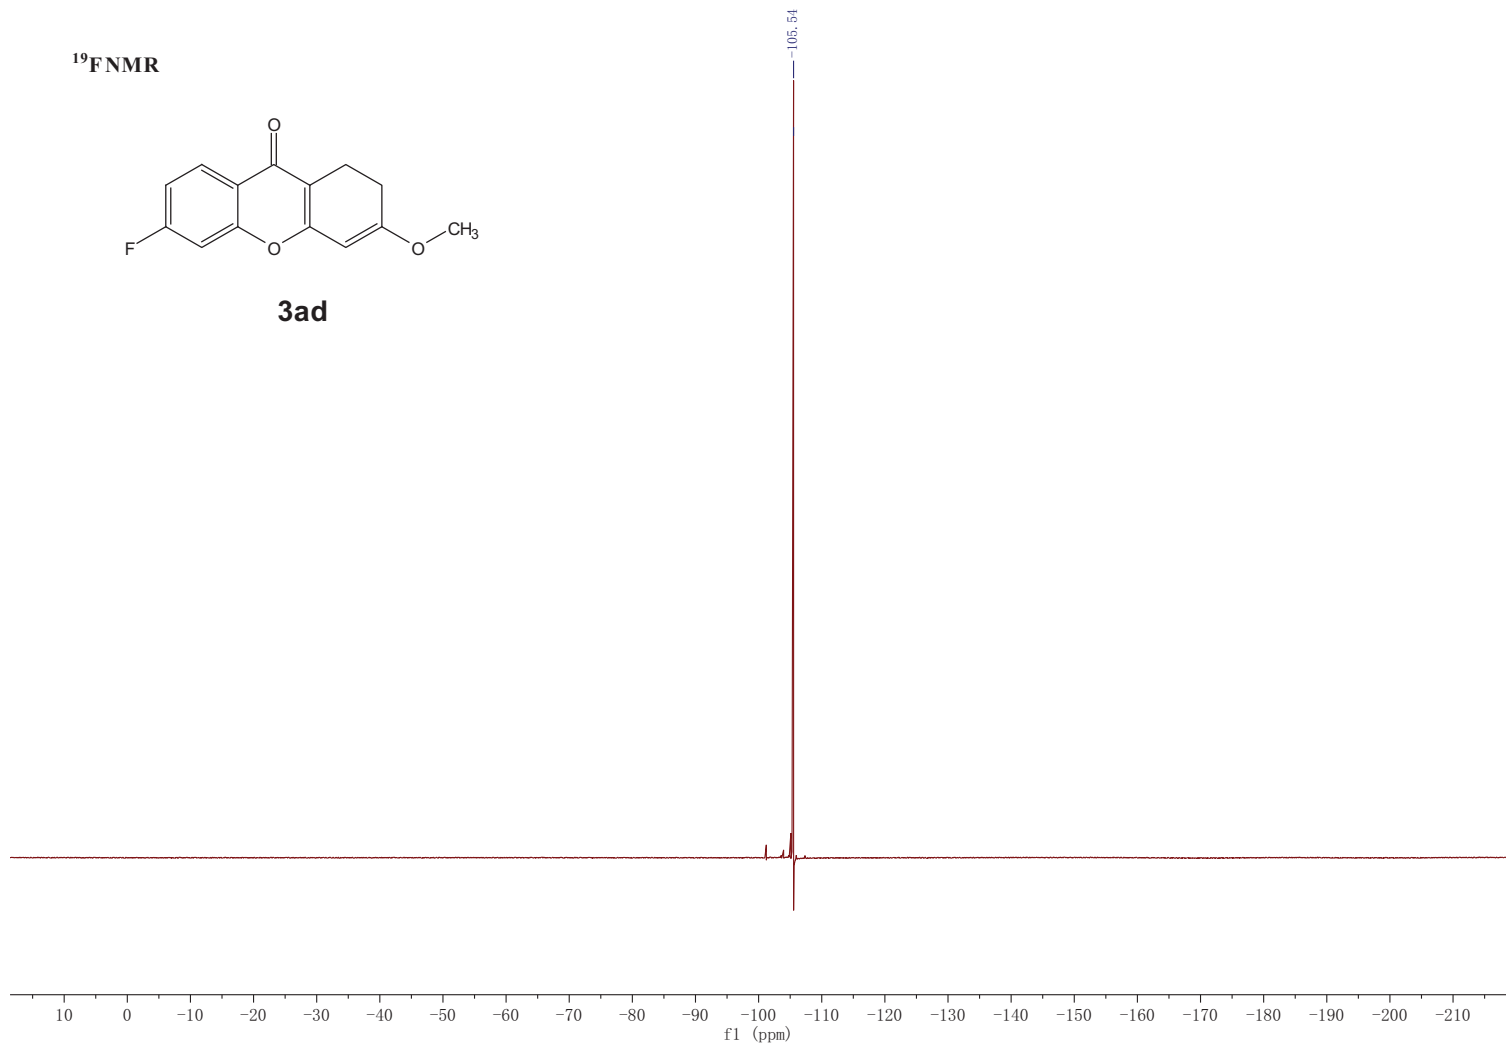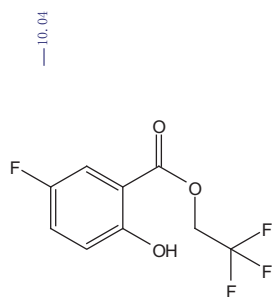

**1ae**

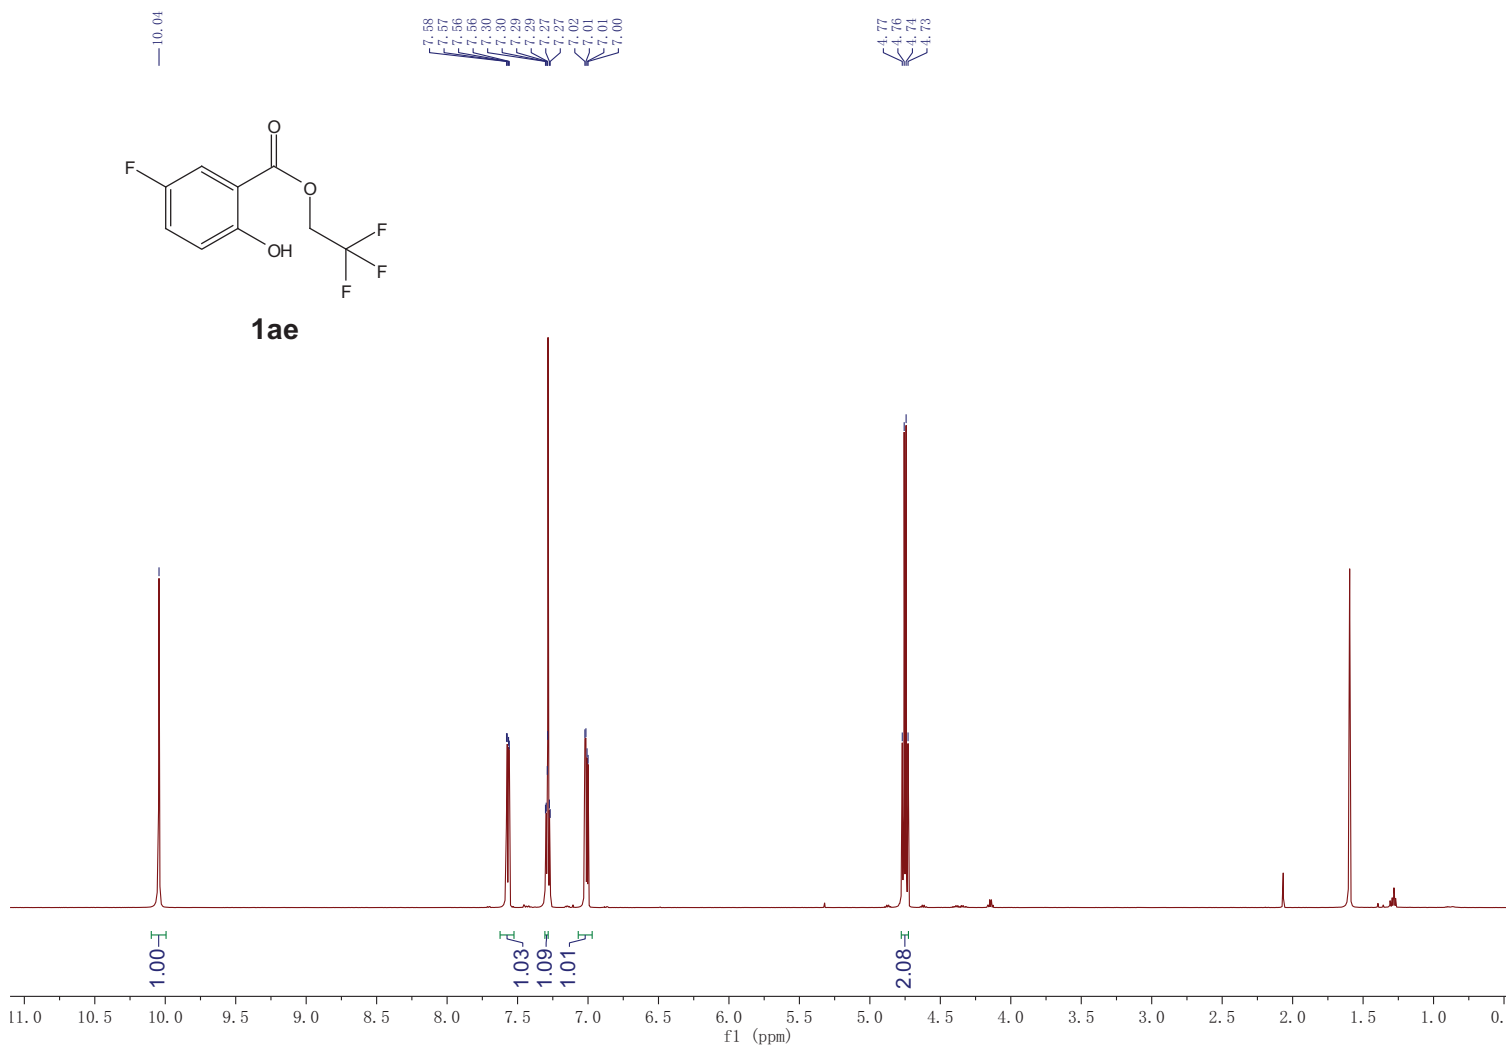

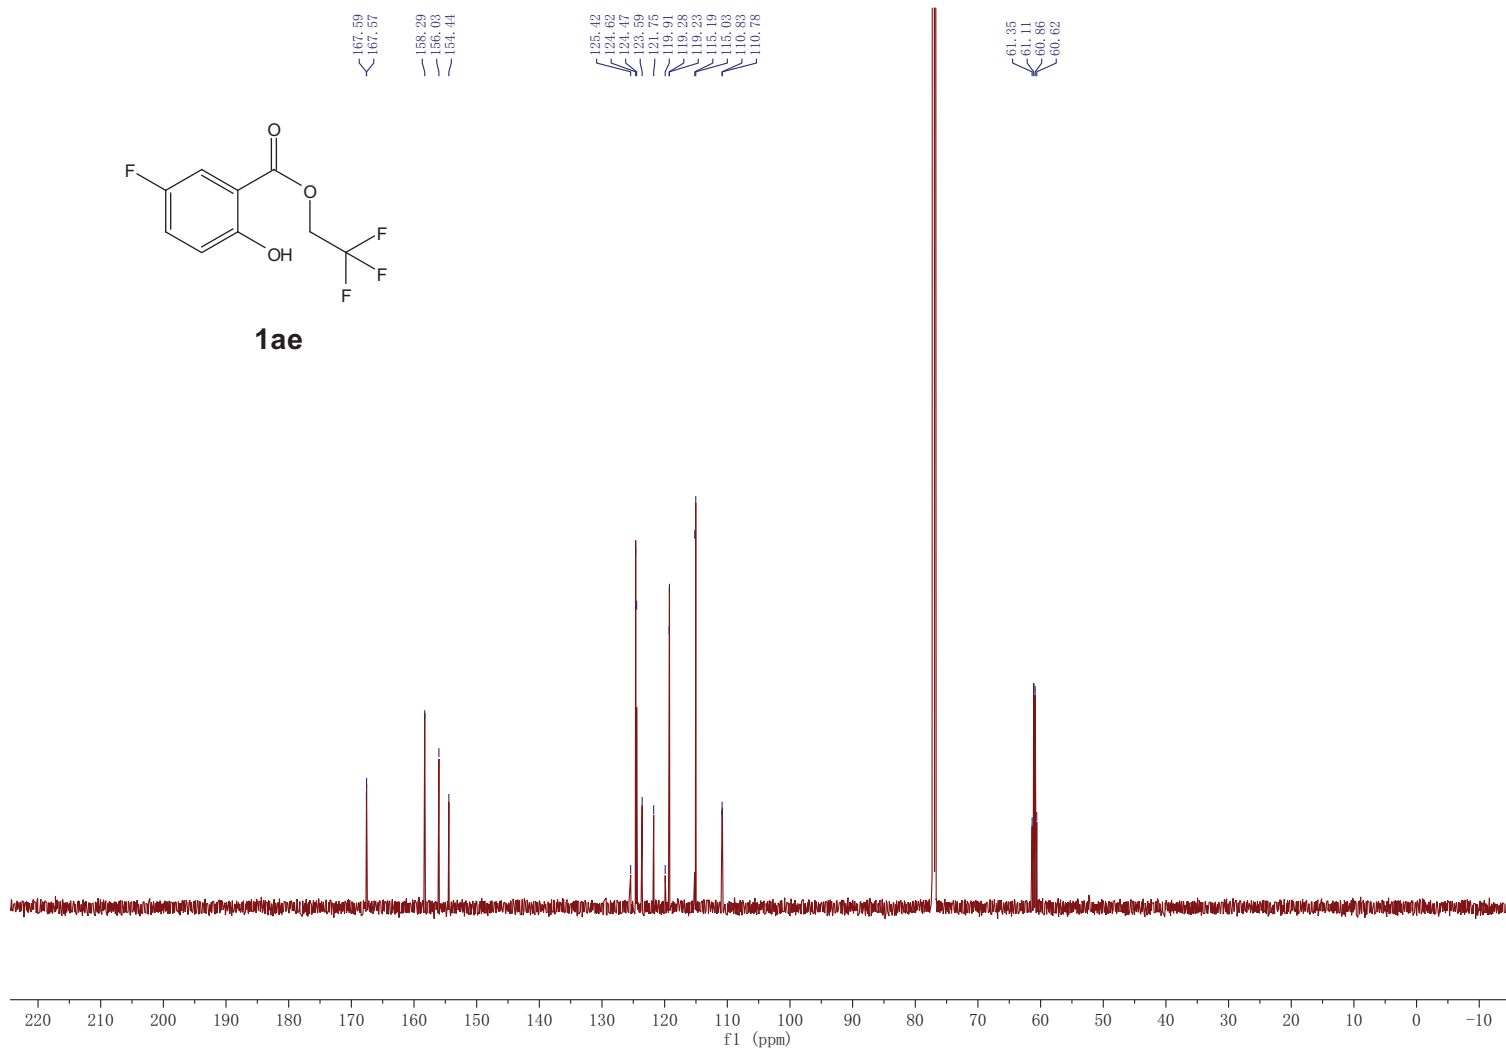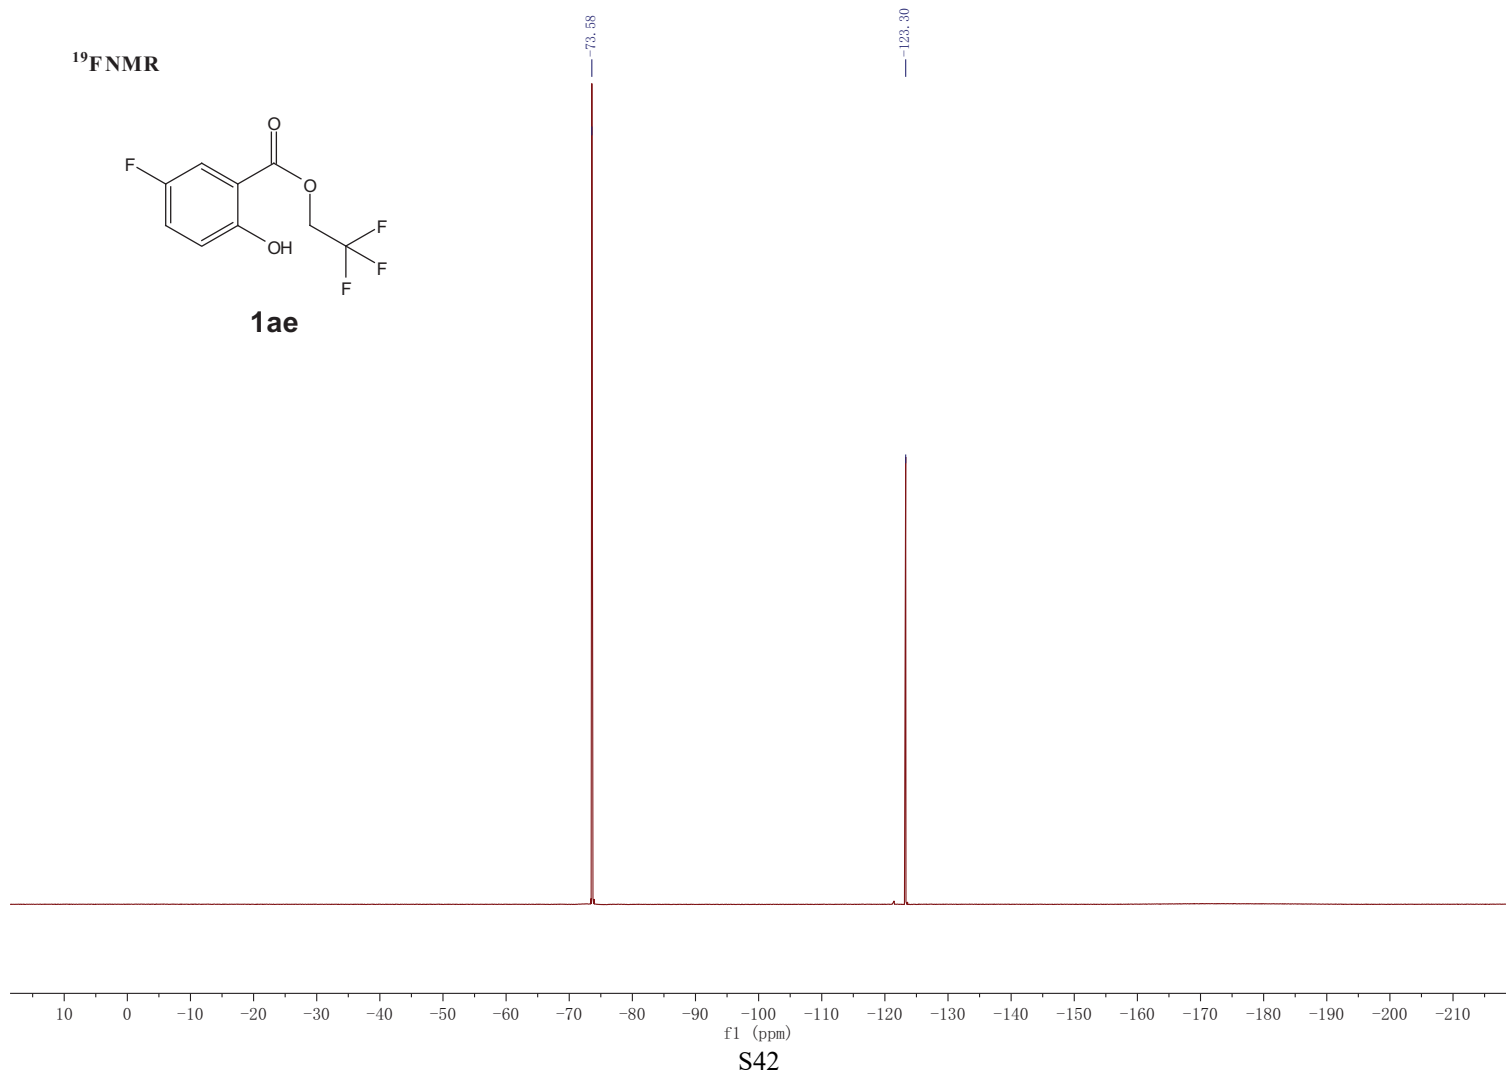

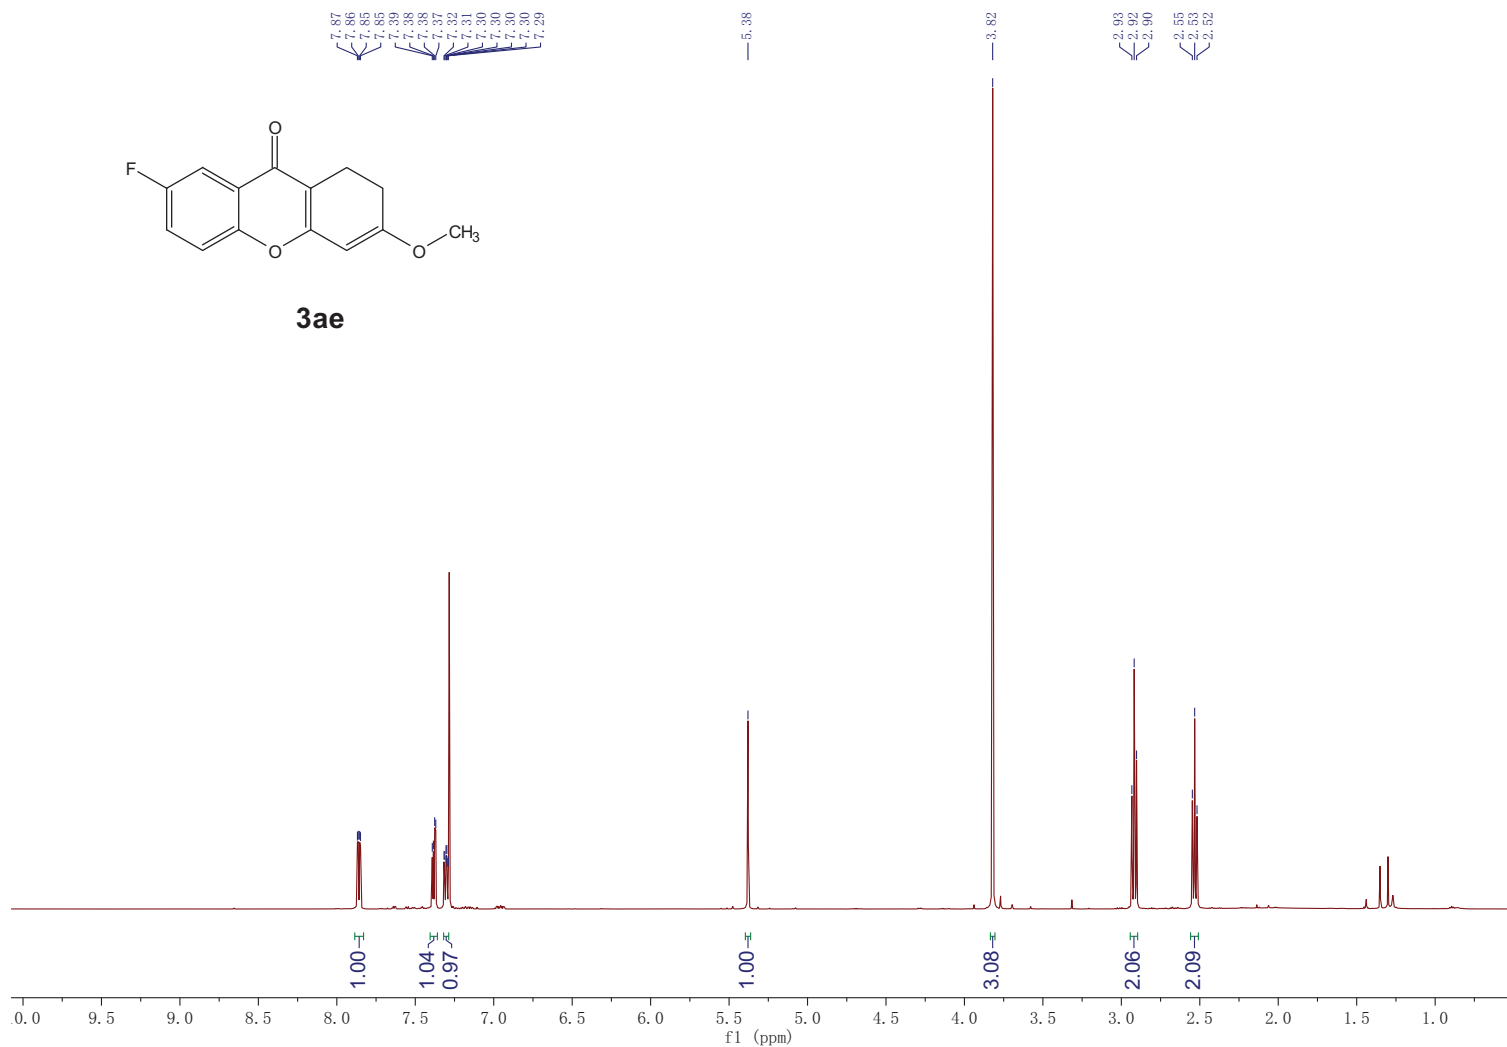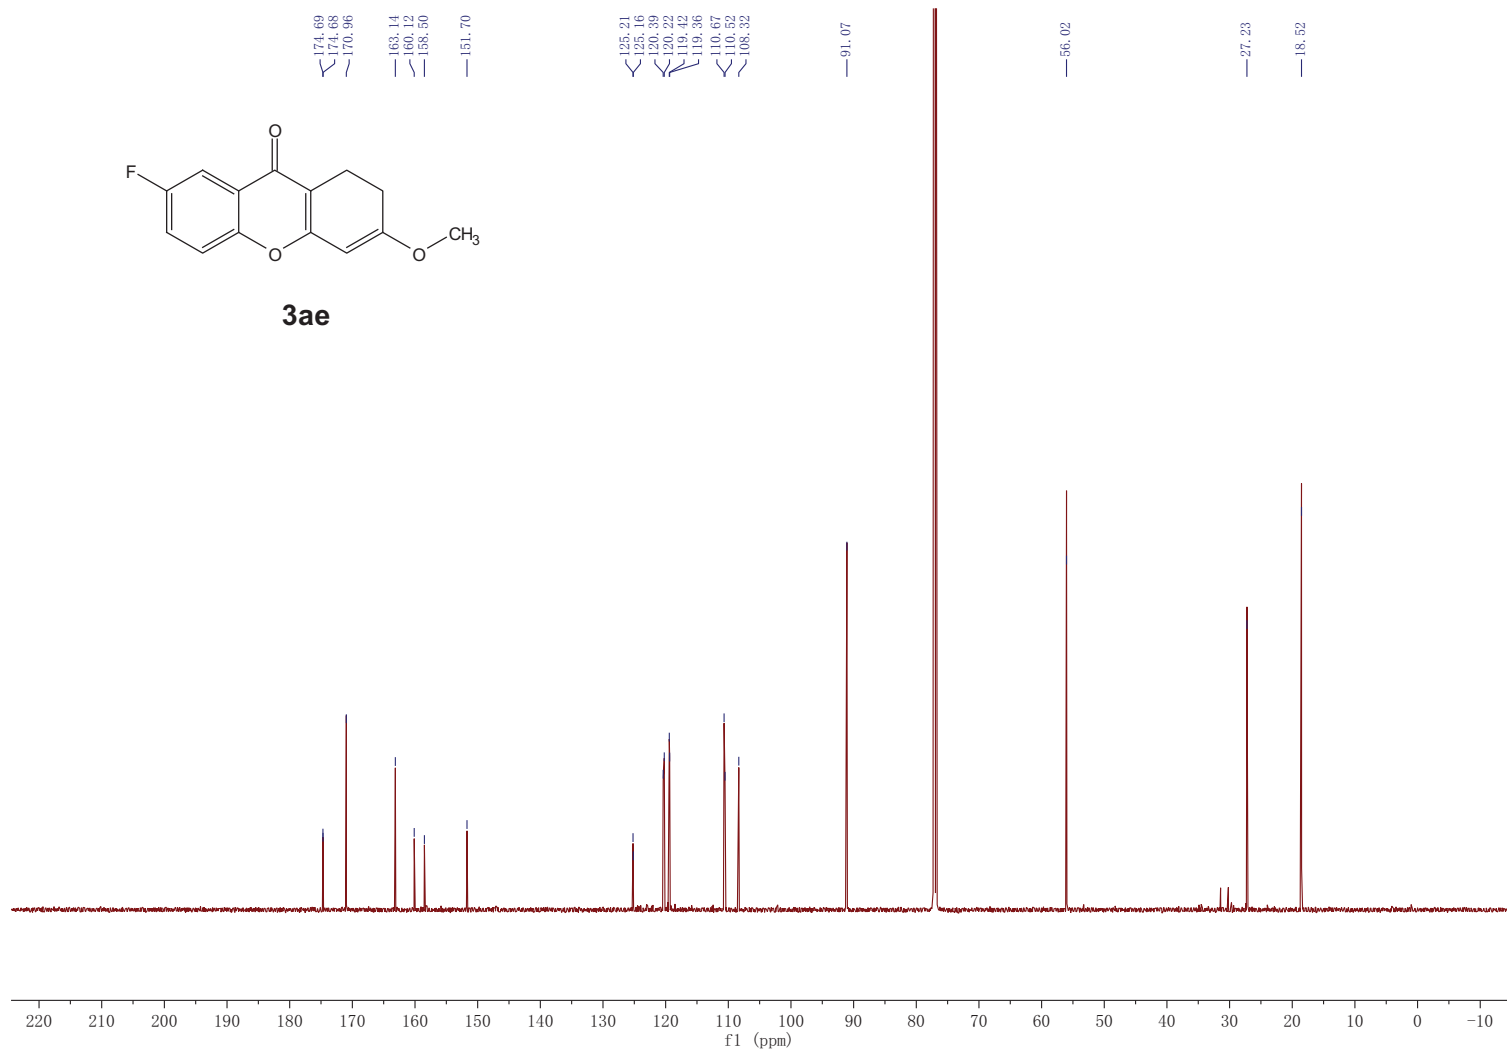

<sup>19</sup>F NMR

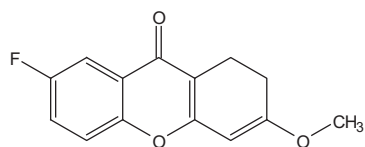

**3ae**

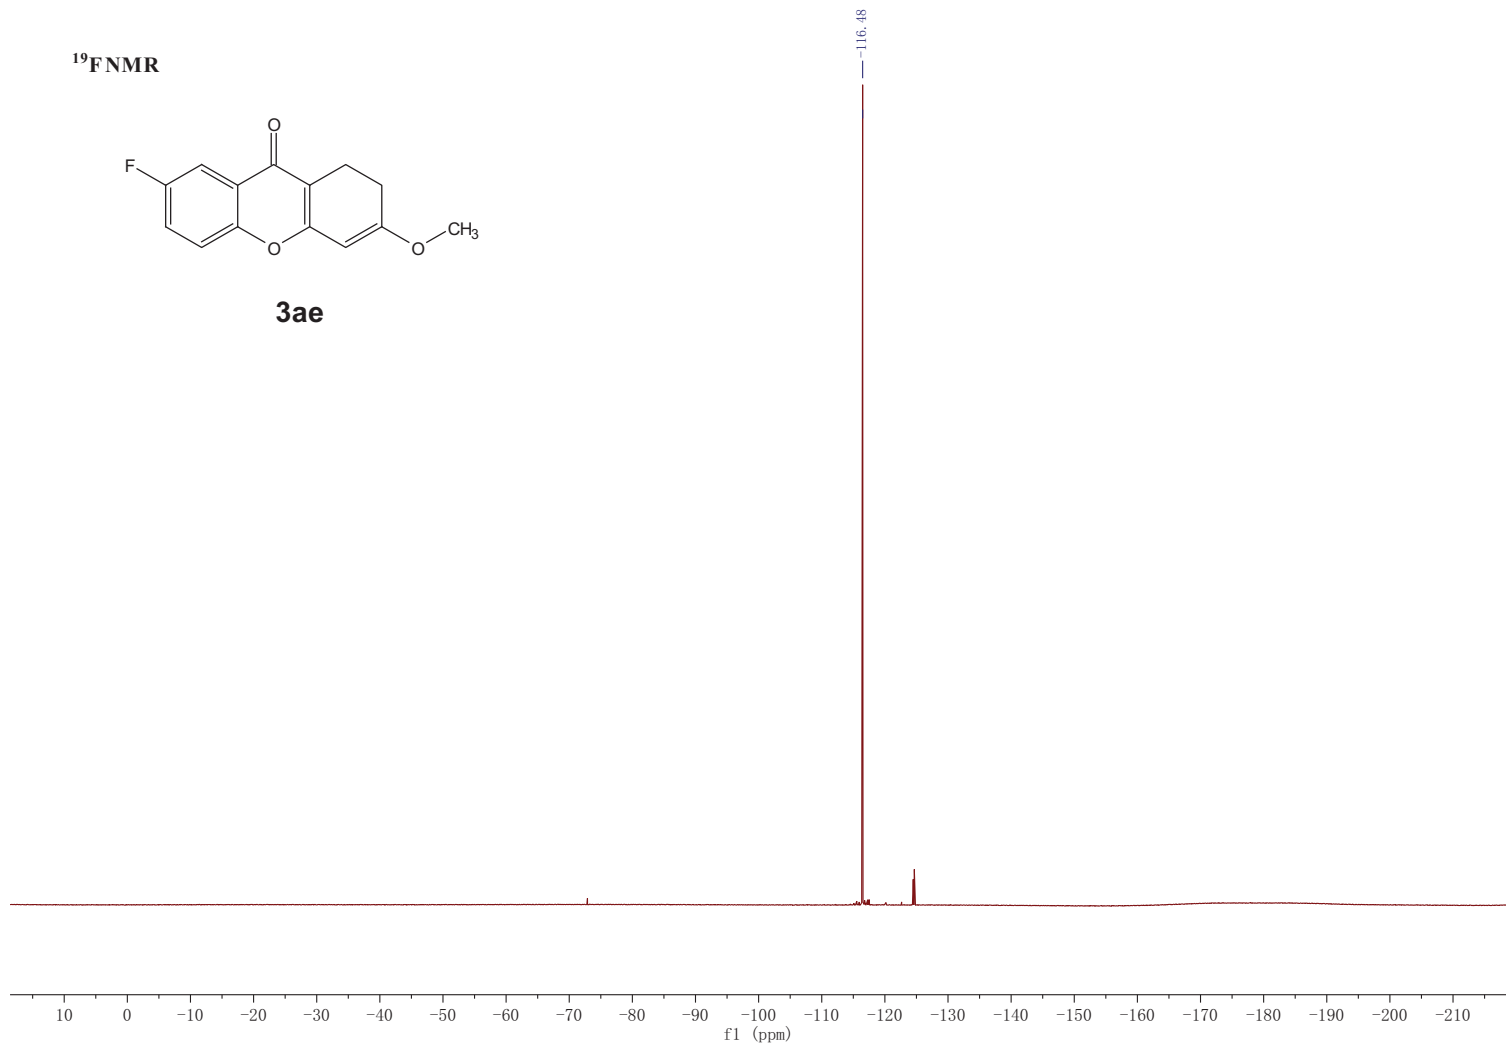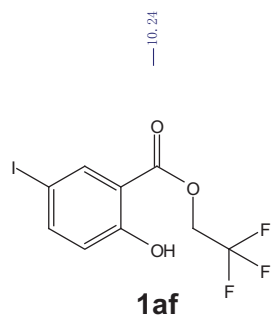

**1af**

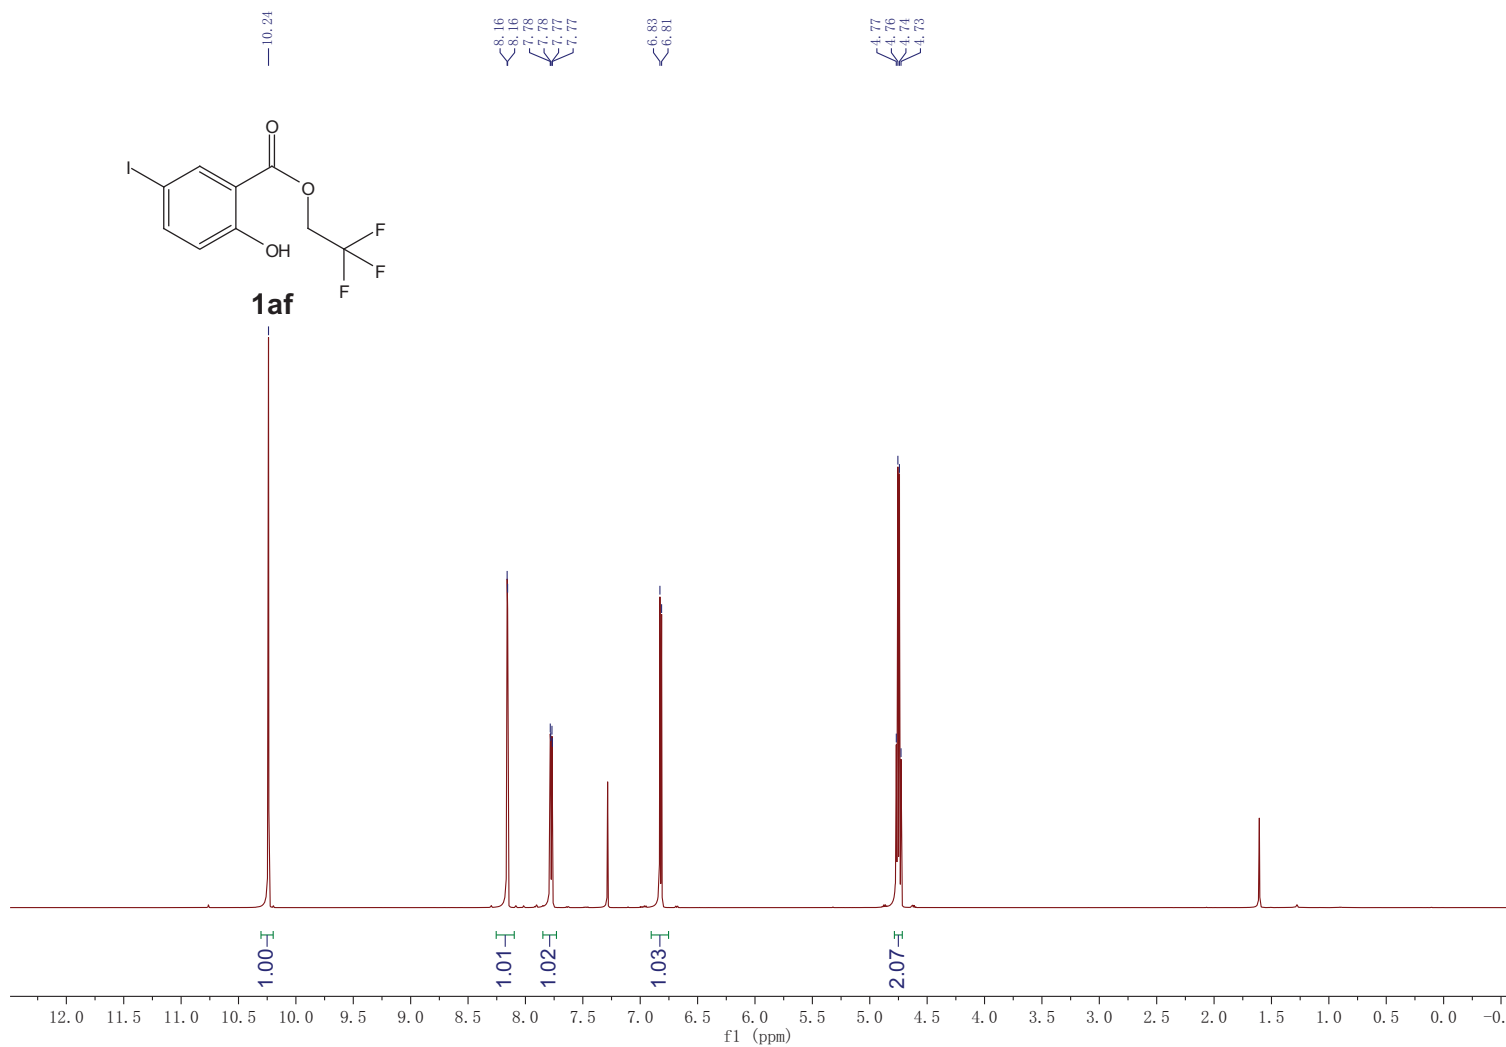

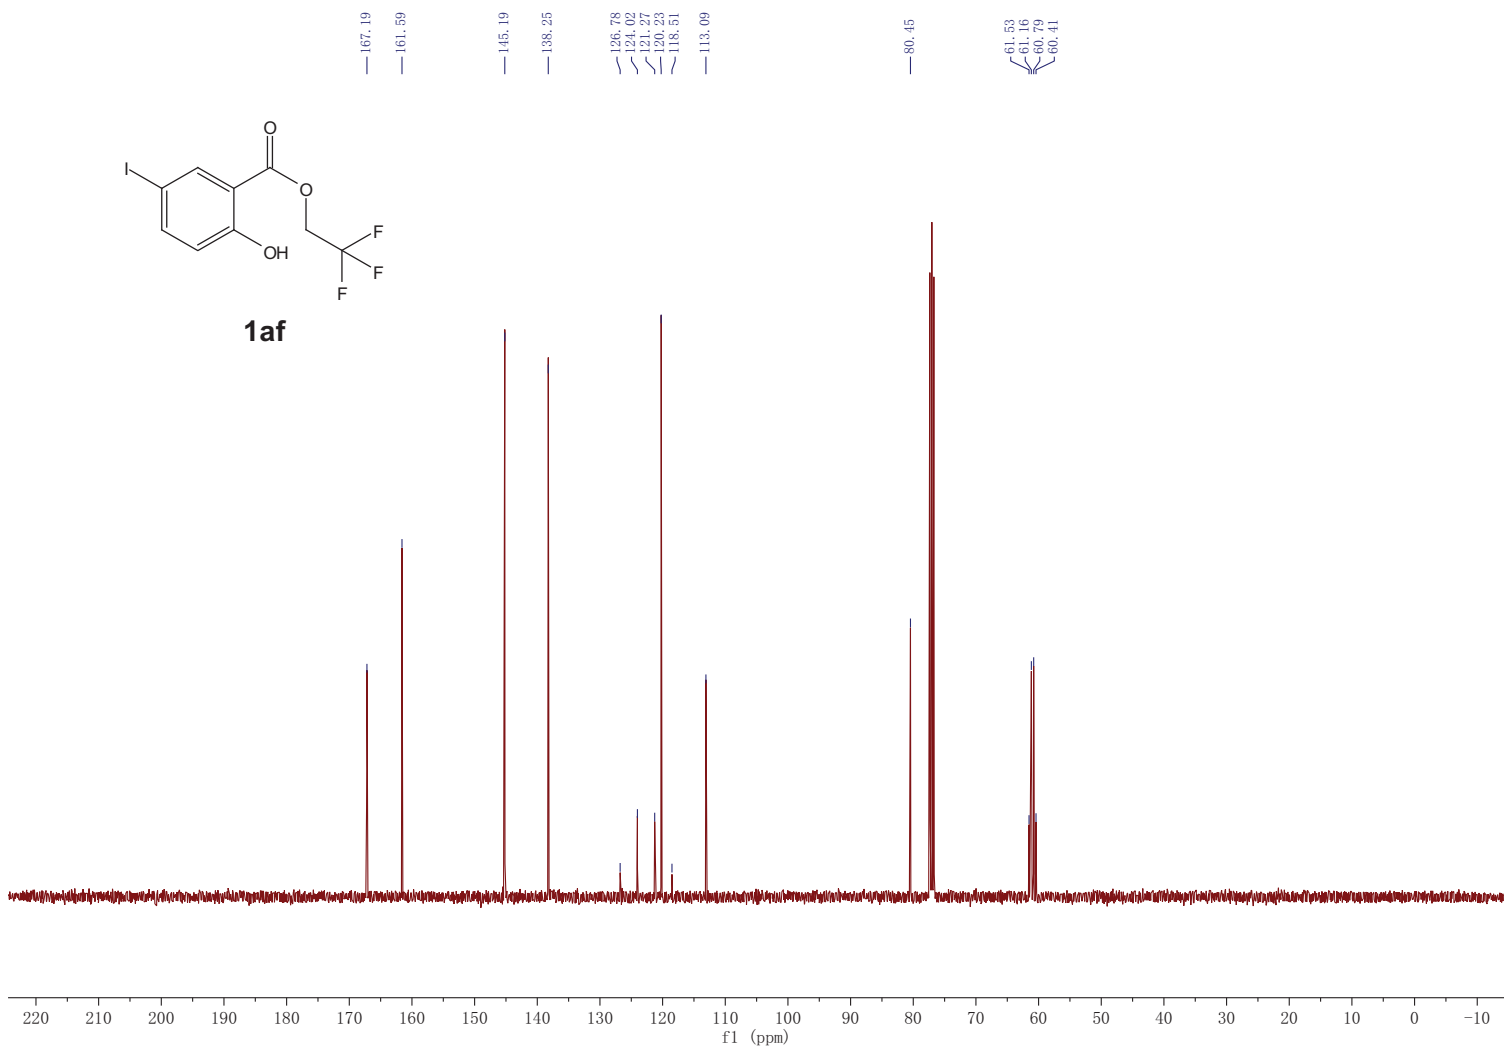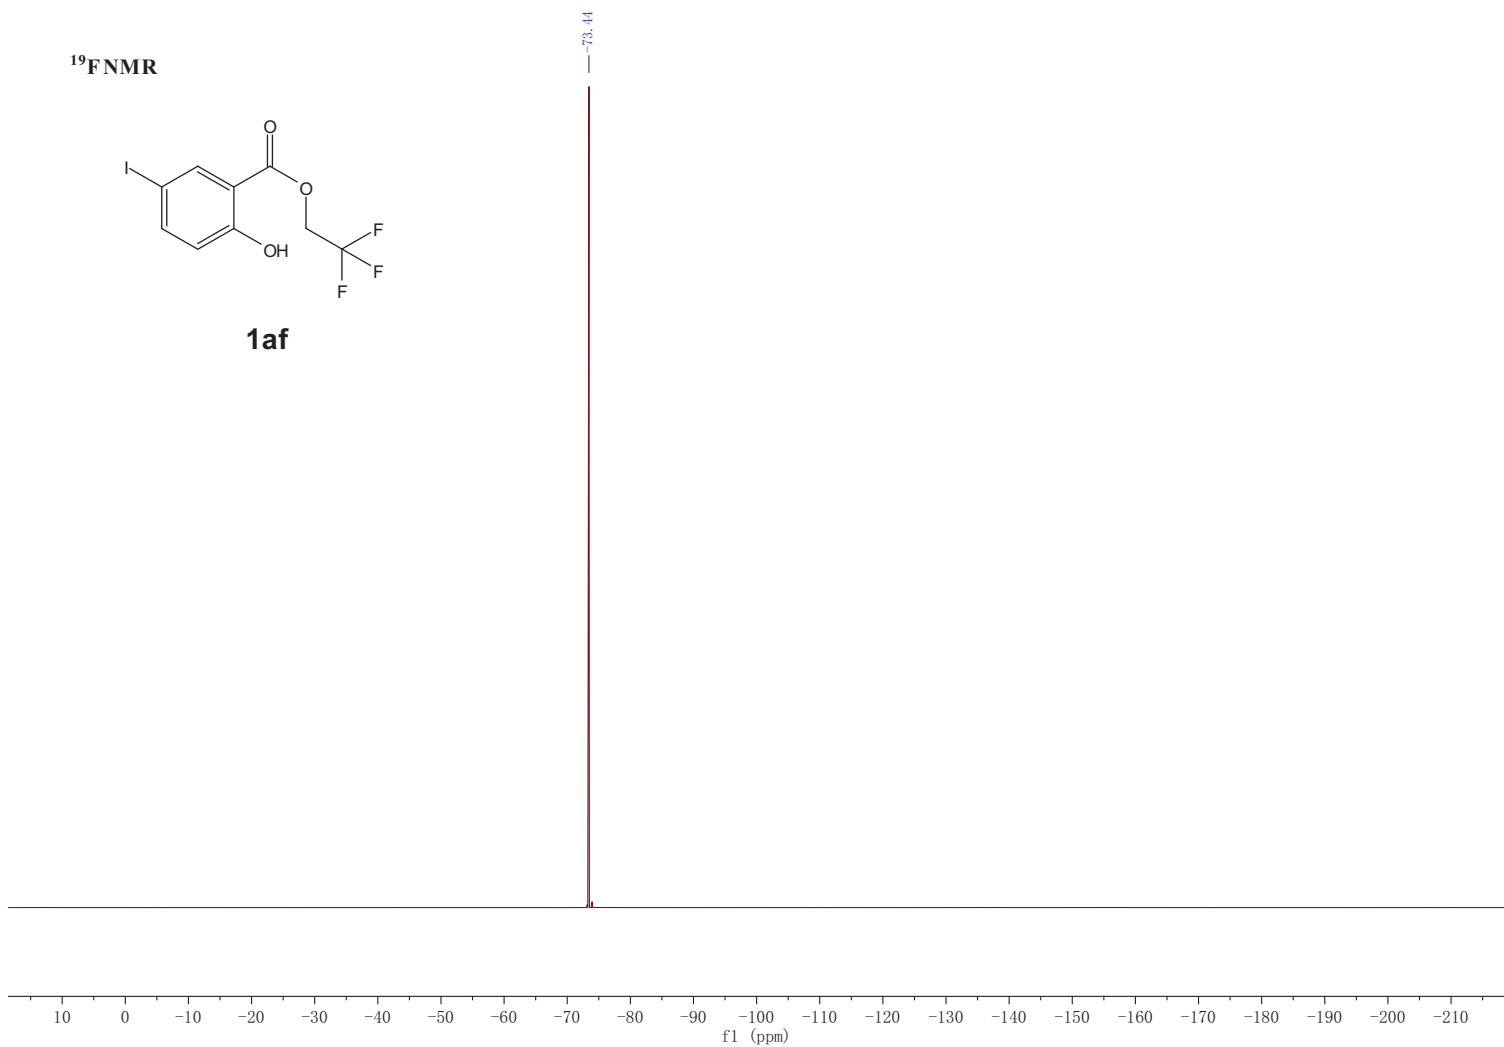

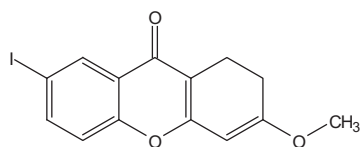

**3af**

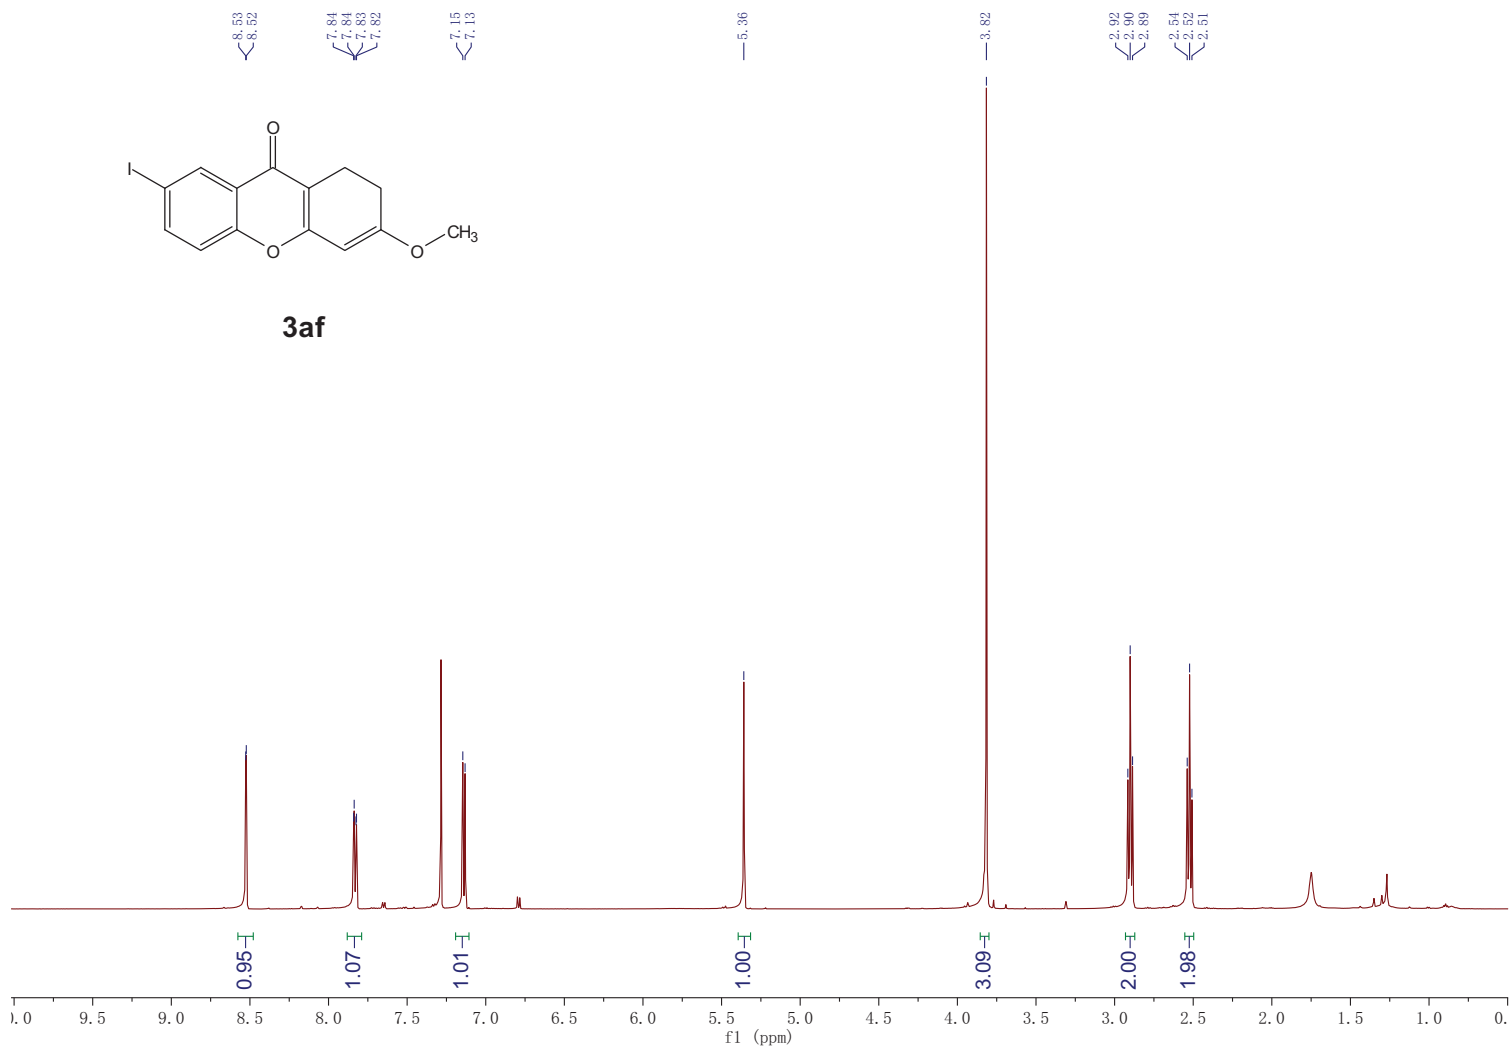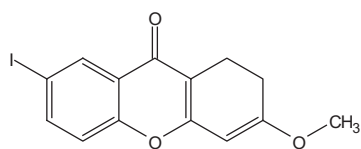

**3af**

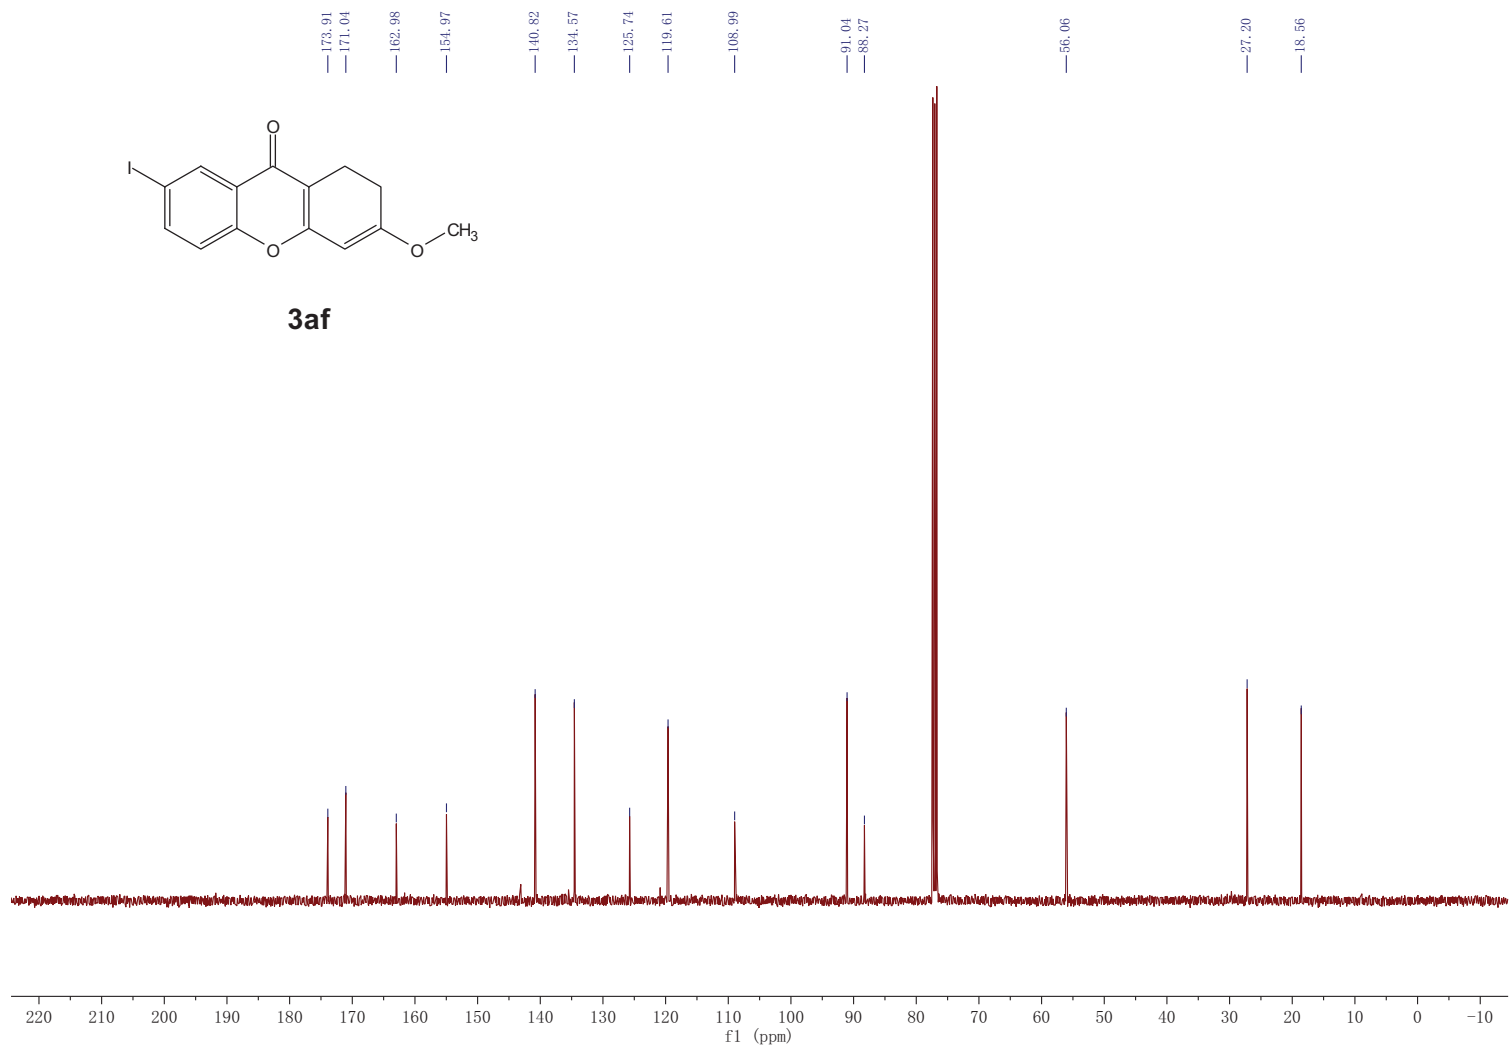

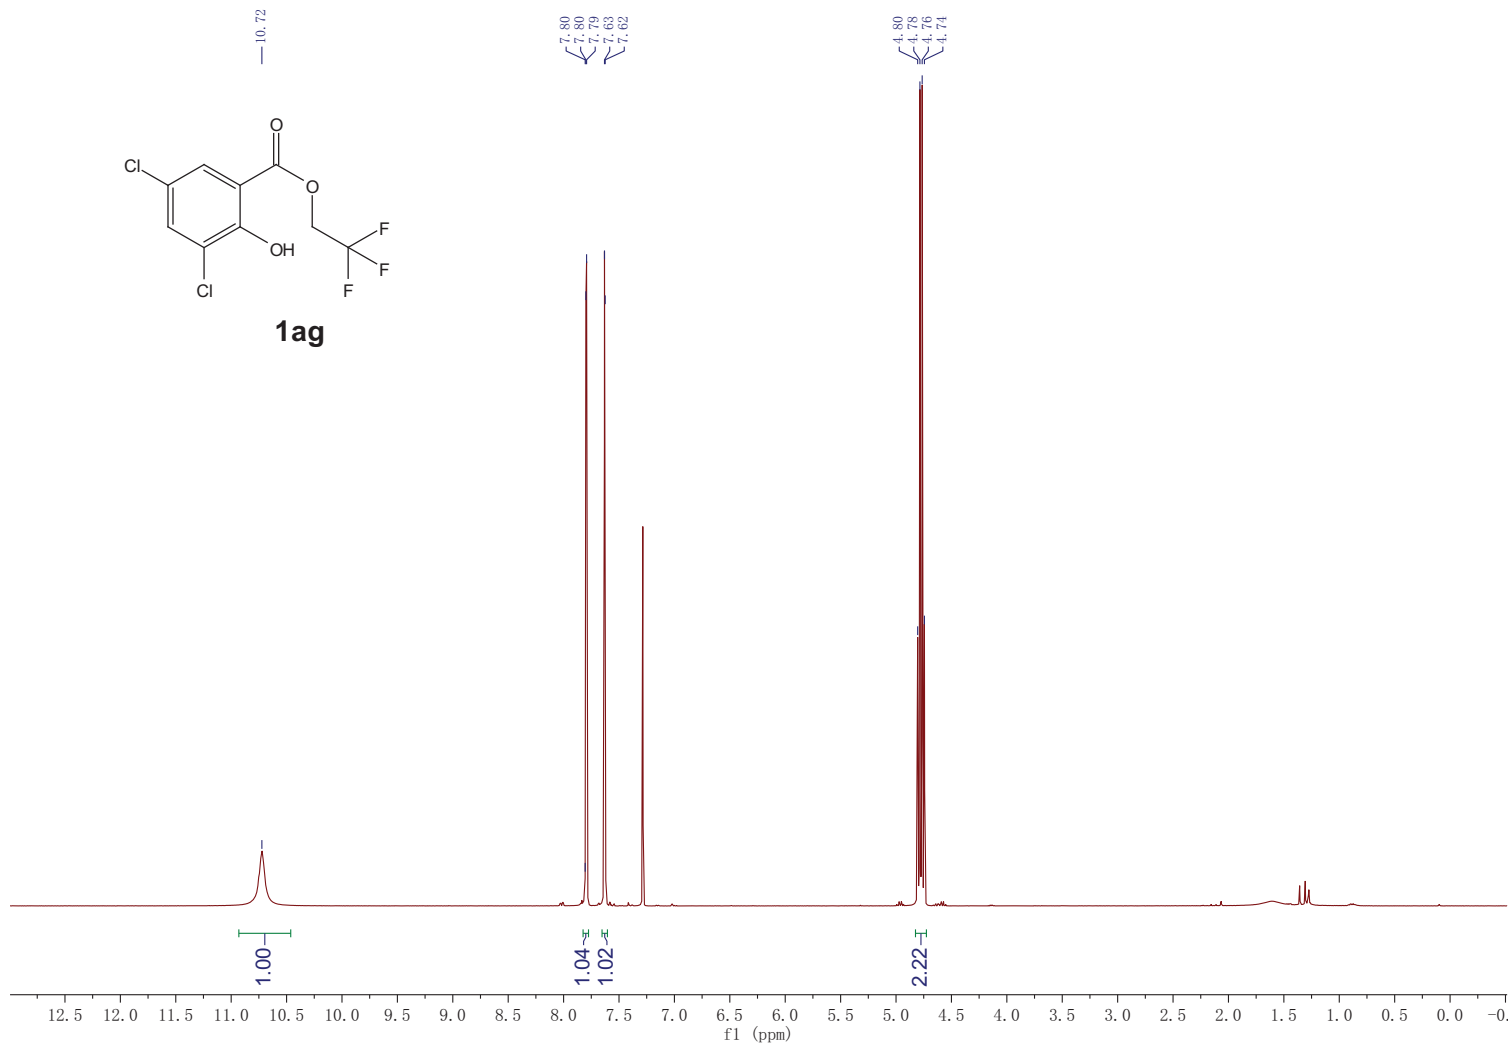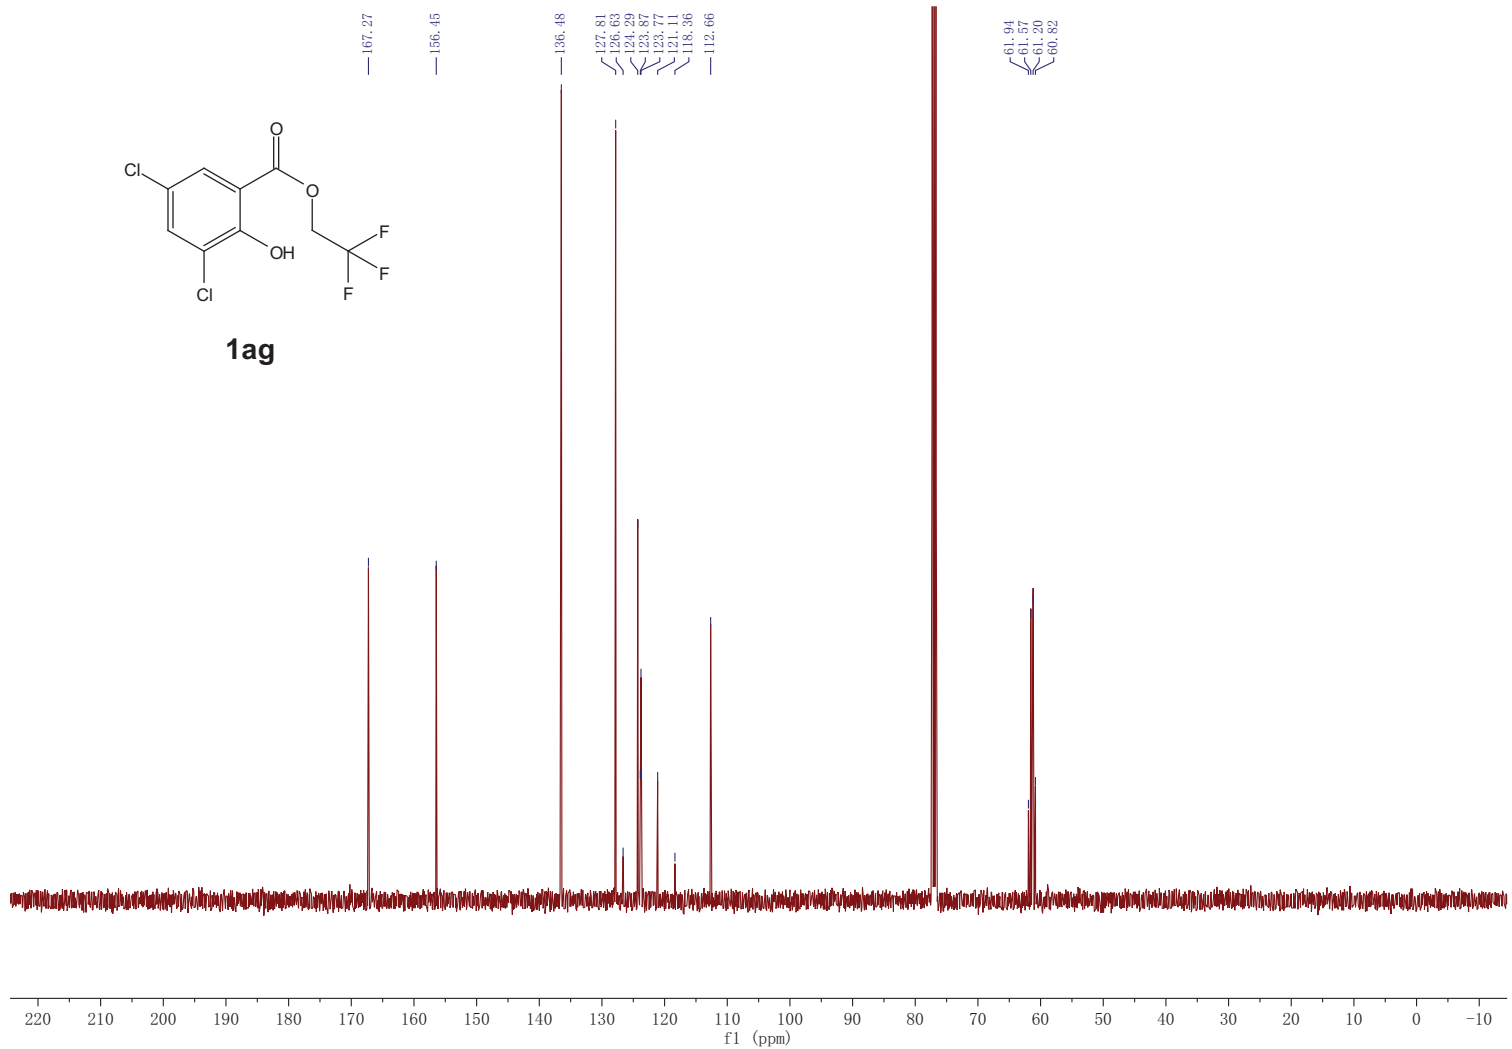

<sup>19</sup>F NMR

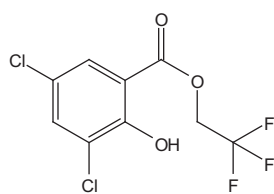

**1ag**

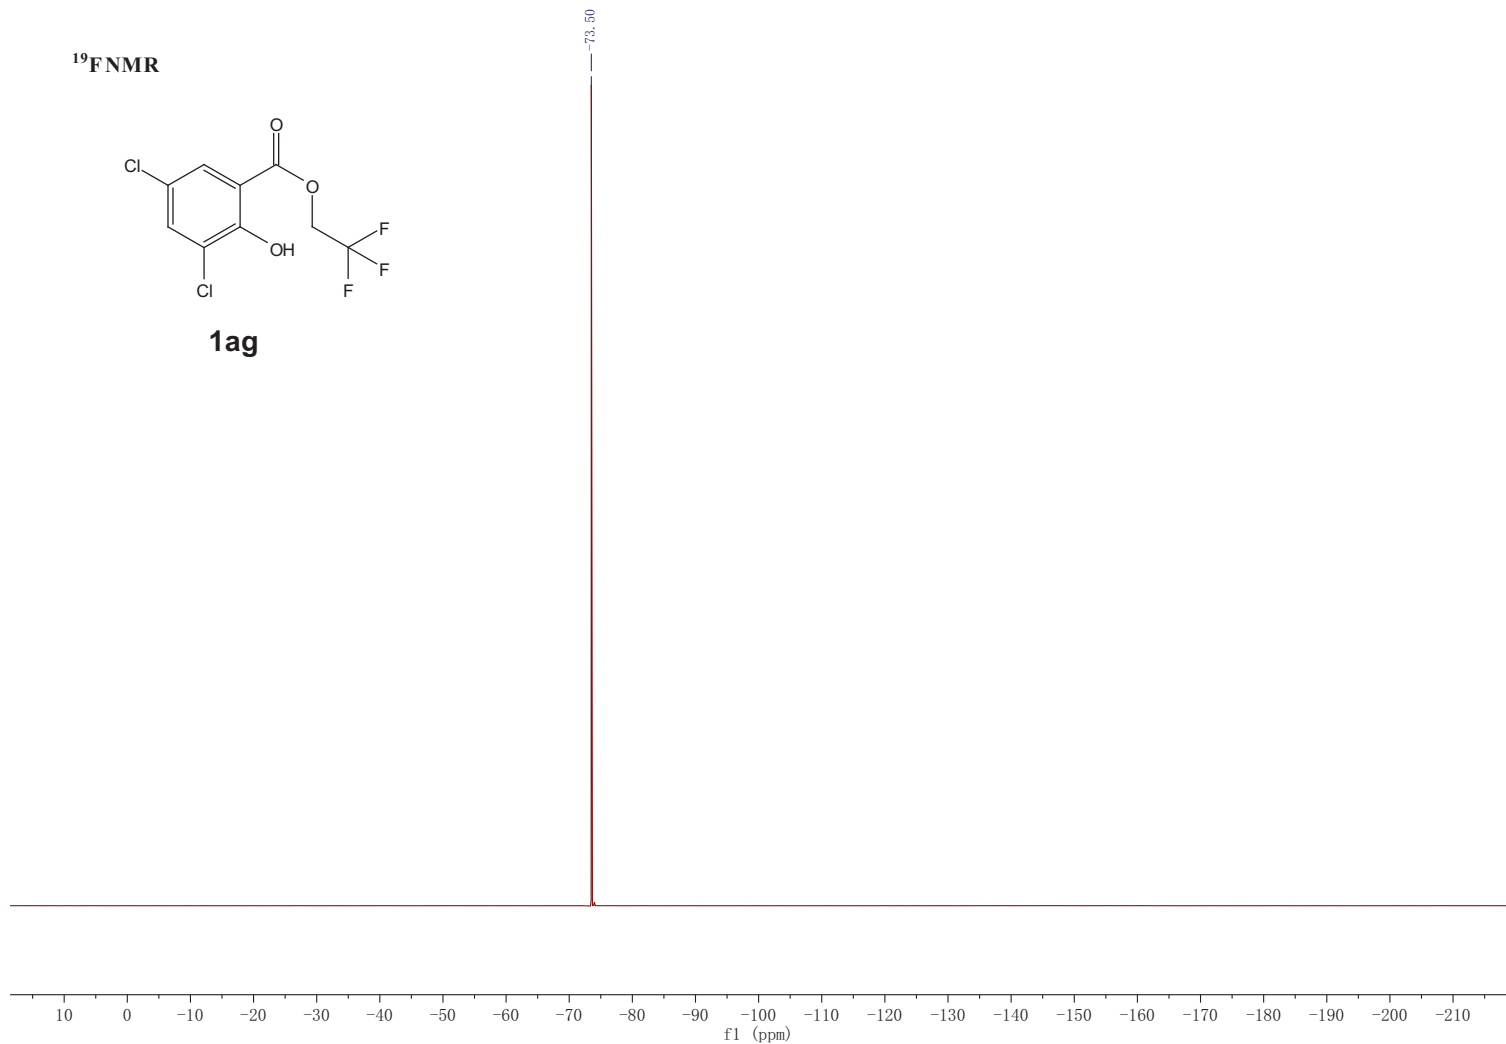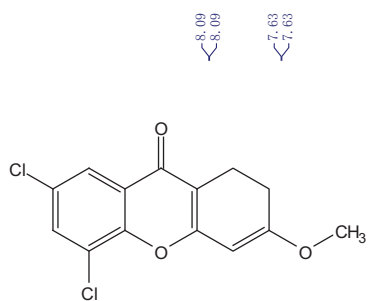

**3ag**

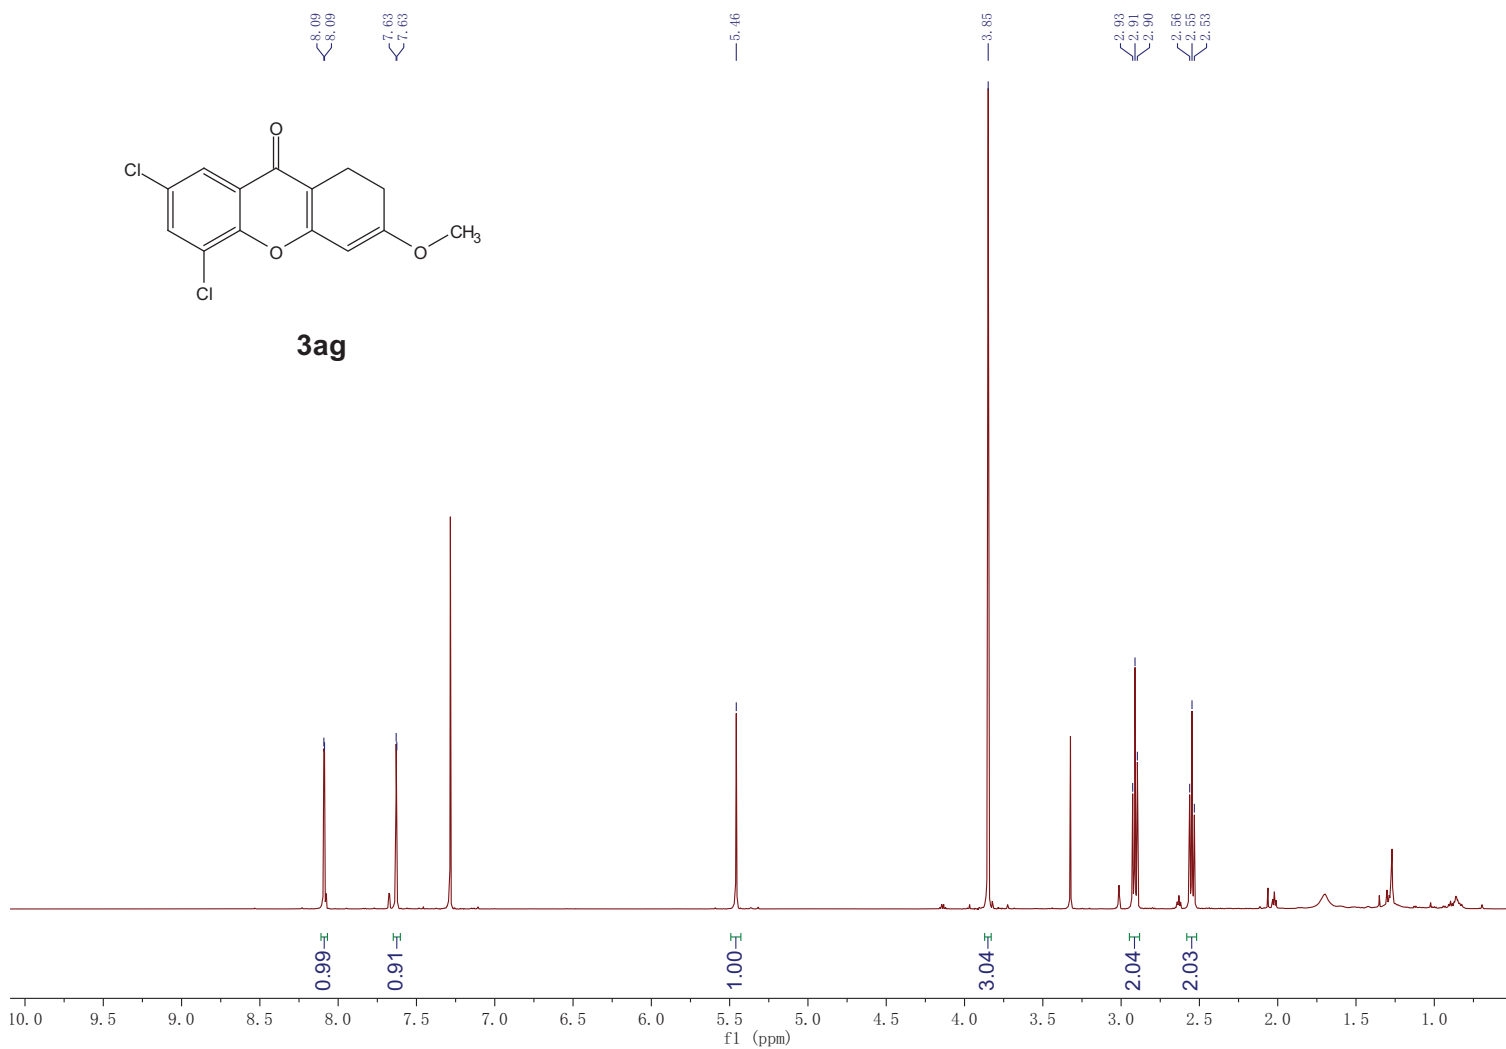



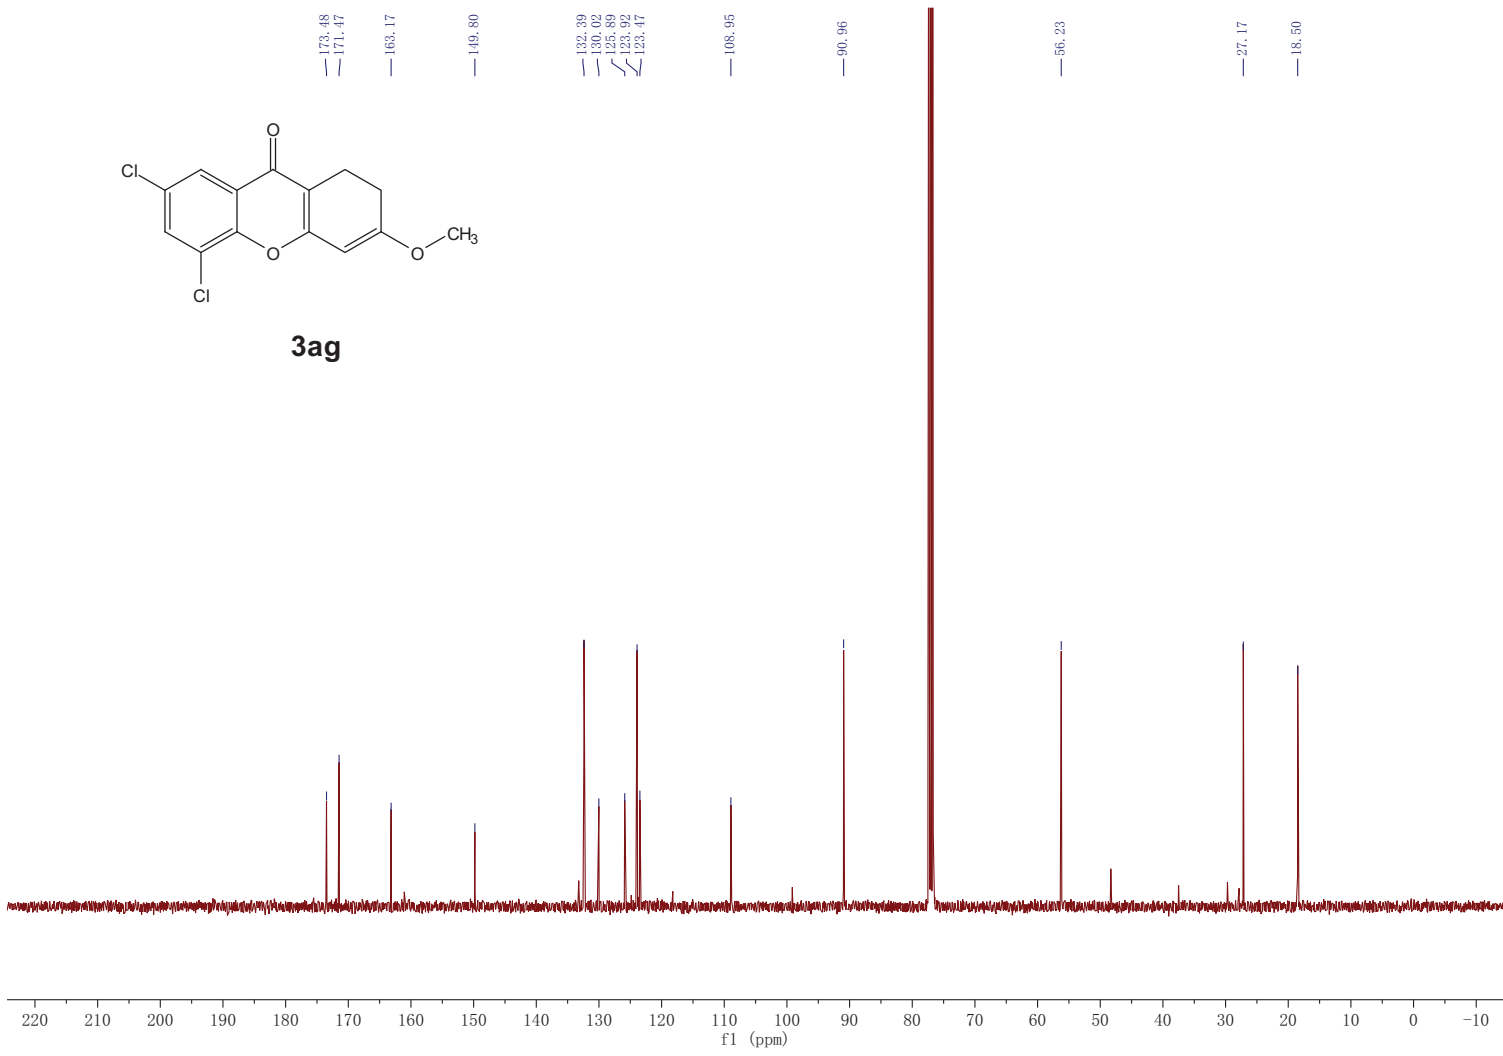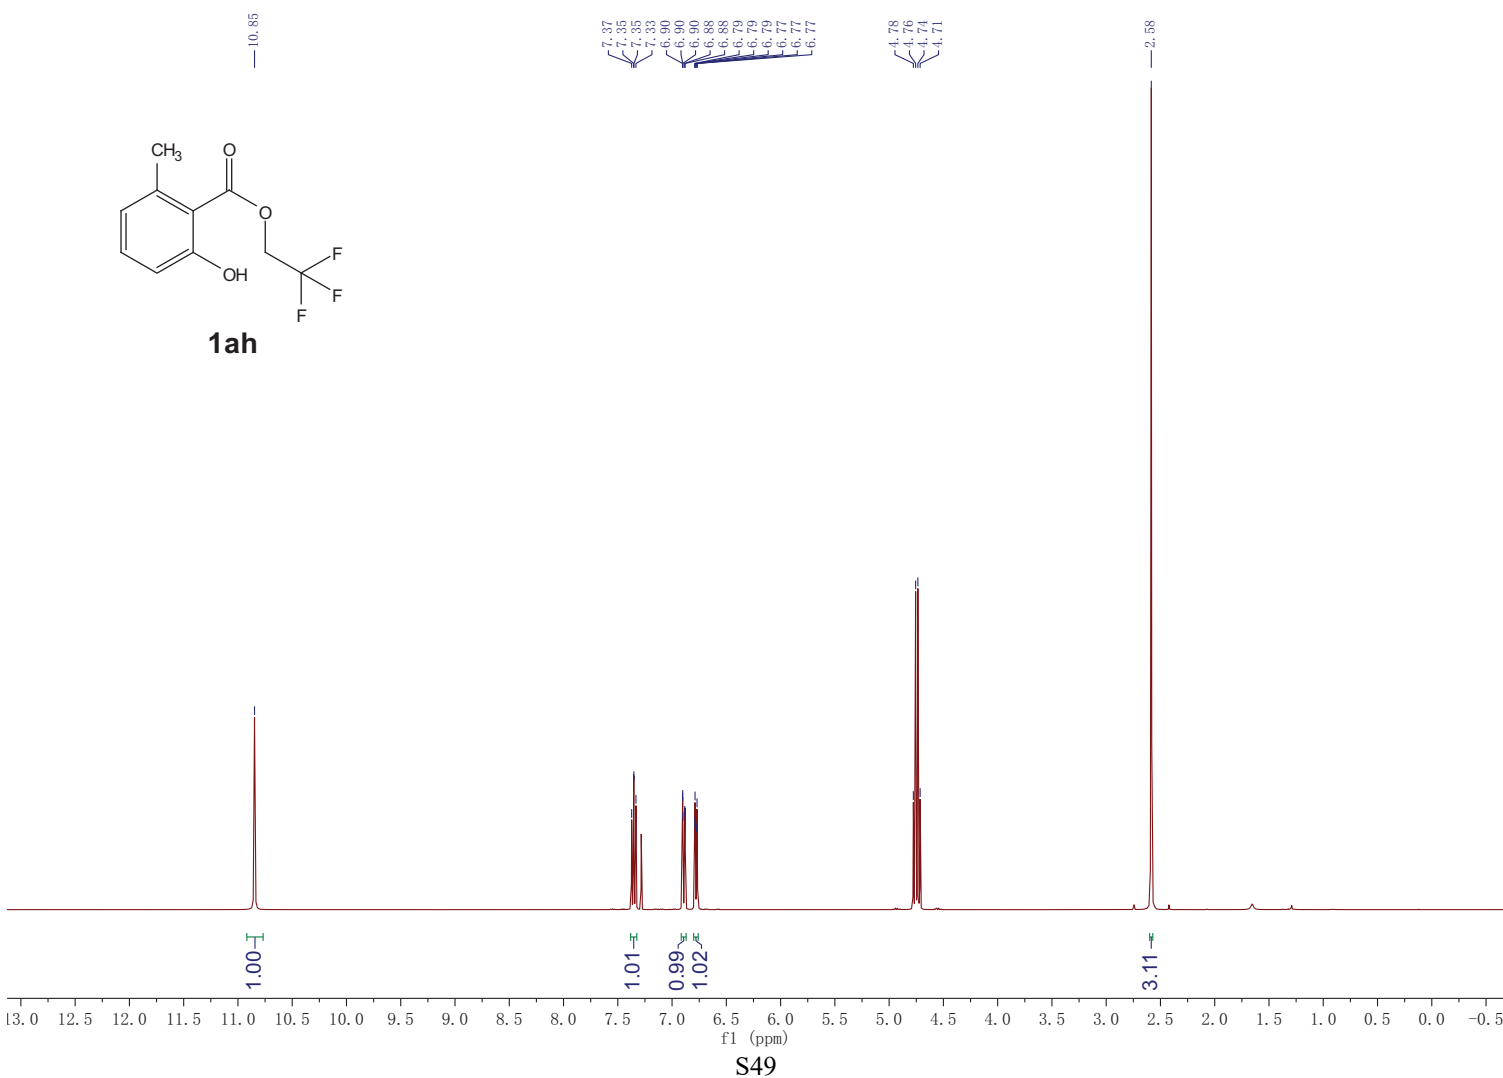

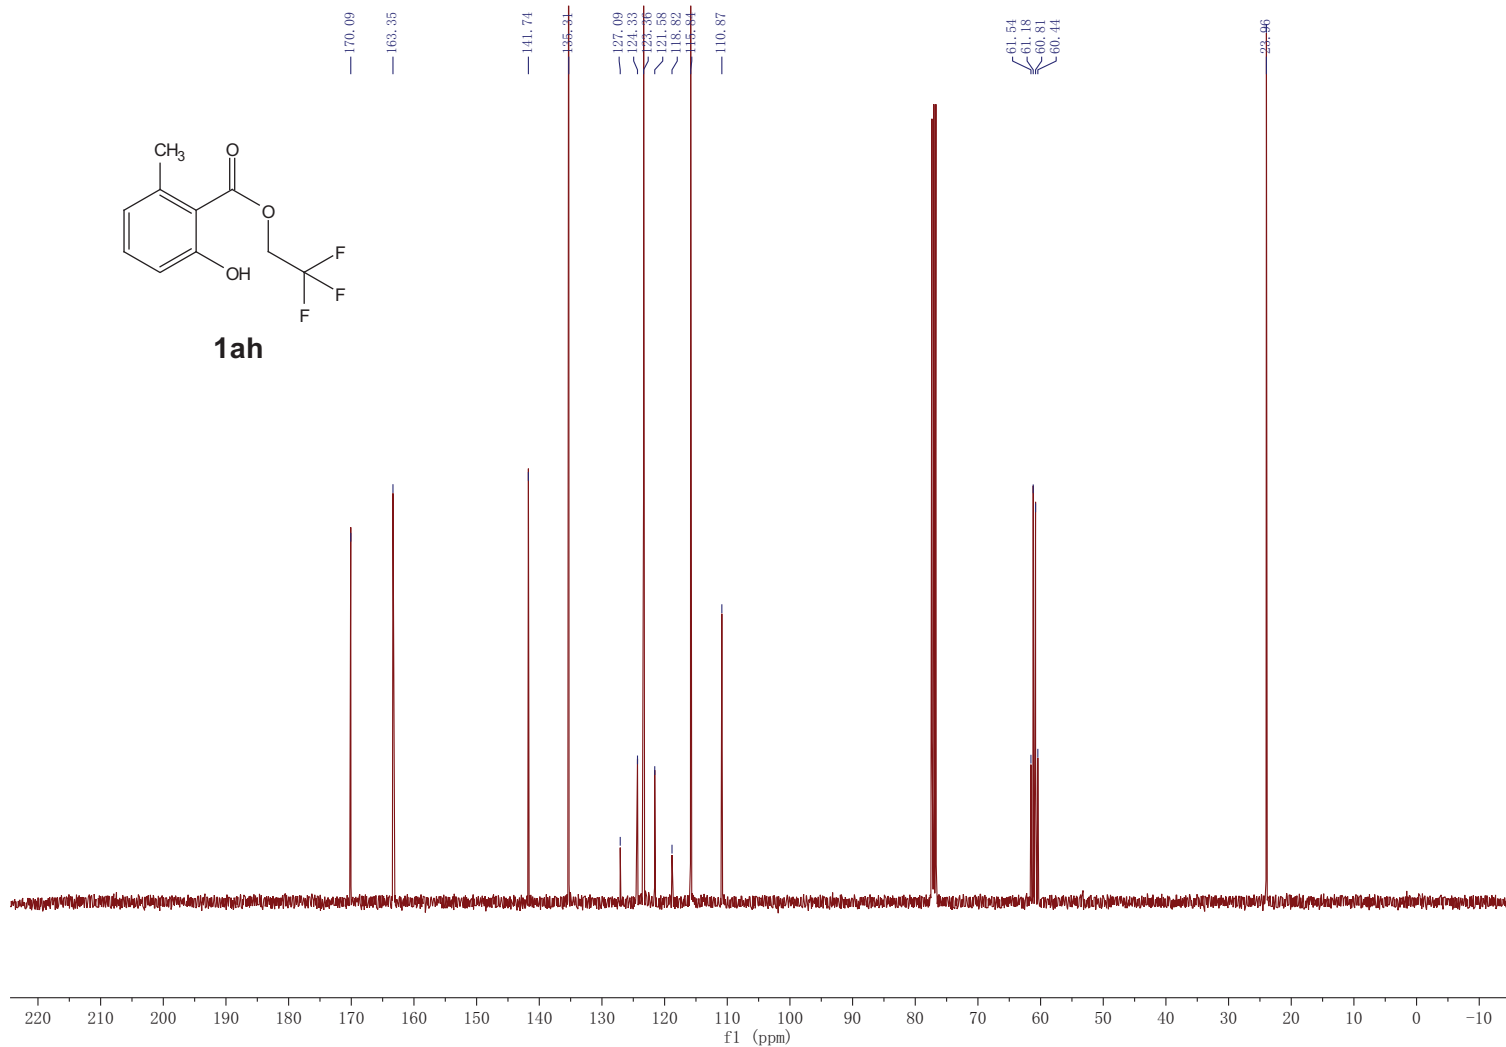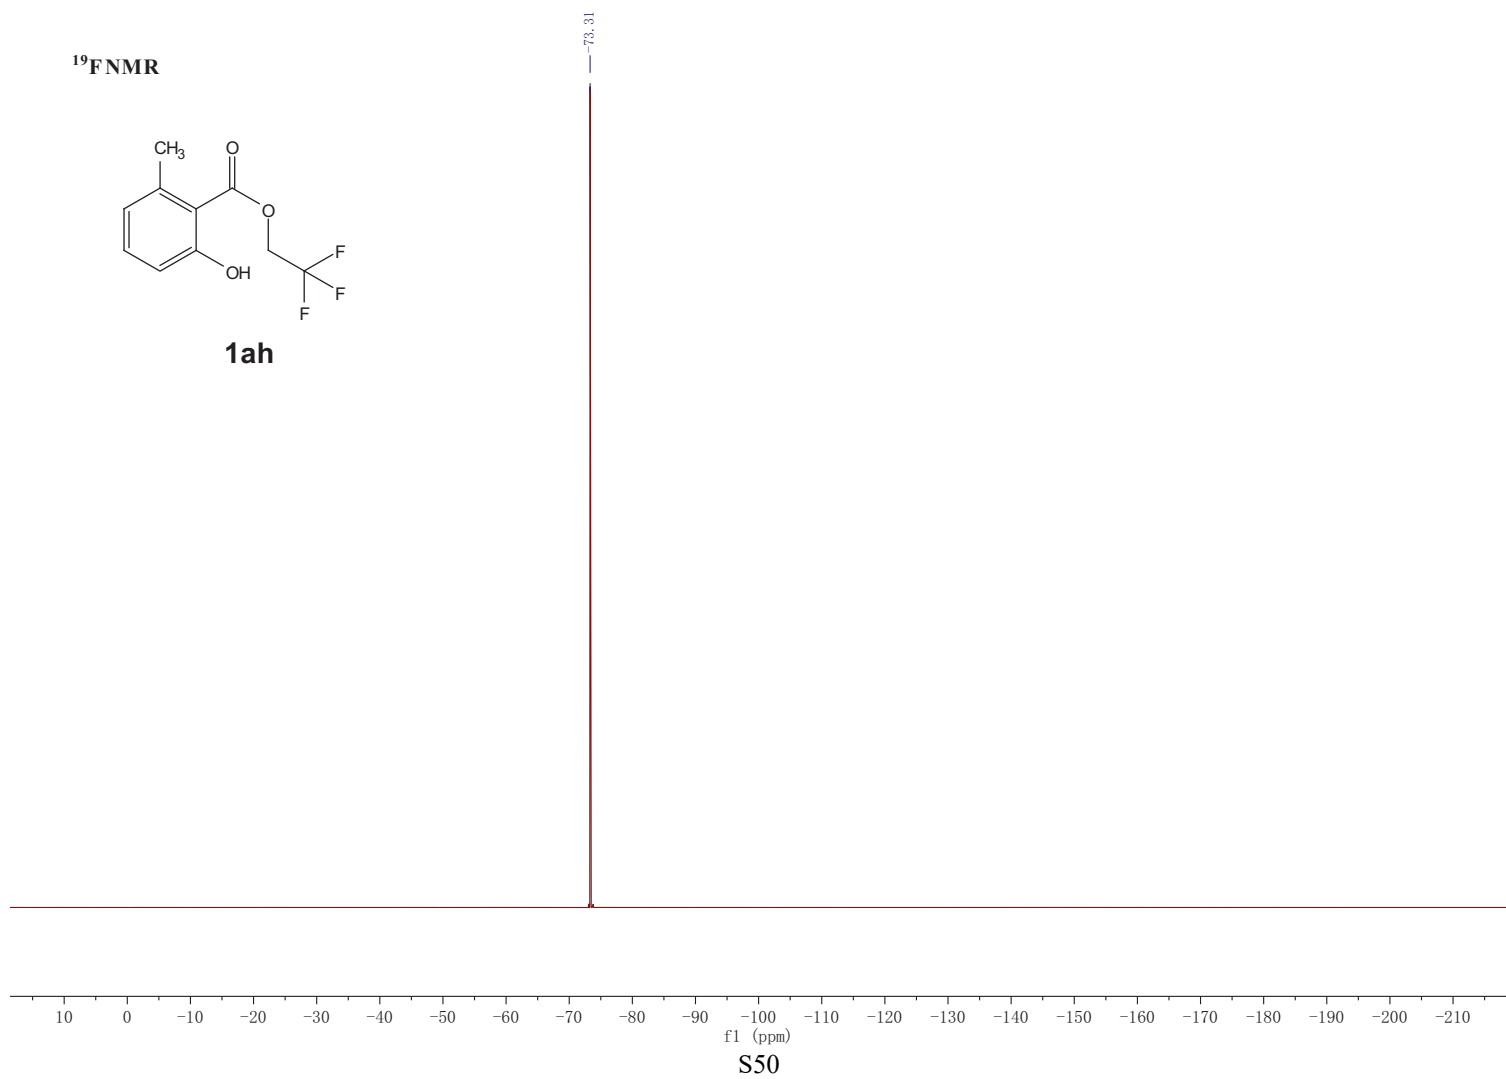

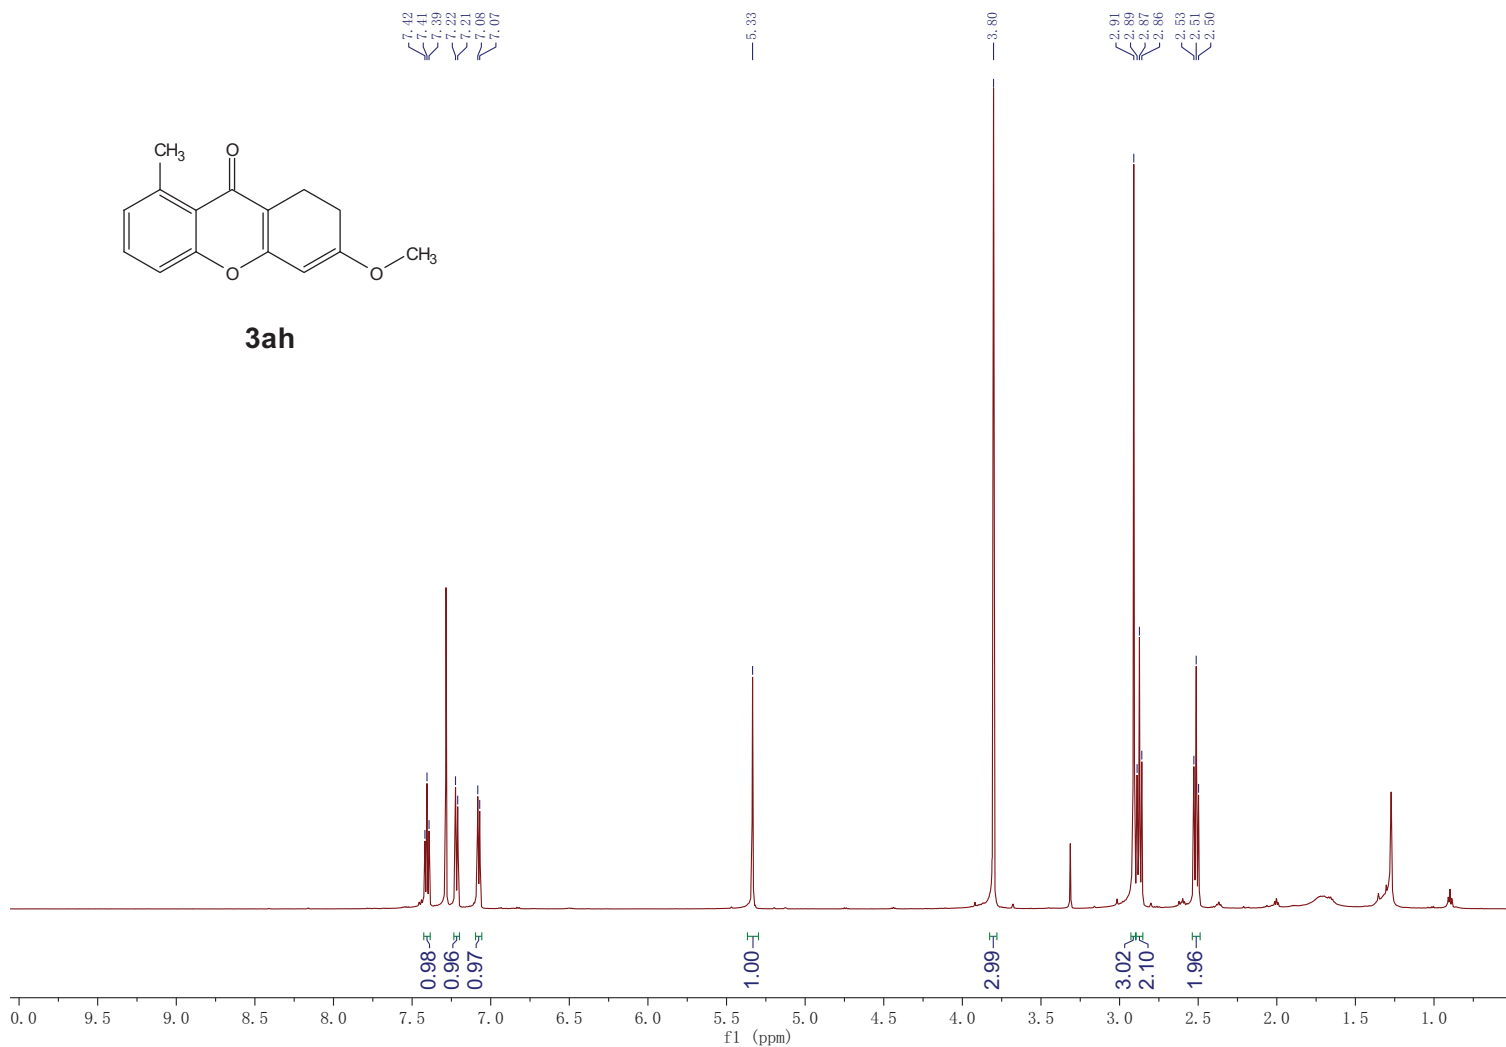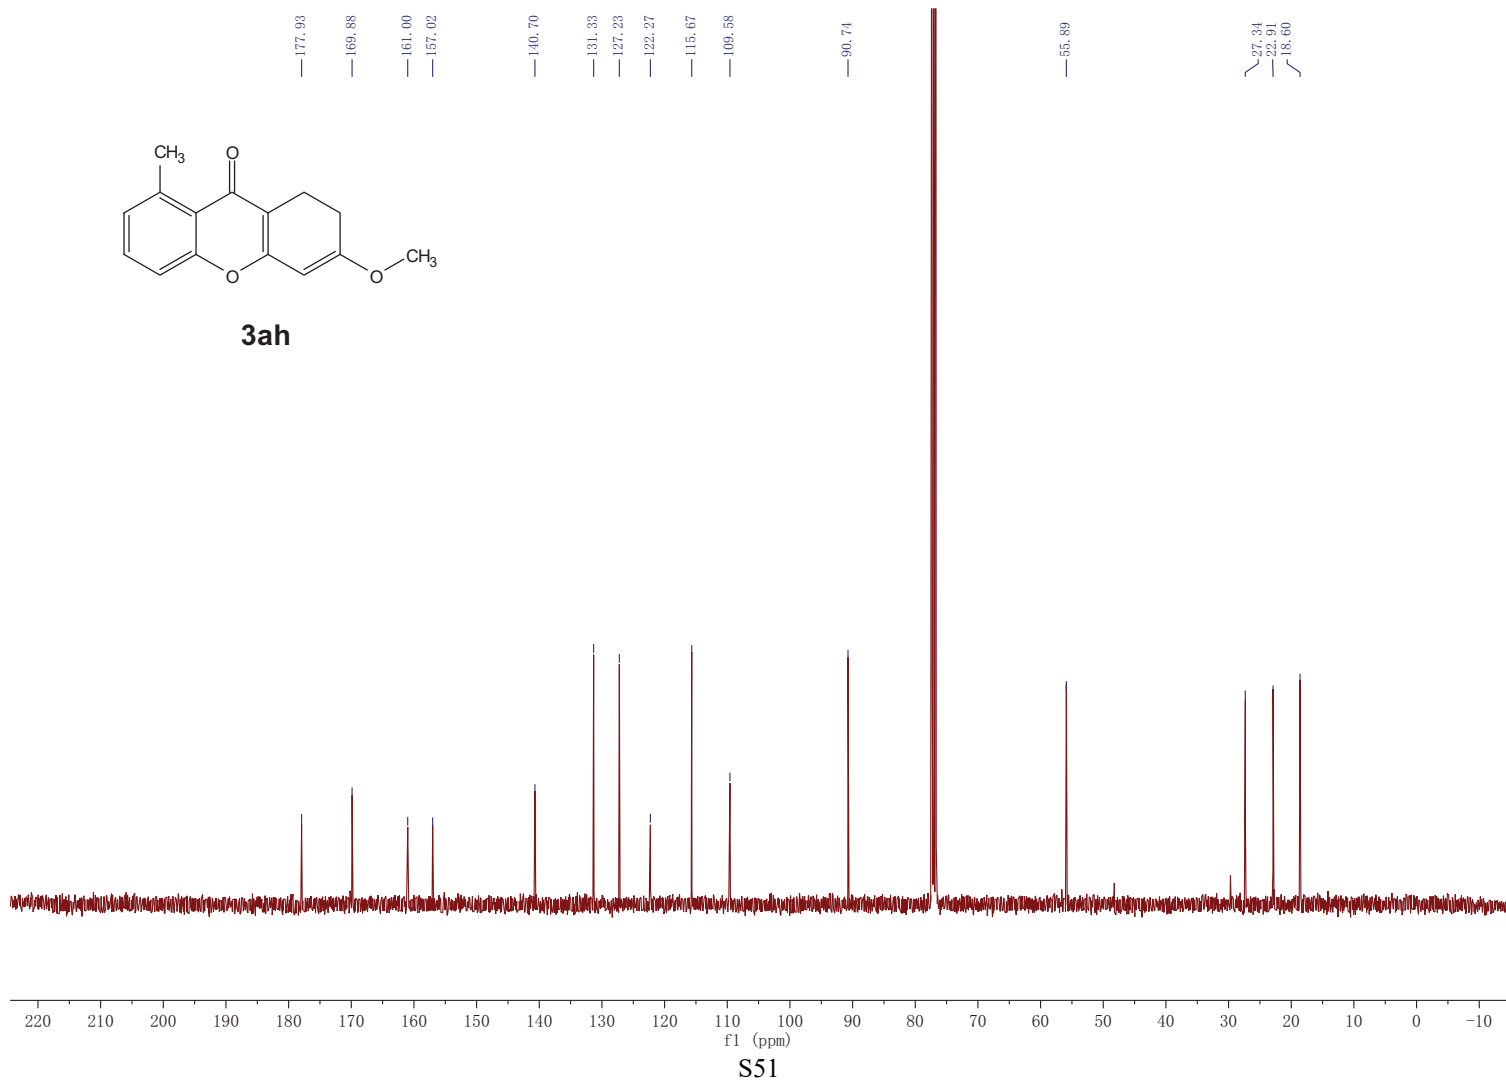

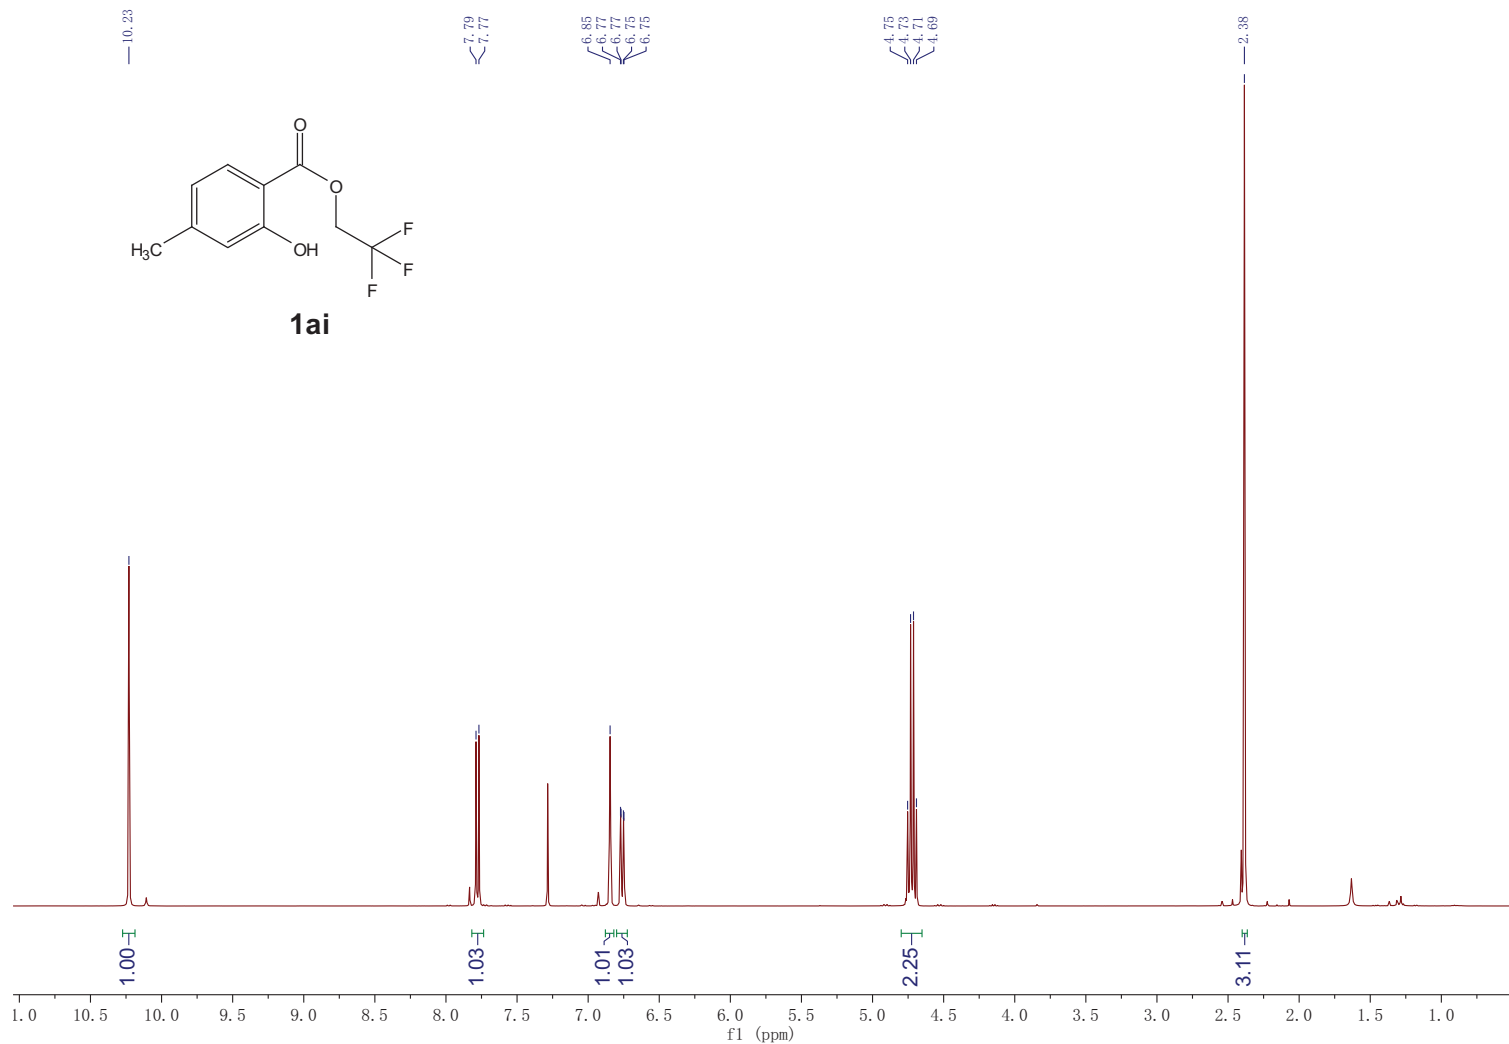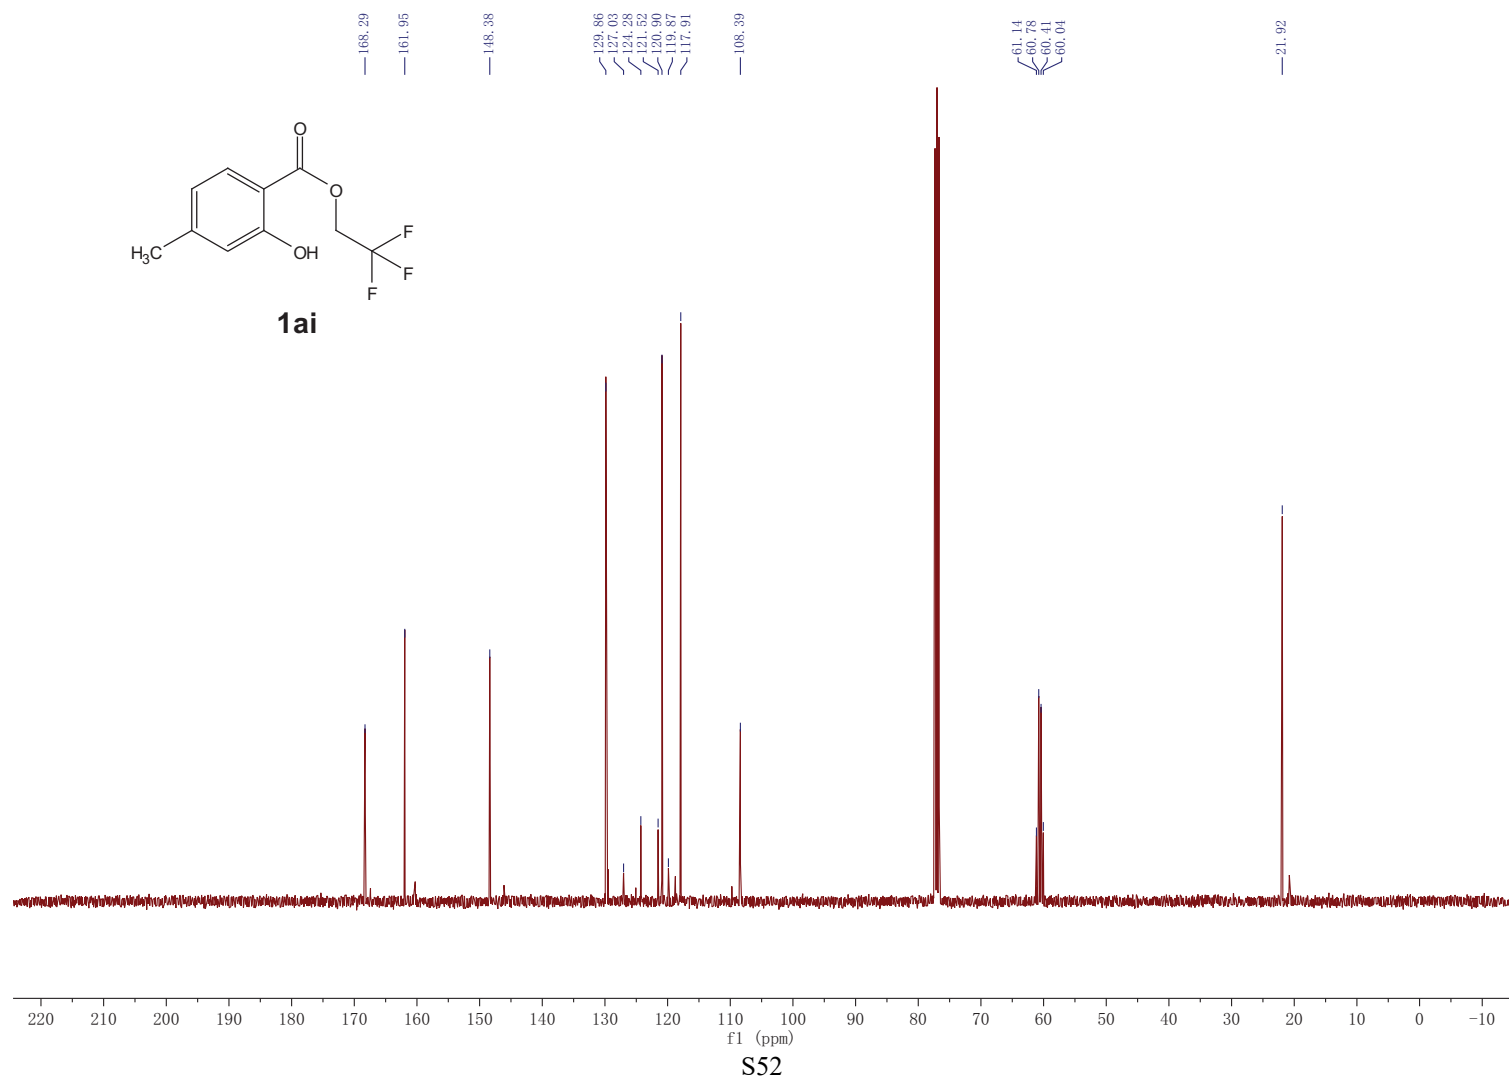

<sup>19</sup>F NMR

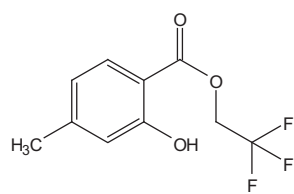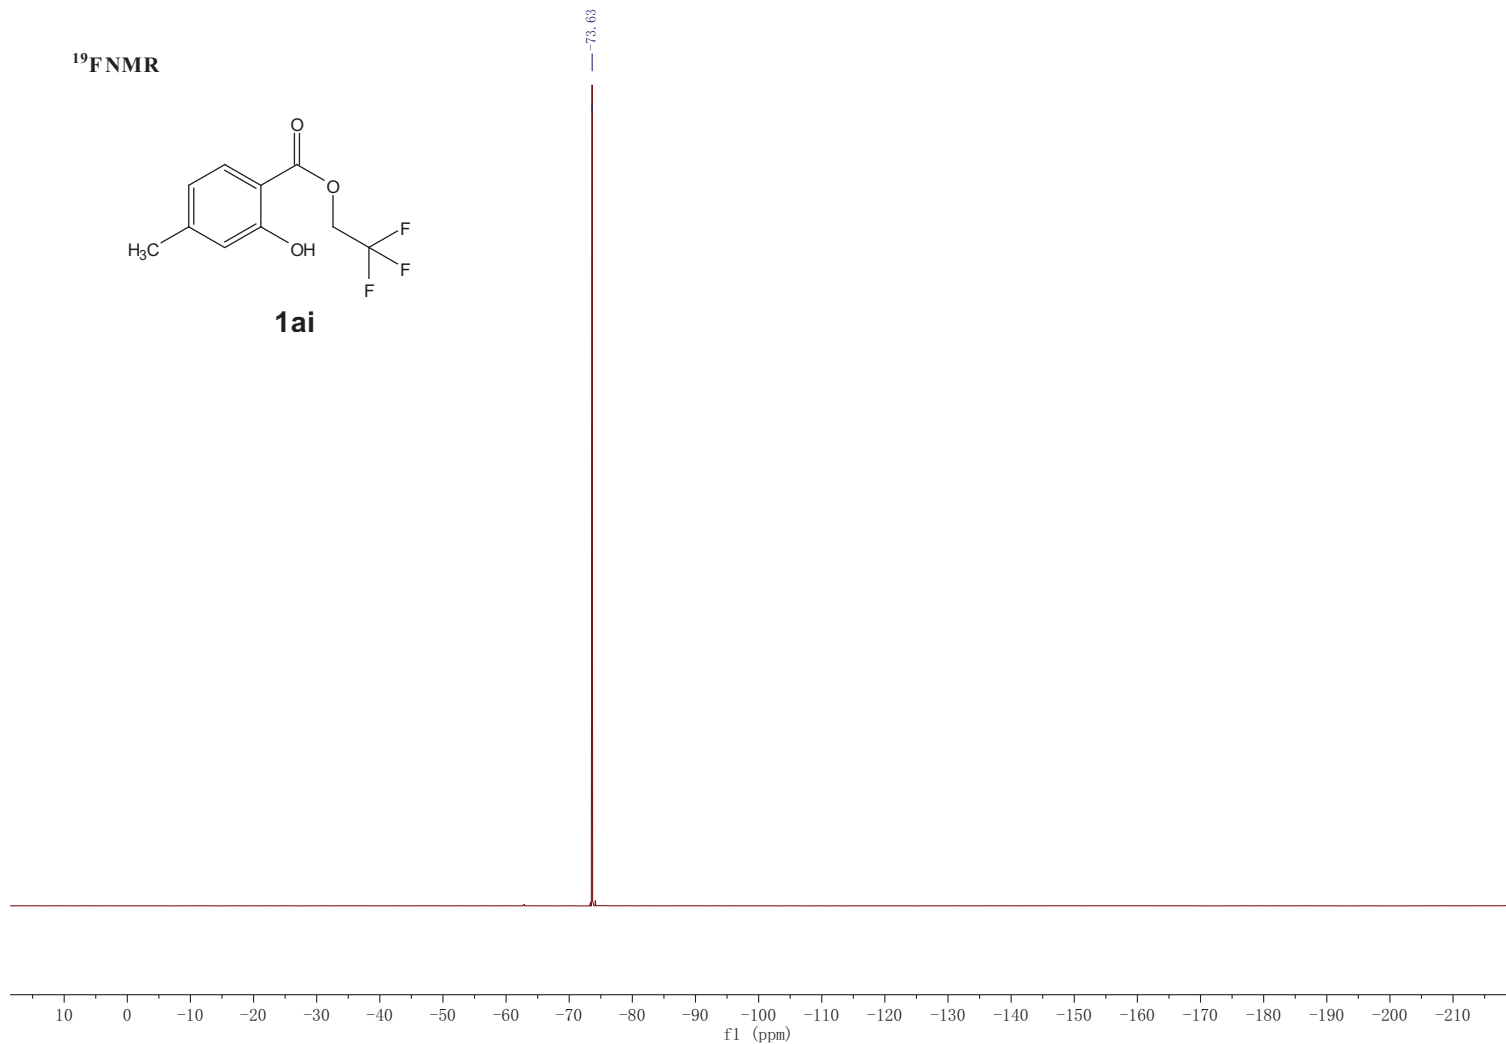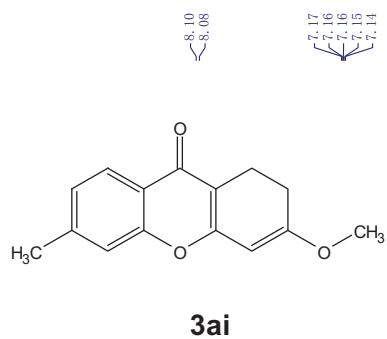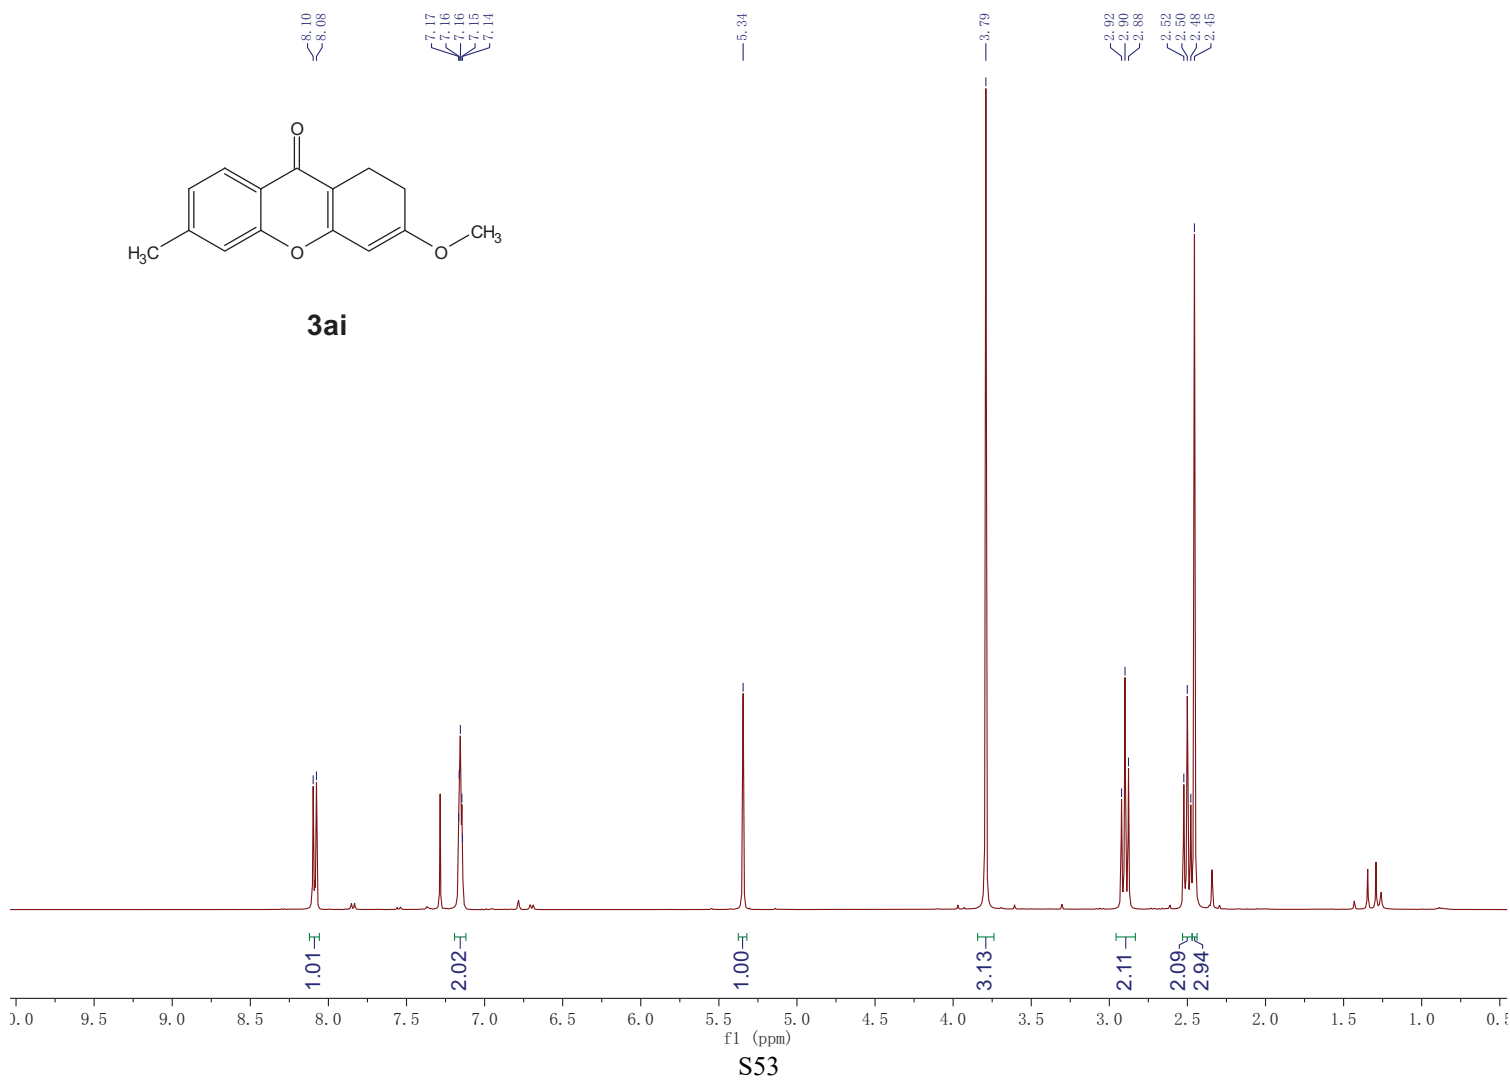

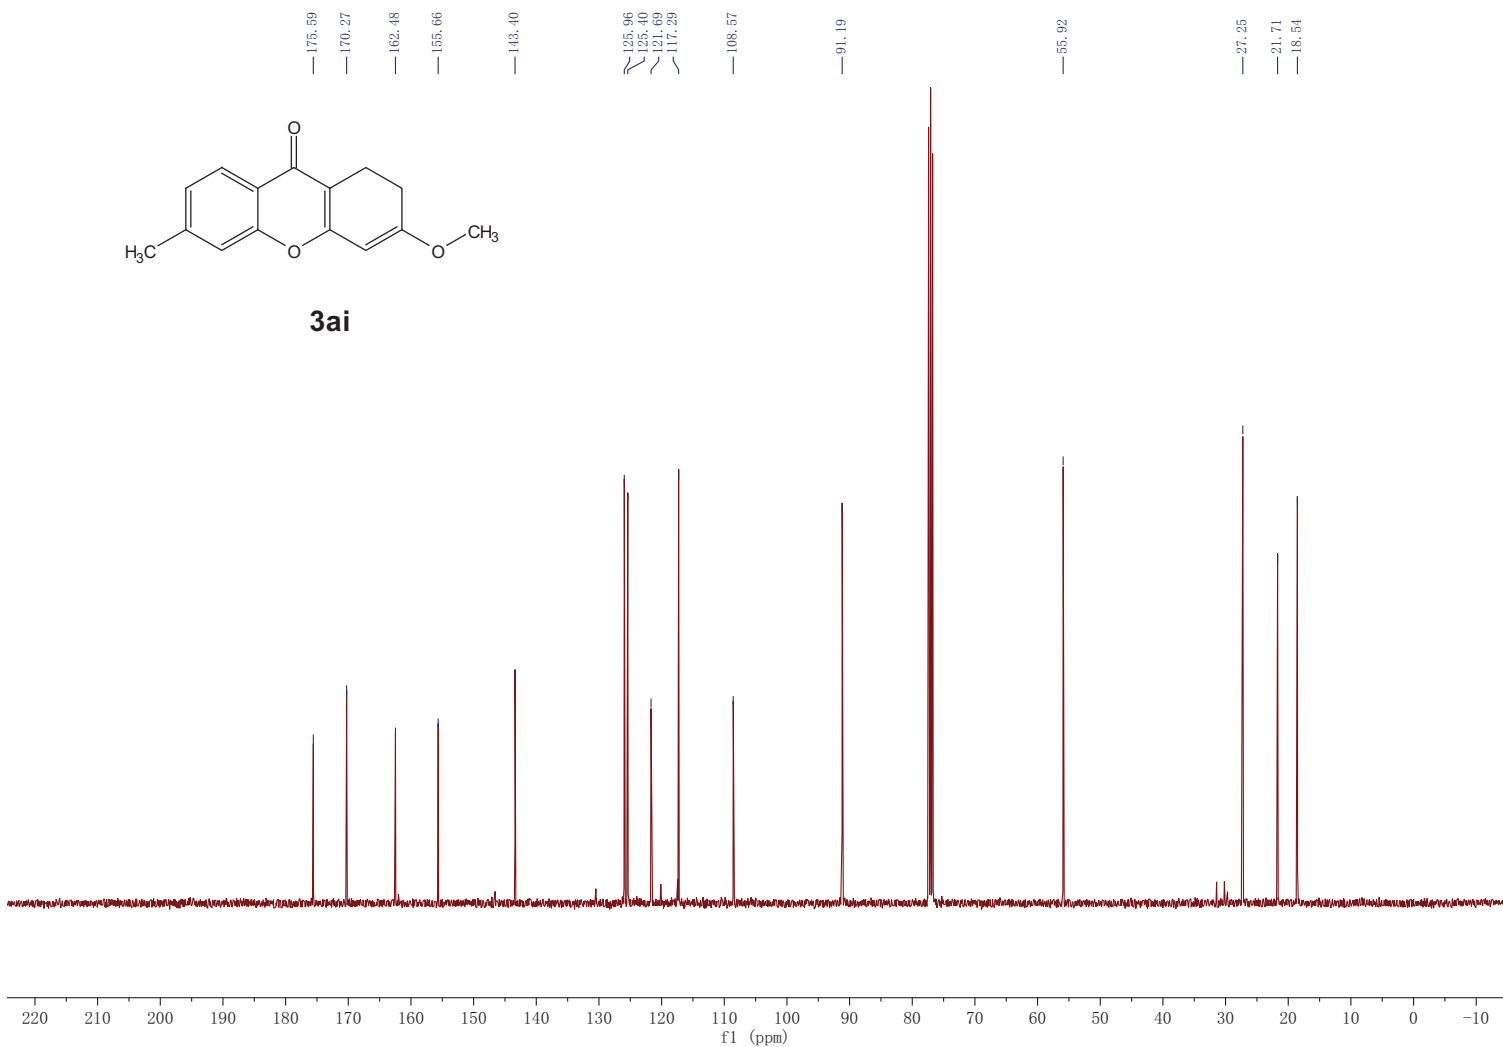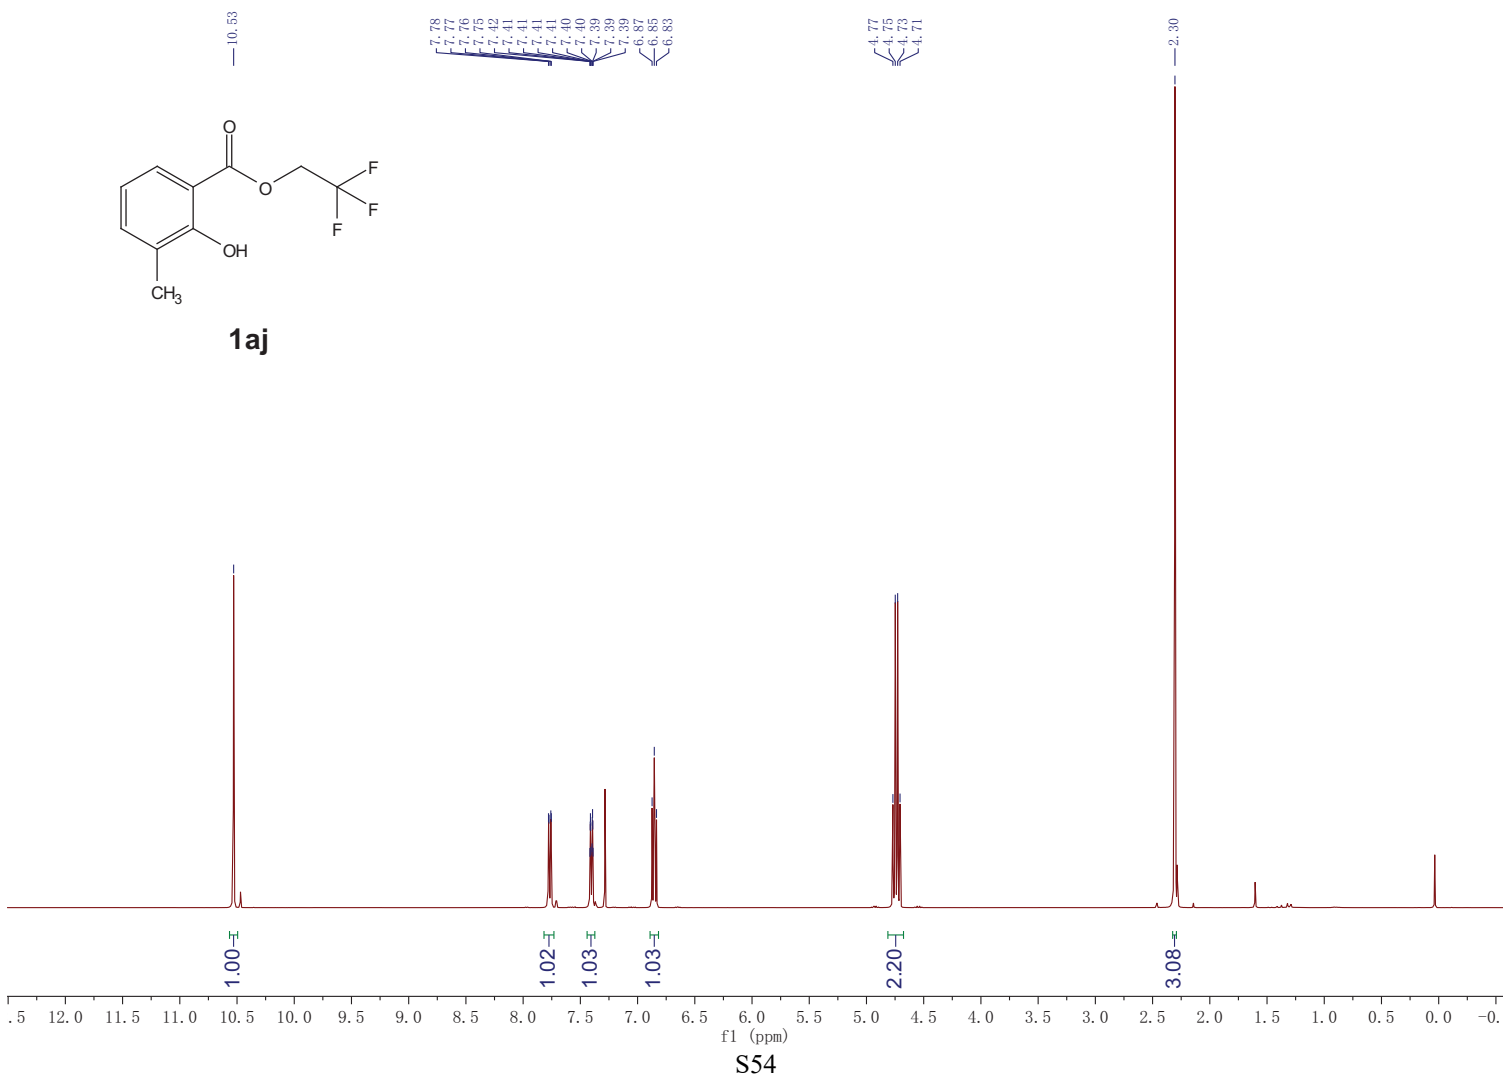

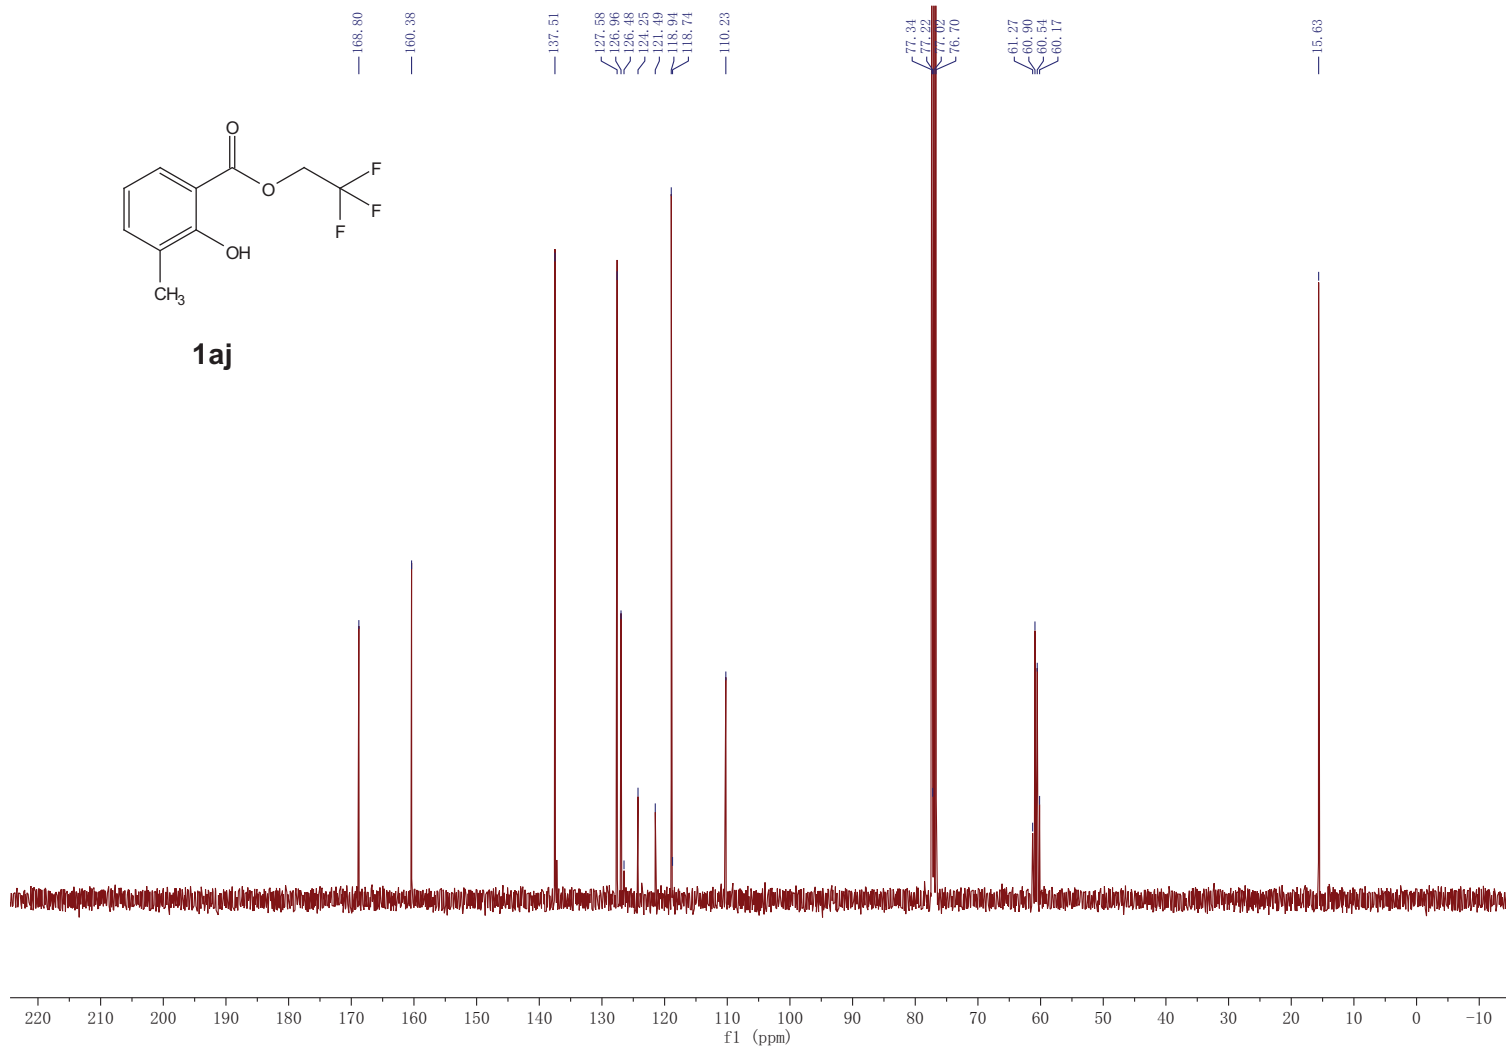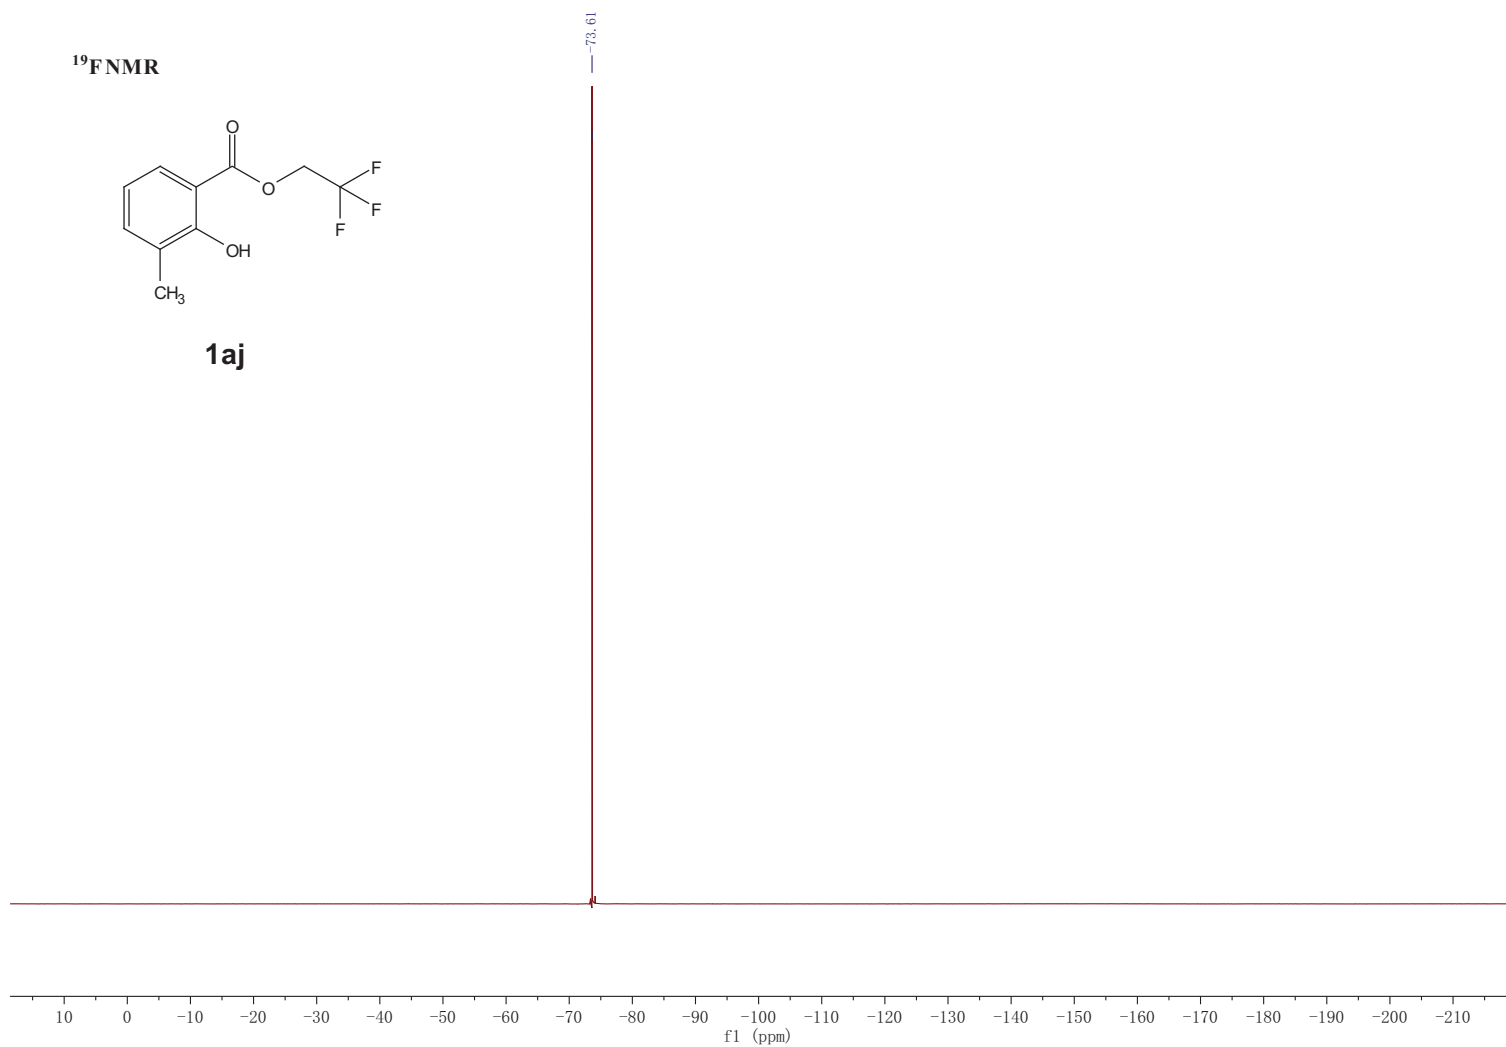

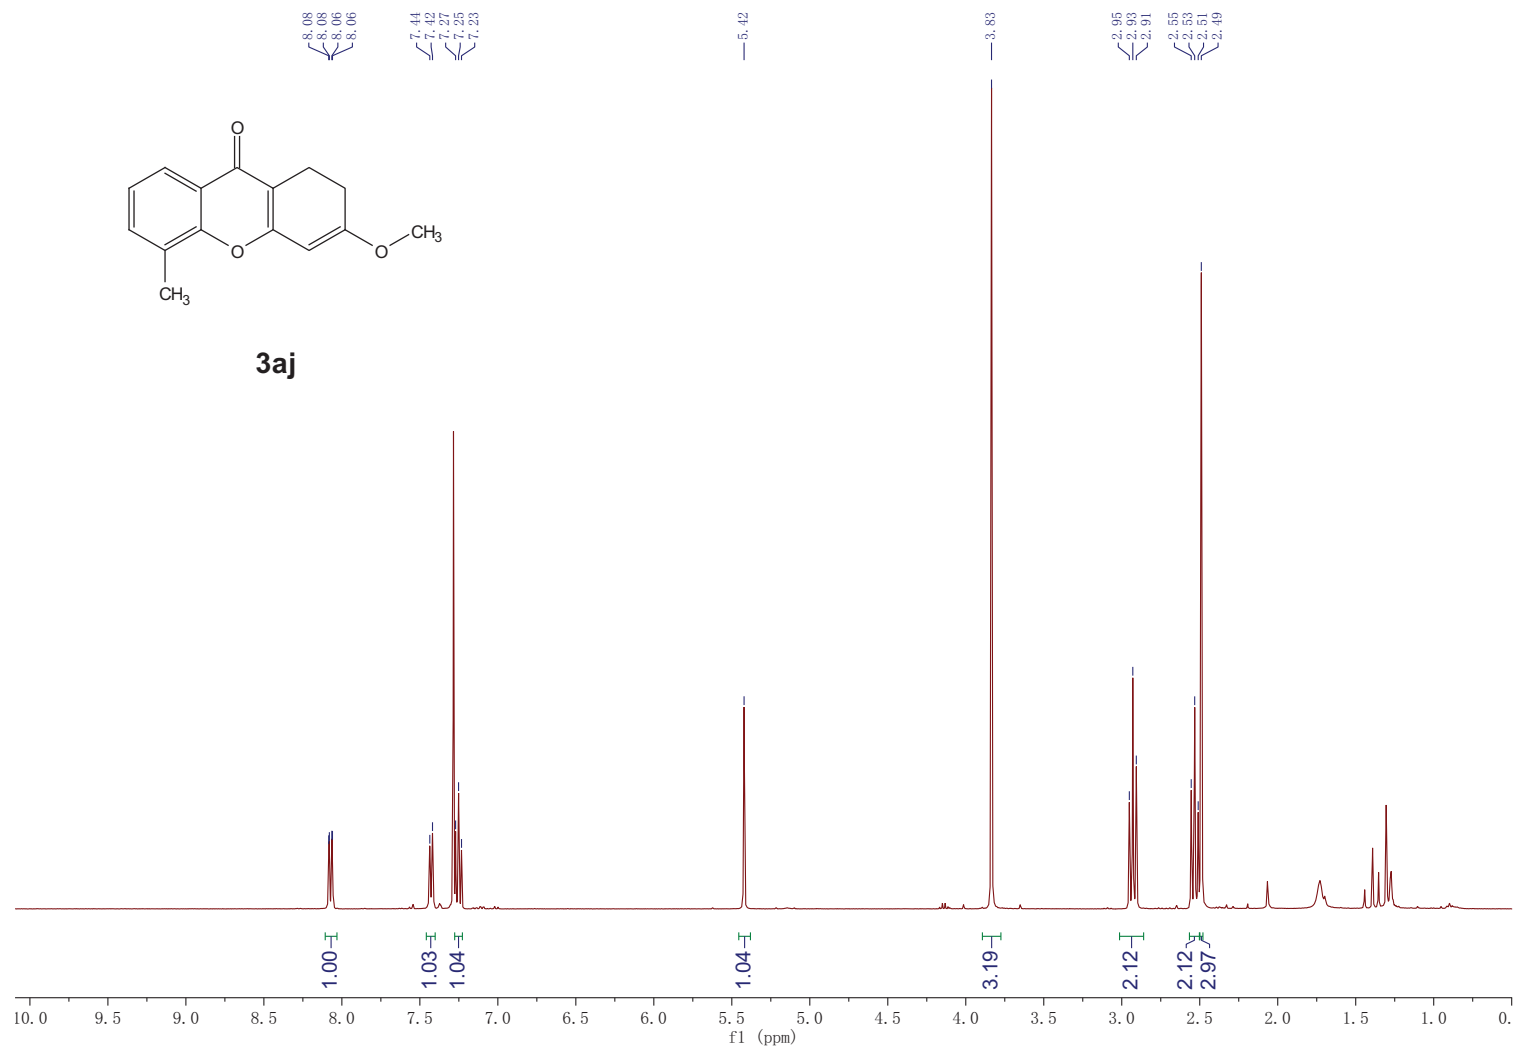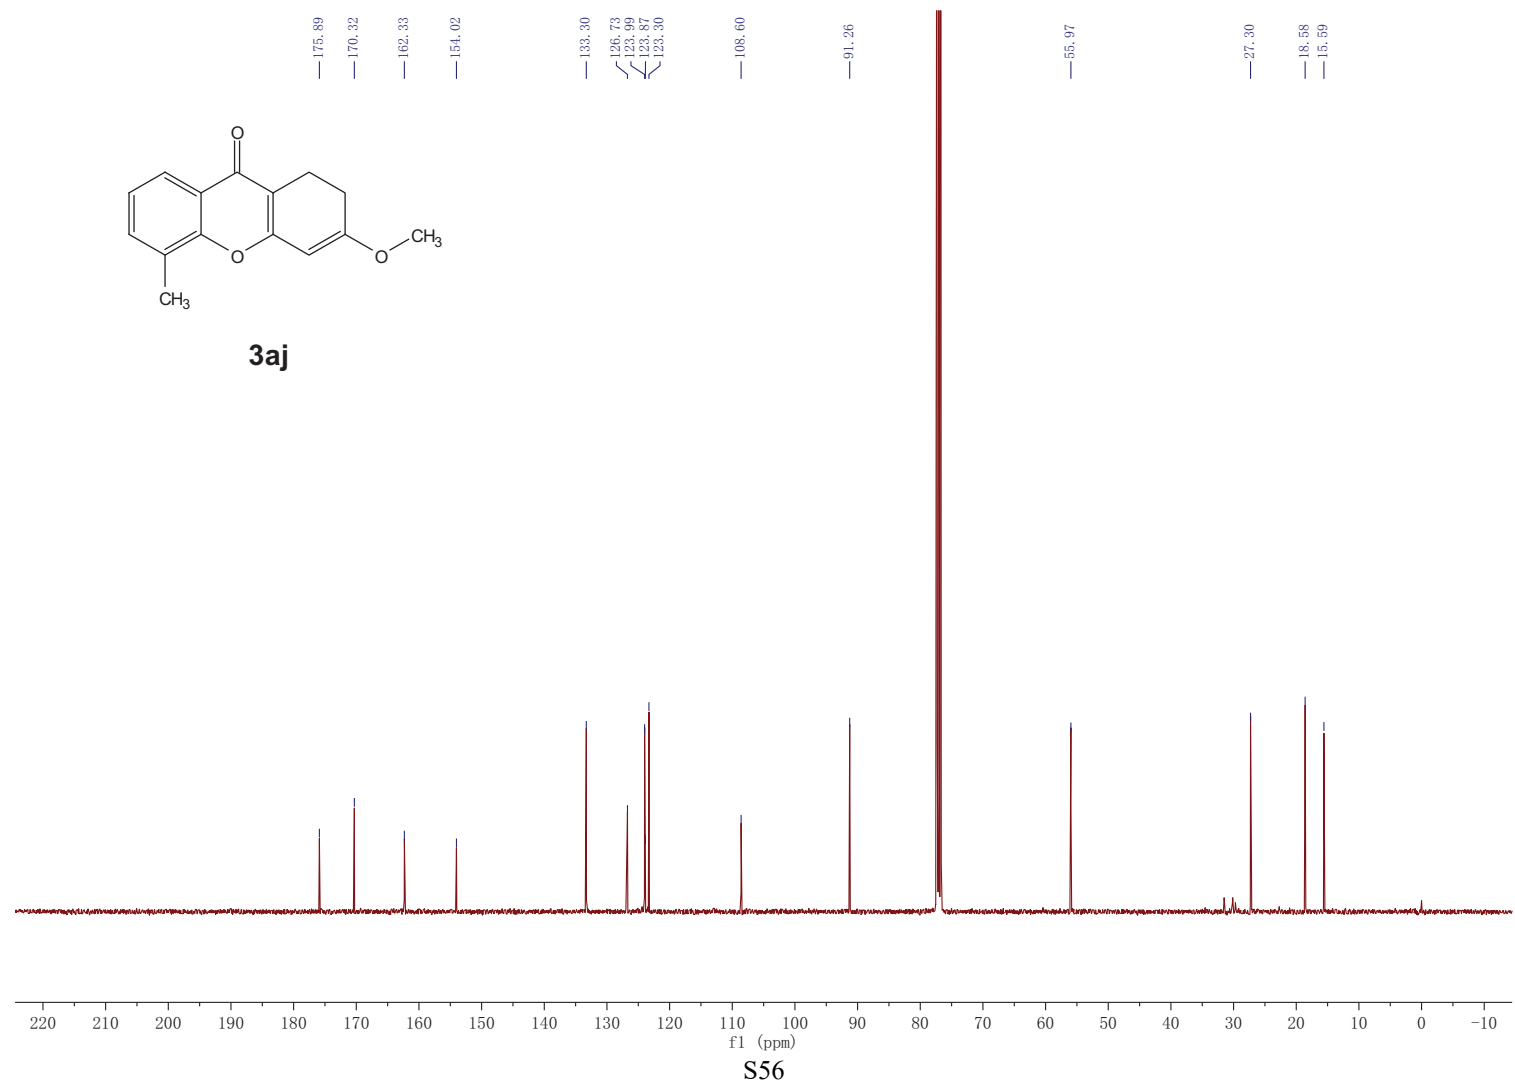



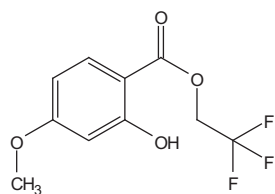

**1ak**

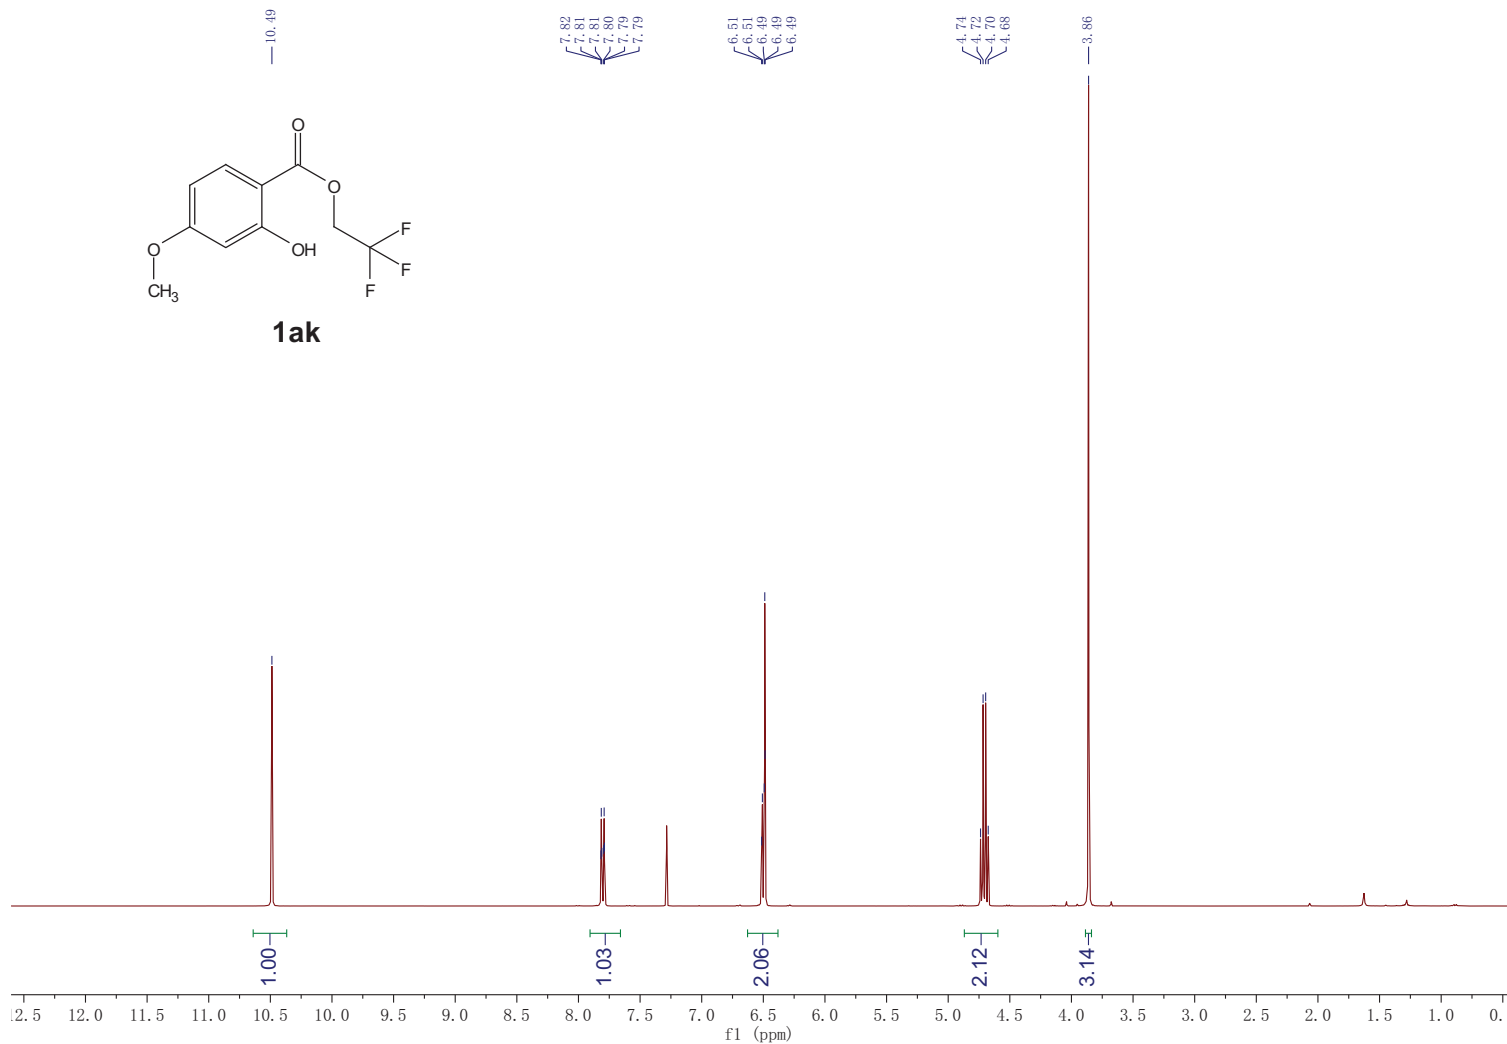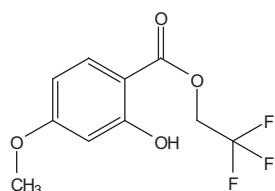

**1ak**

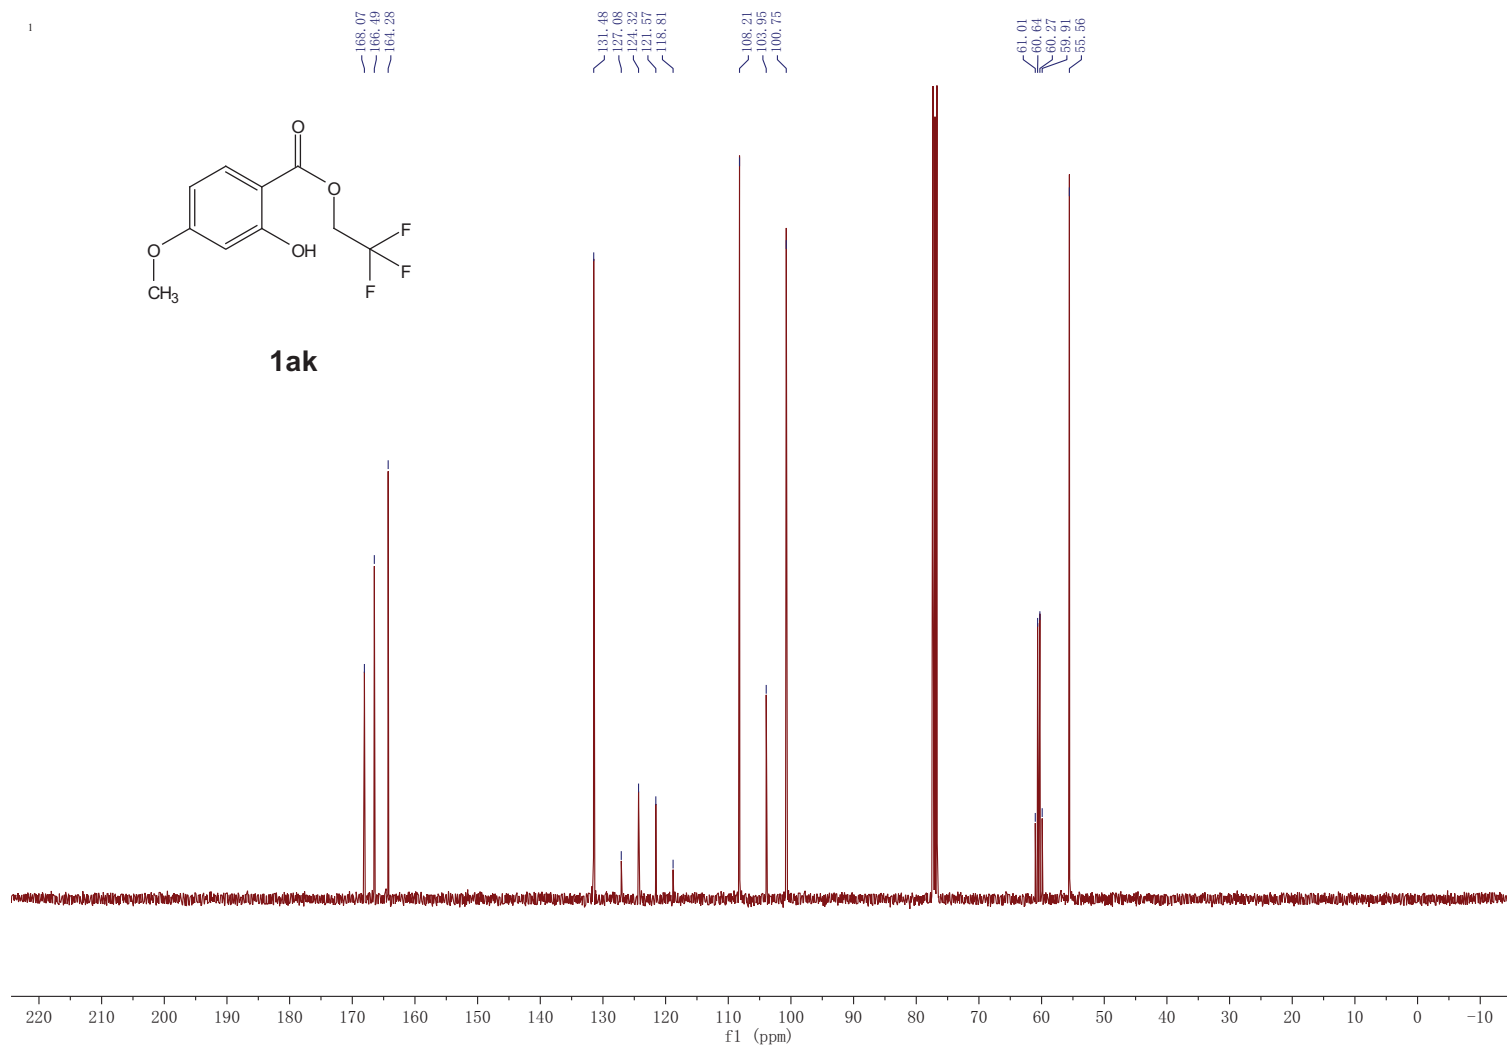

<sup>19</sup>F NMR

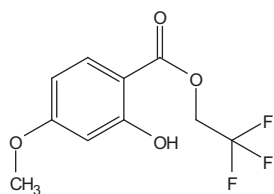

**1ak**

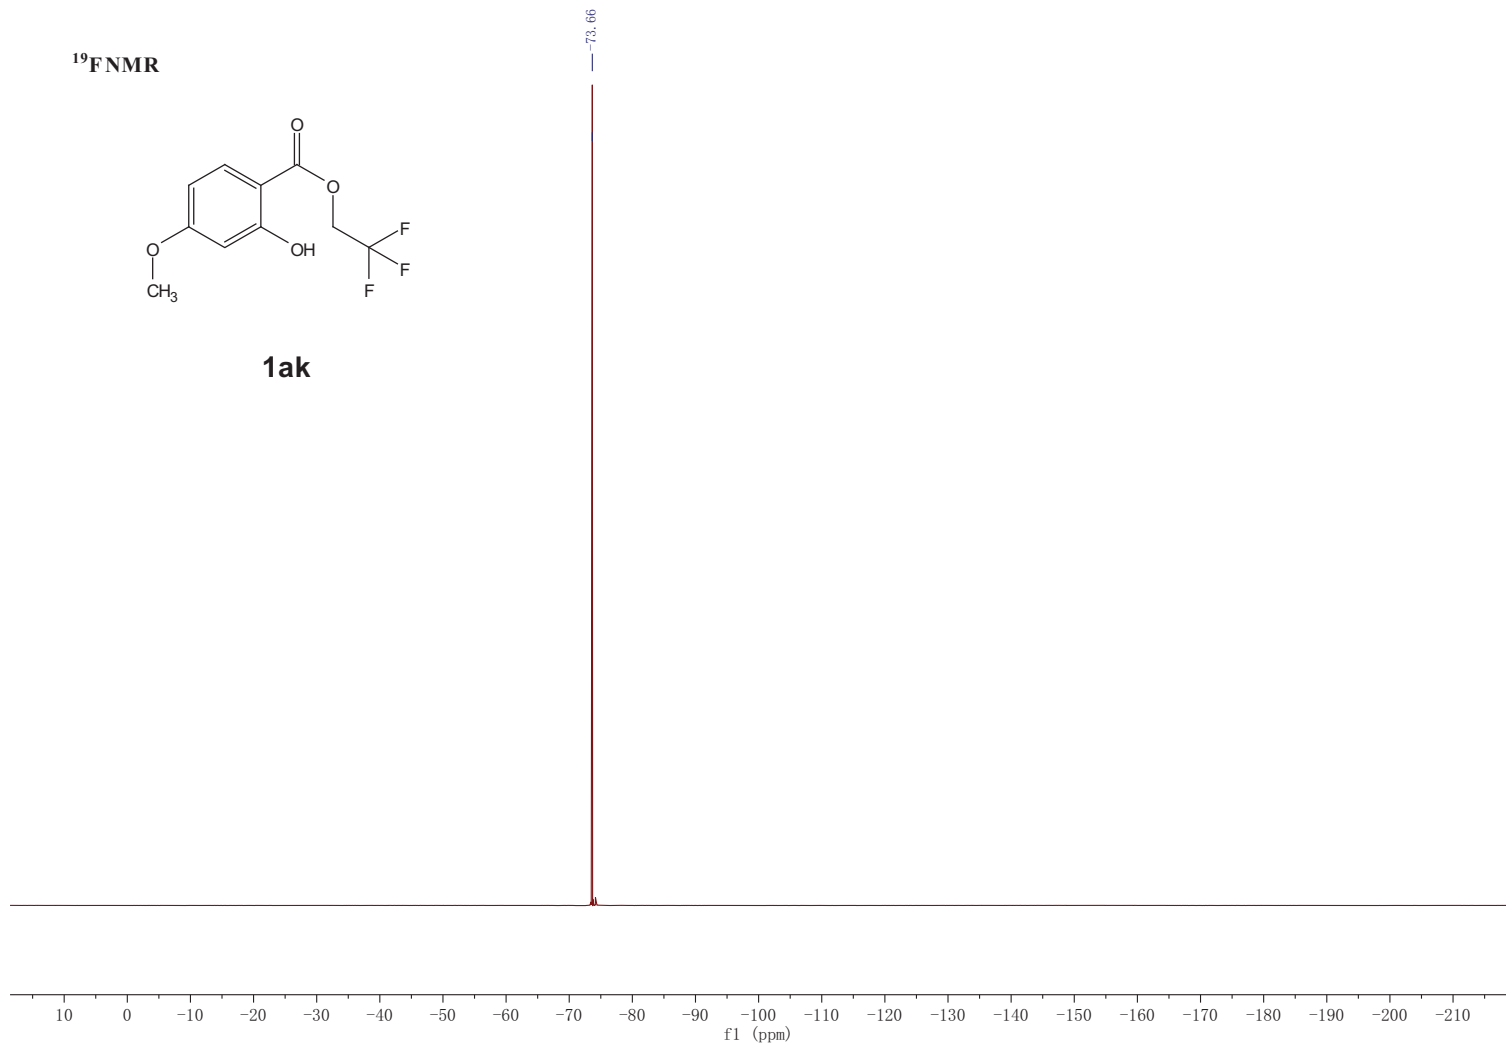

8.14

8.12

6.95

6.94

6.93

6.90

6.88

6.81

5.35

3.90

3.81

2.92

2.90

2.89

2.58

2.52

2.50

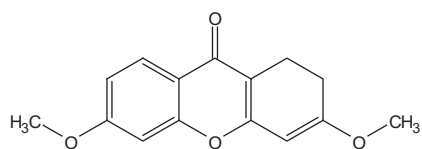

**3ak**

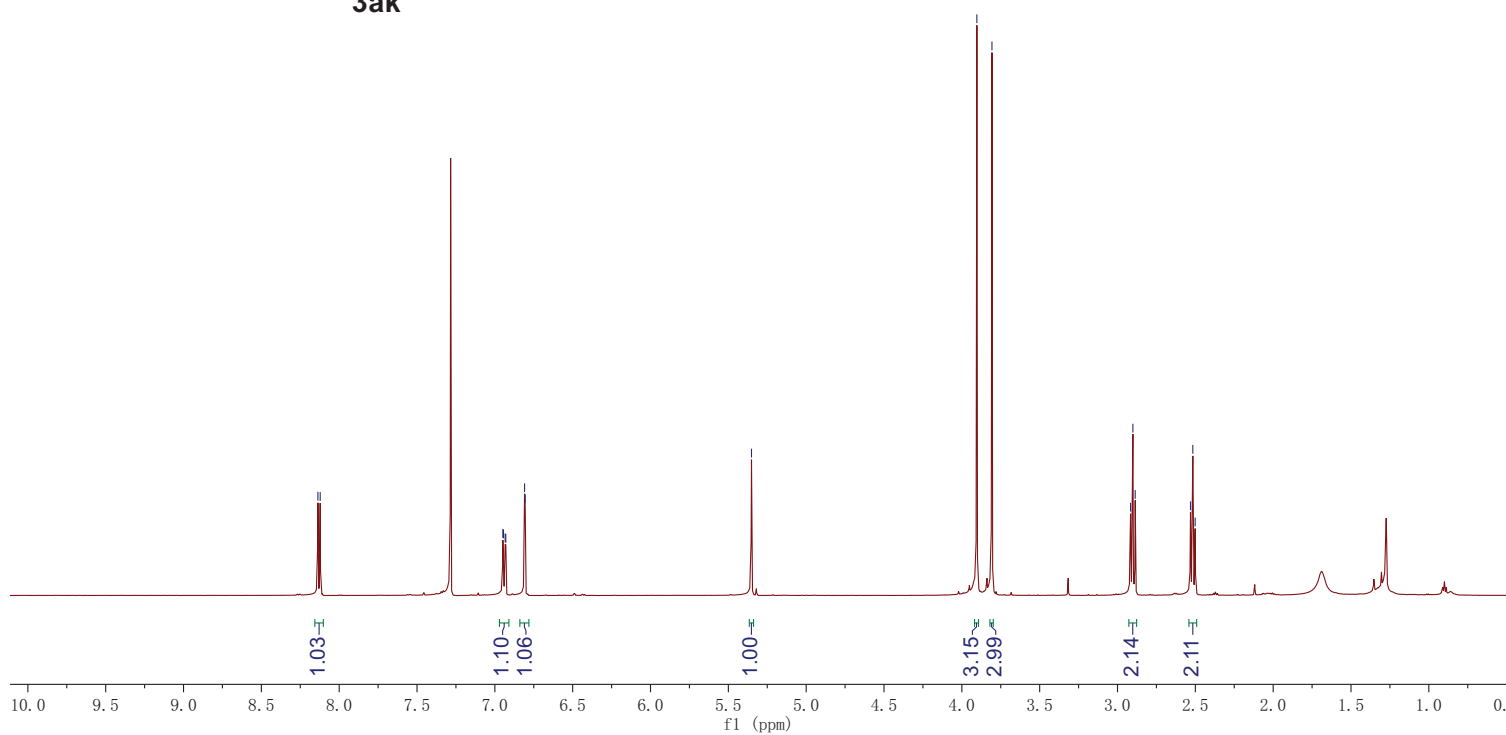

S58

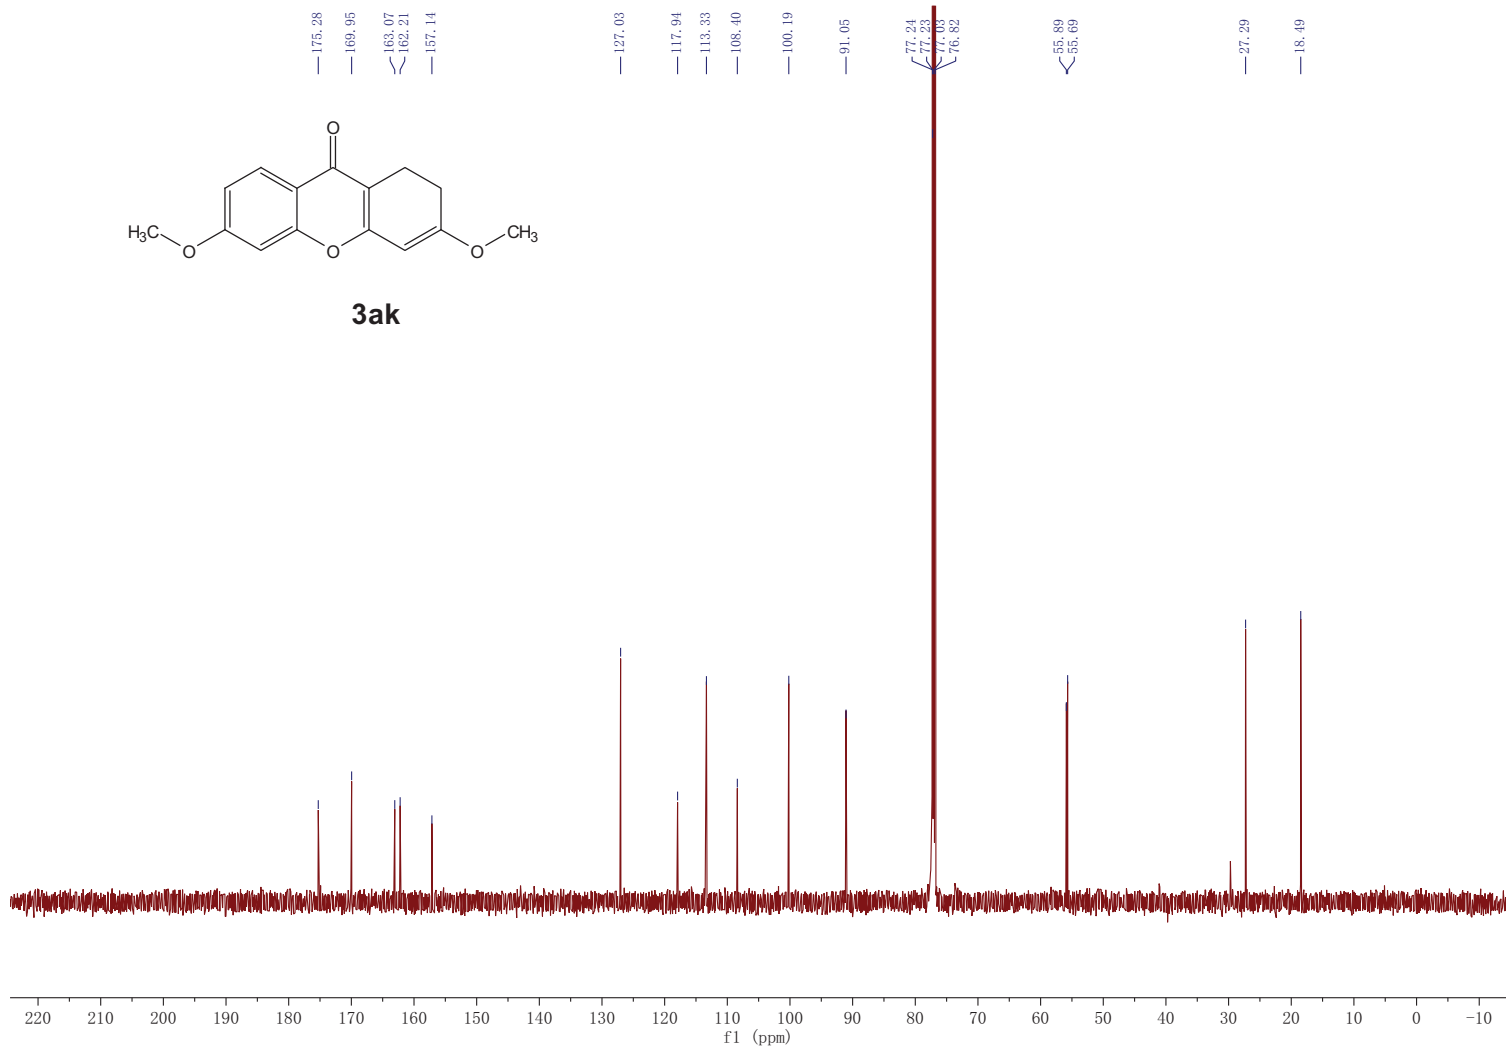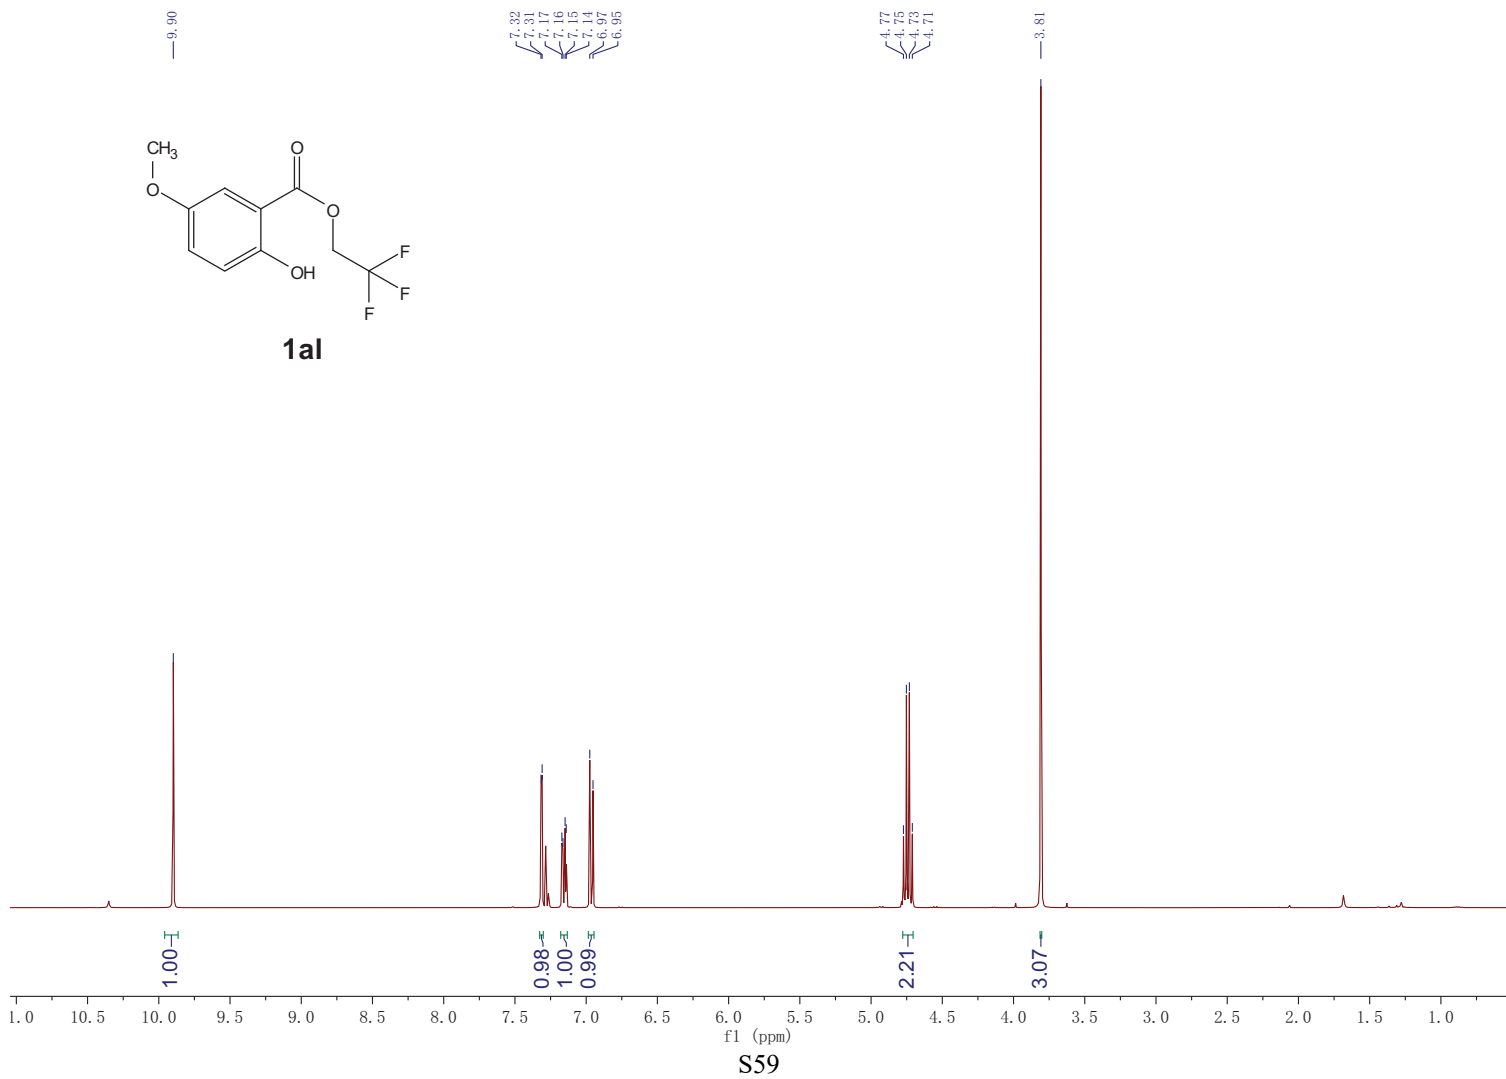

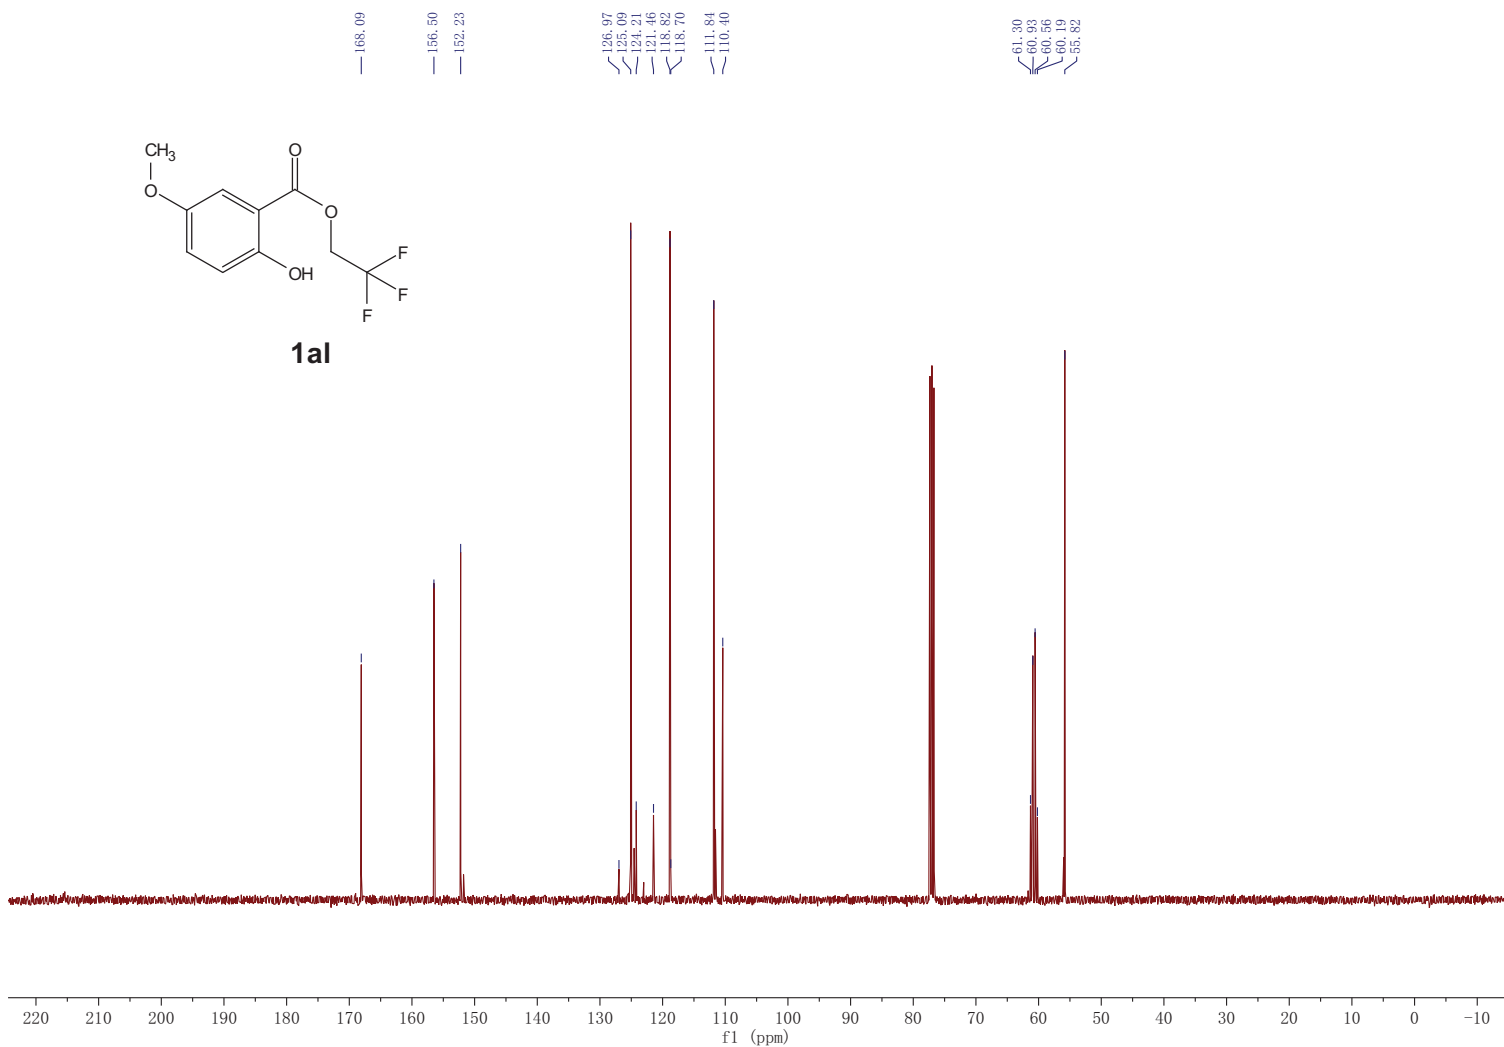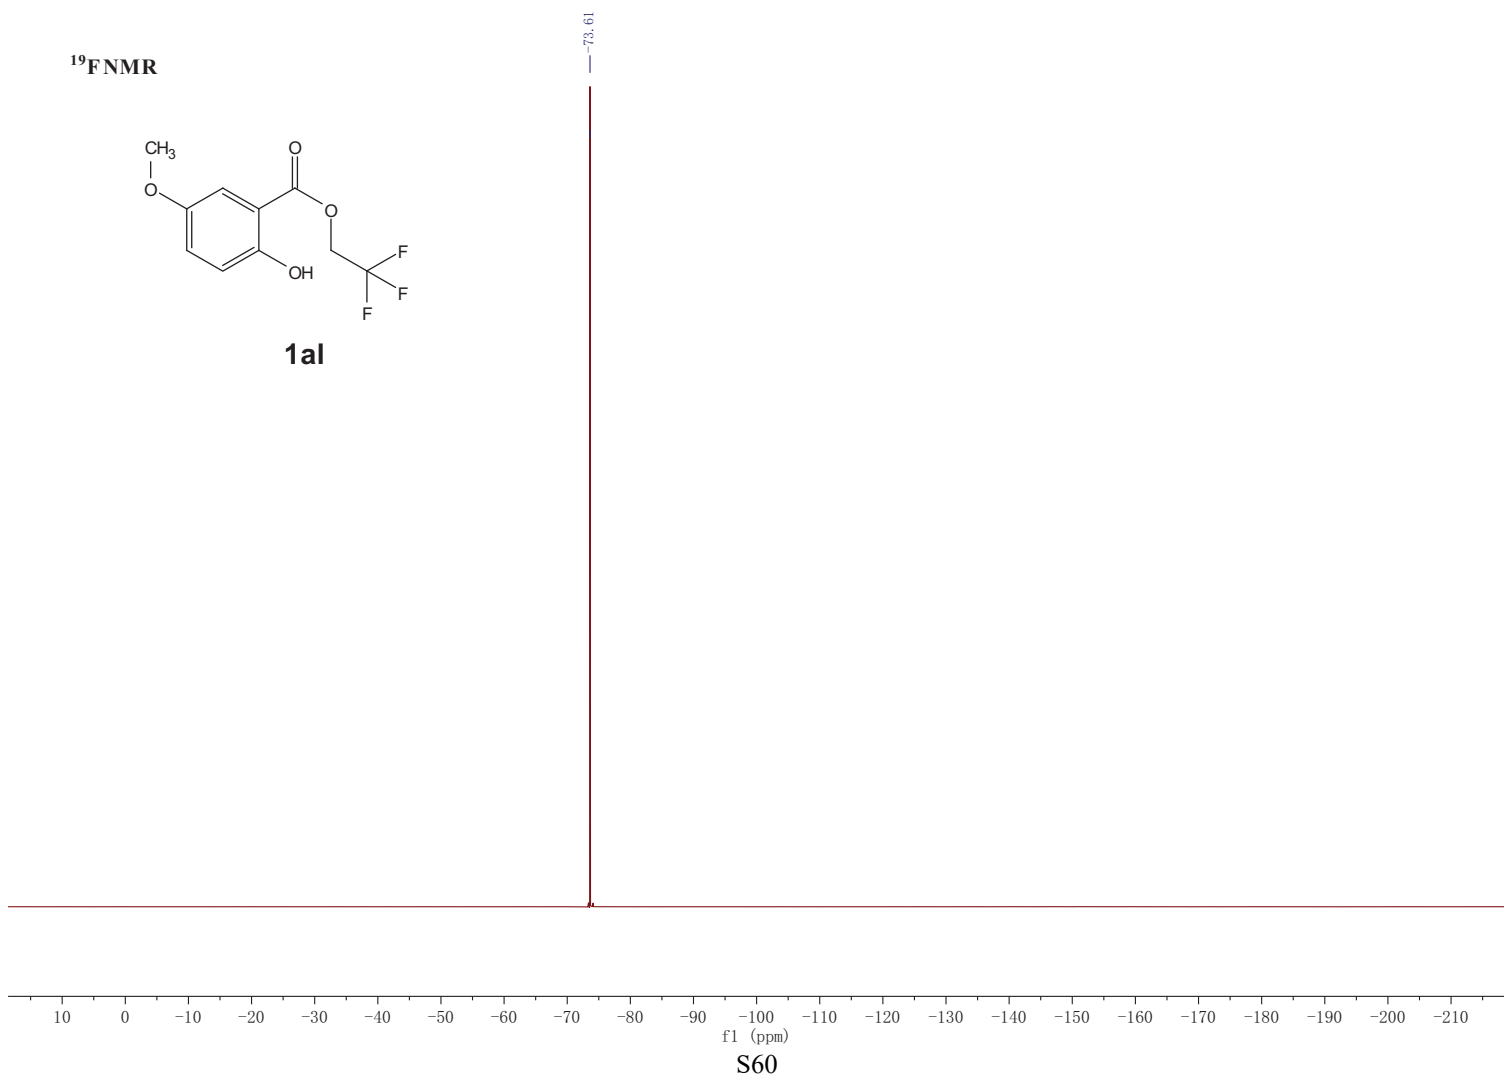

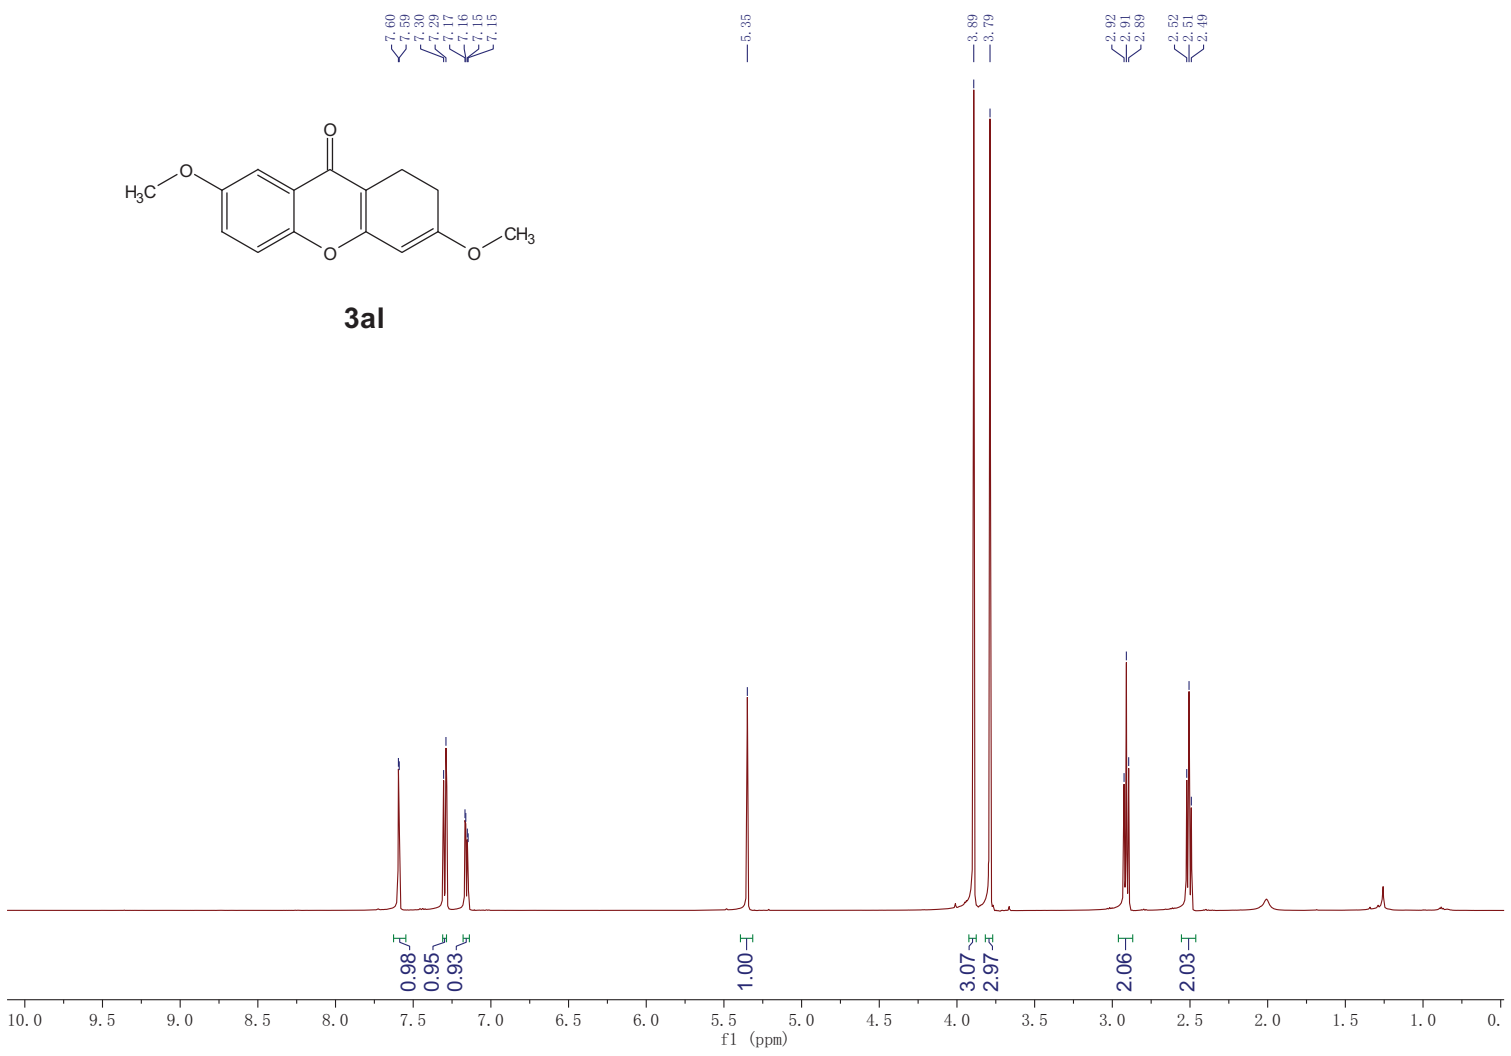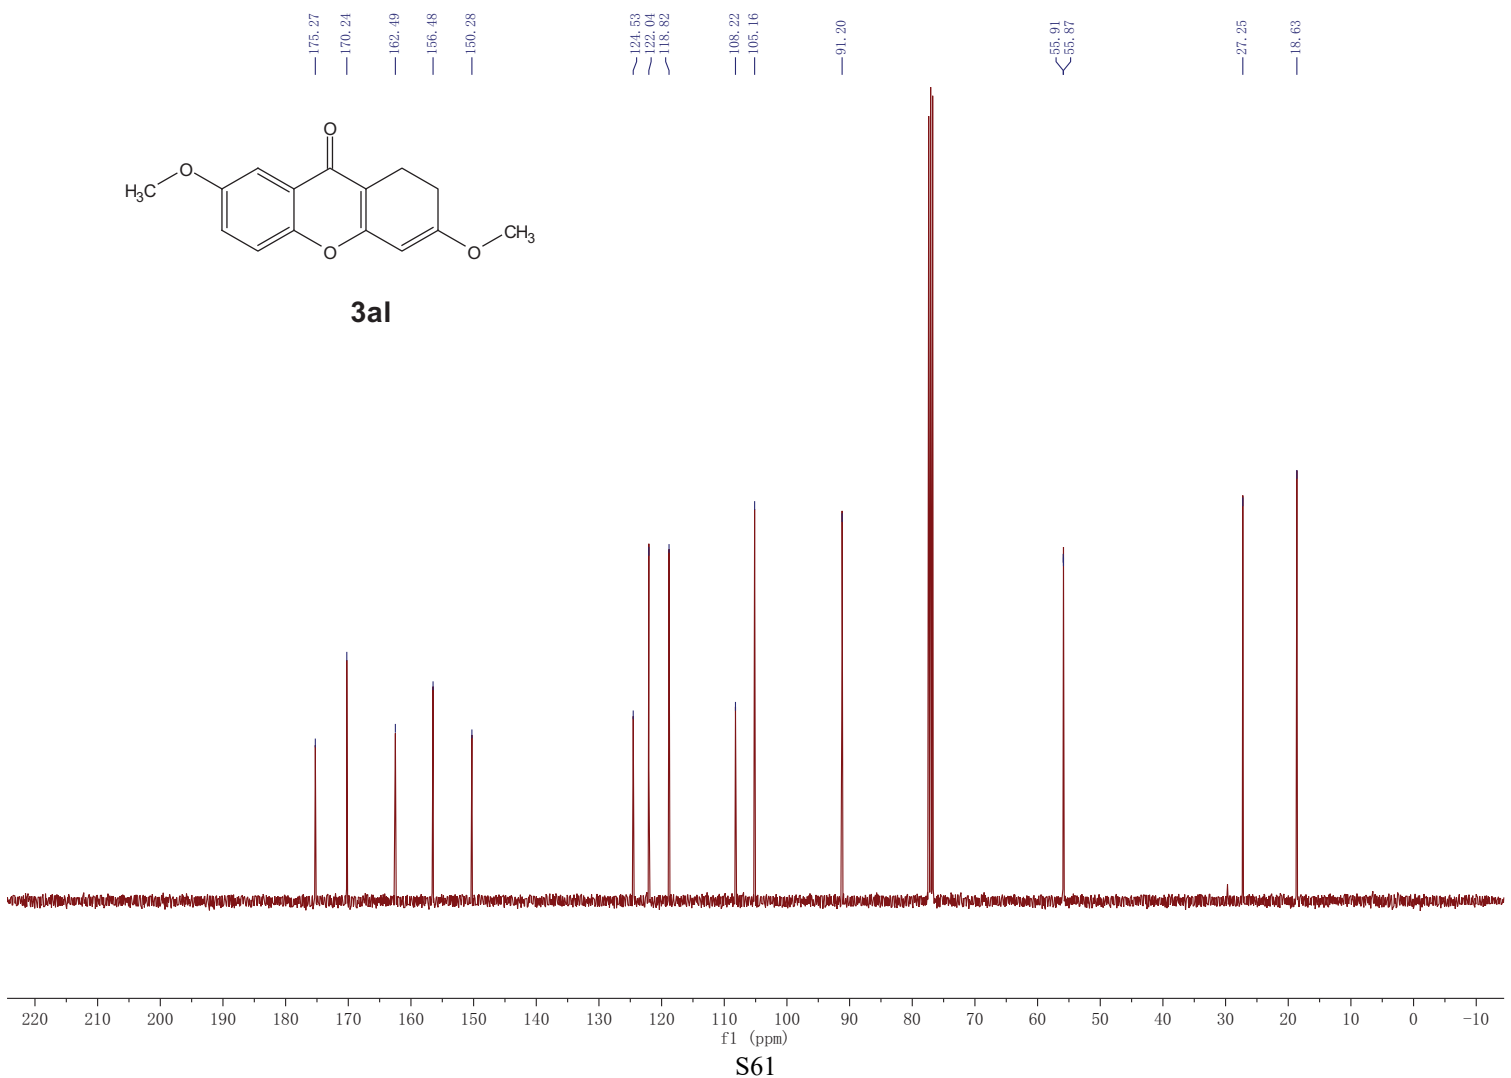

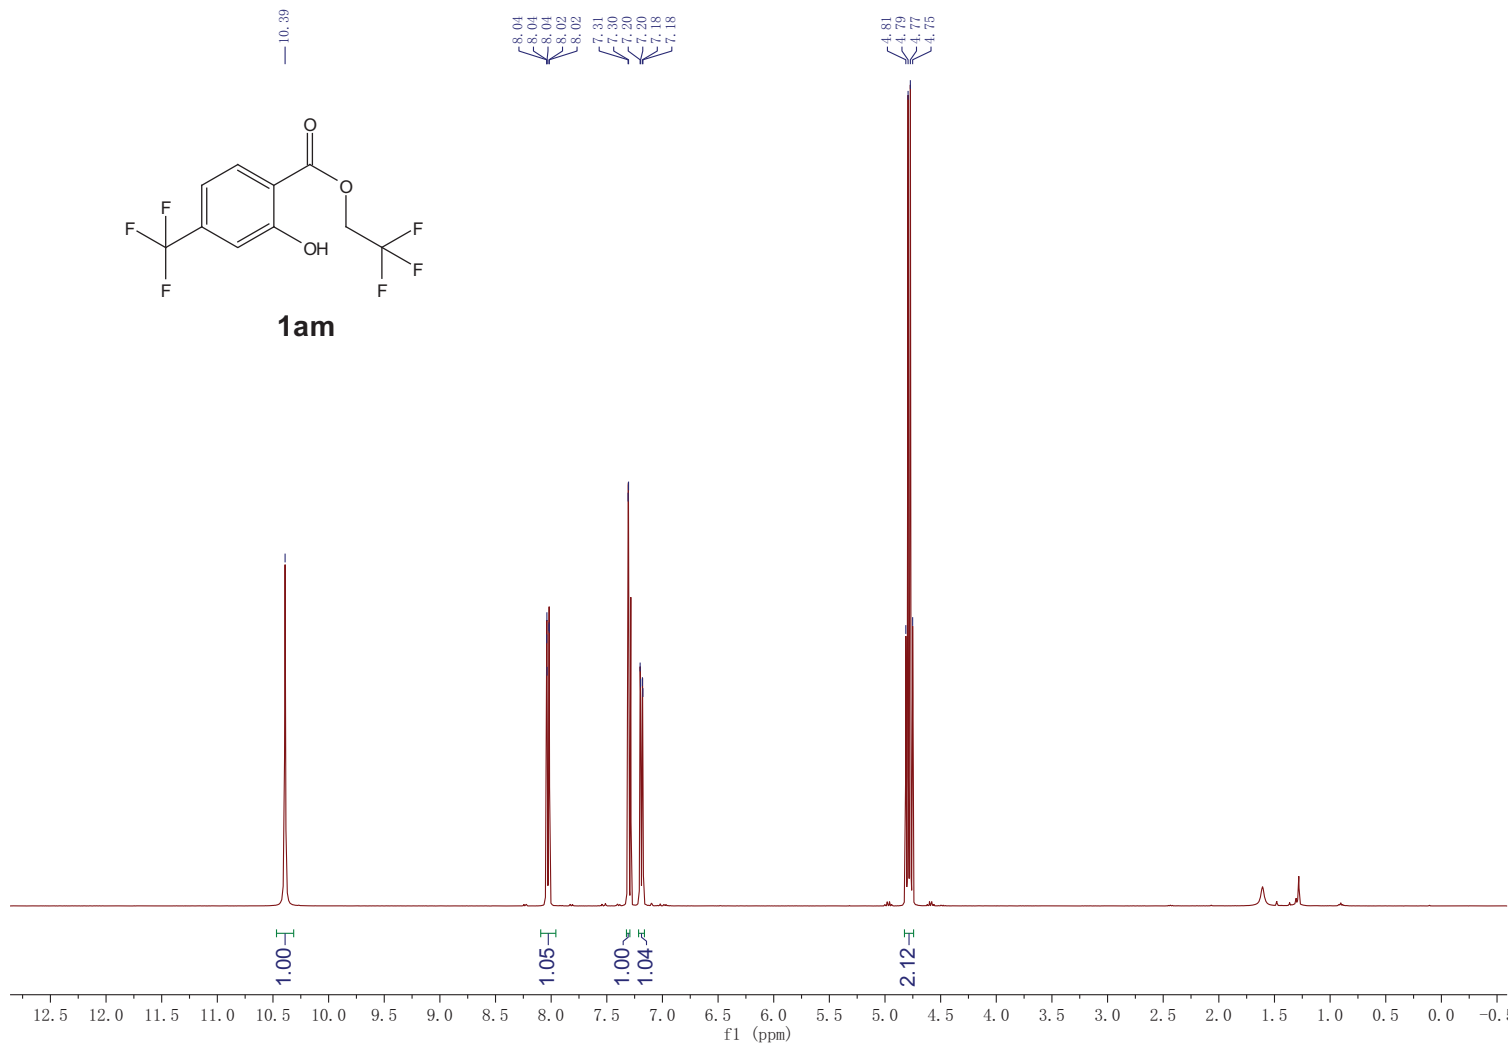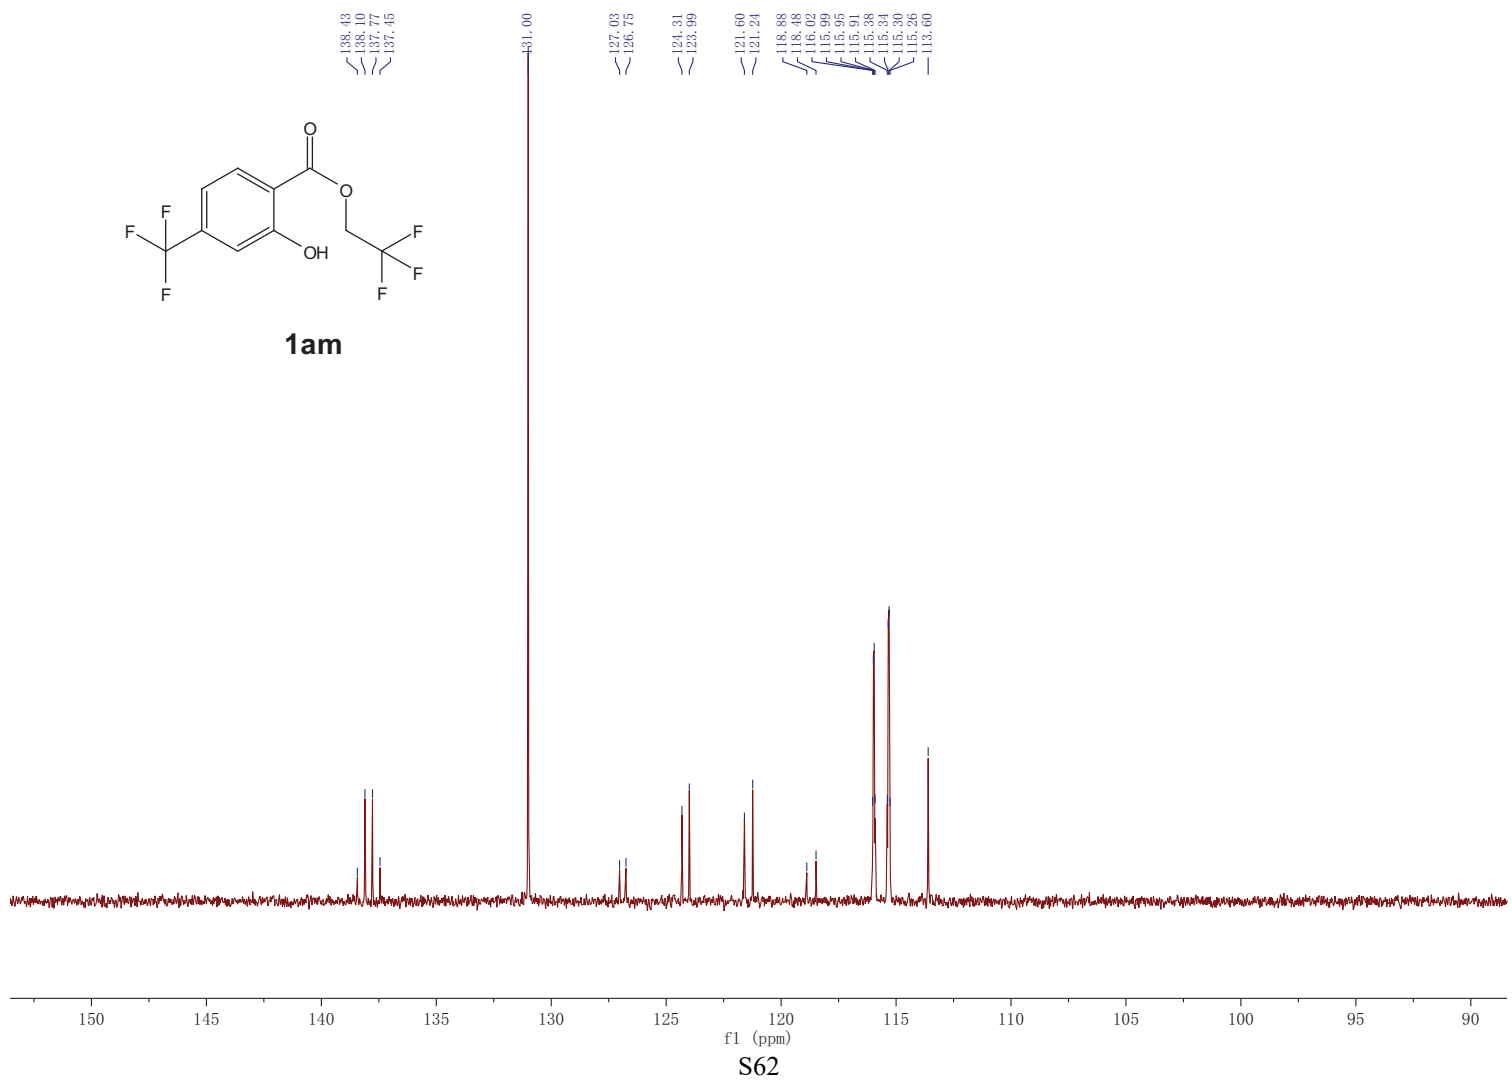

<sup>19</sup>F NMR

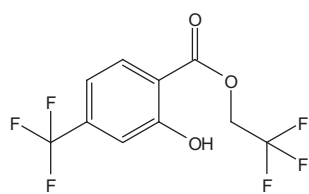

**1am**

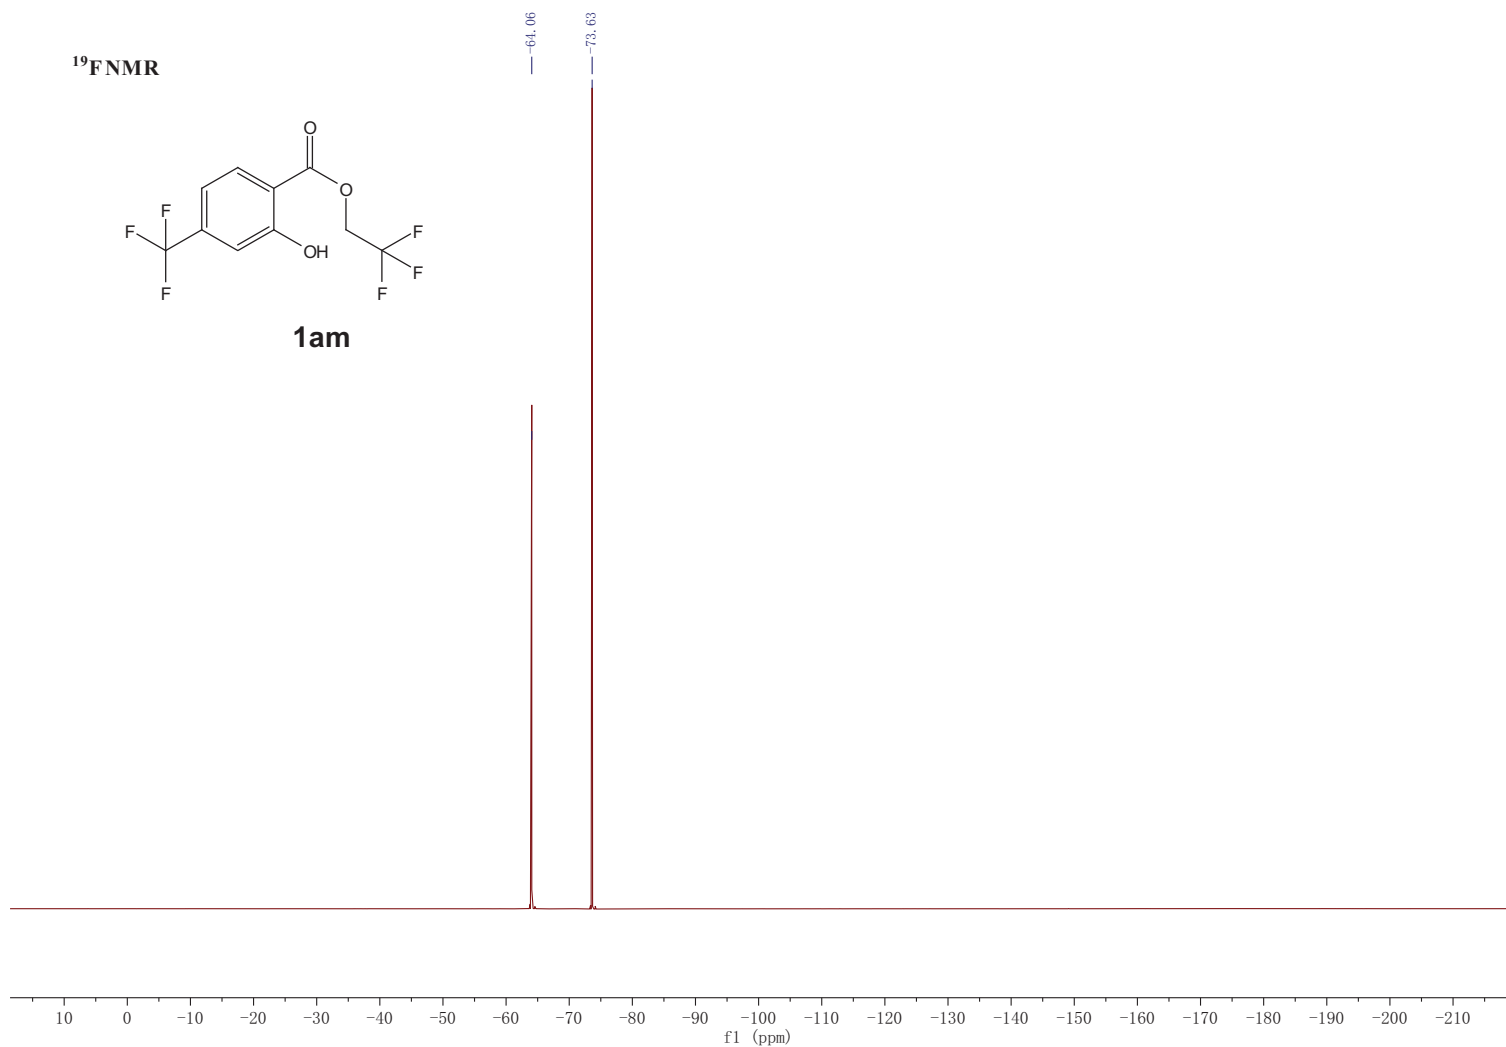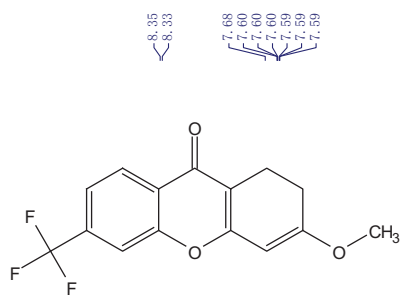

**3am**

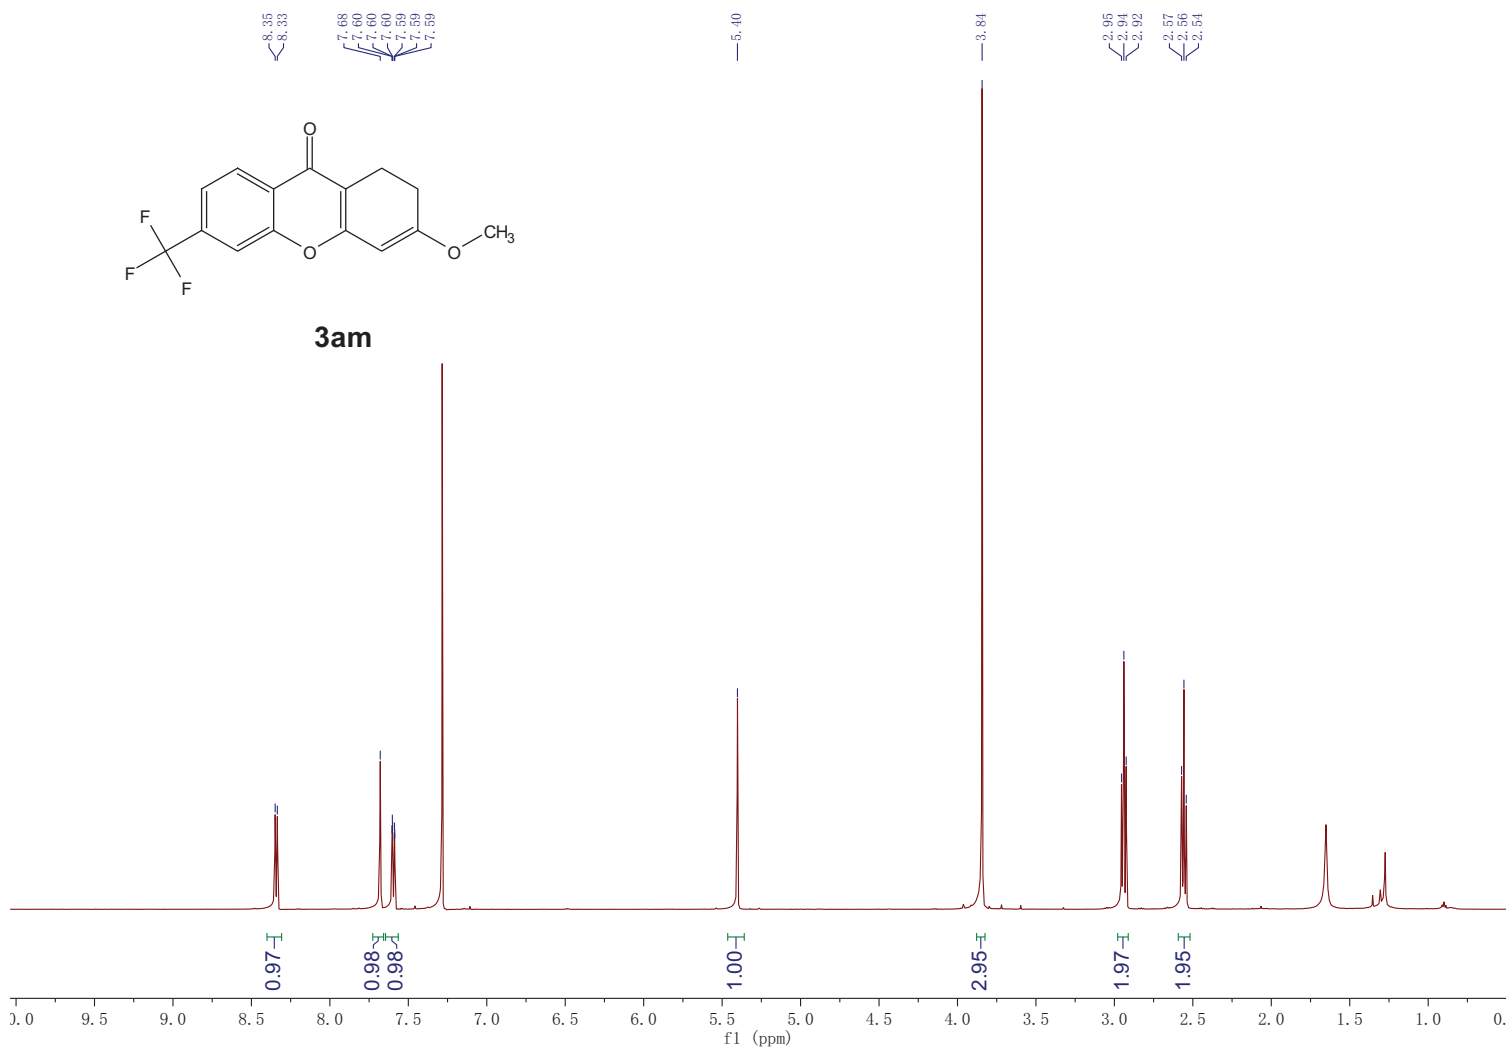

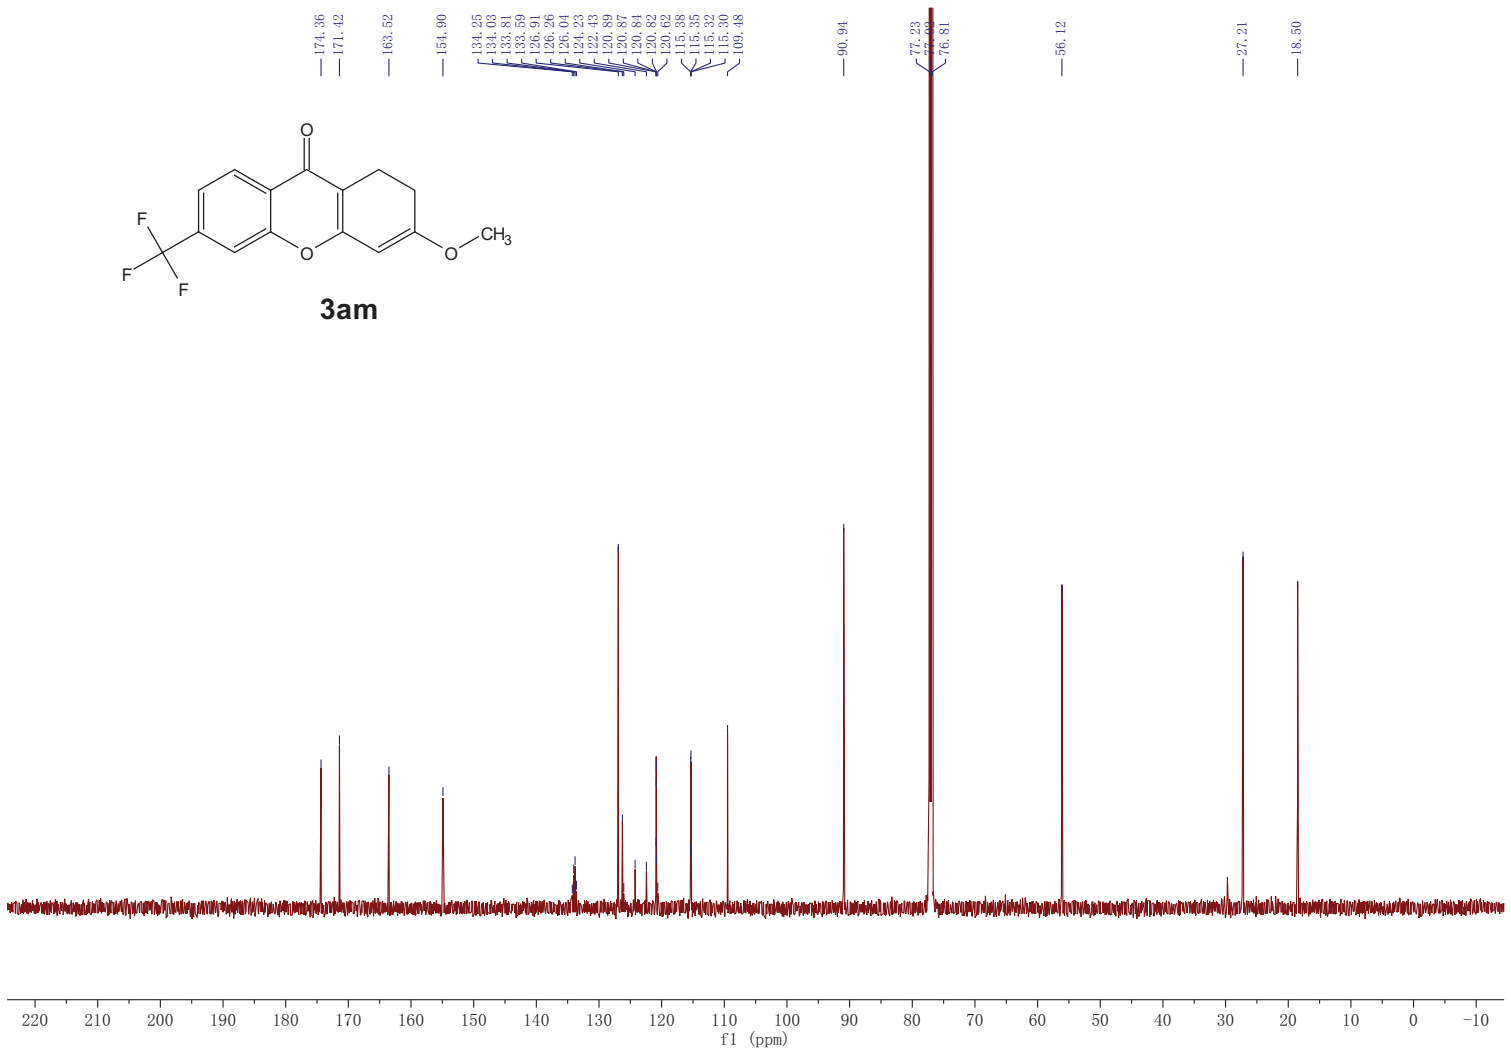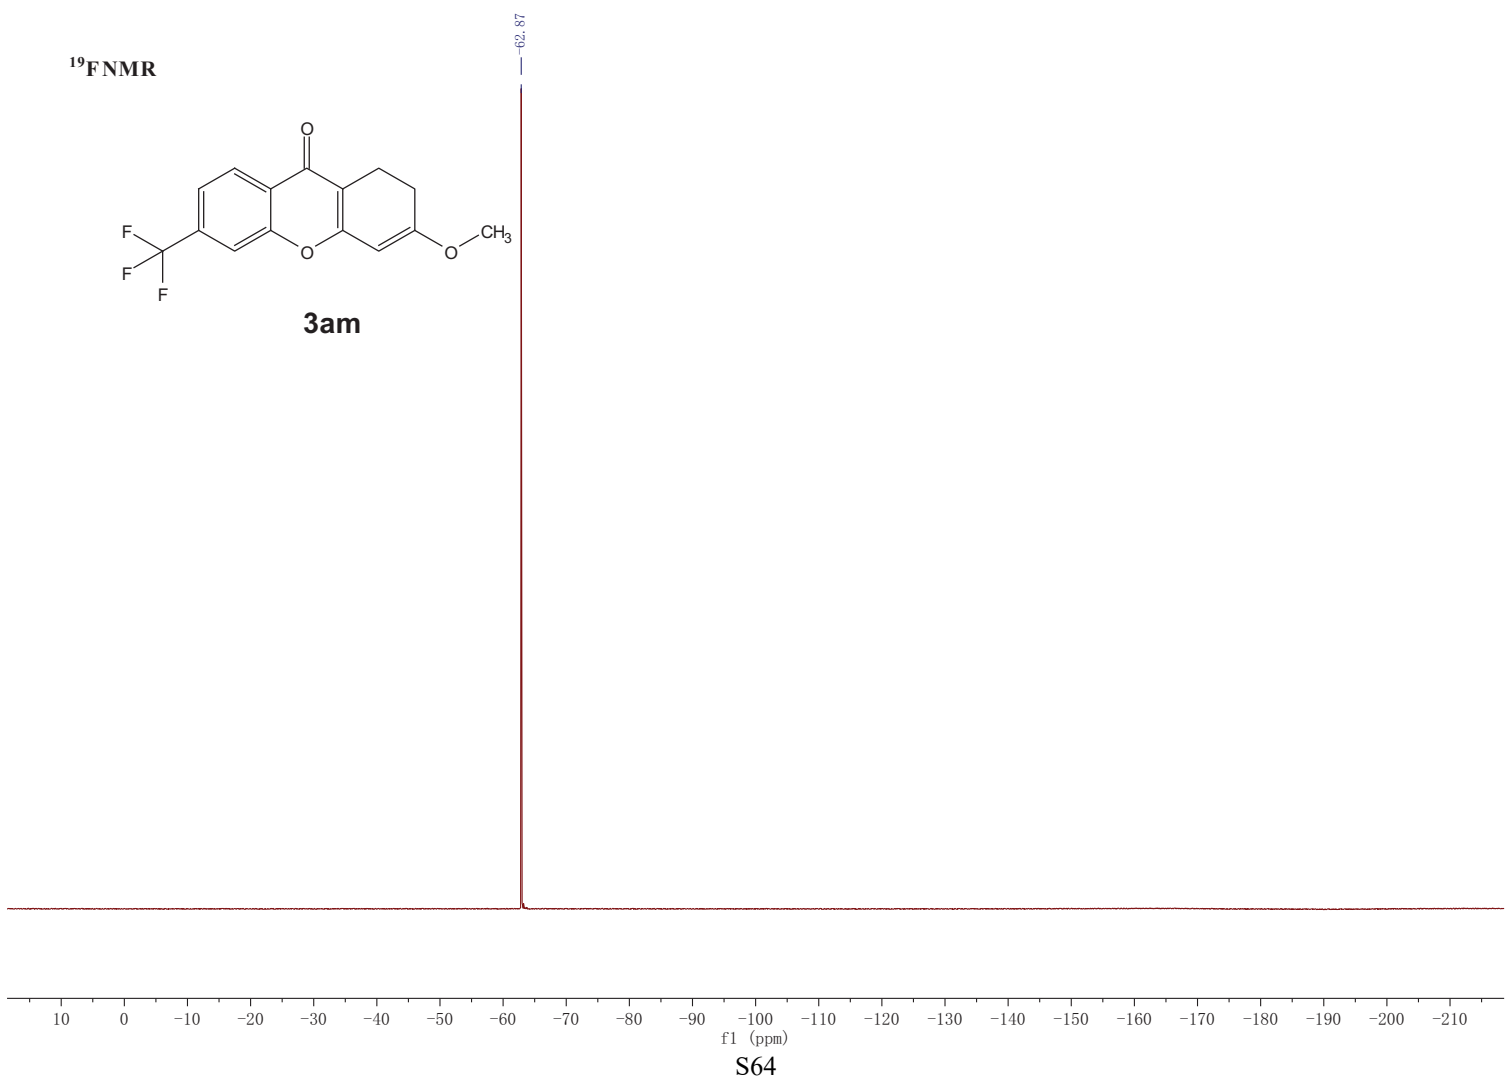



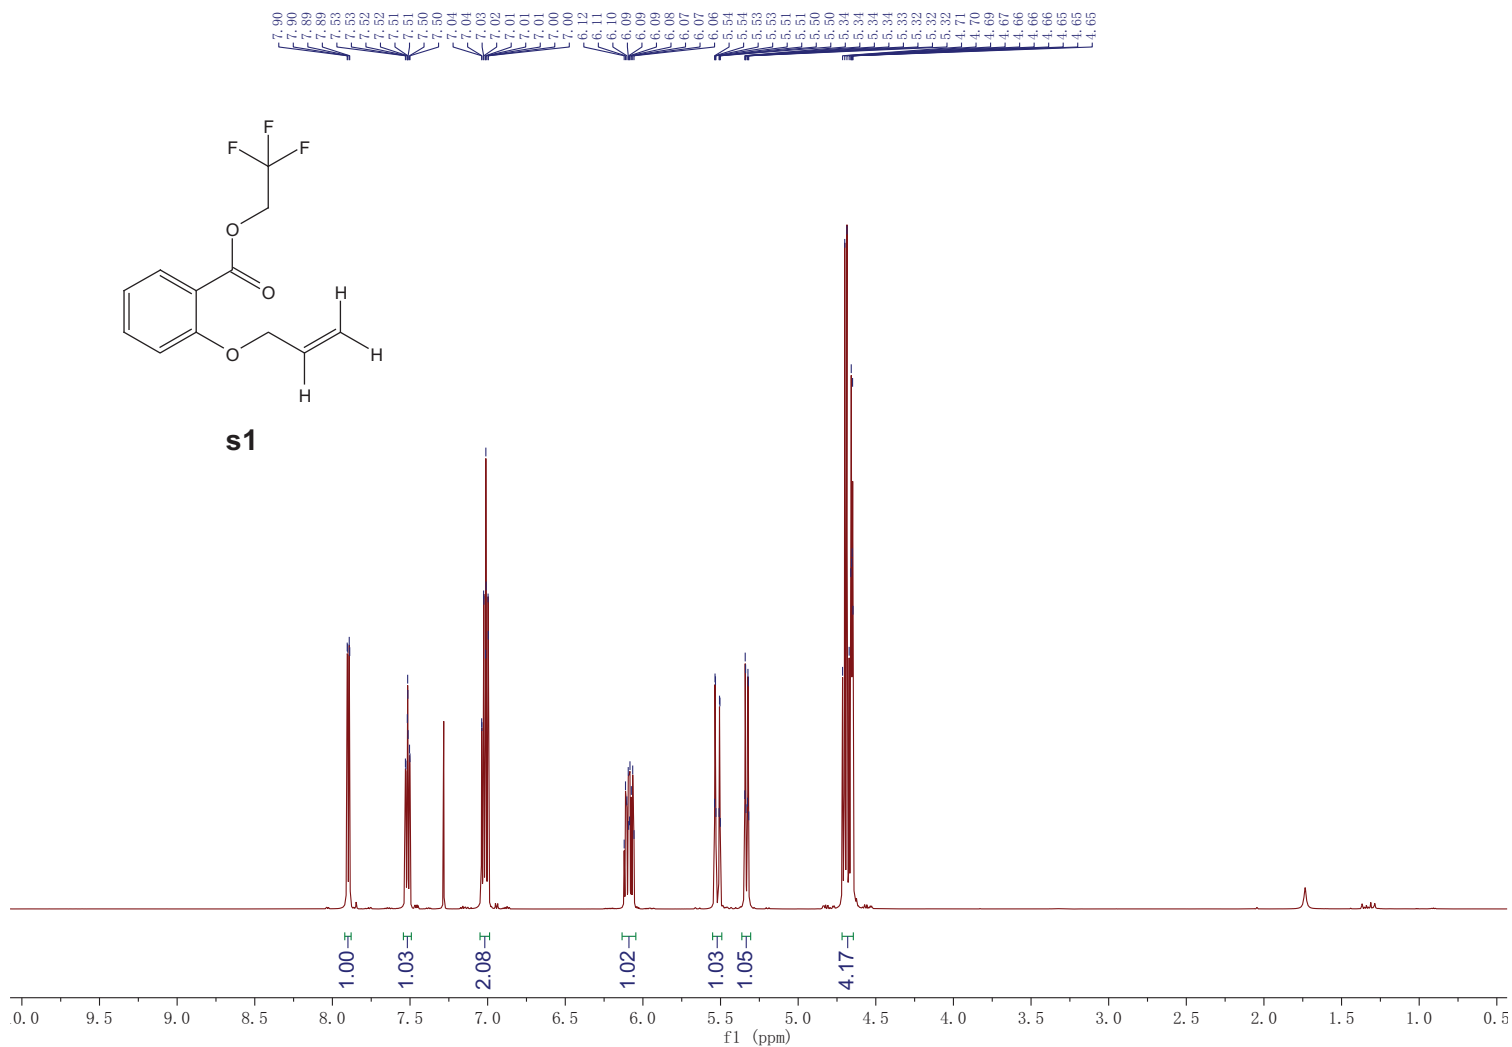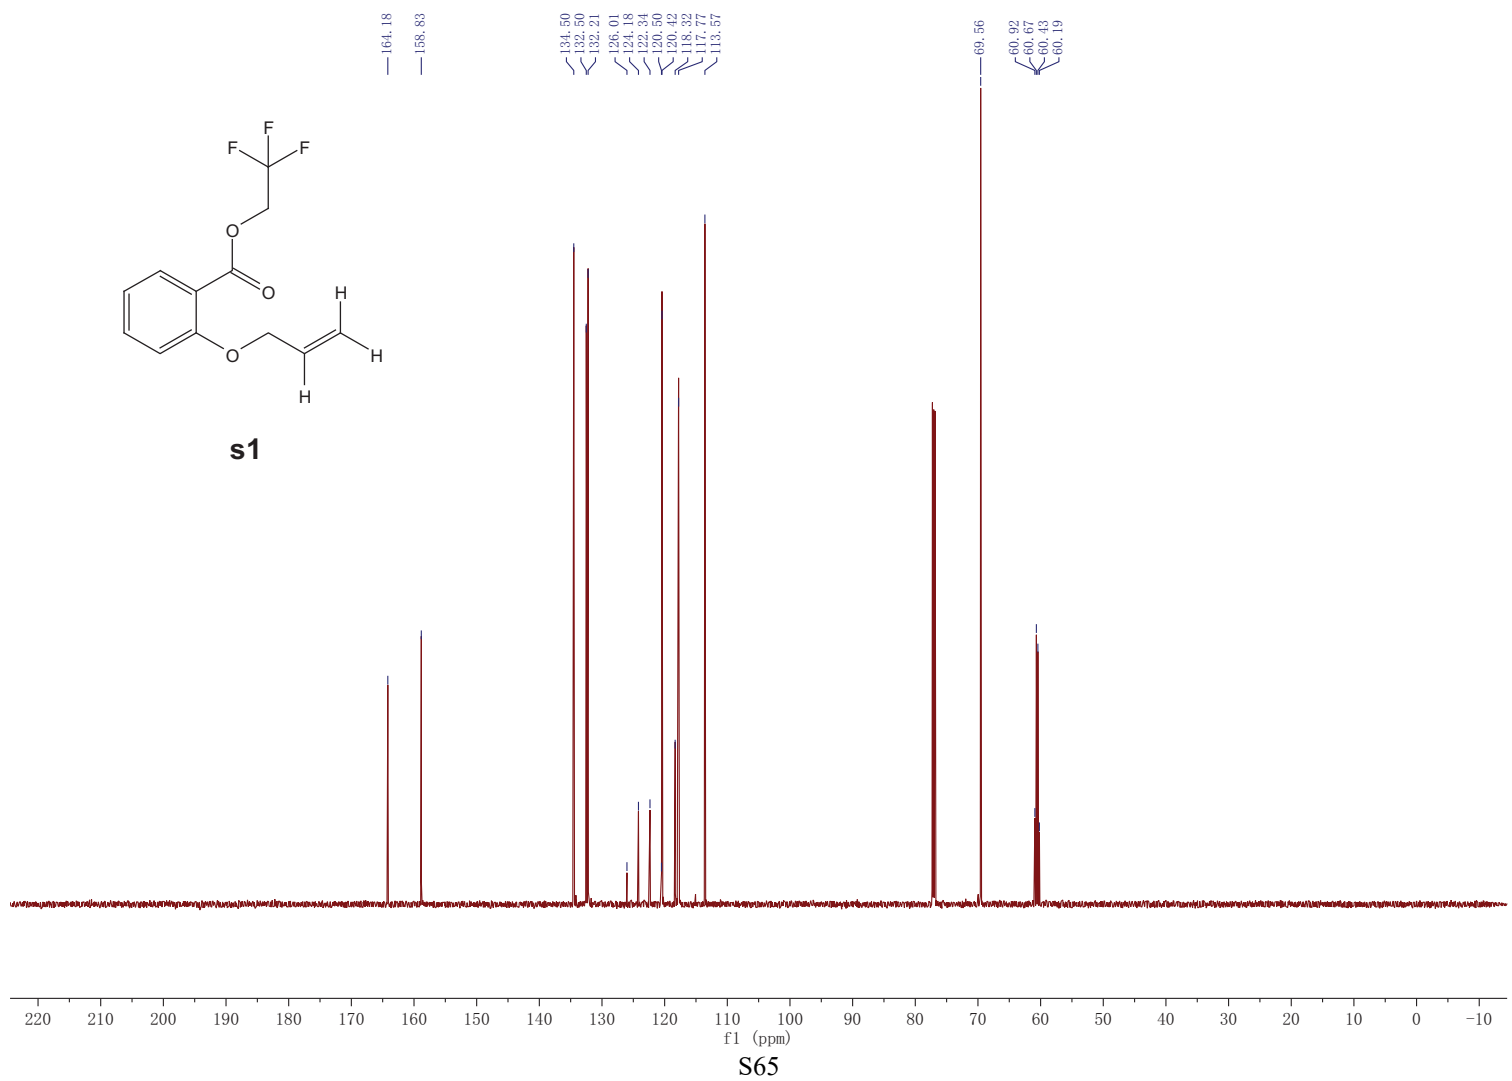

<sup>19</sup>F NMR

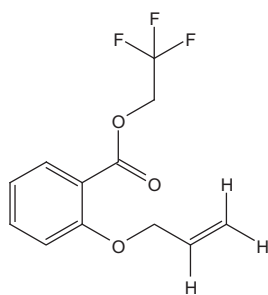

**s1**

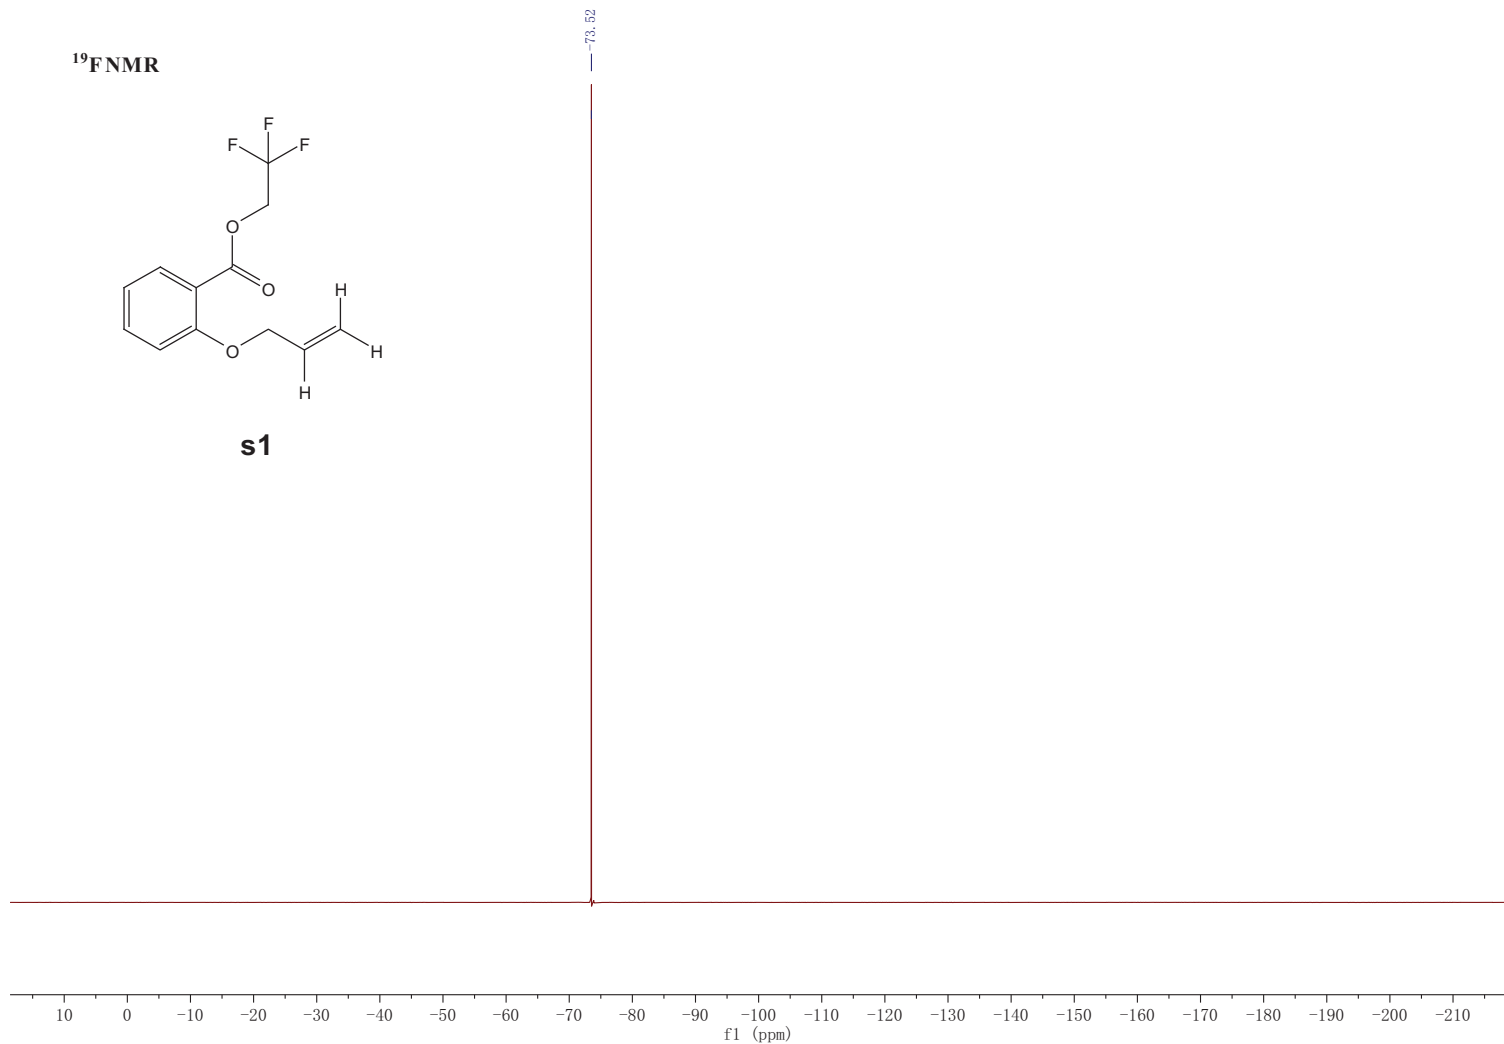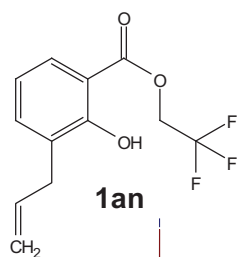

**1an**

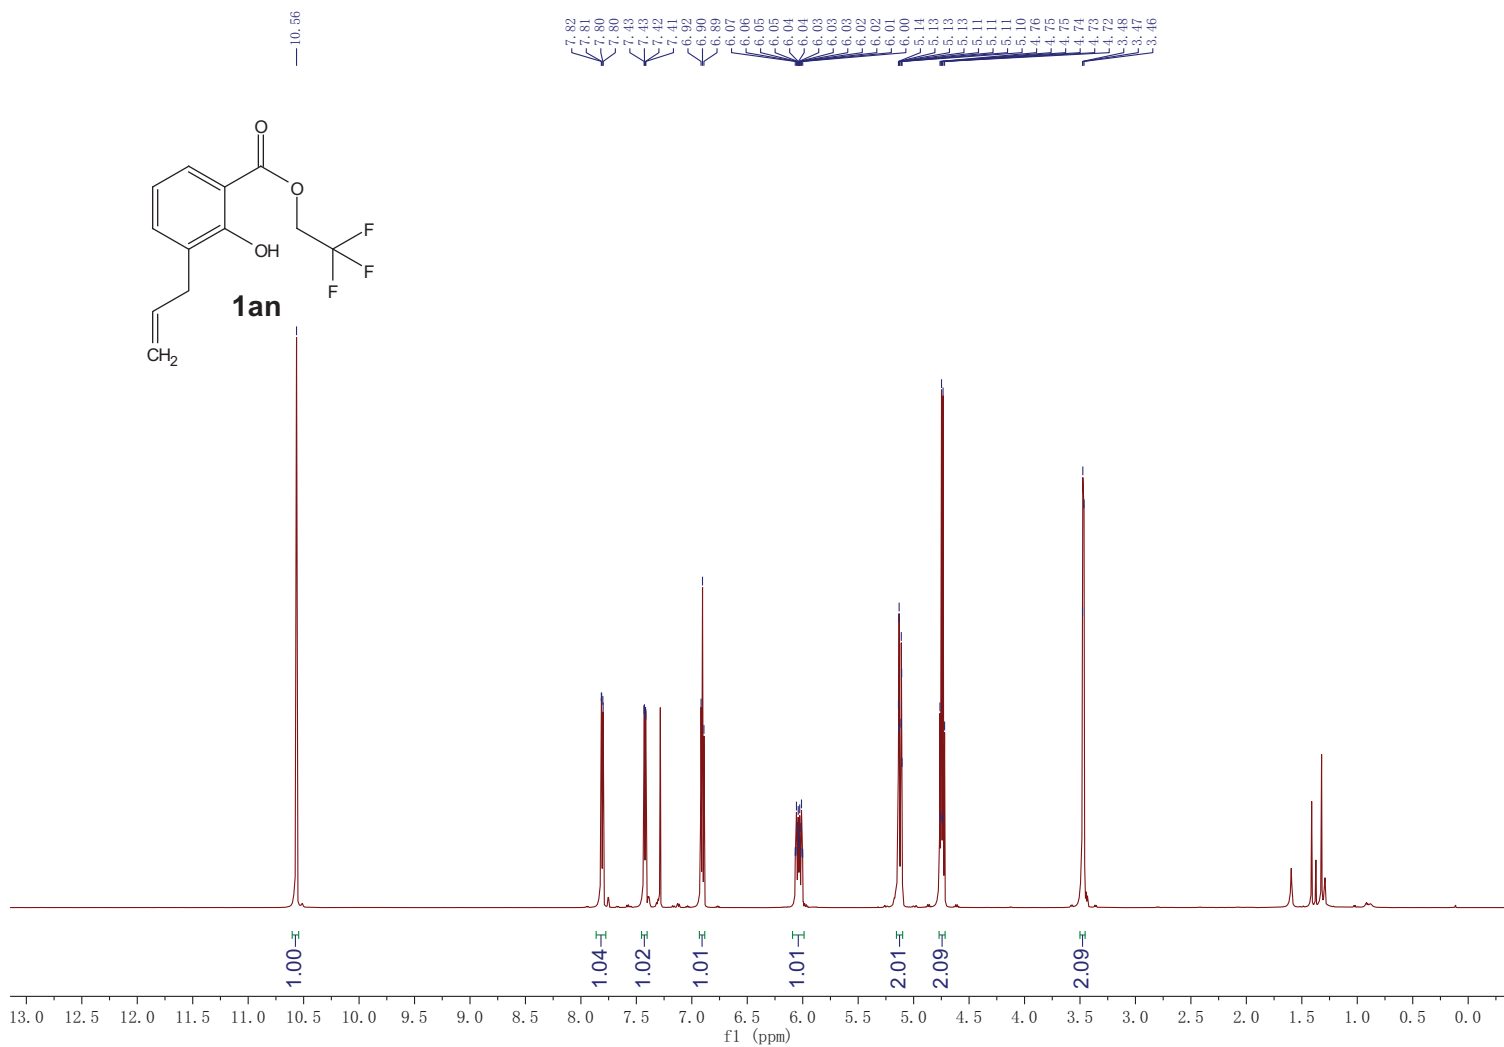

S66

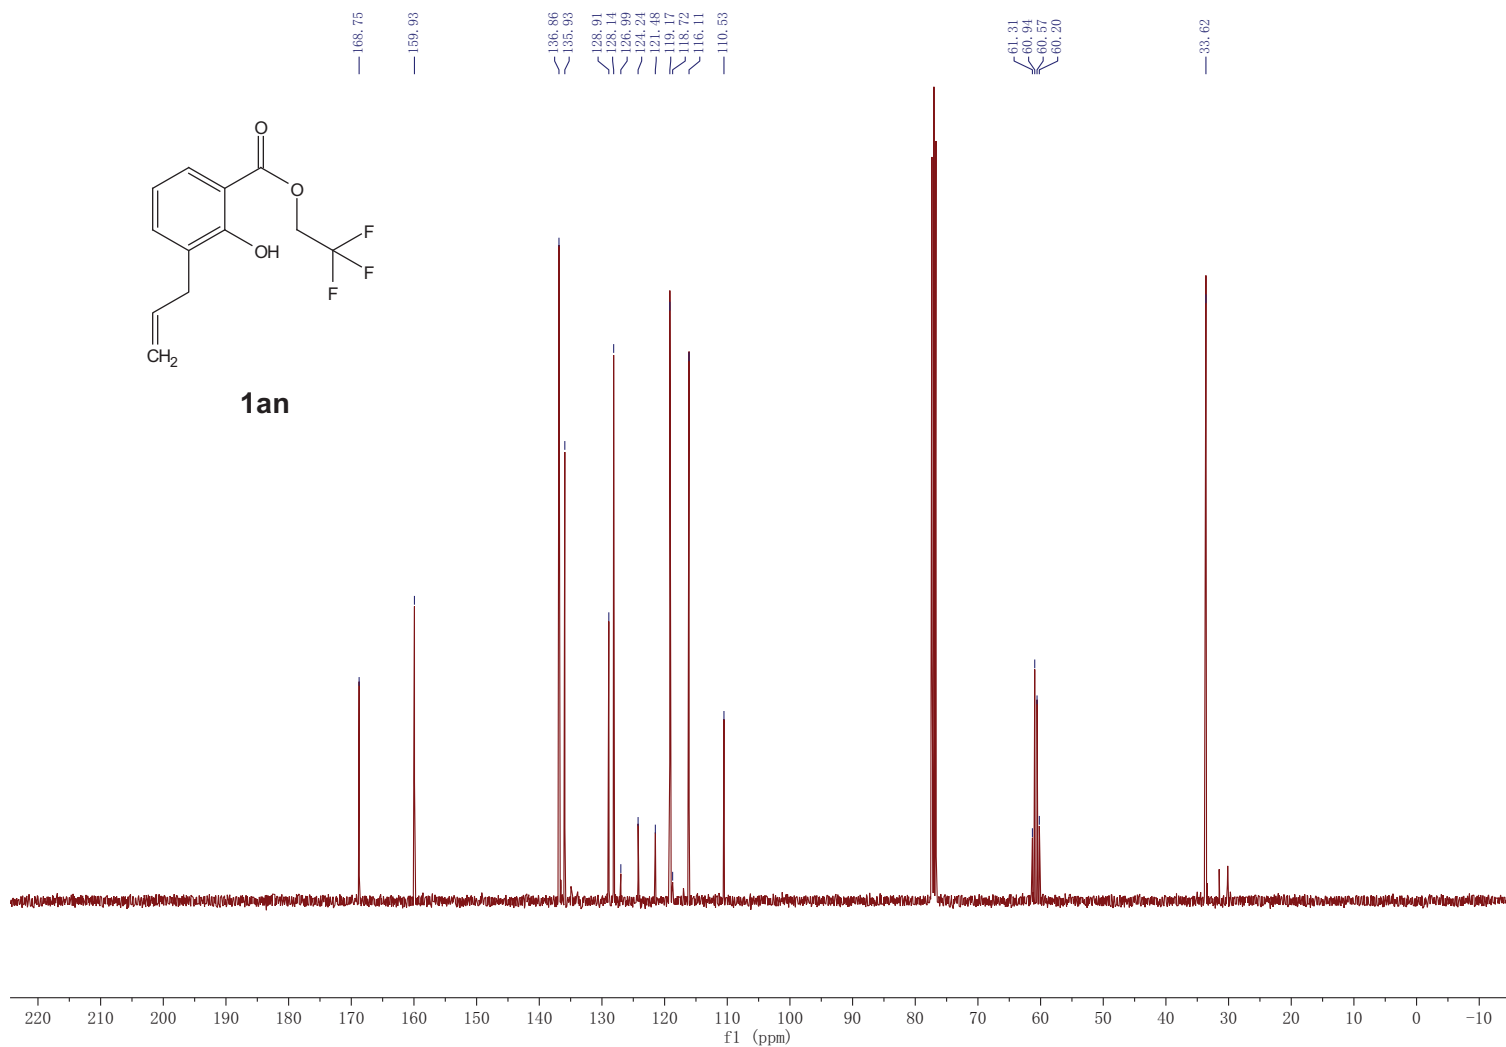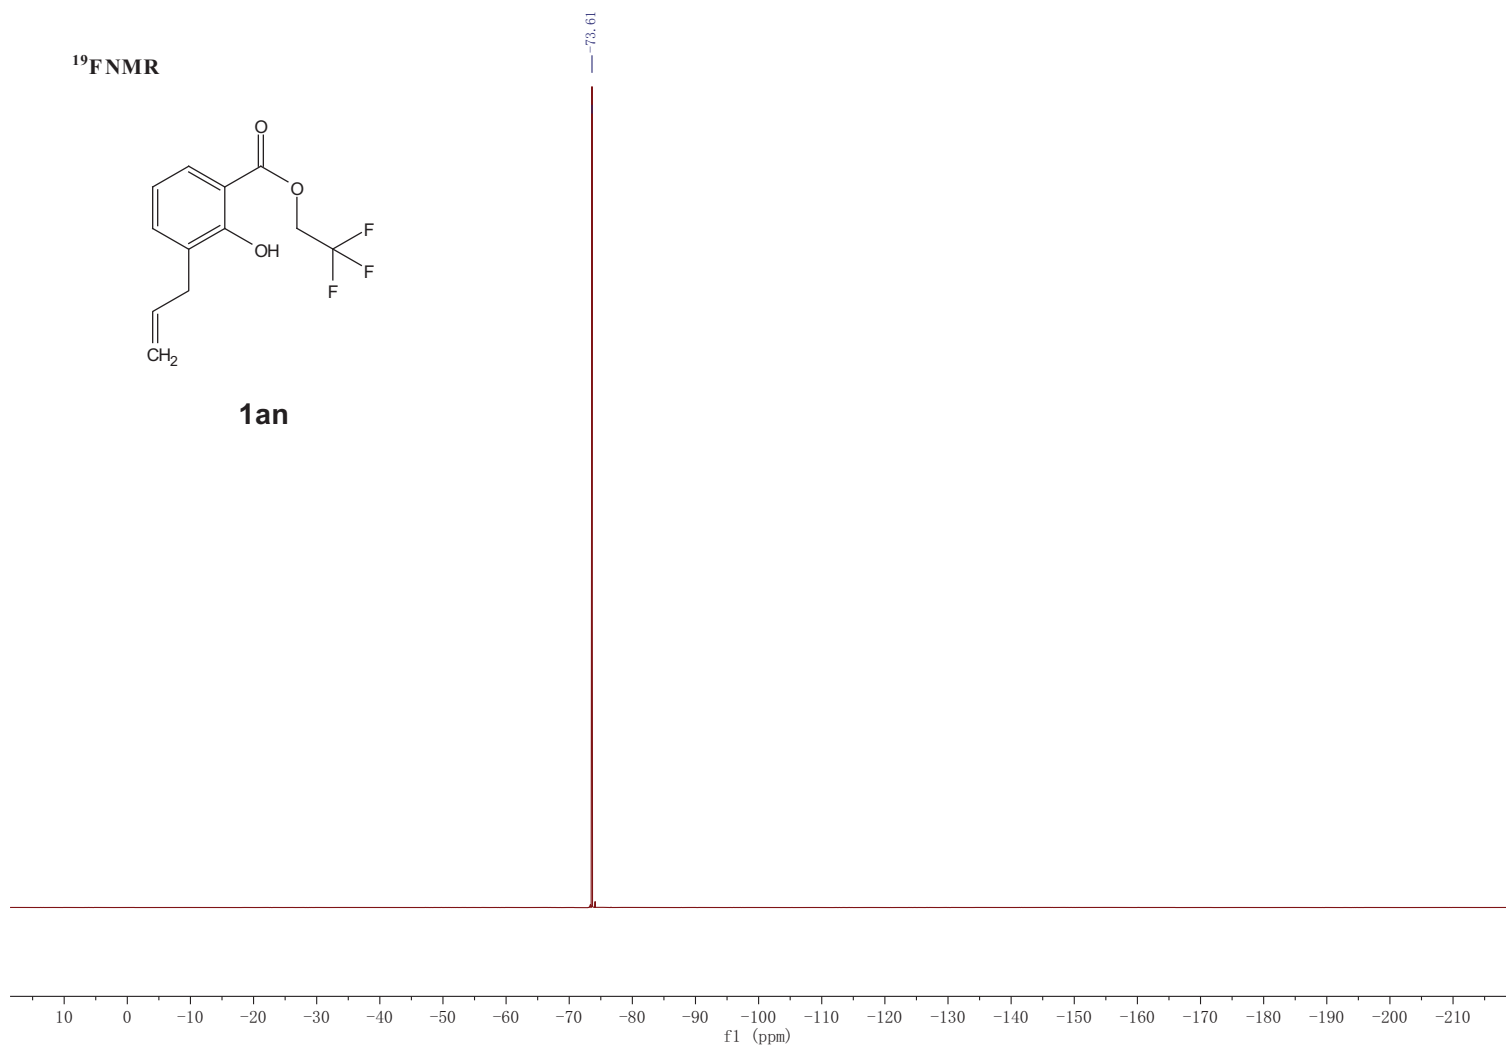

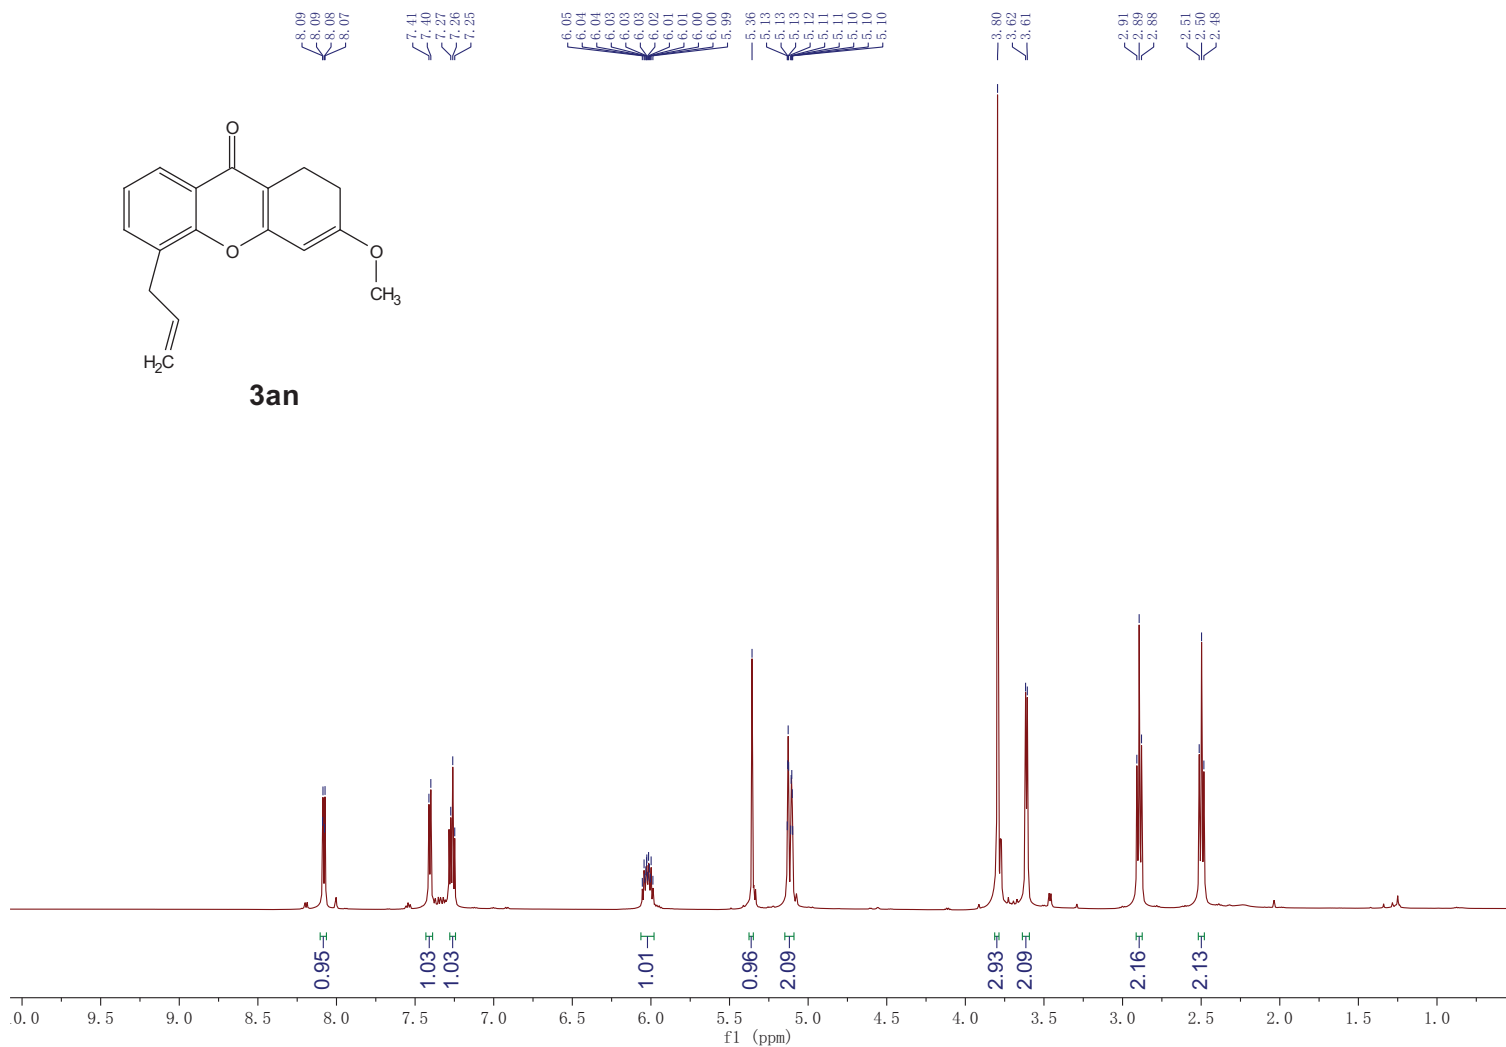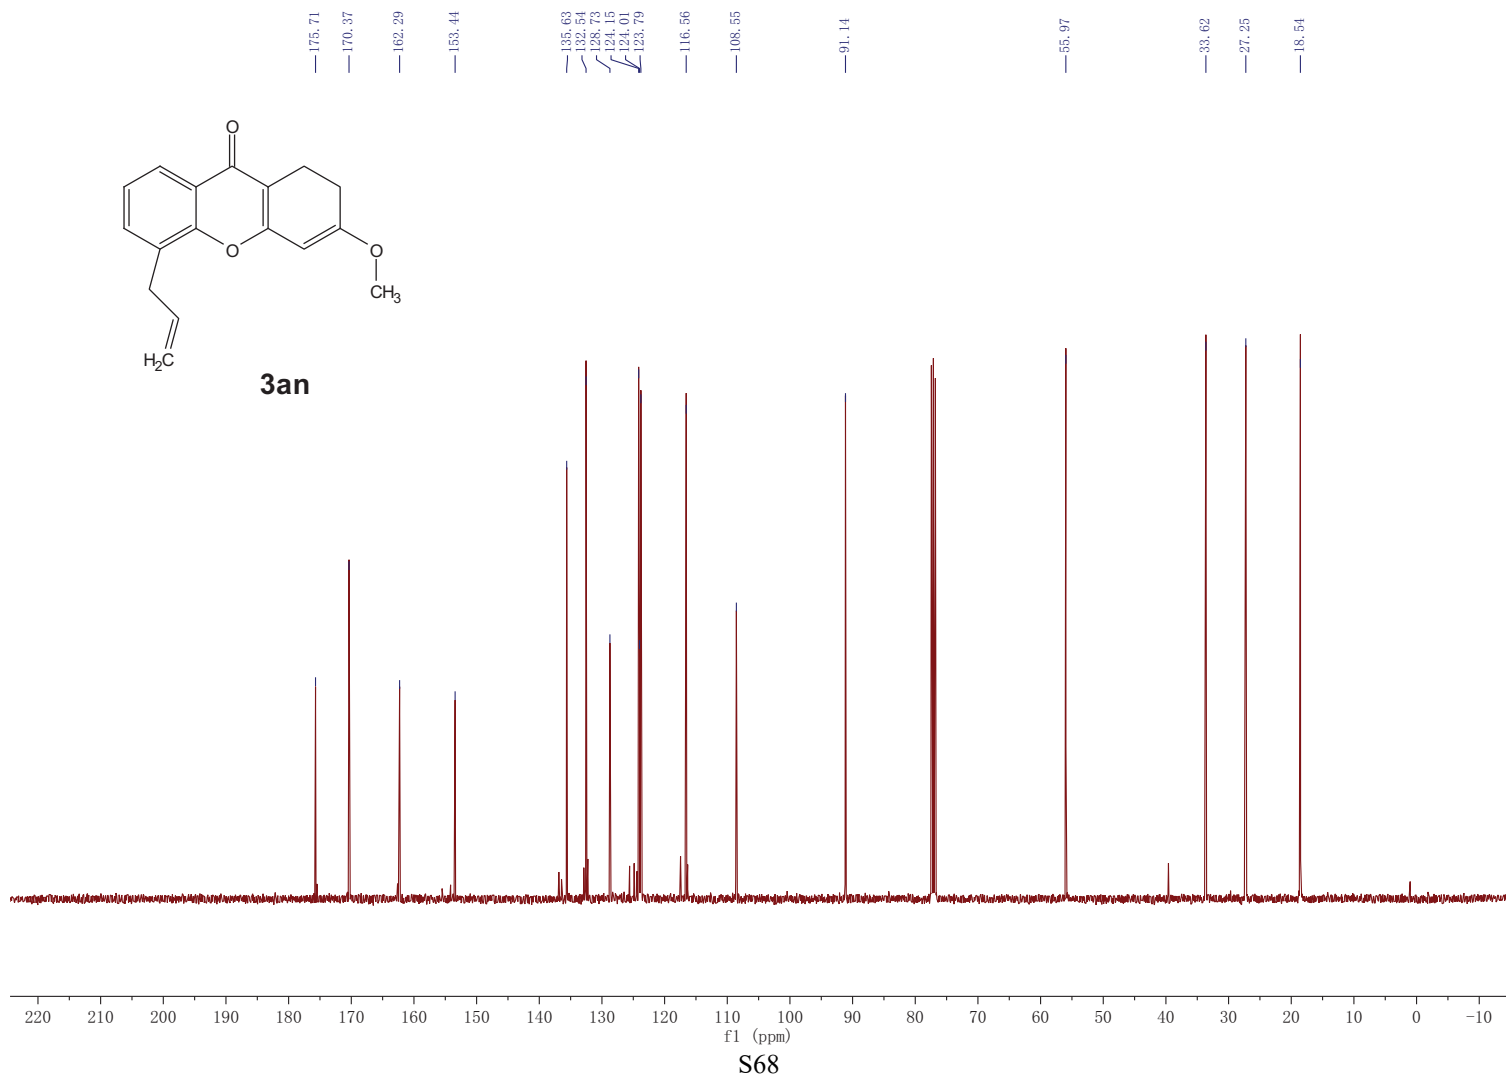

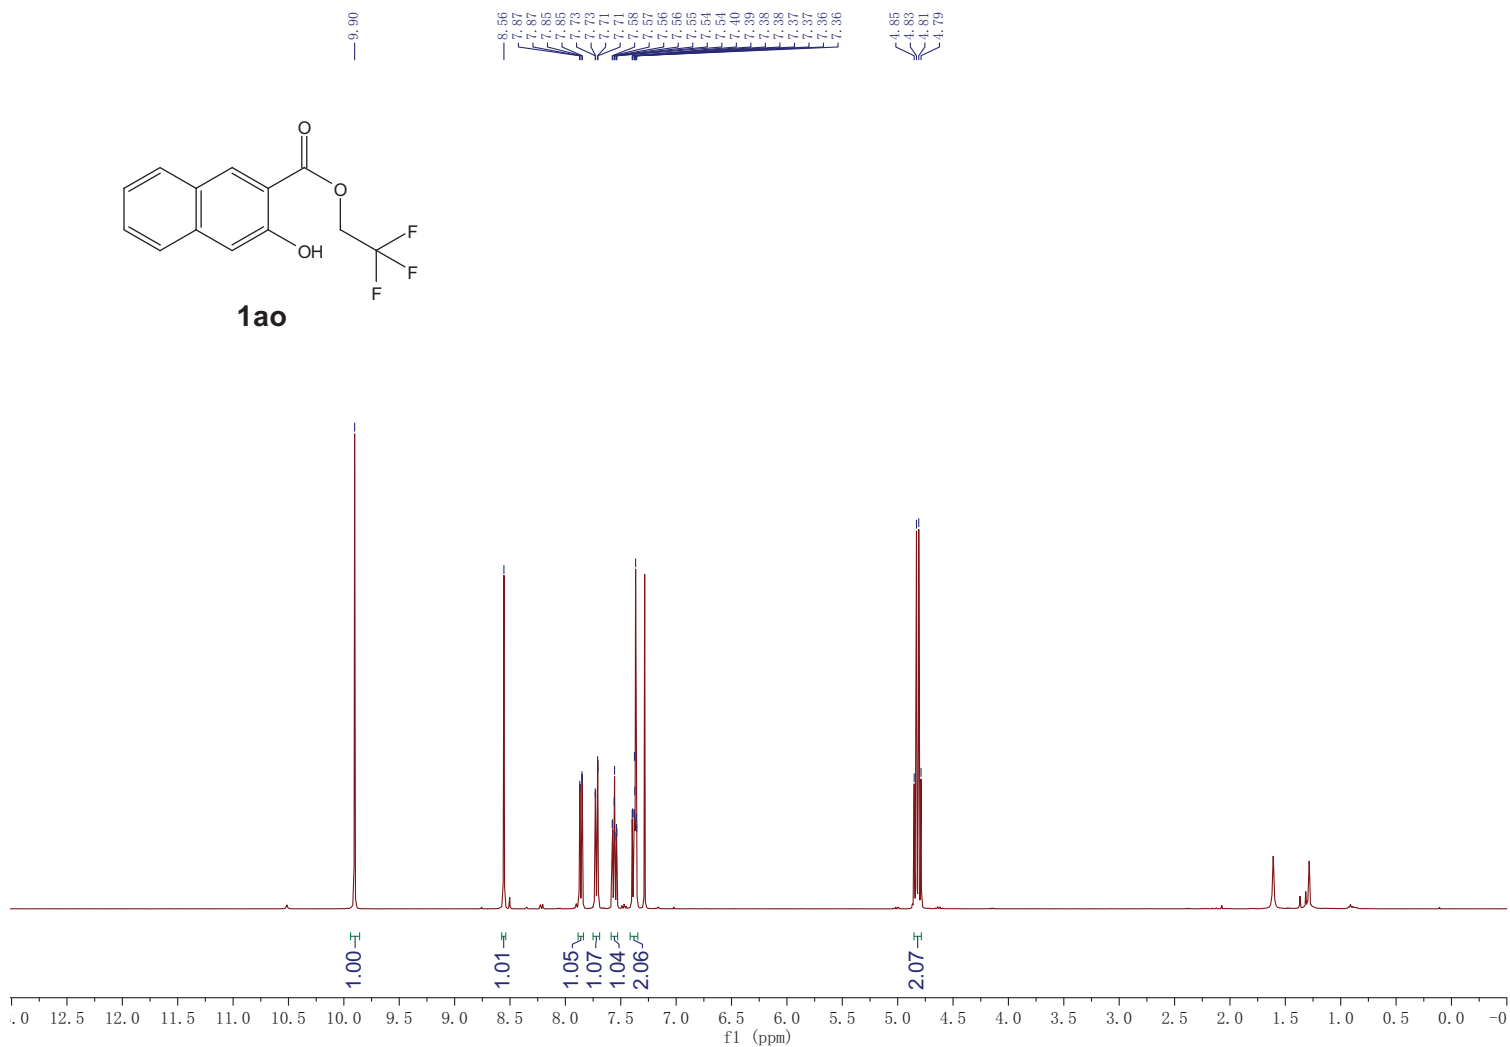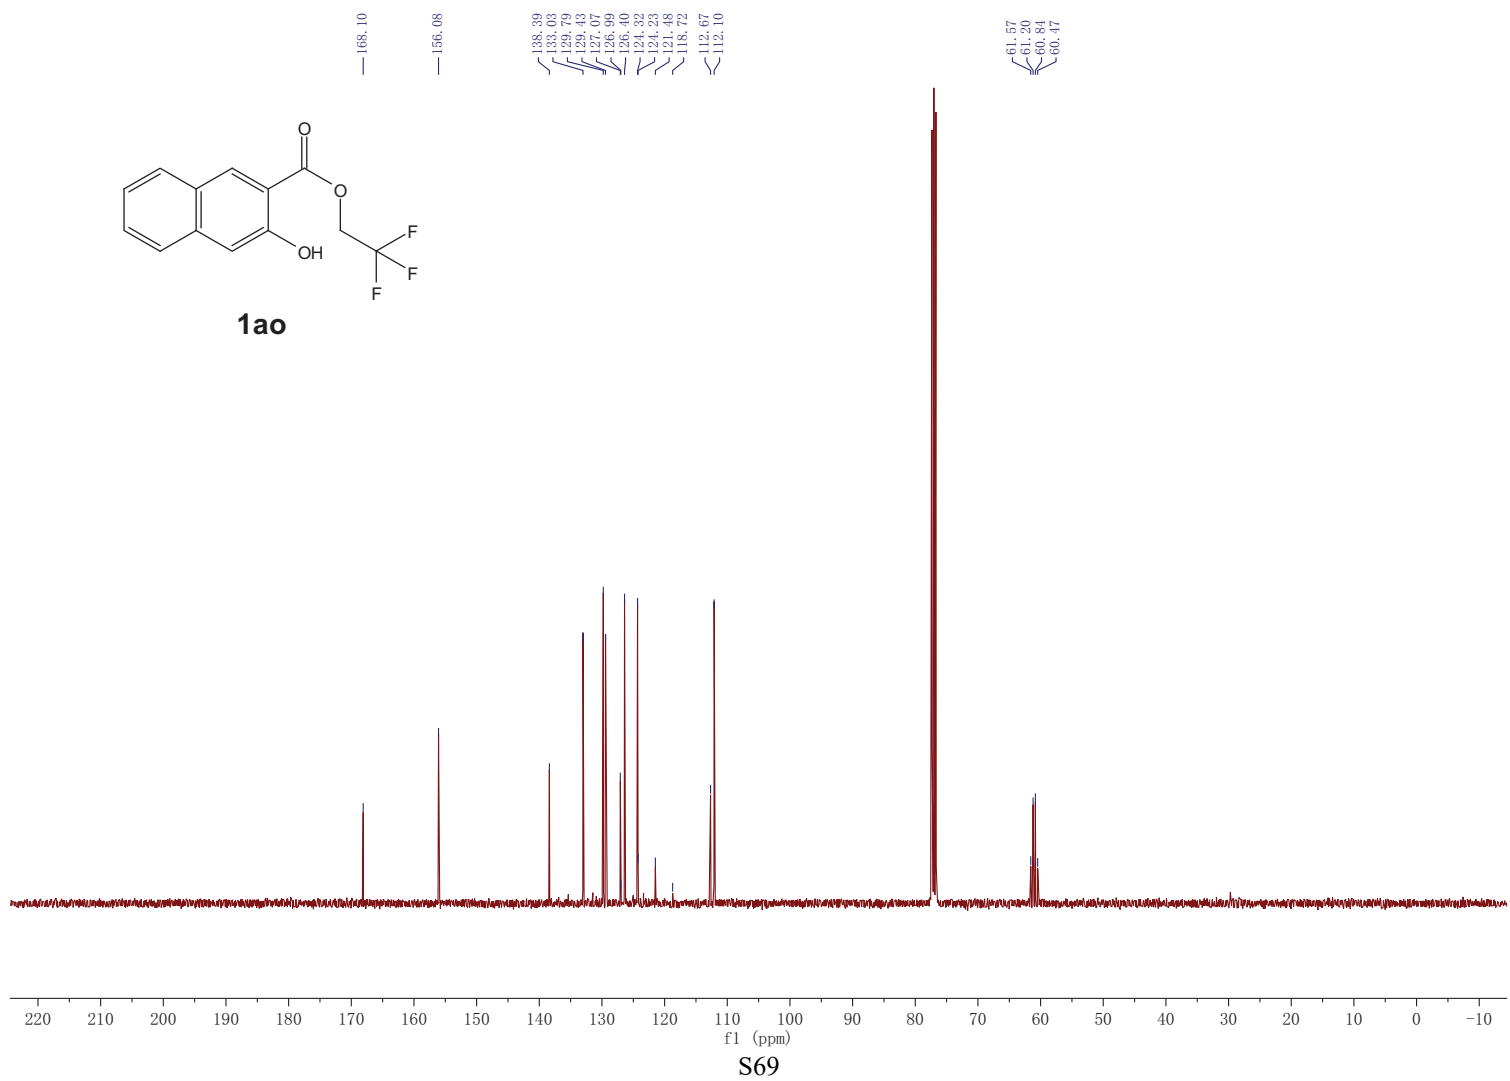

<sup>19</sup>F NMR

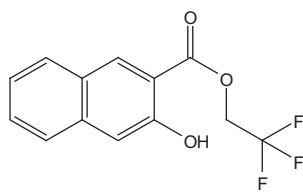

**1ao**

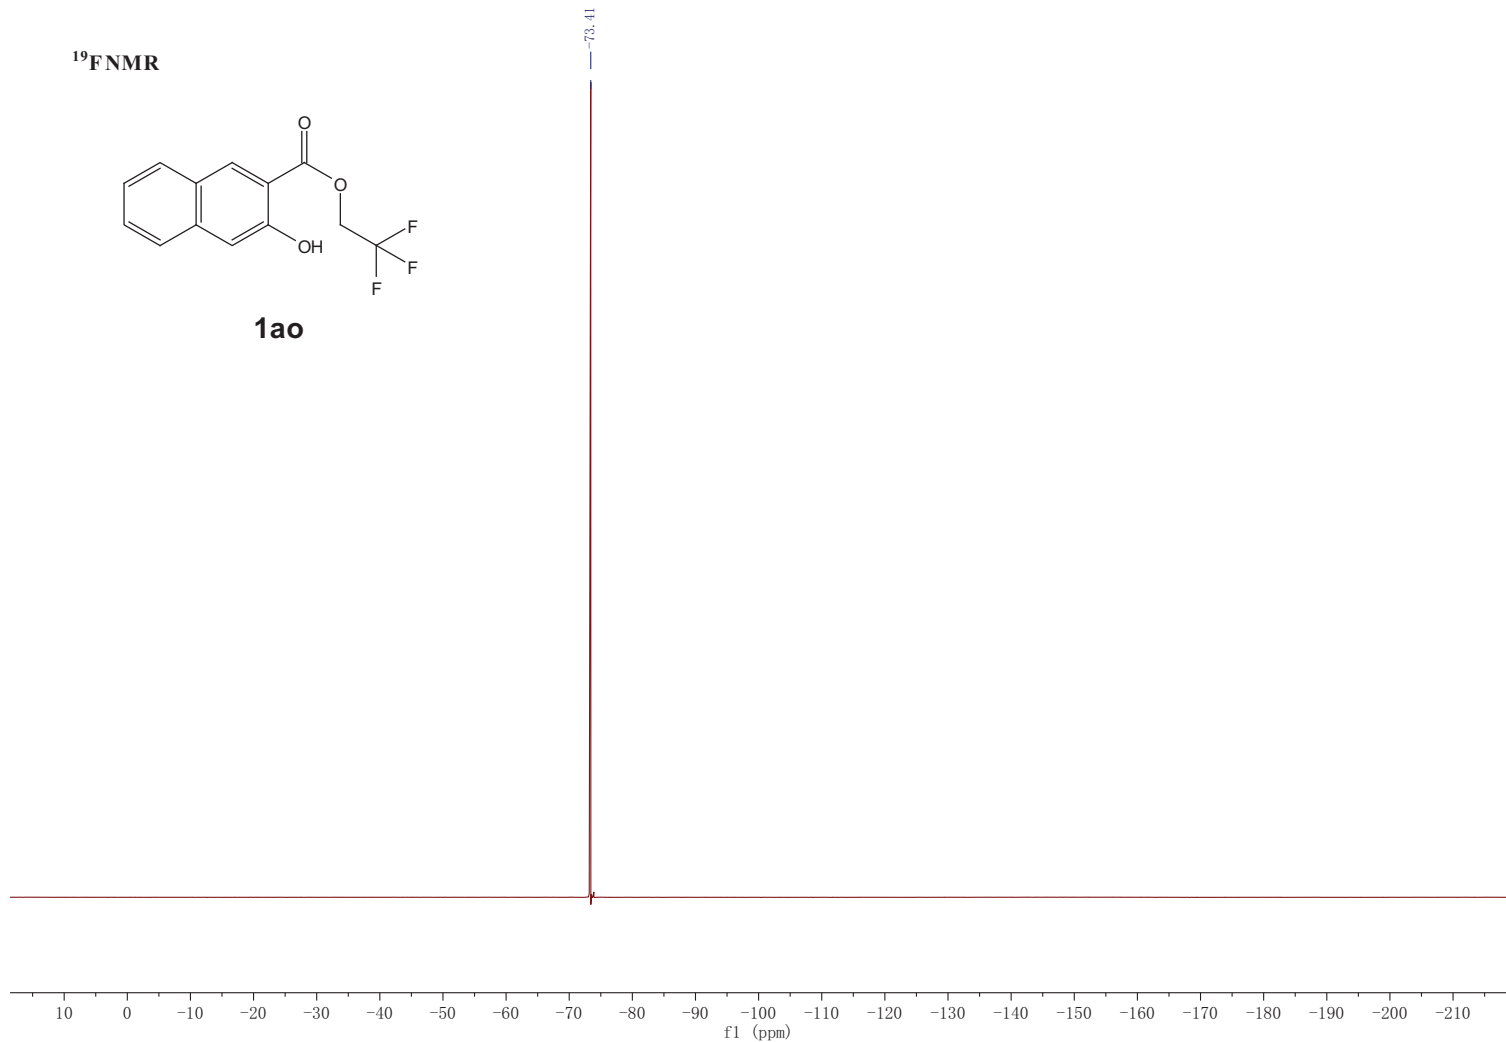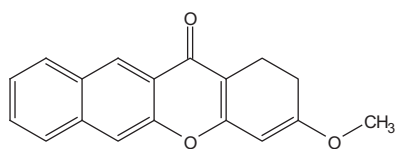

**3ao**

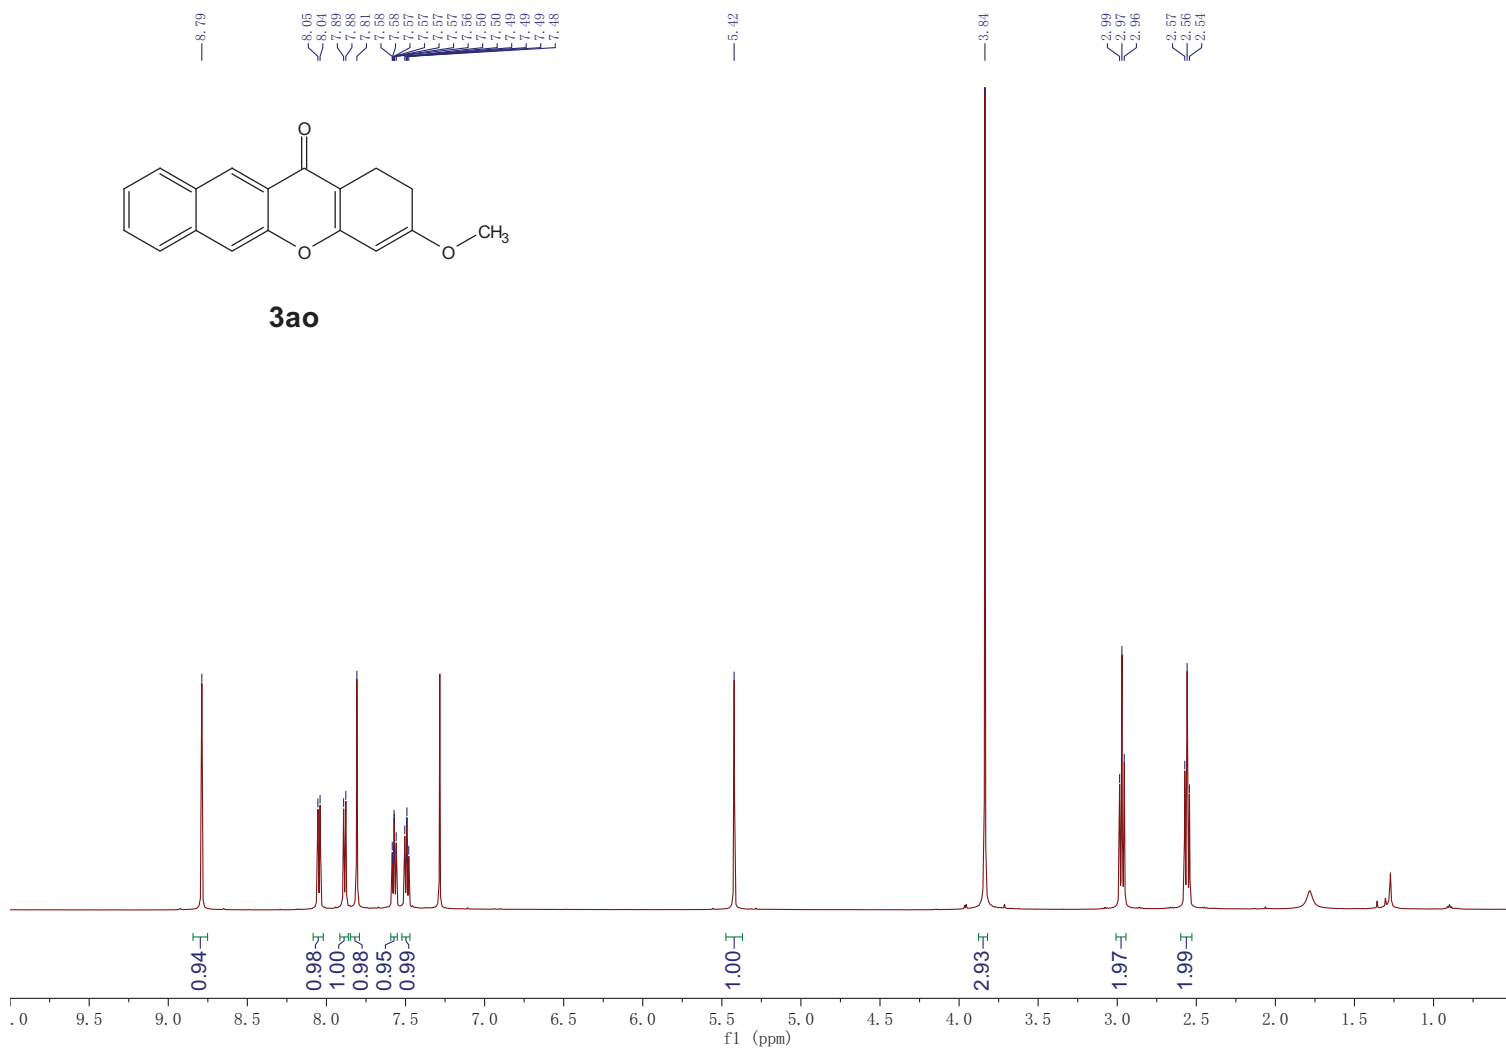

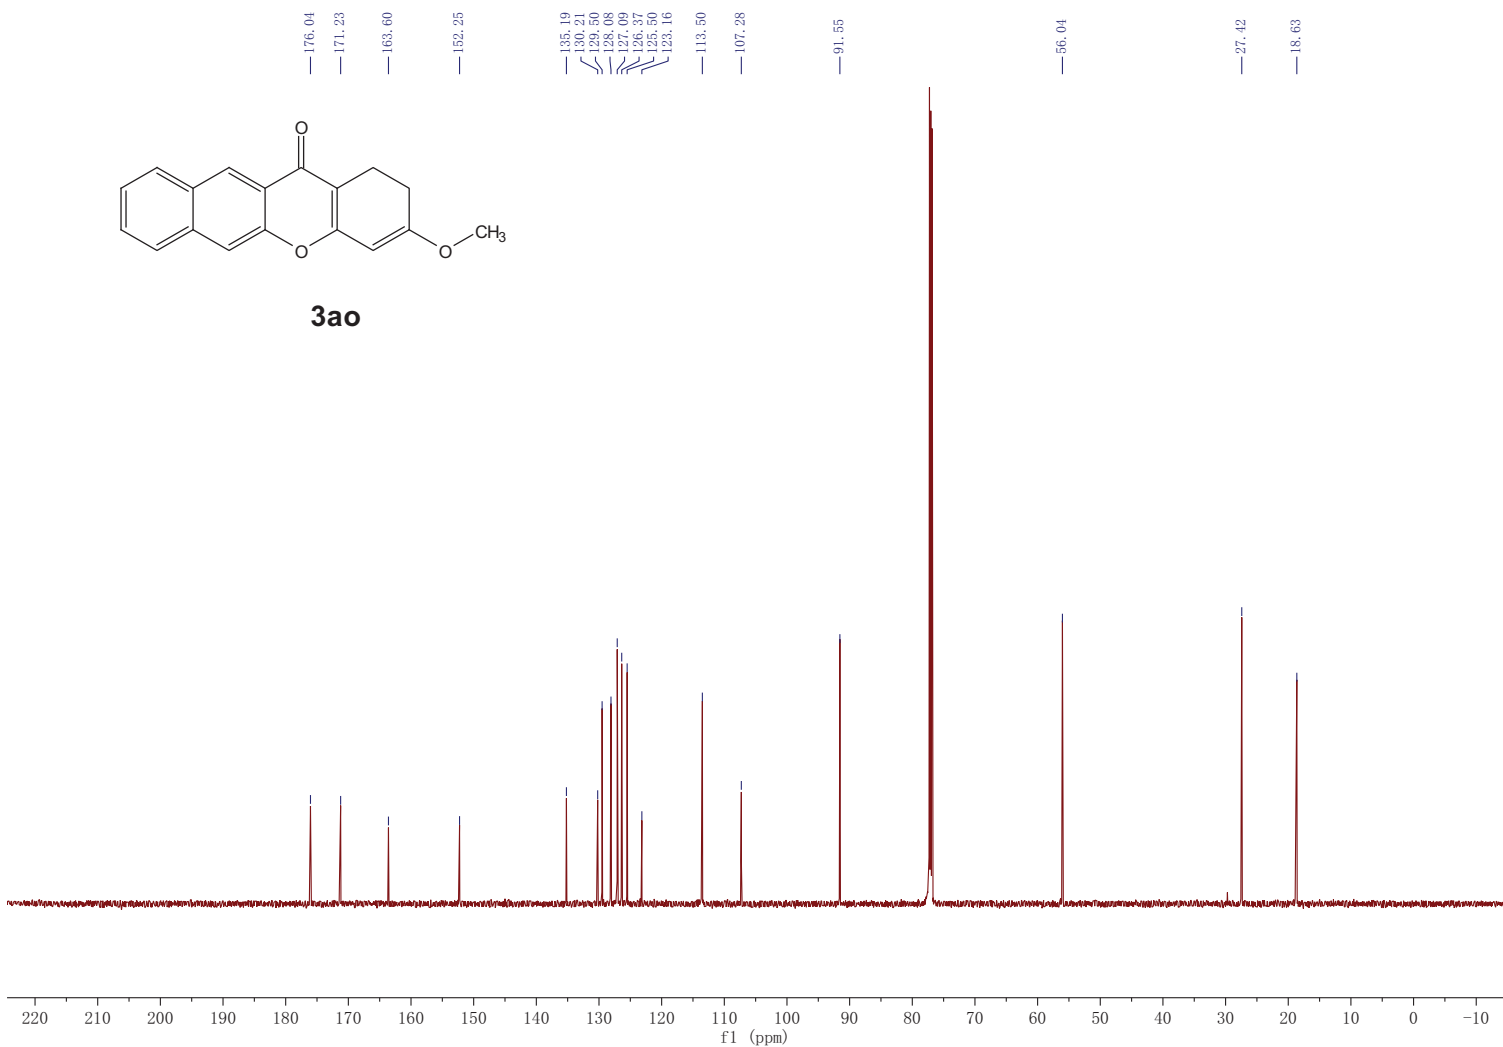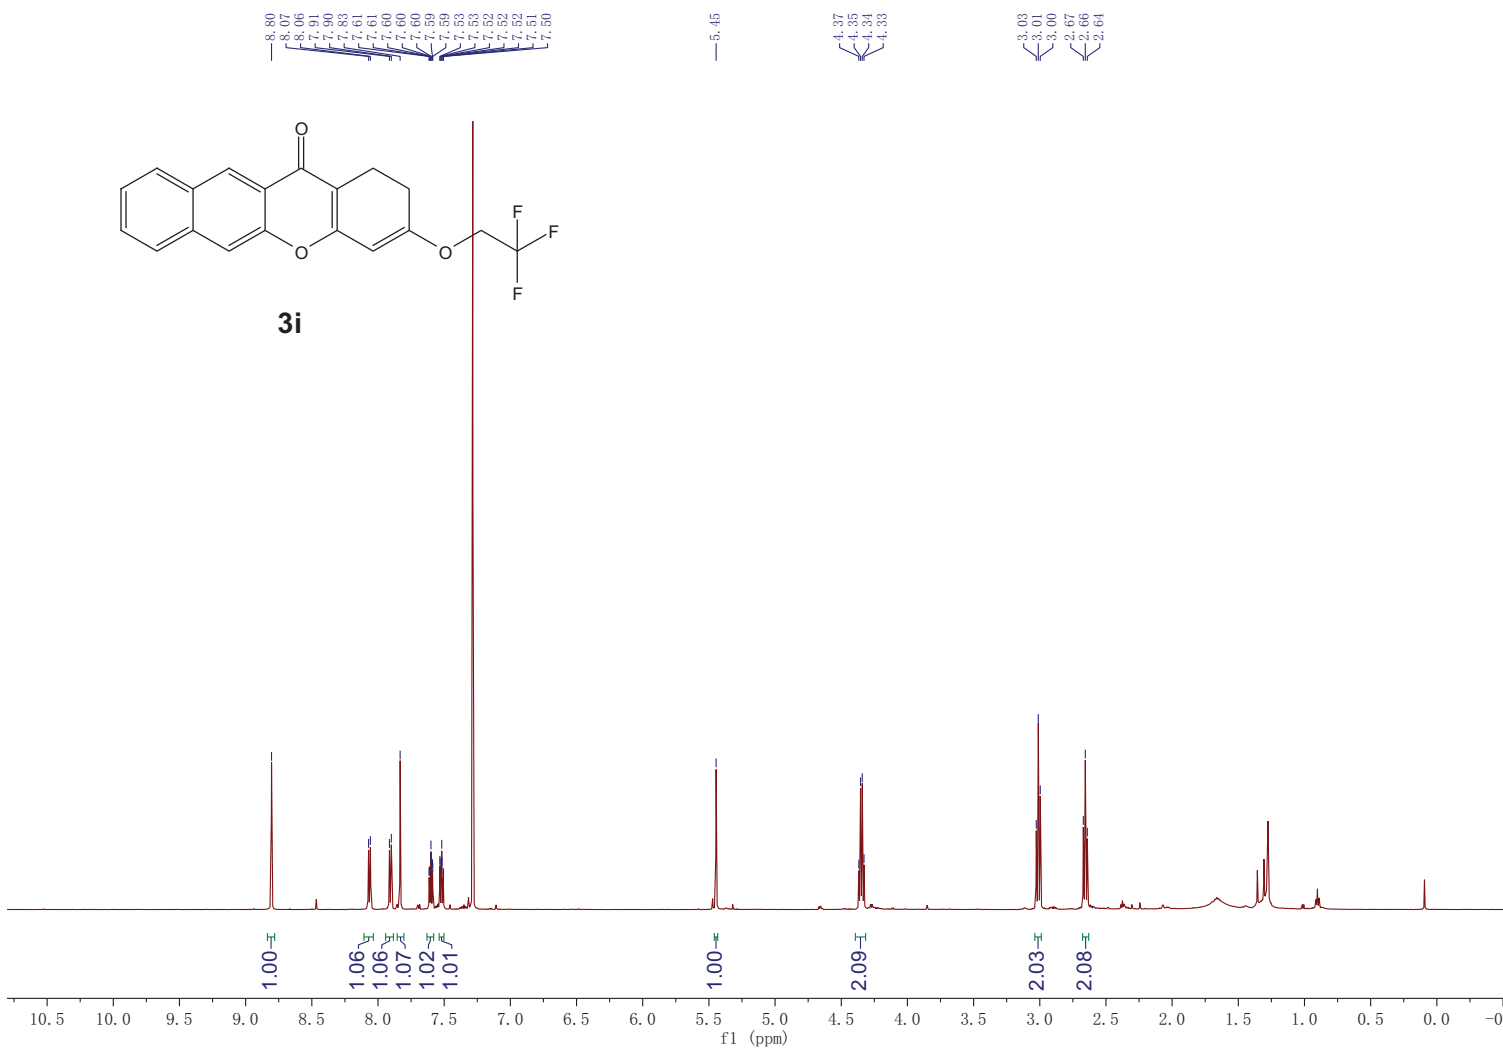

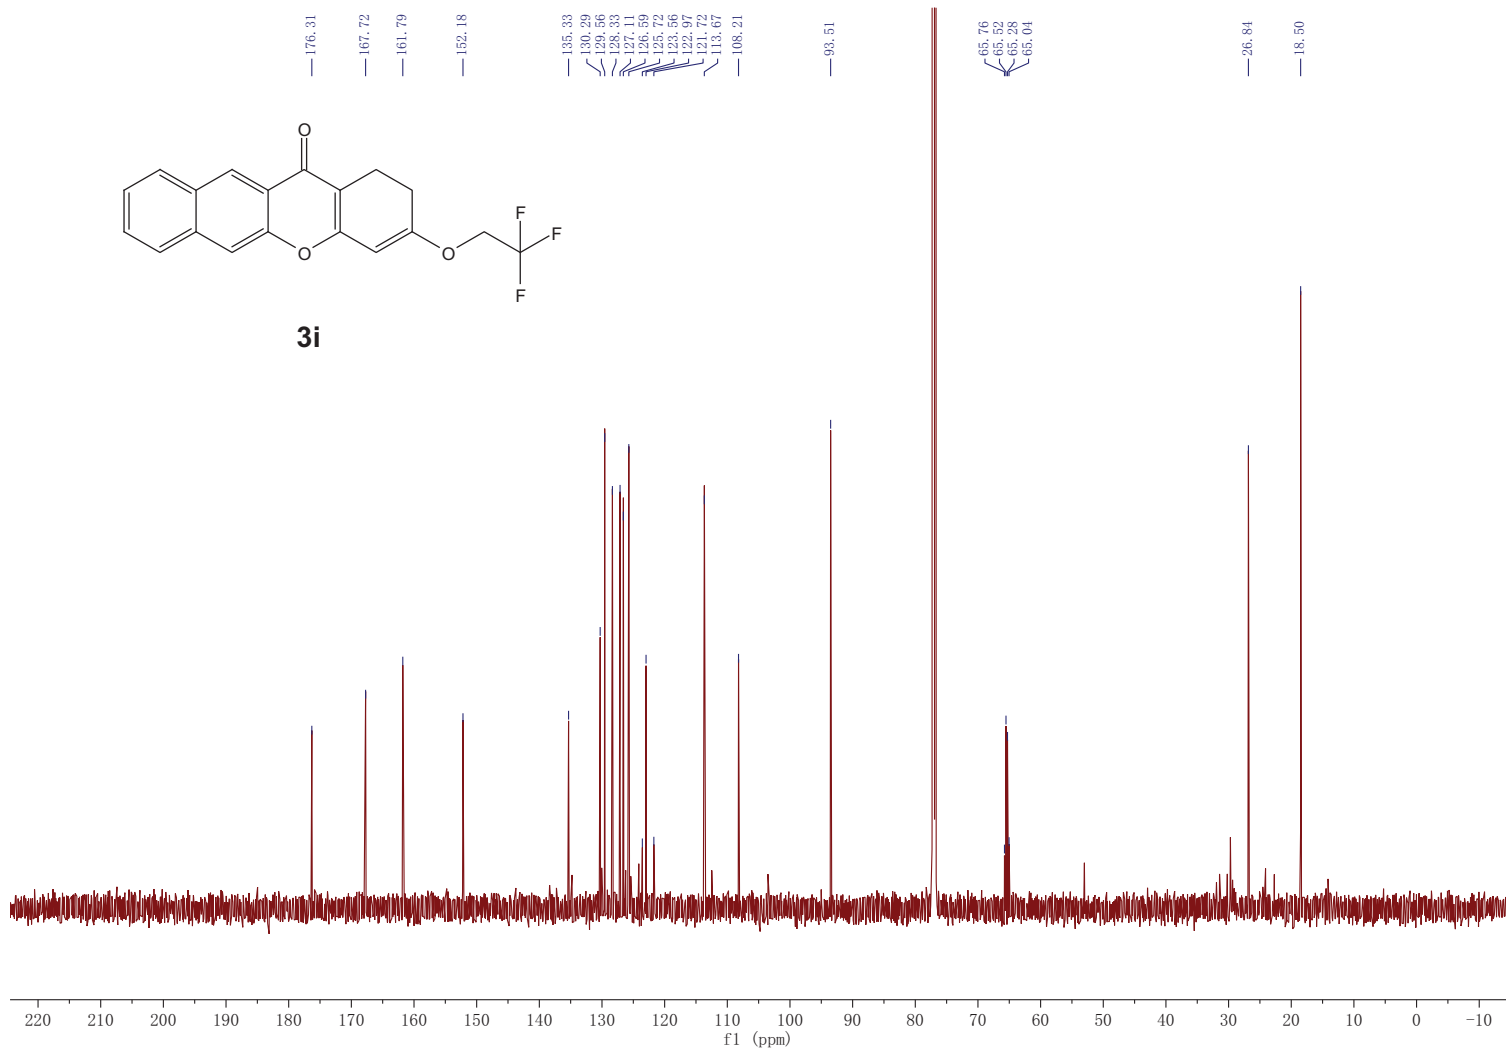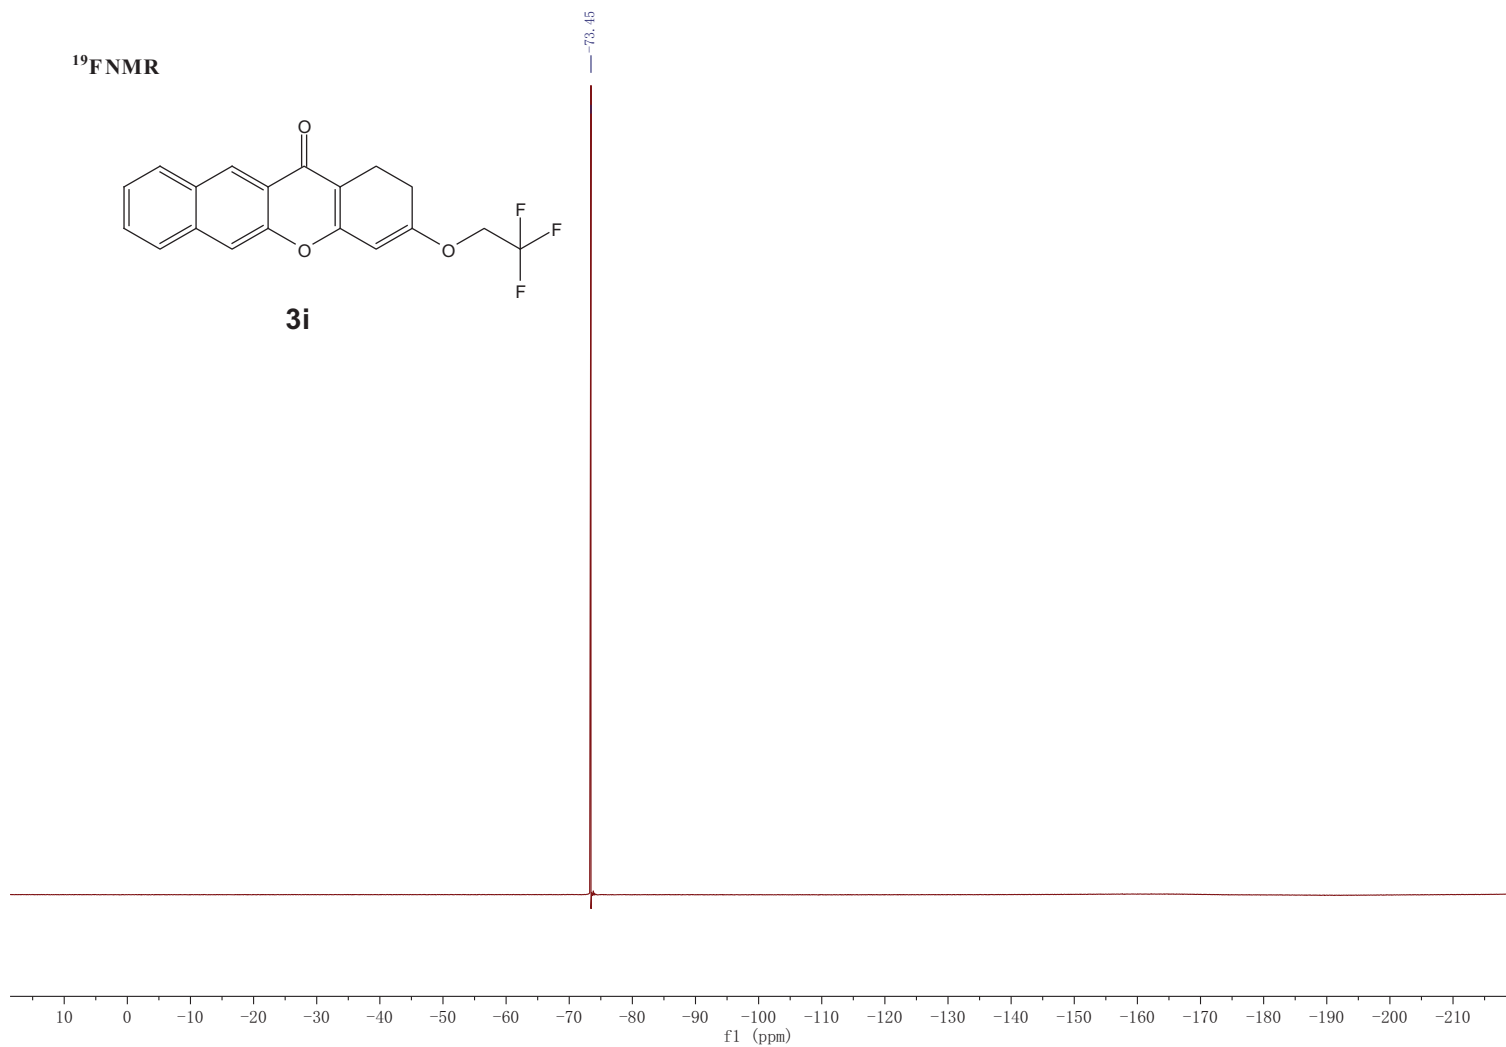



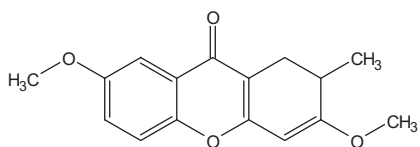

3j

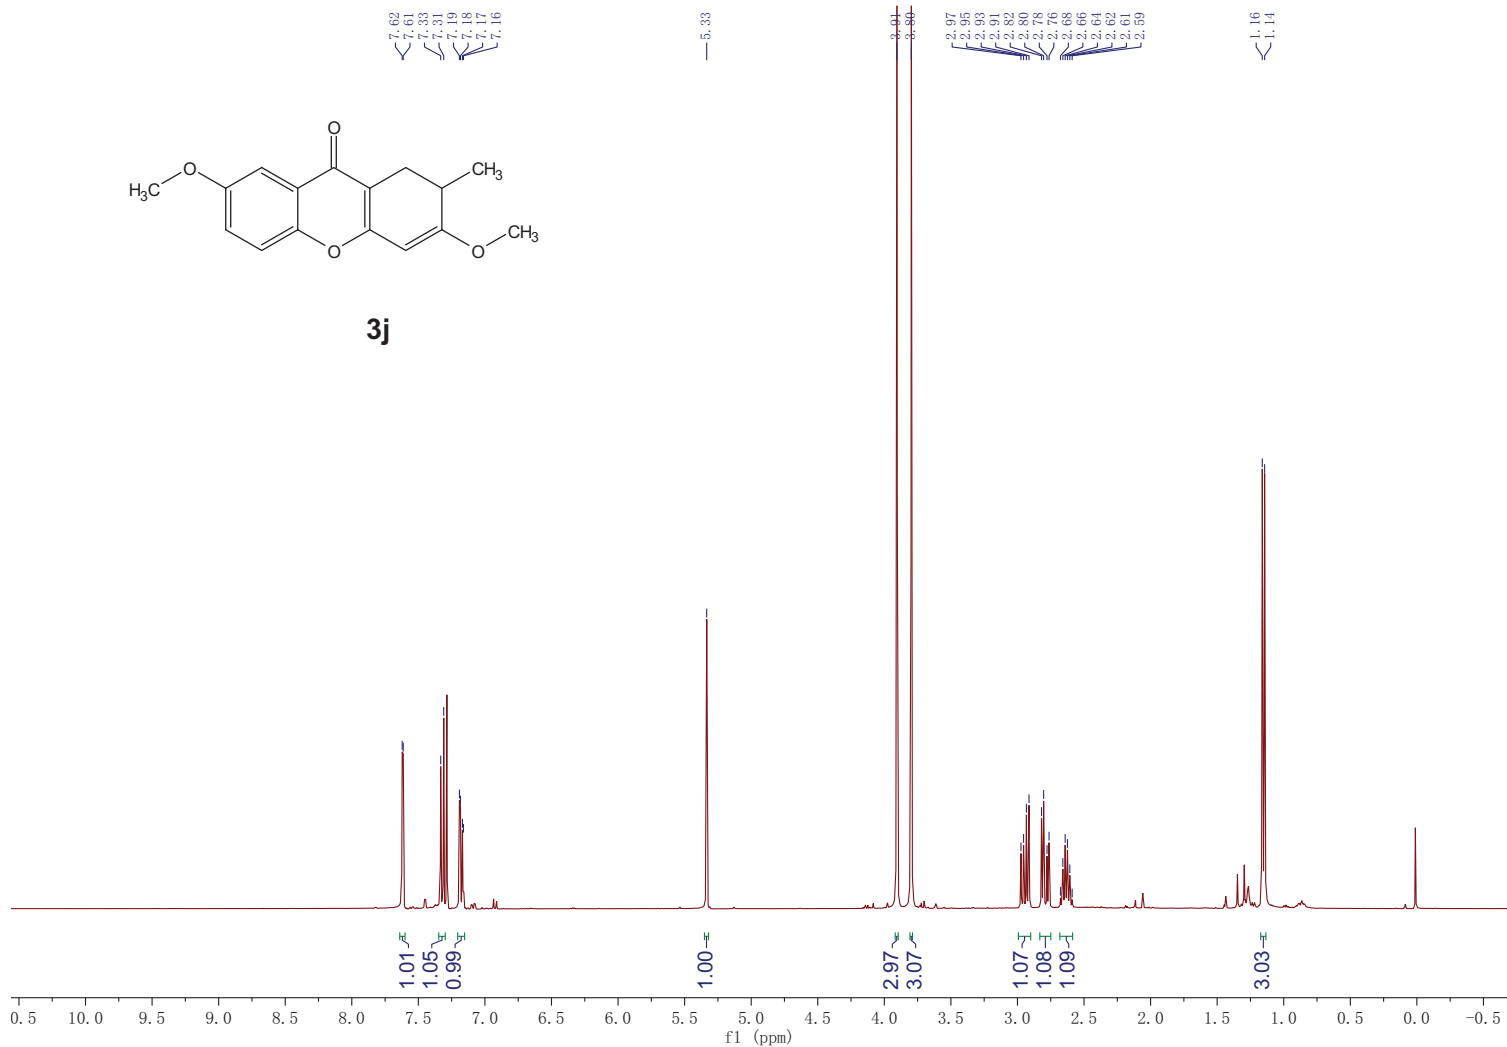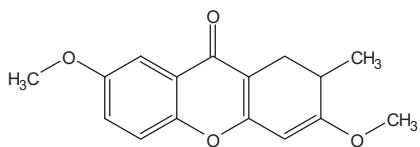

3j

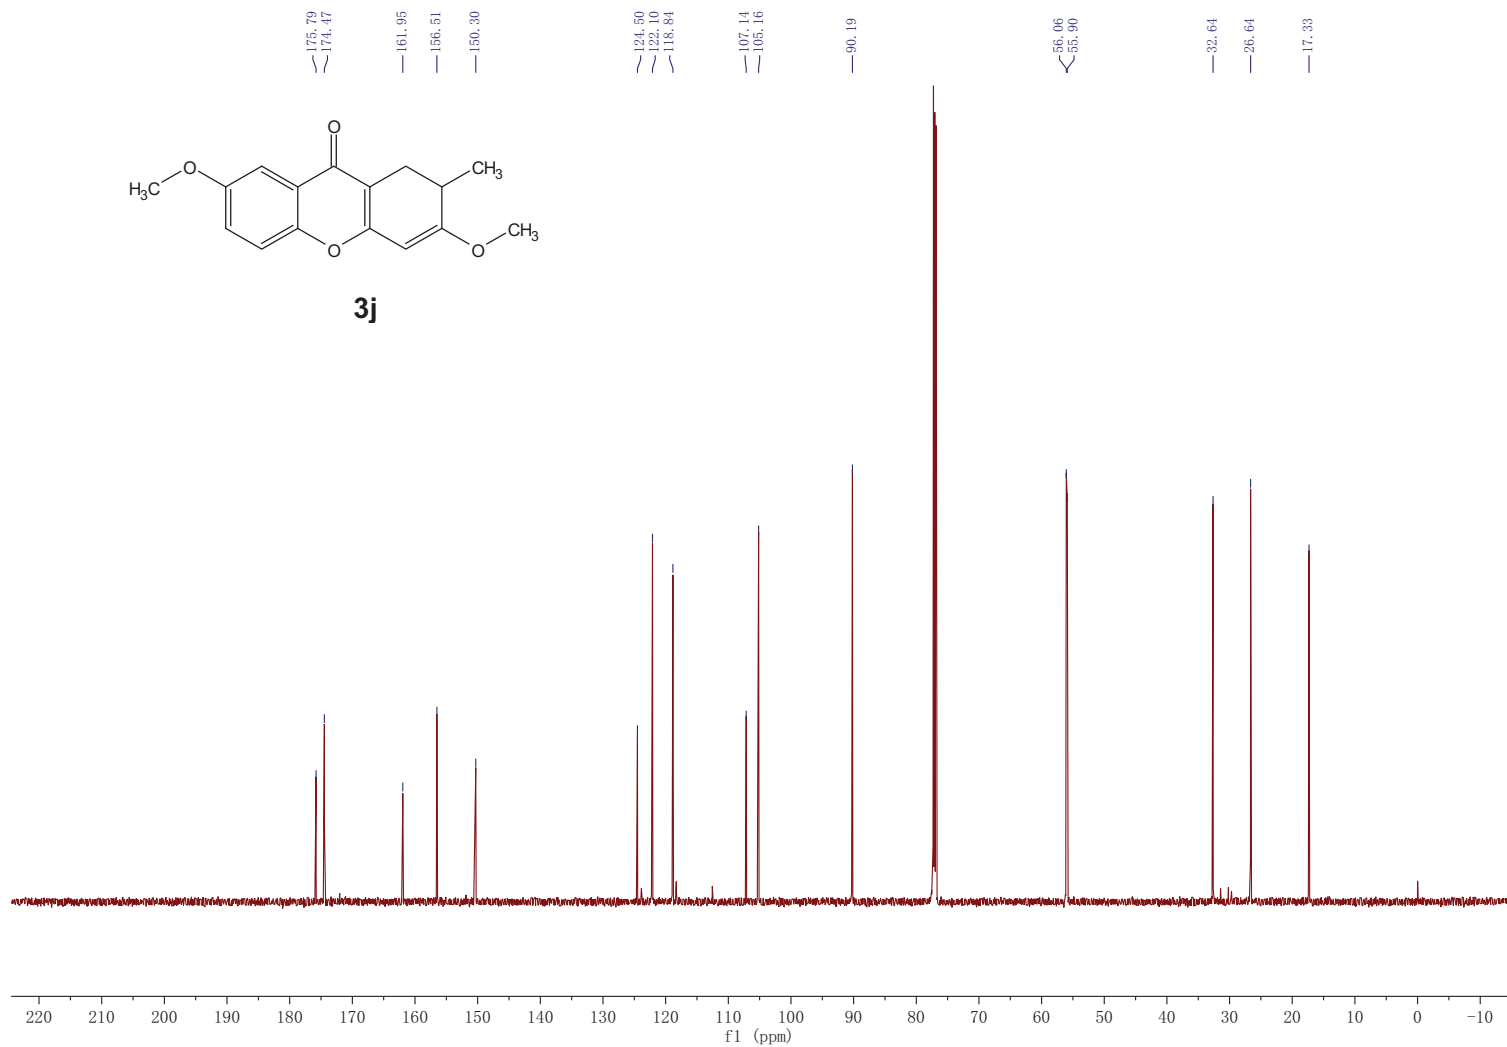

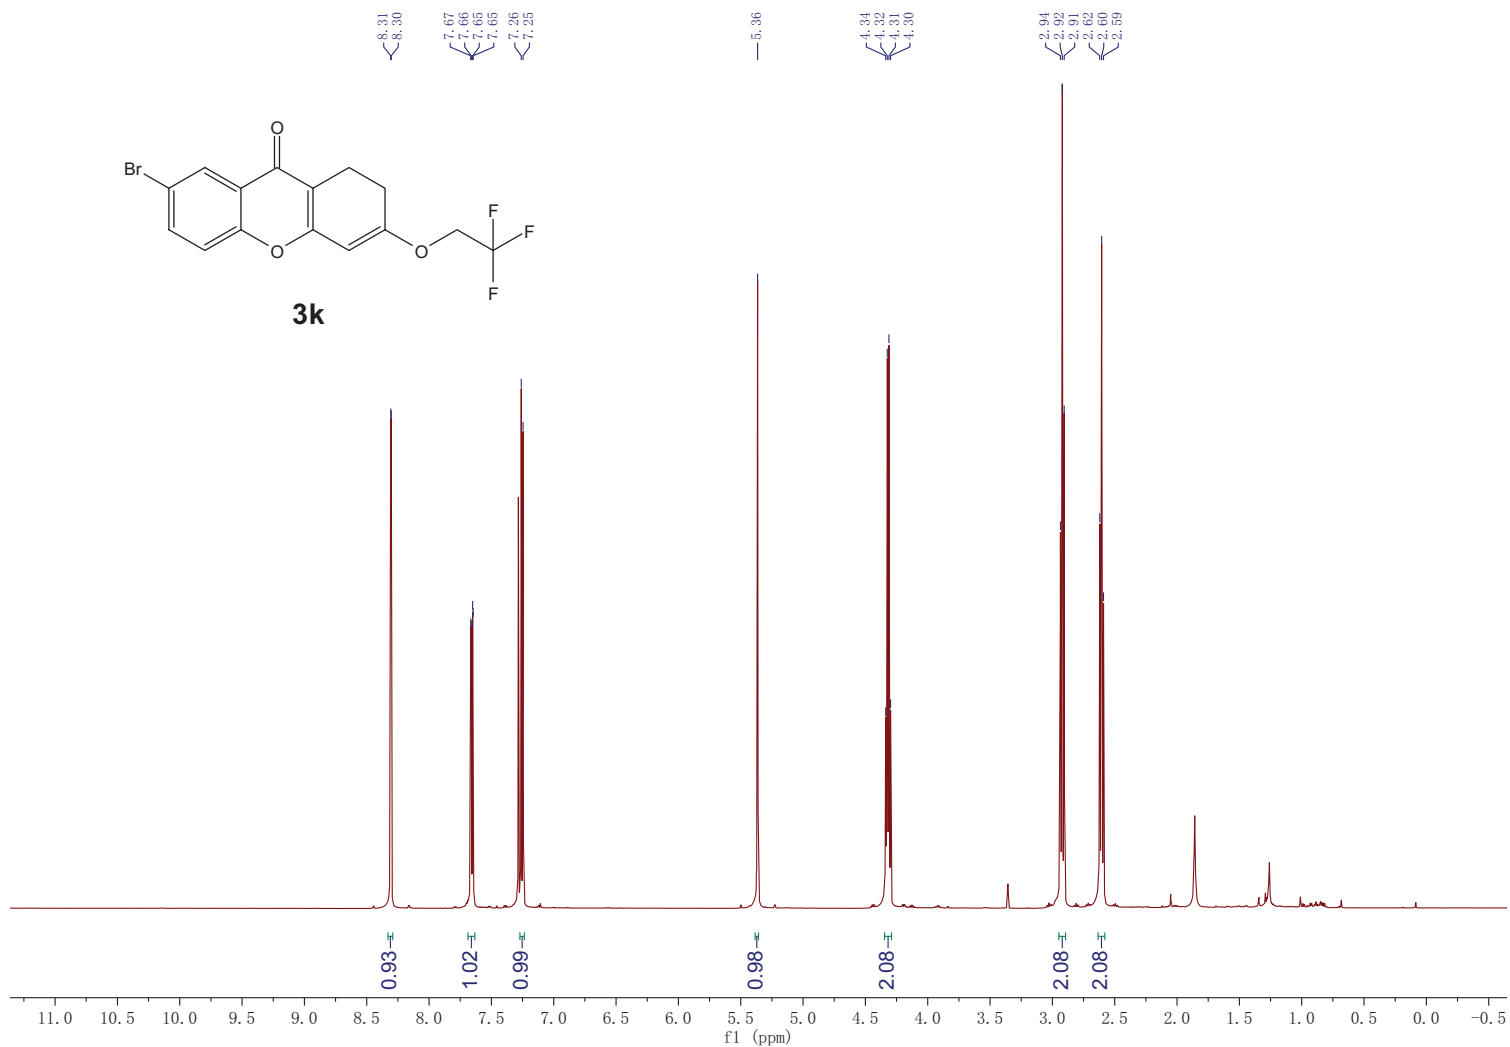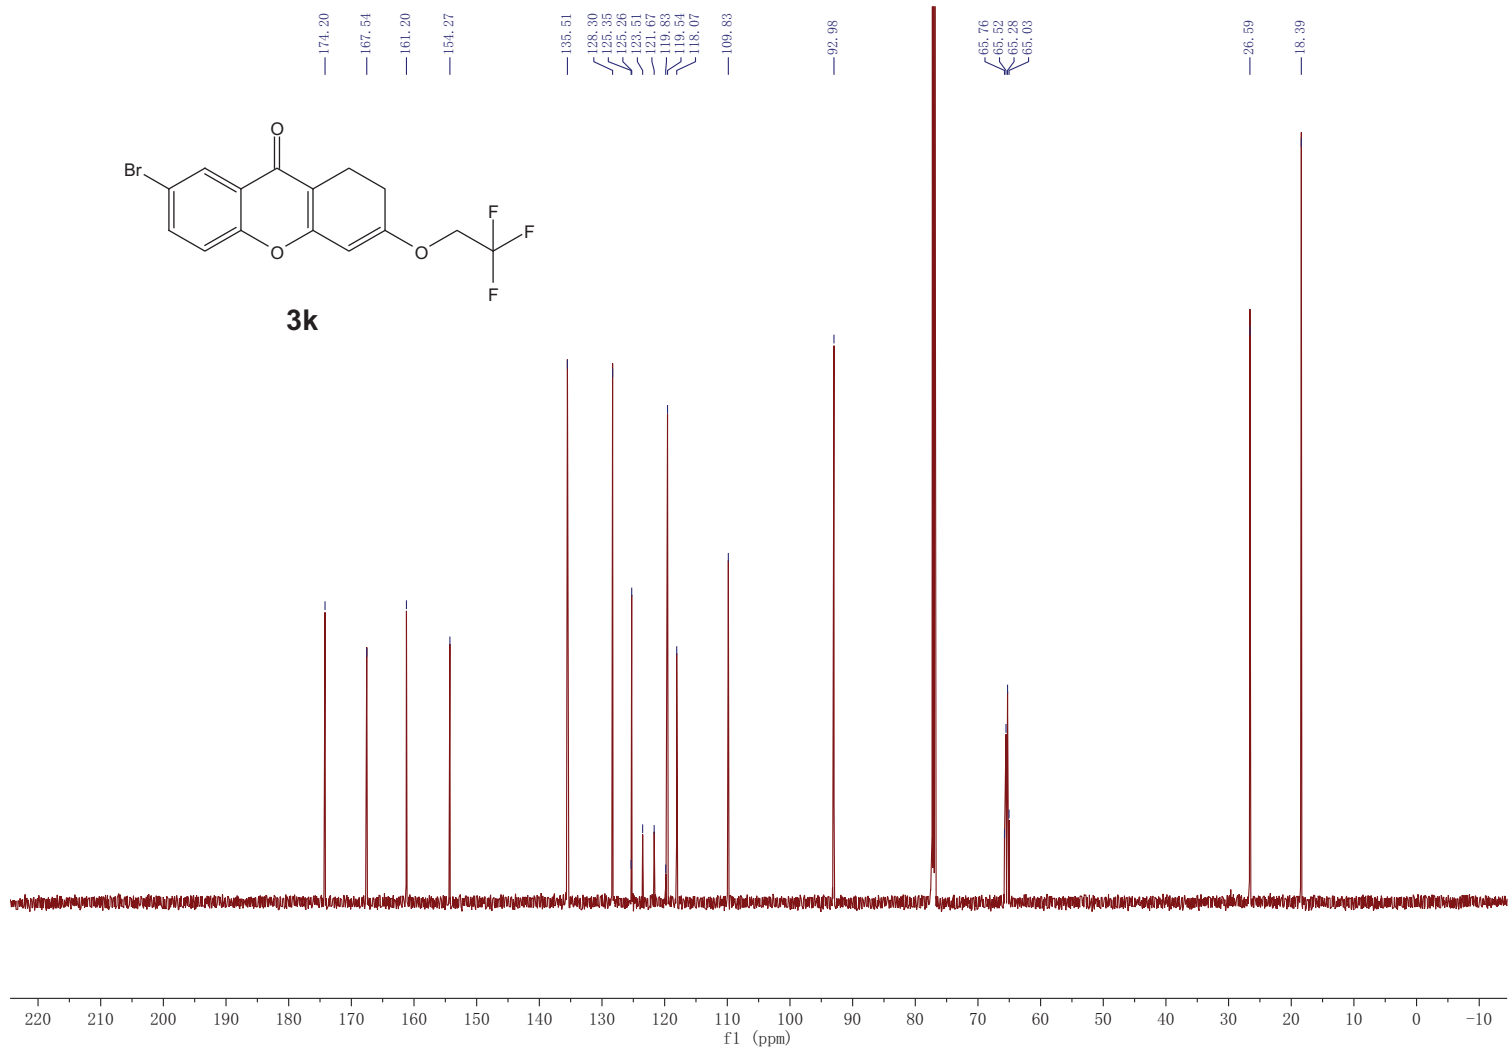

<sup>19</sup>F NMR

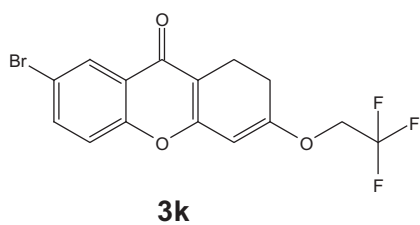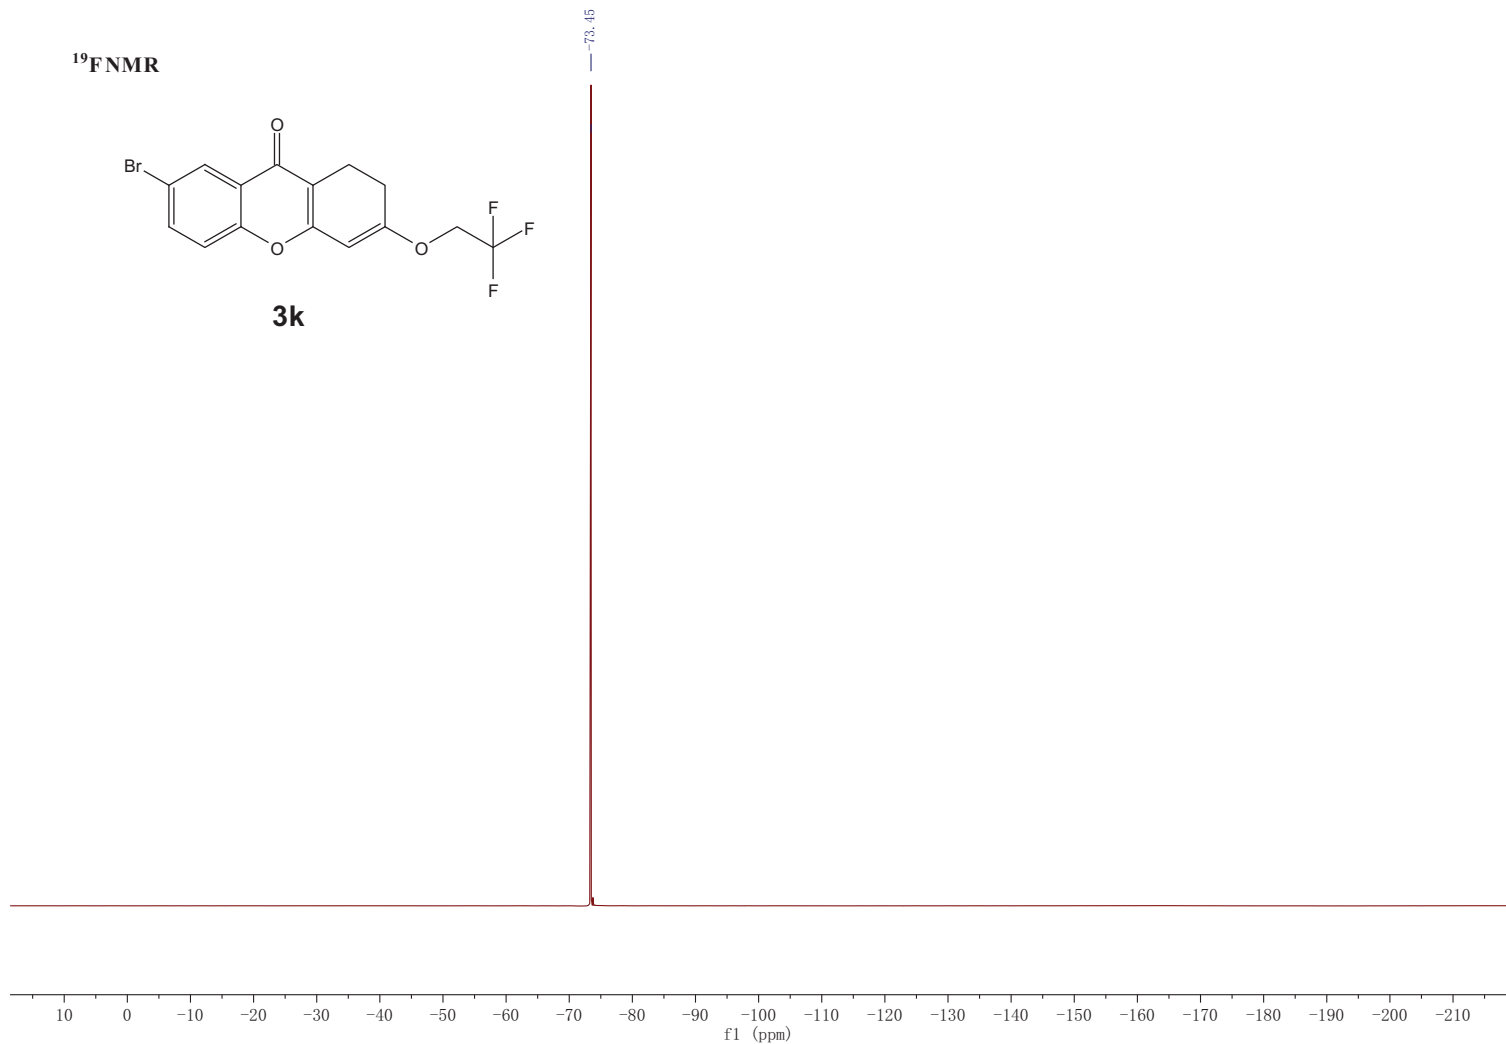

8.81, 8.80, 8.07, 8.06, 7.91, 7.90, 7.89, 7.83, 7.60, 7.58, 7.57, 7.52, 7.51, 7.50, 7.49, 7.49, 5.41, 3.85, 3.02, 3.01, 3.00, 2.99, 2.98, 2.86, 2.85, 2.85, 2.83, 2.82, 2.70, 2.69, 2.68, 2.67, 2.21, 1.20, 1.19

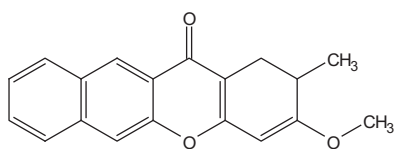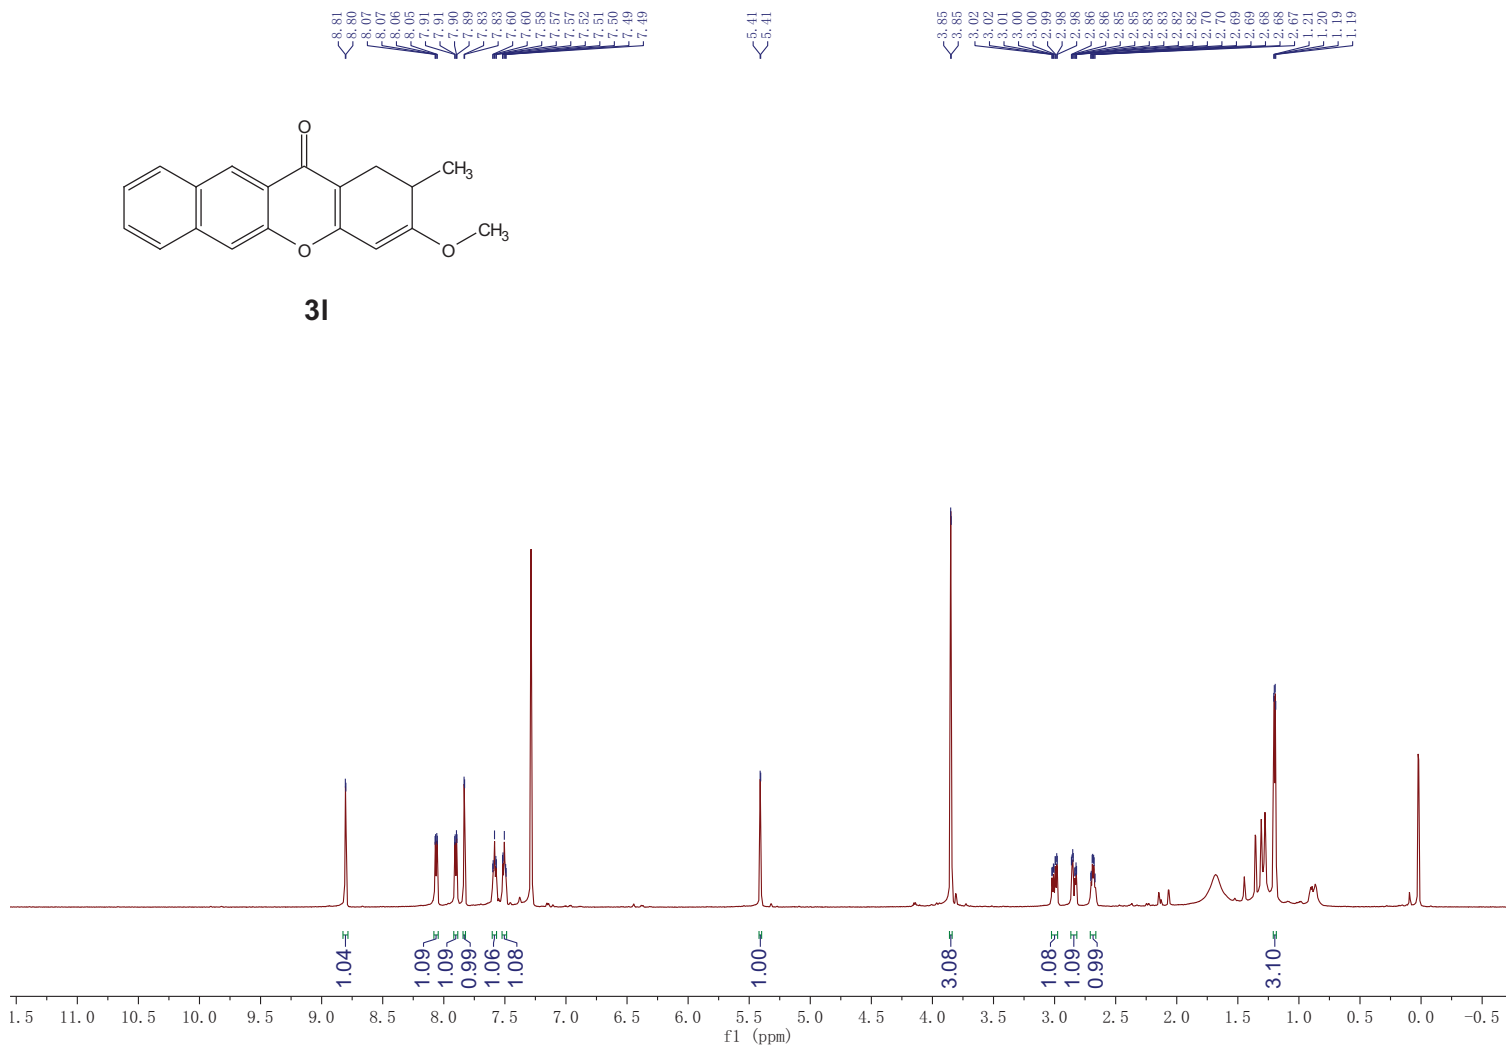

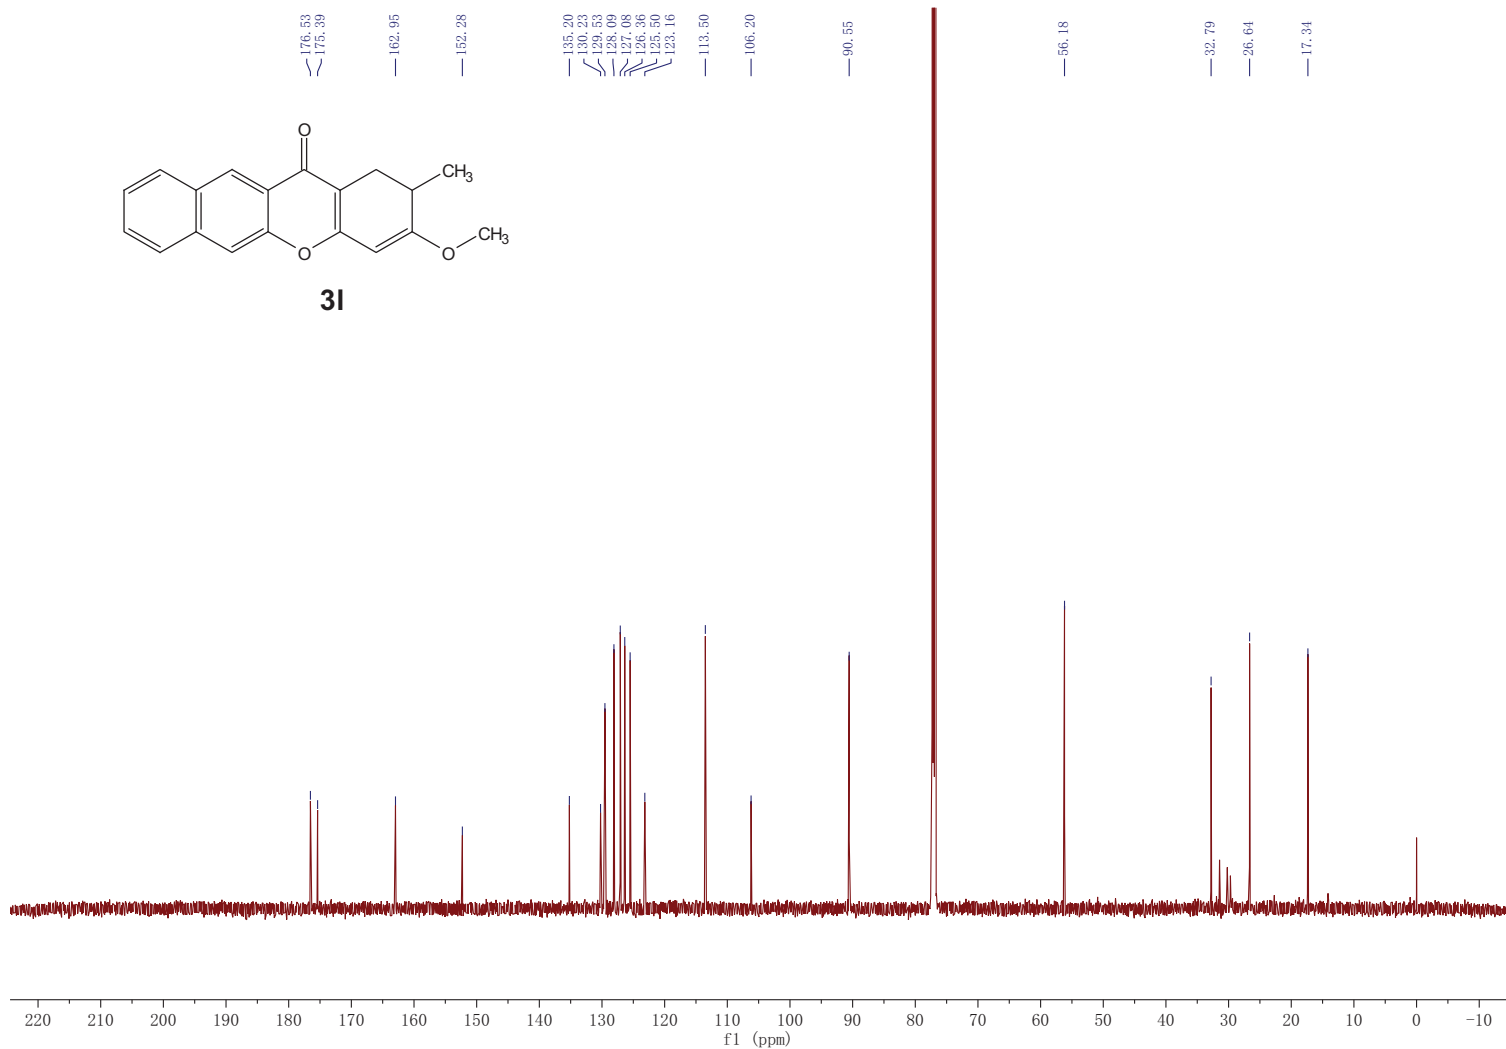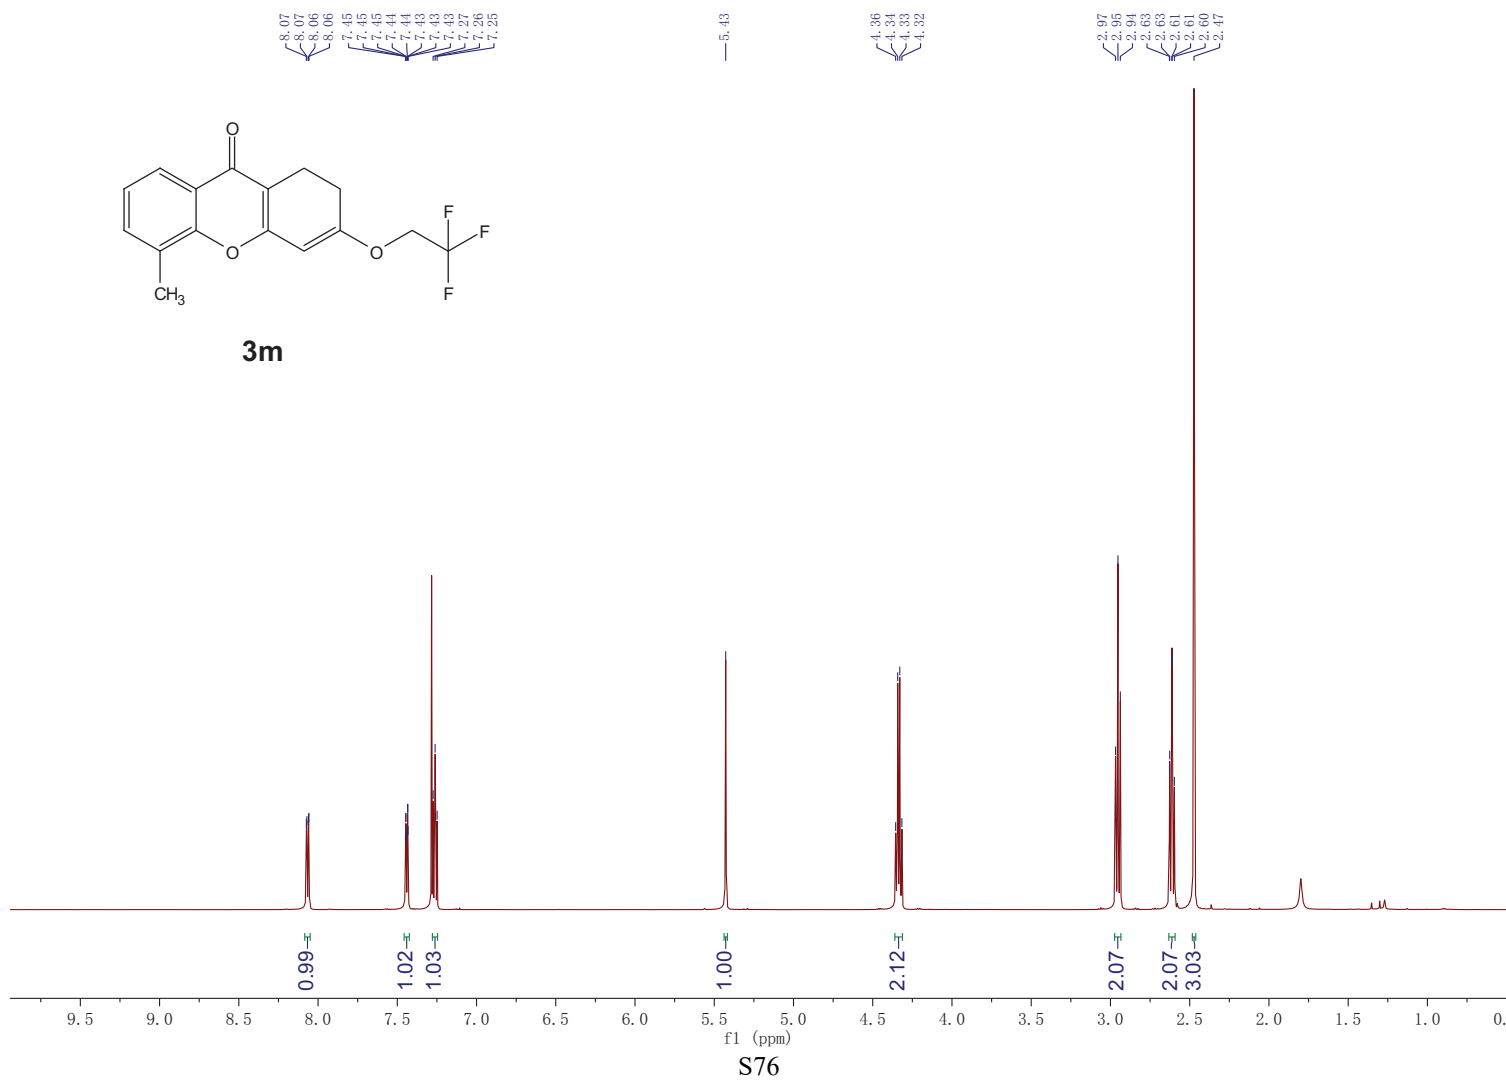

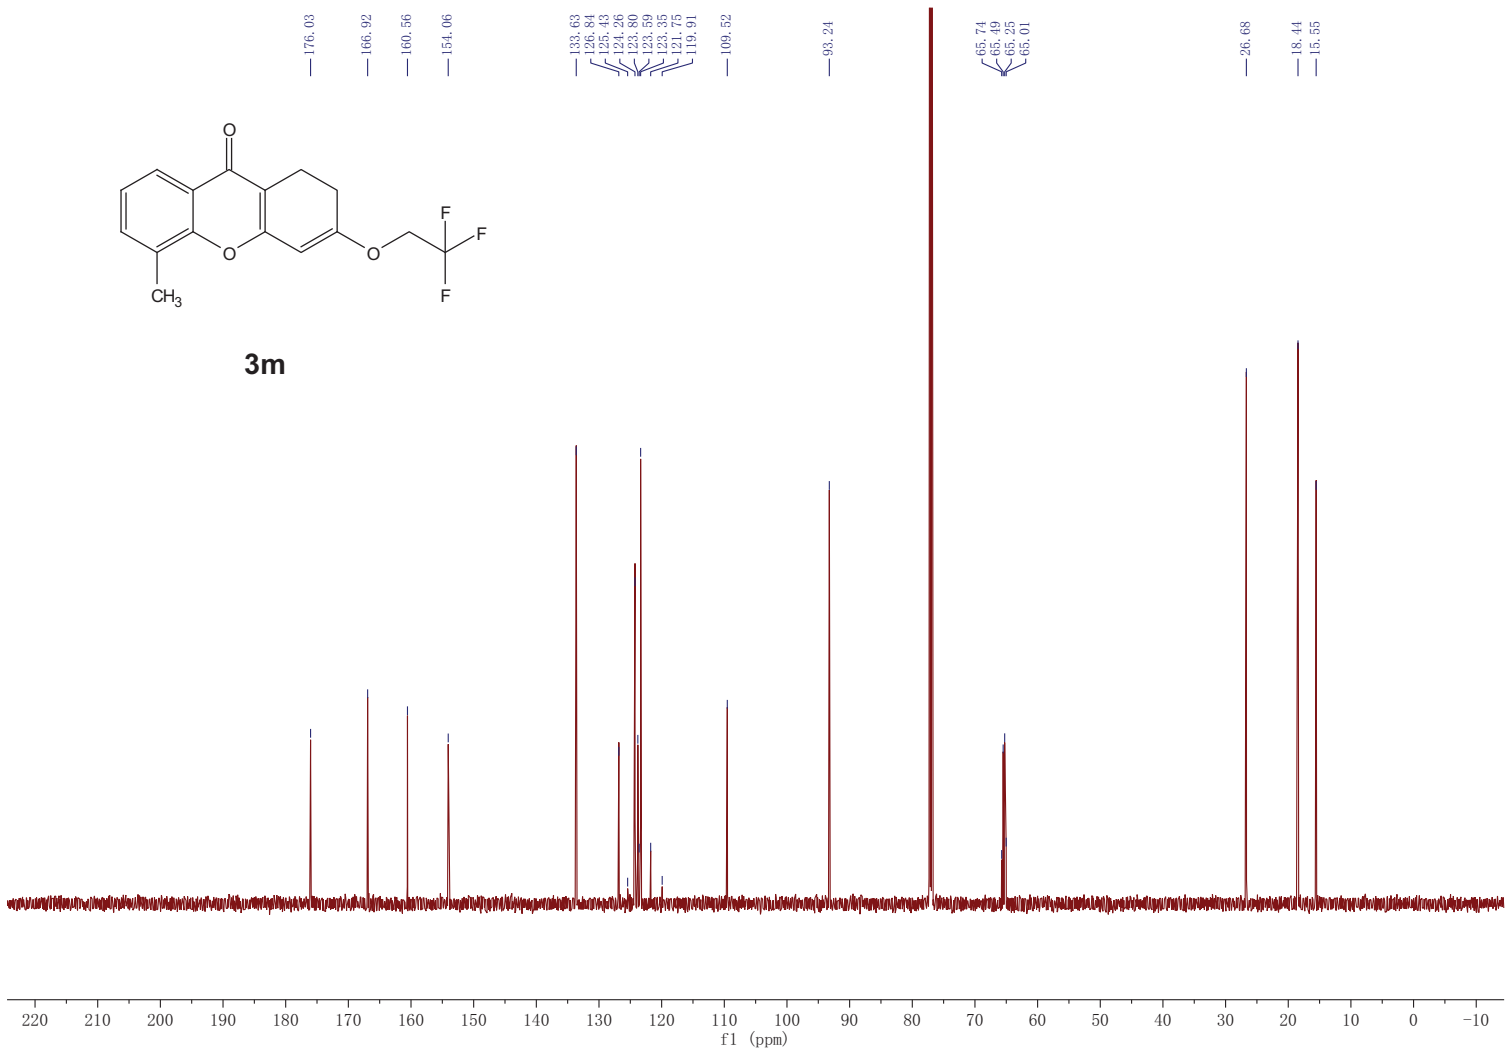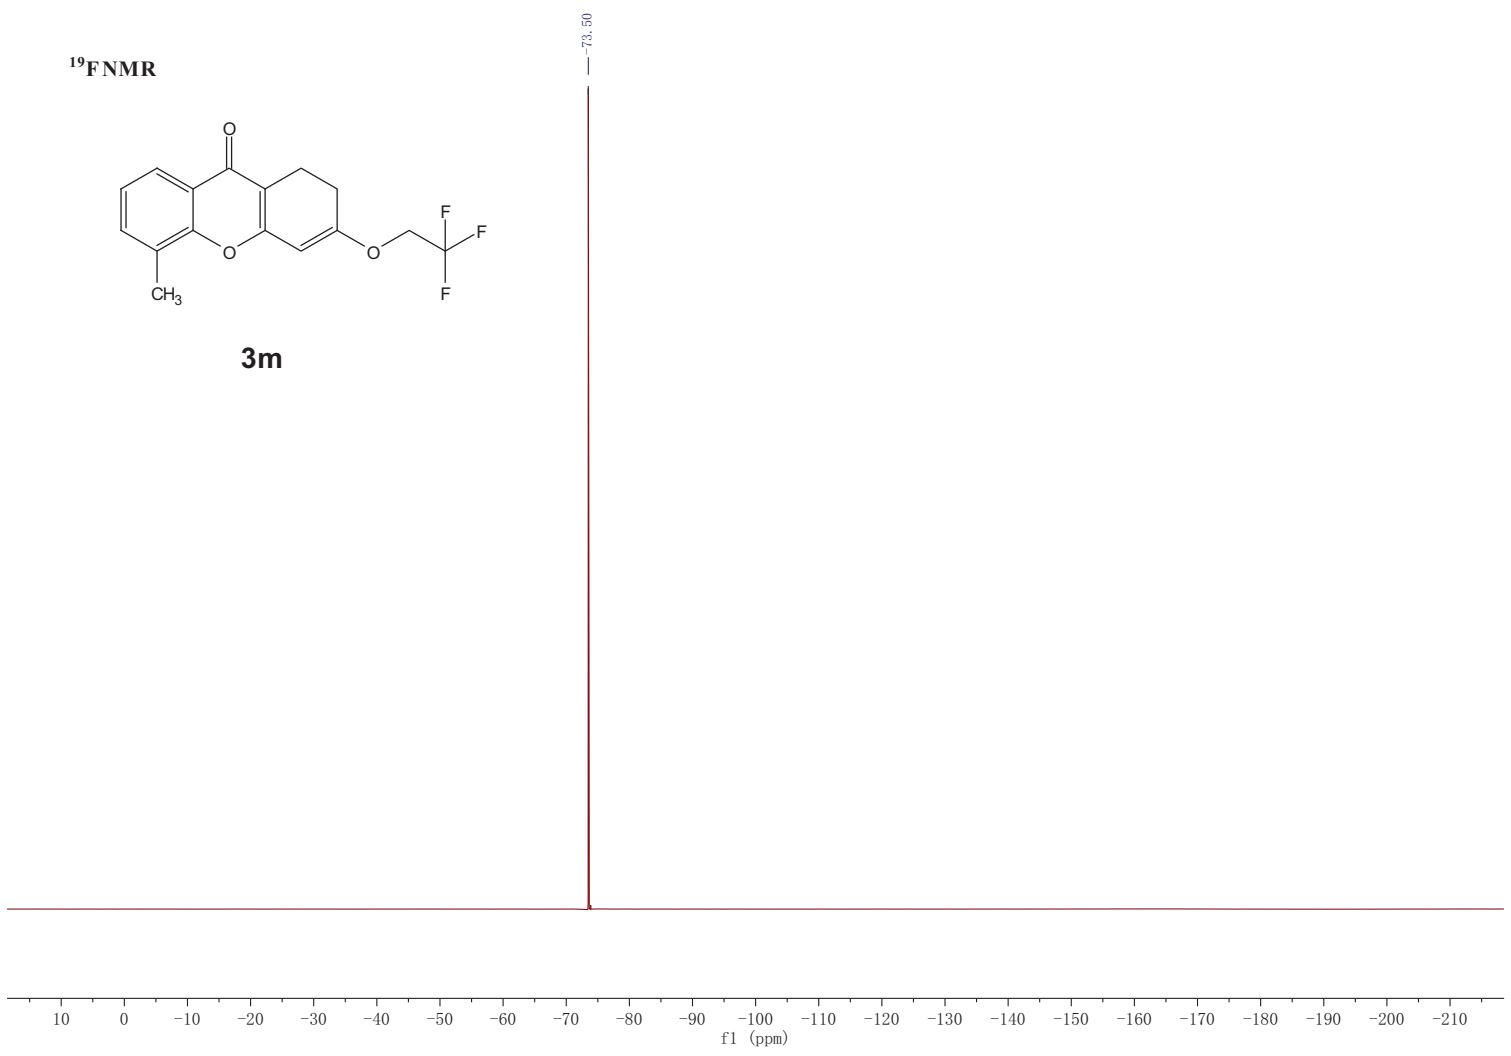

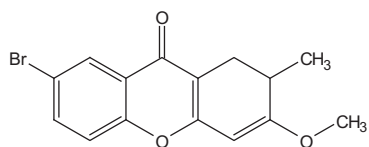

3n

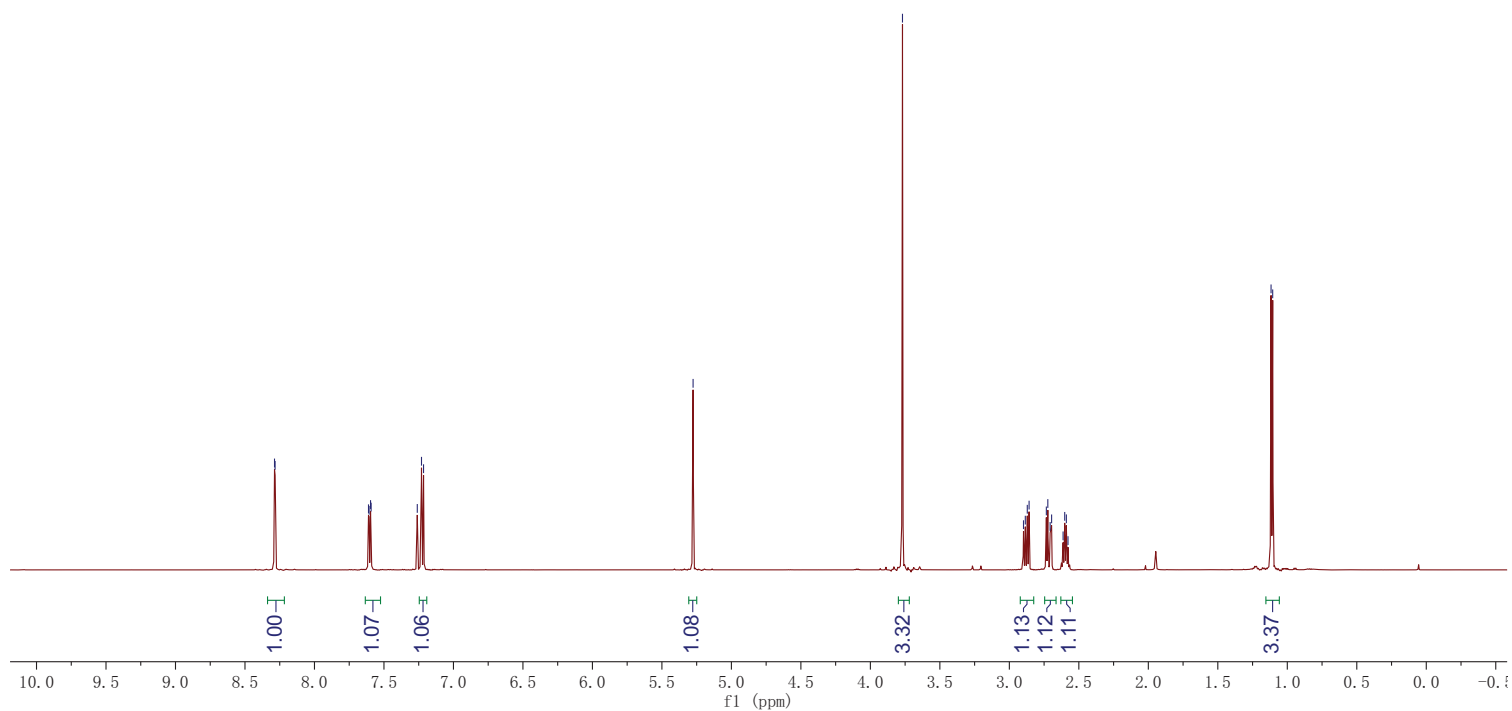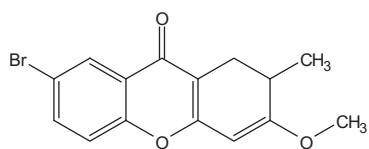

3n

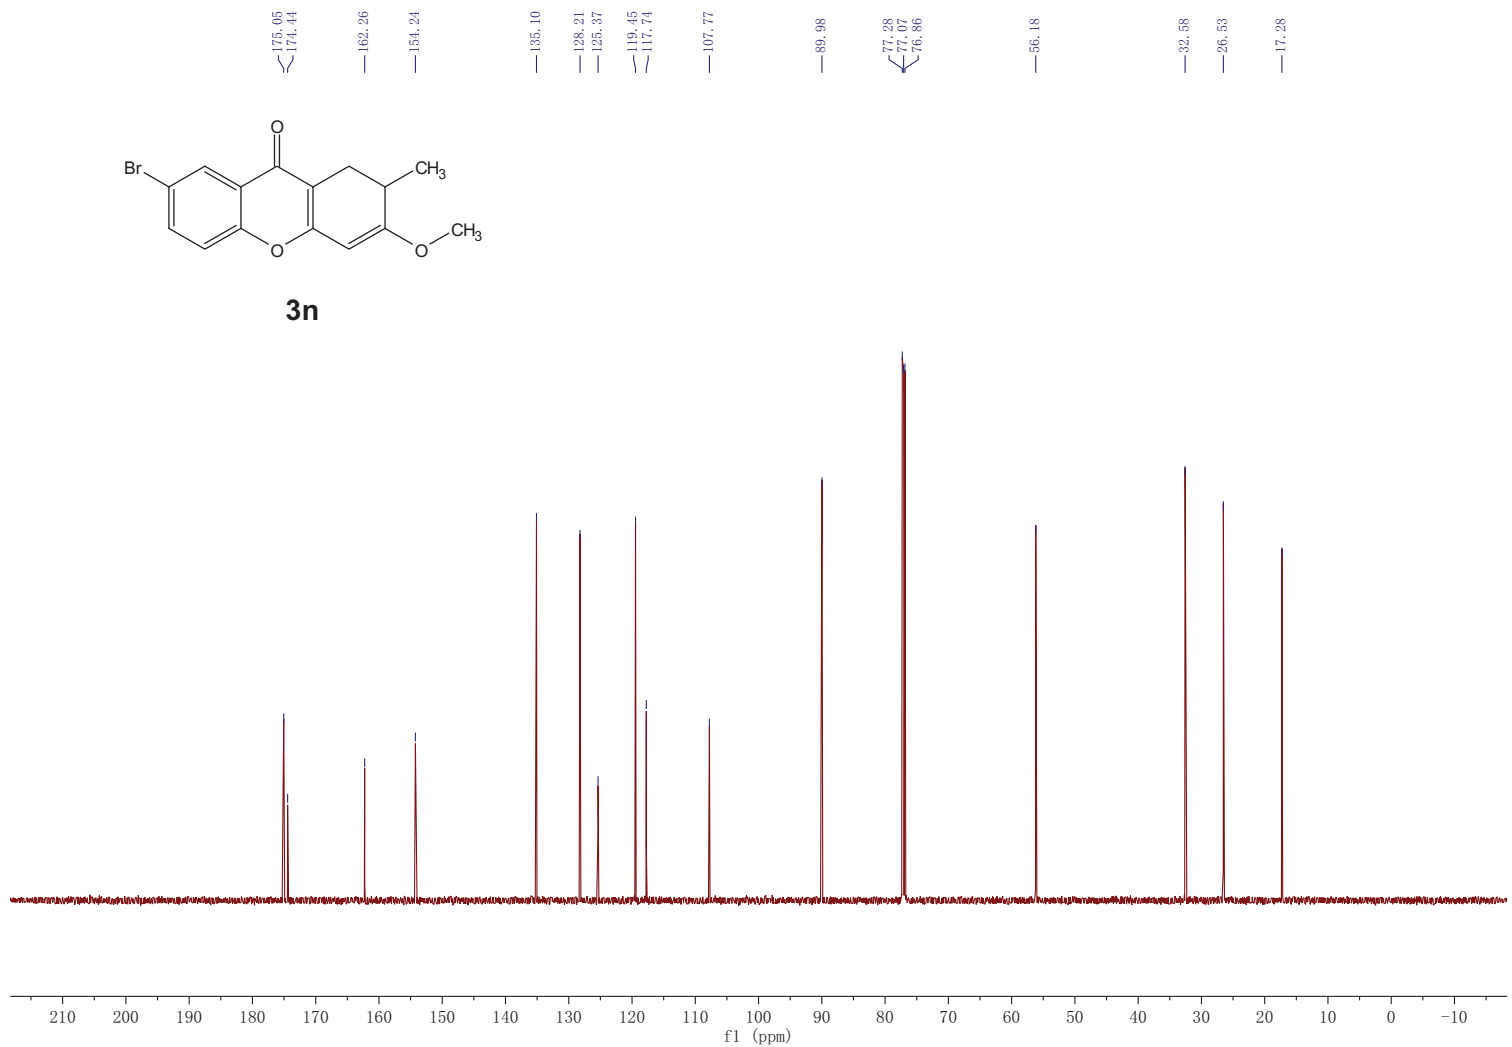

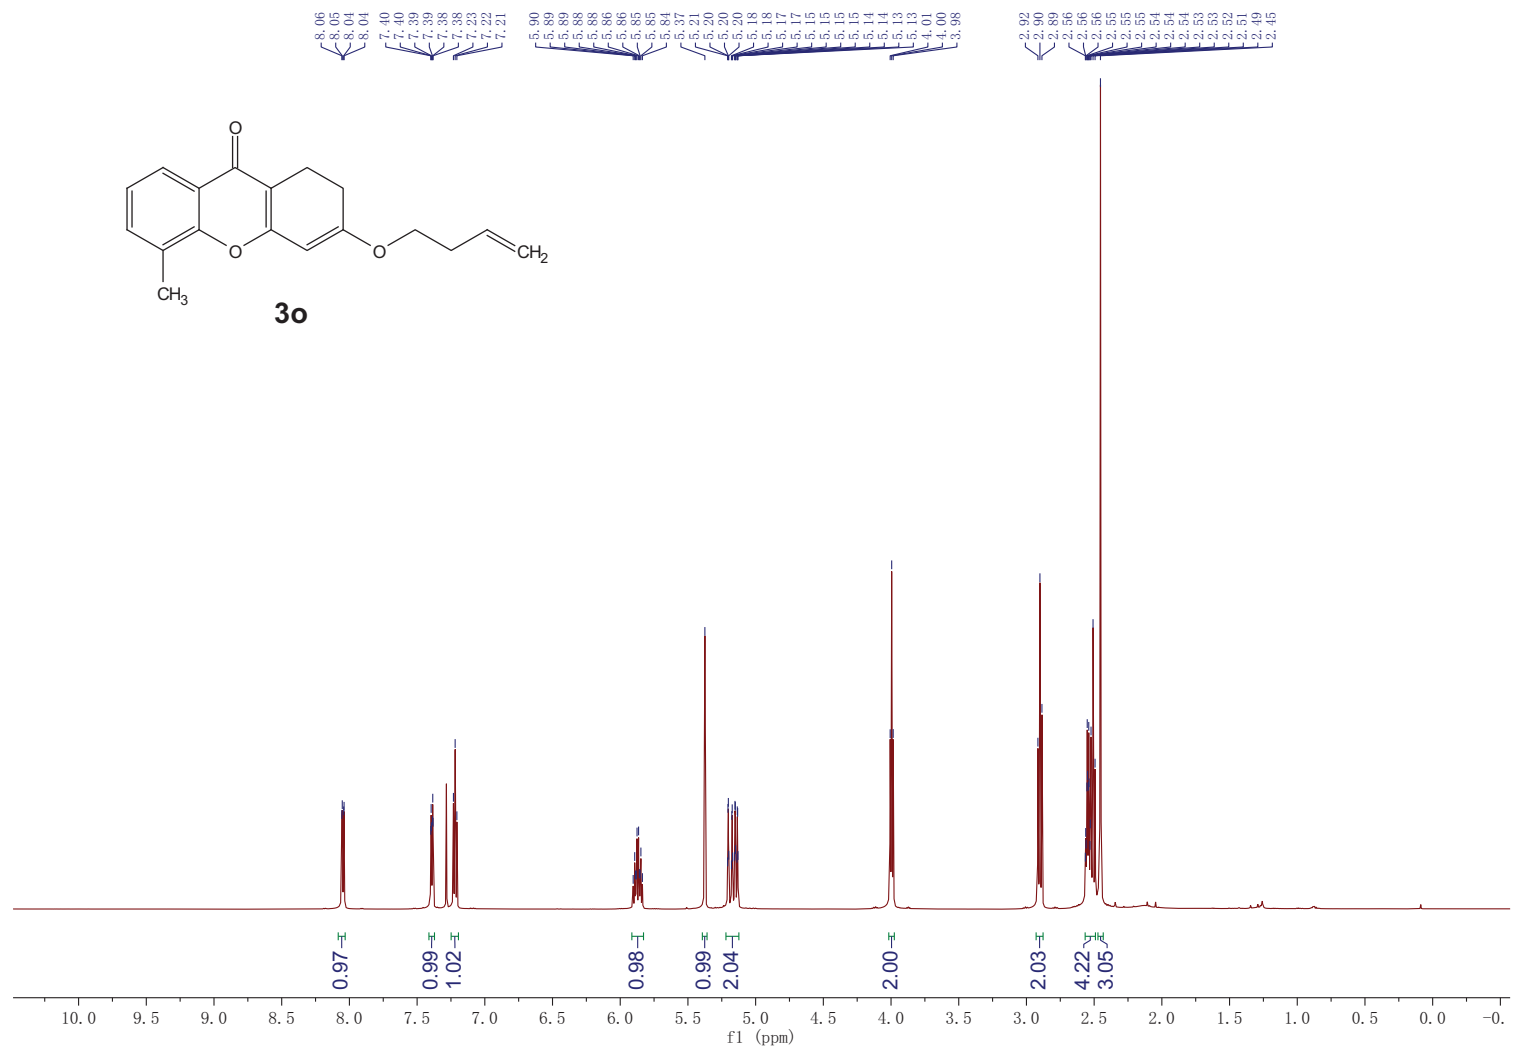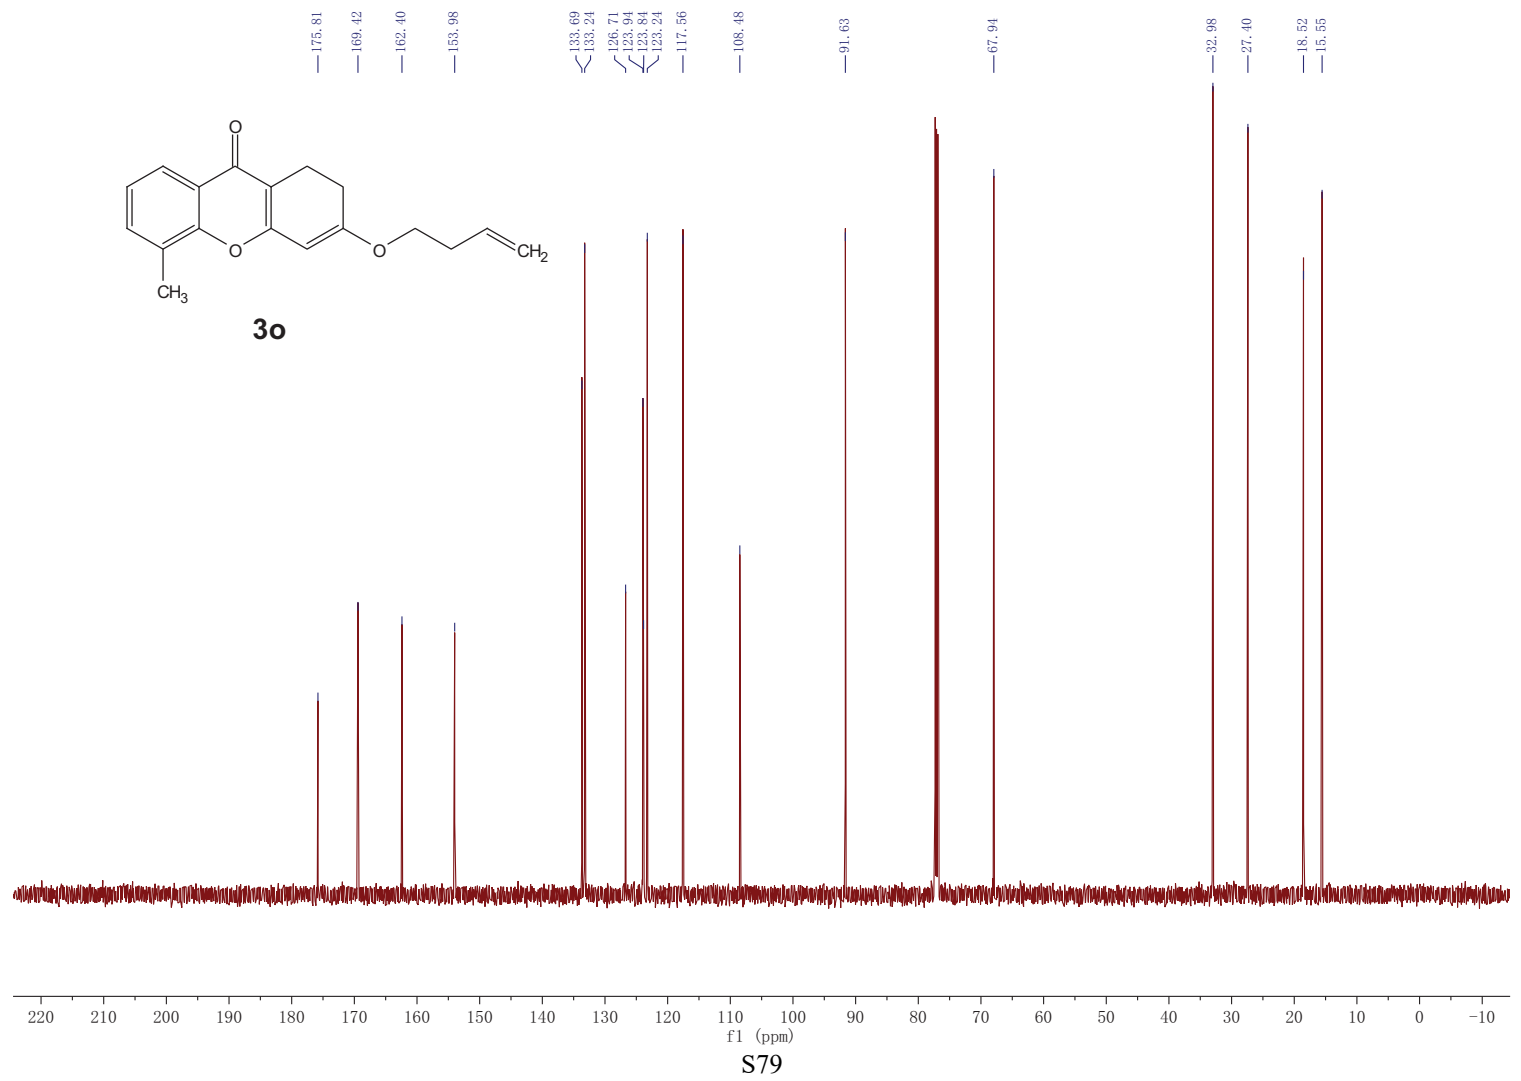

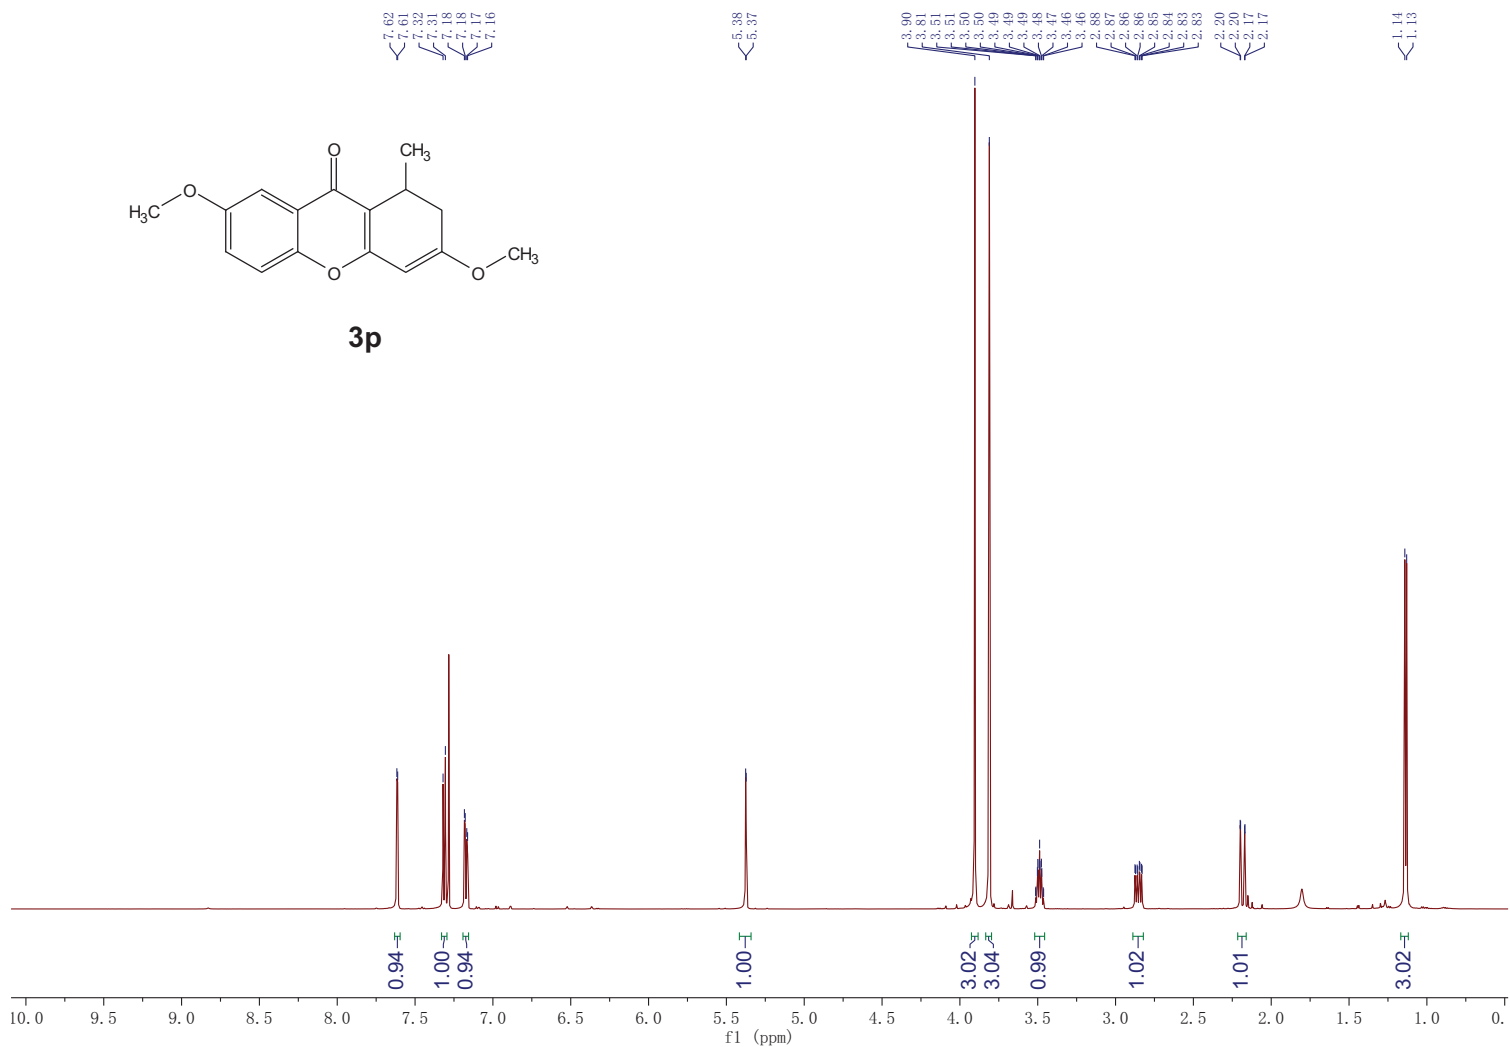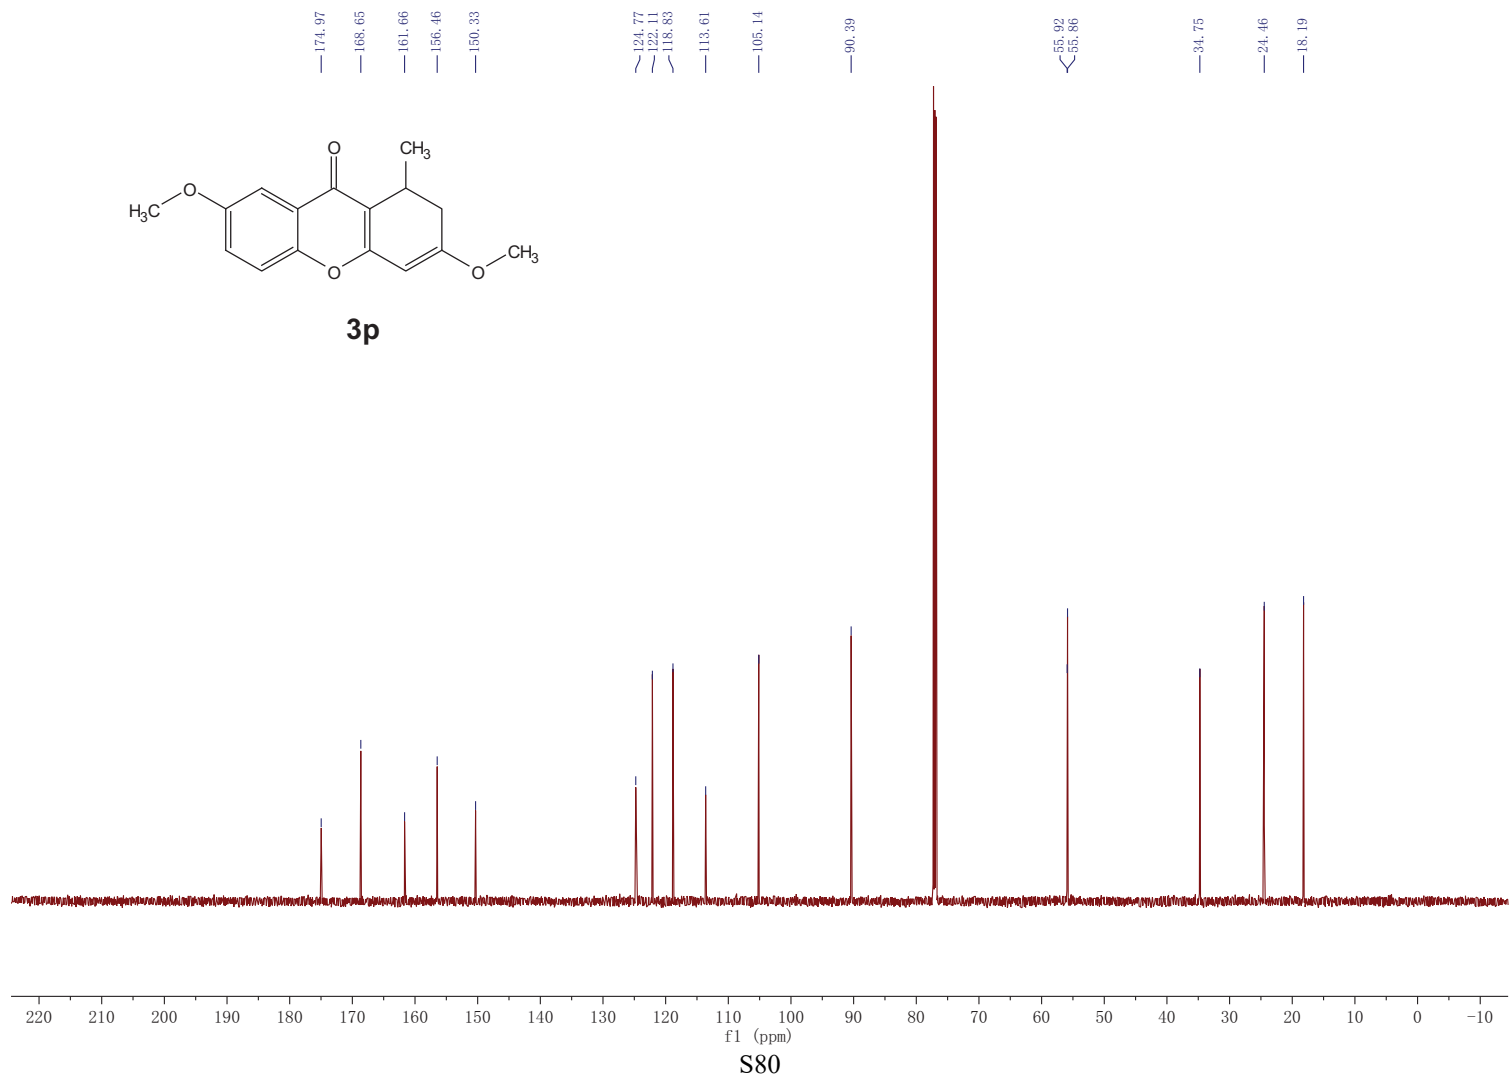



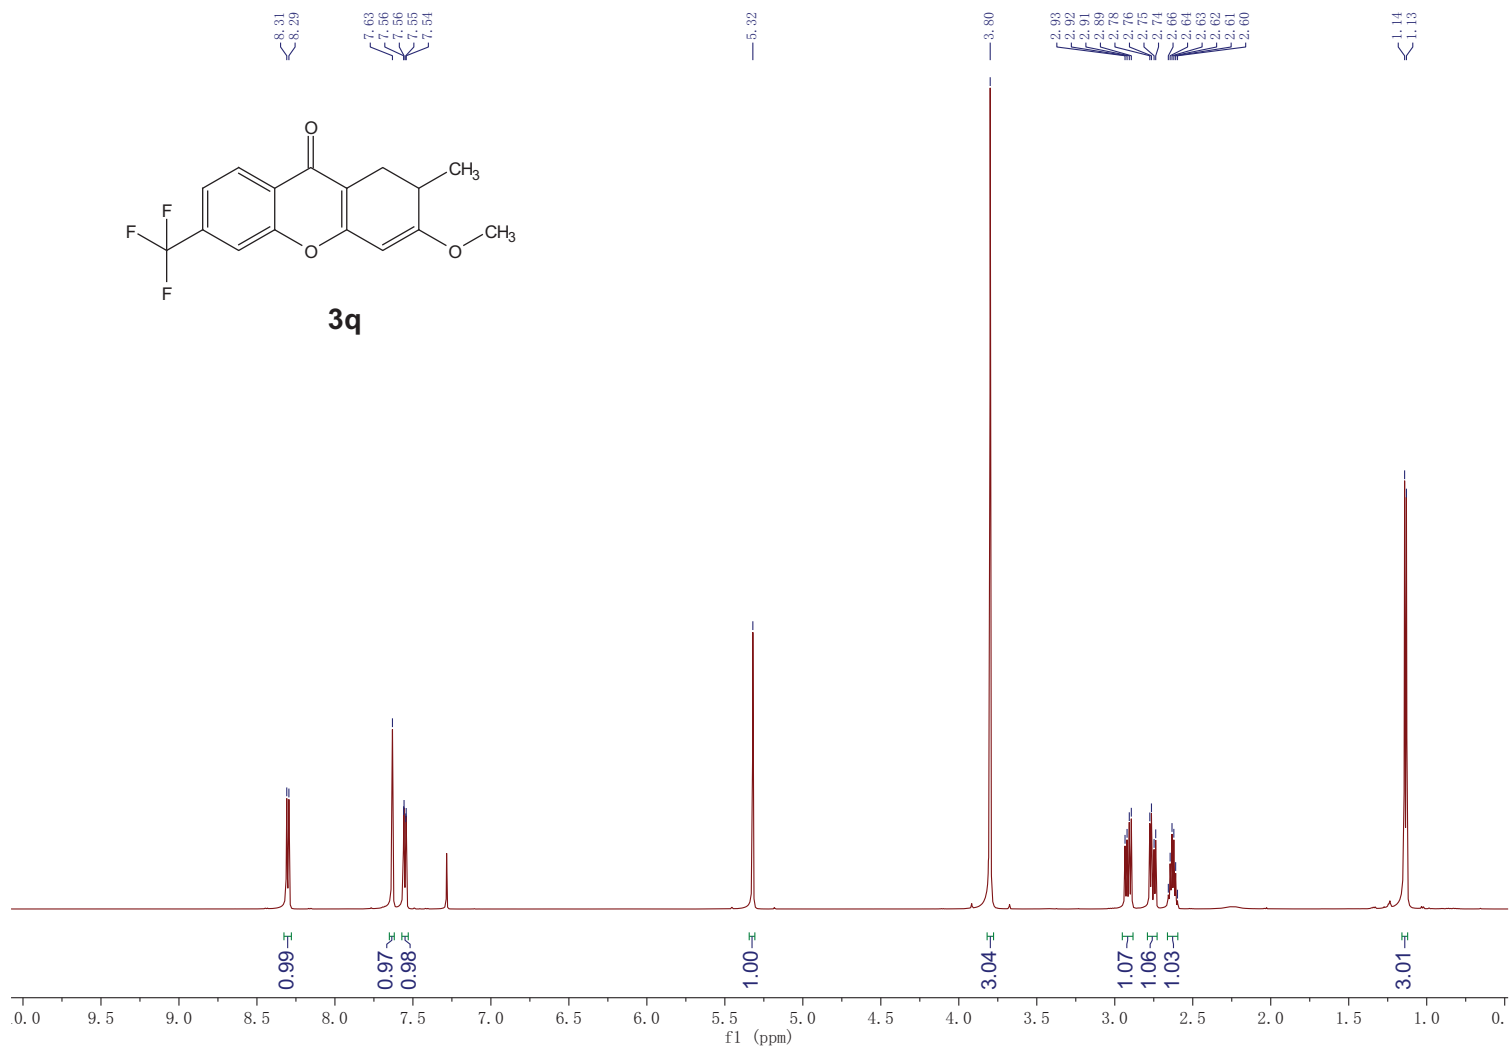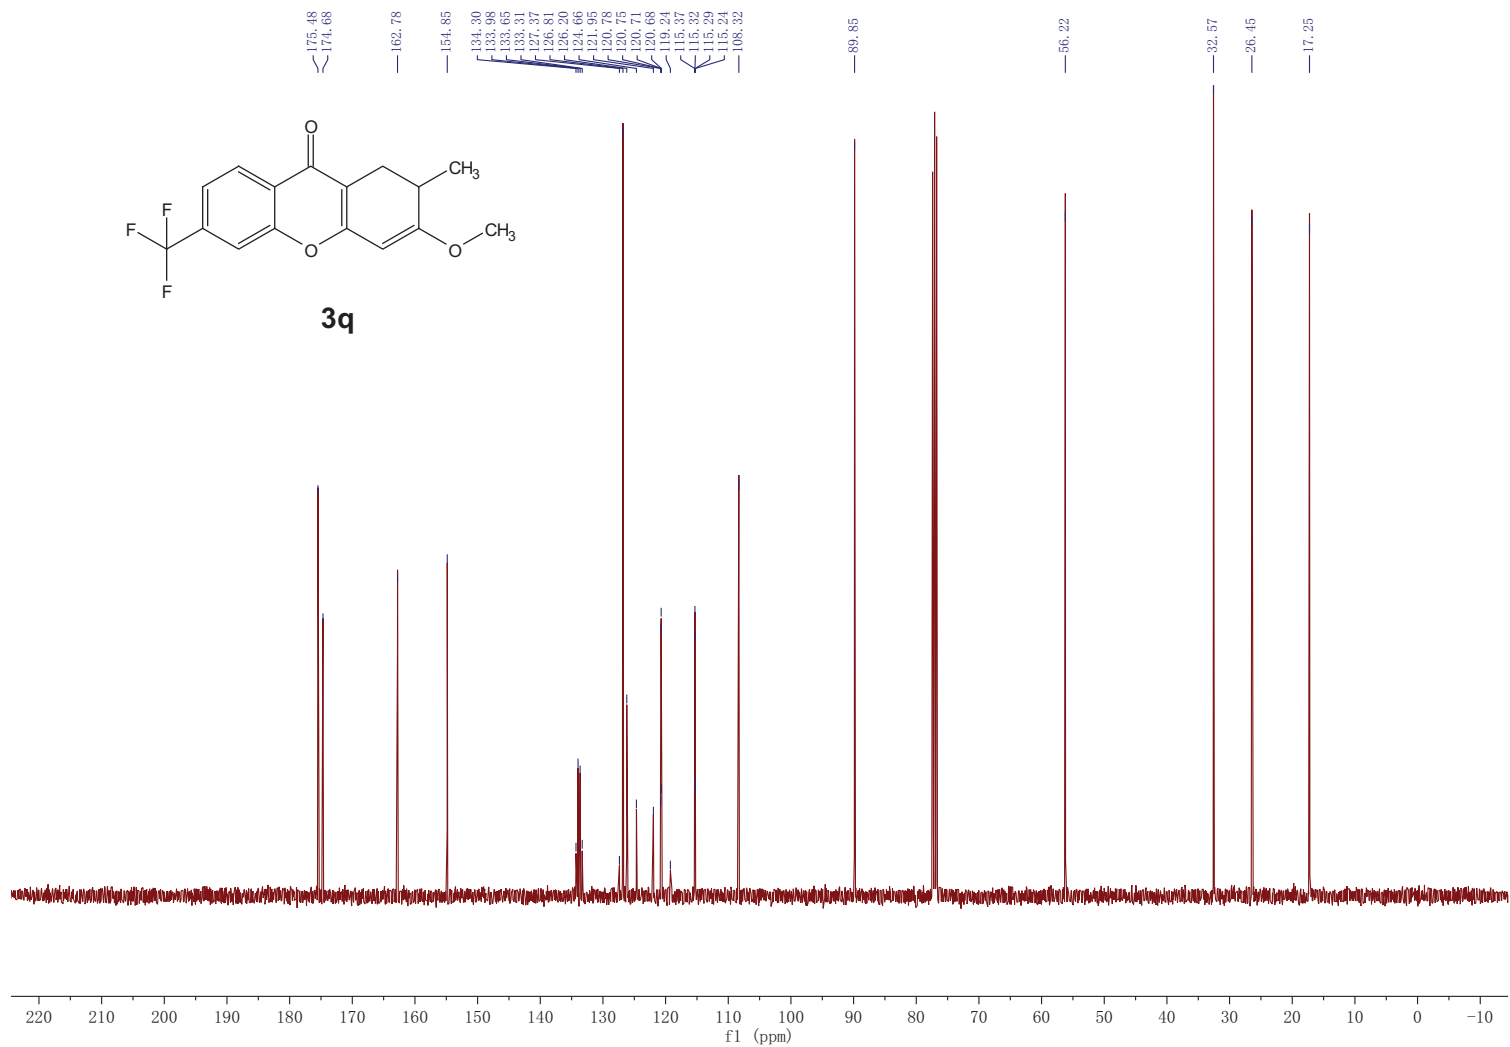

<sup>19</sup>F NMR

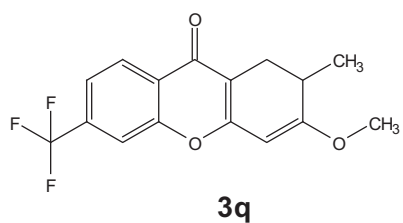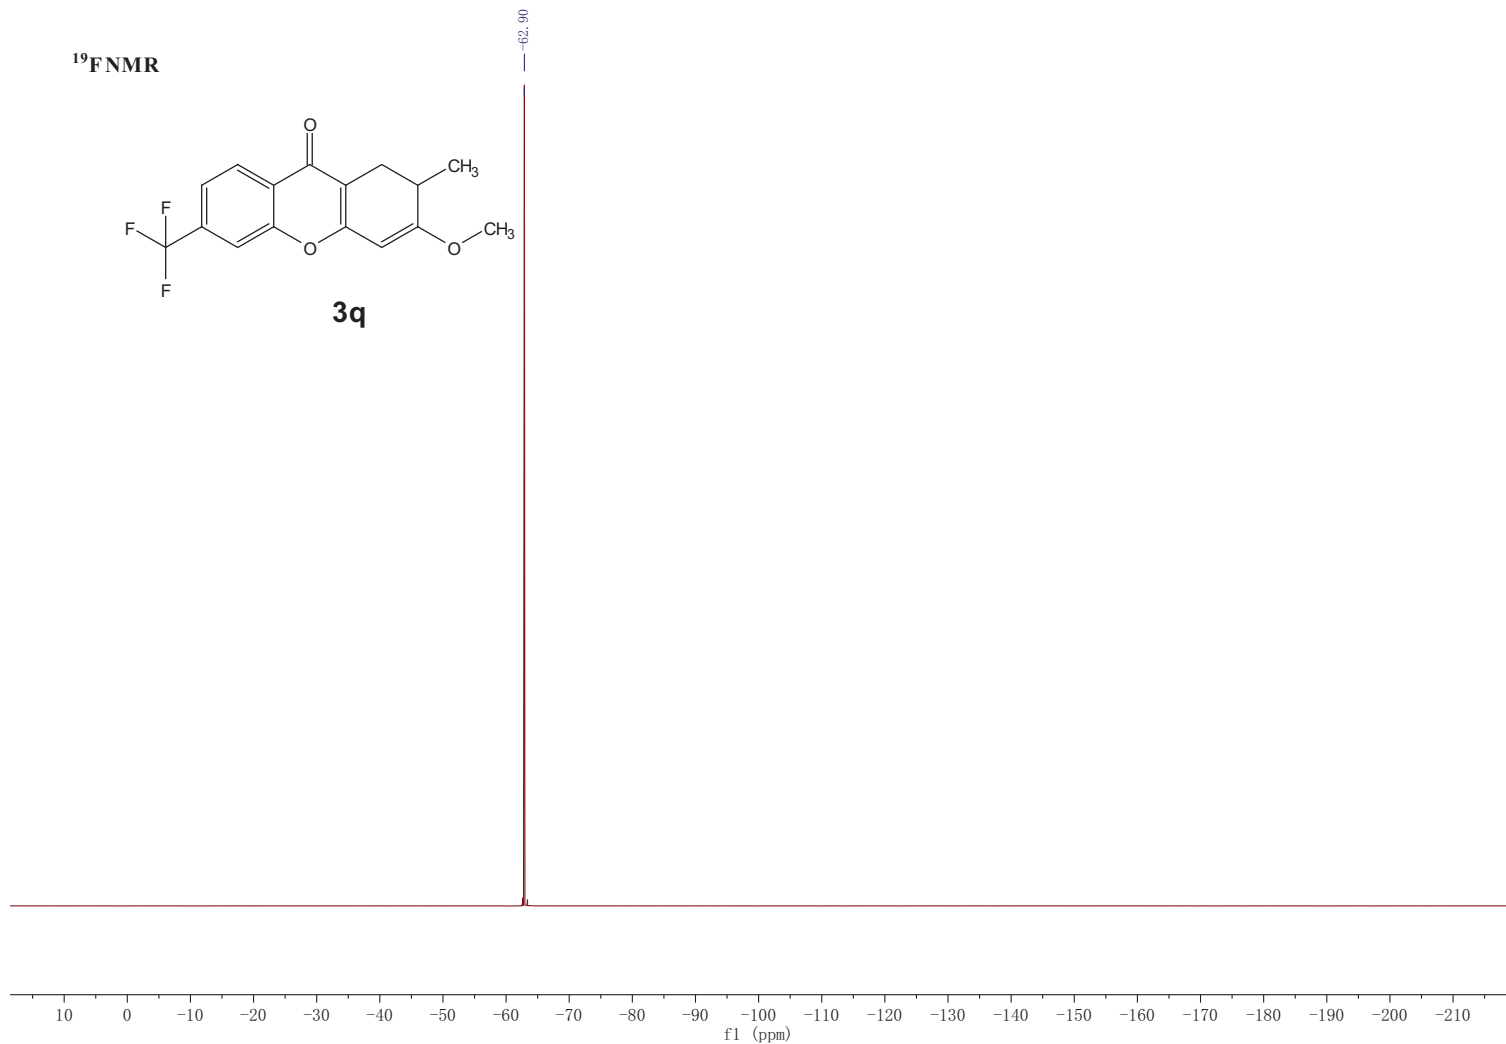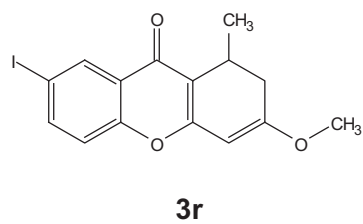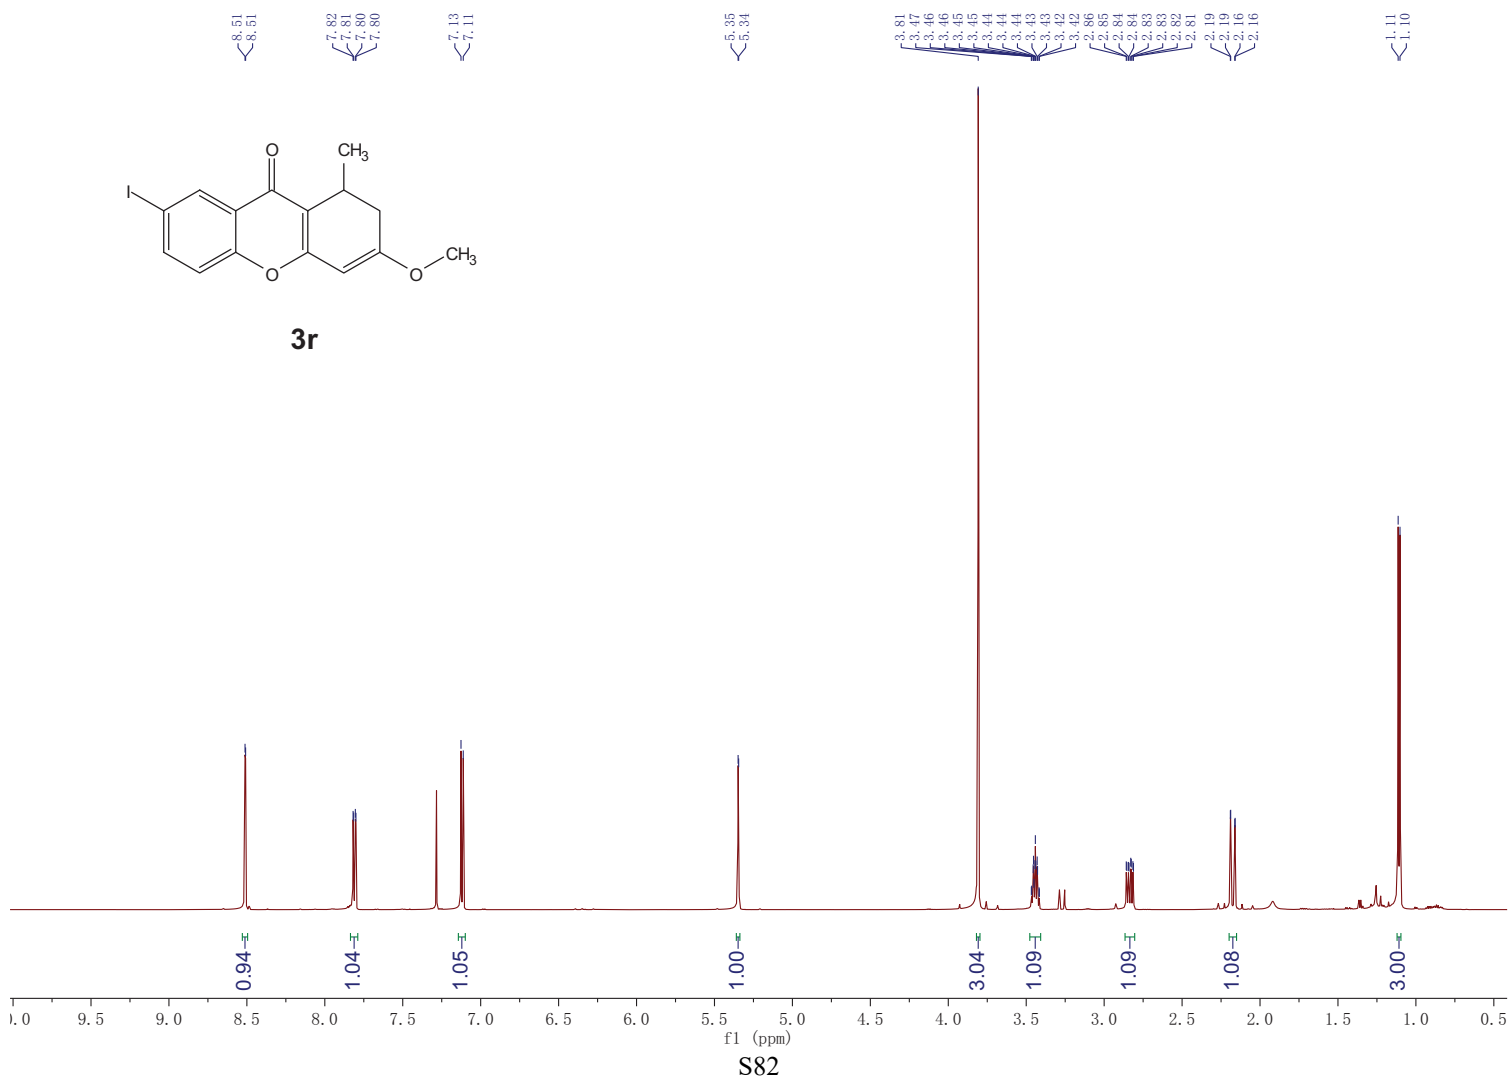

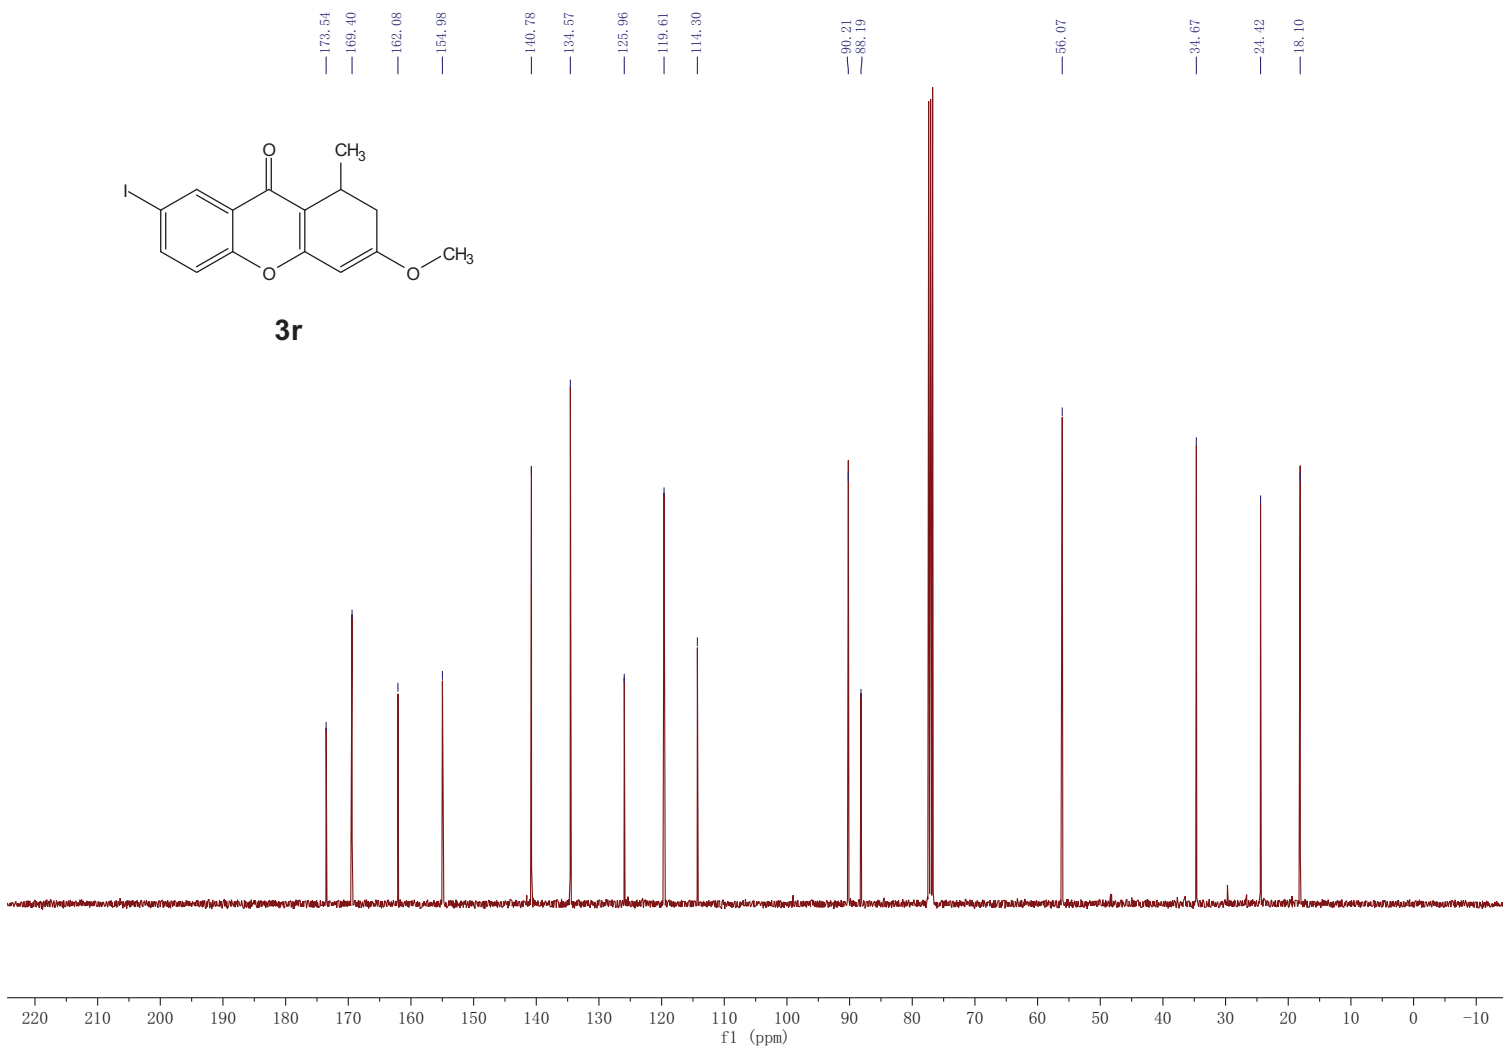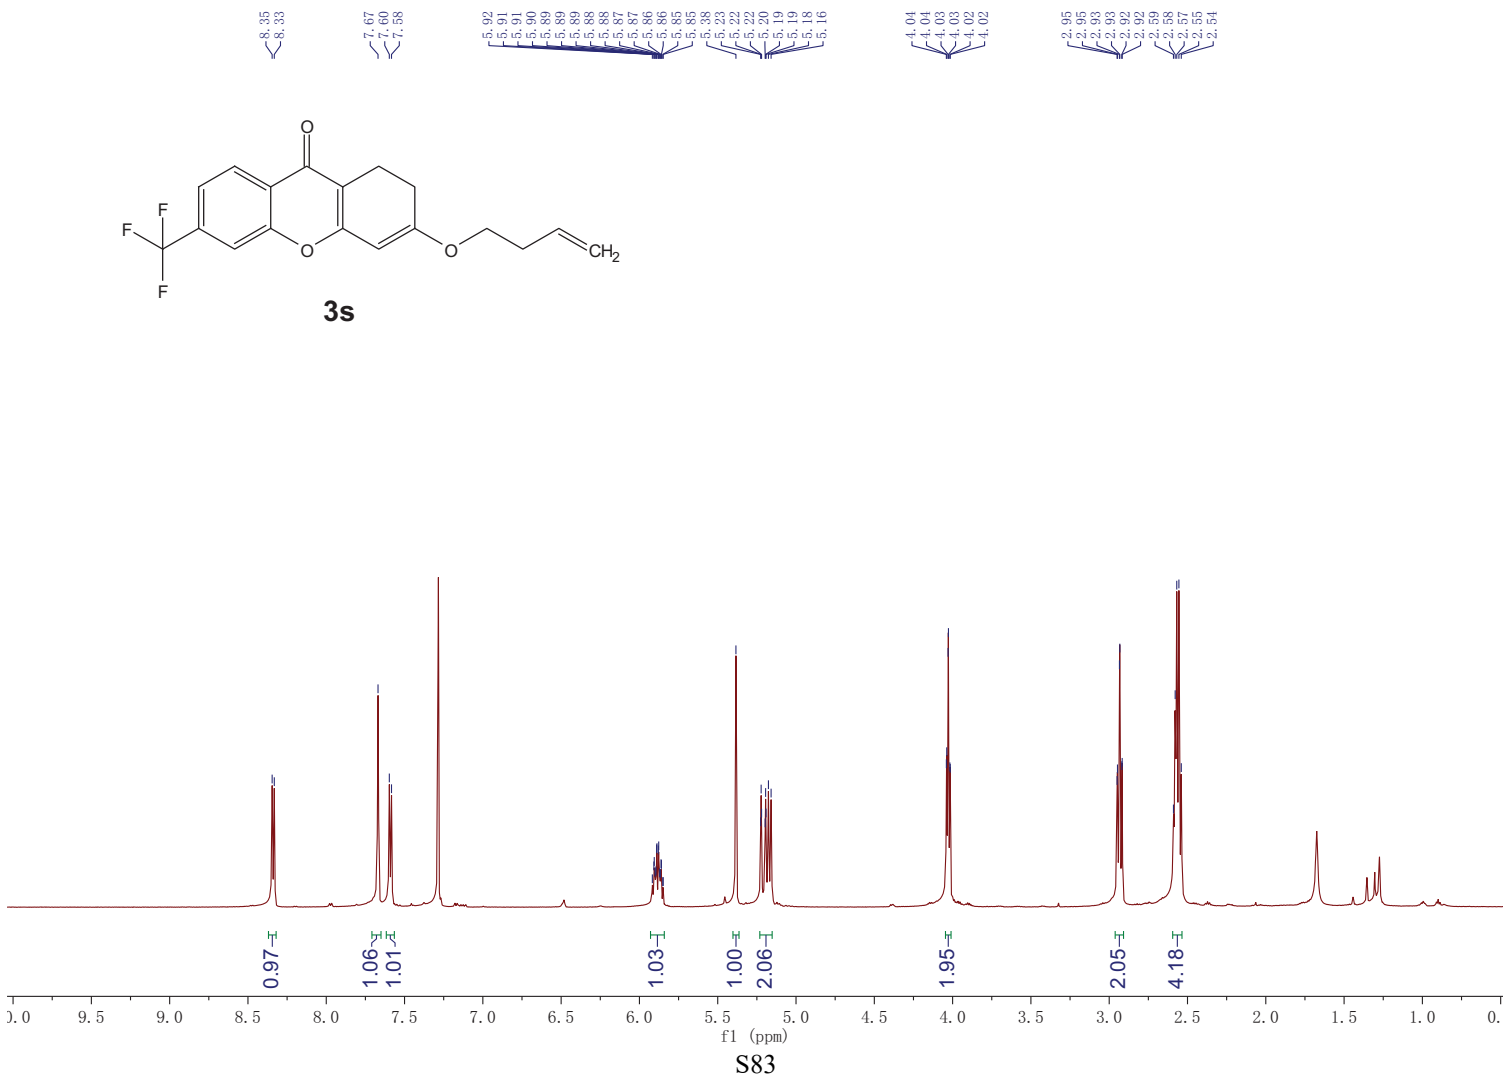

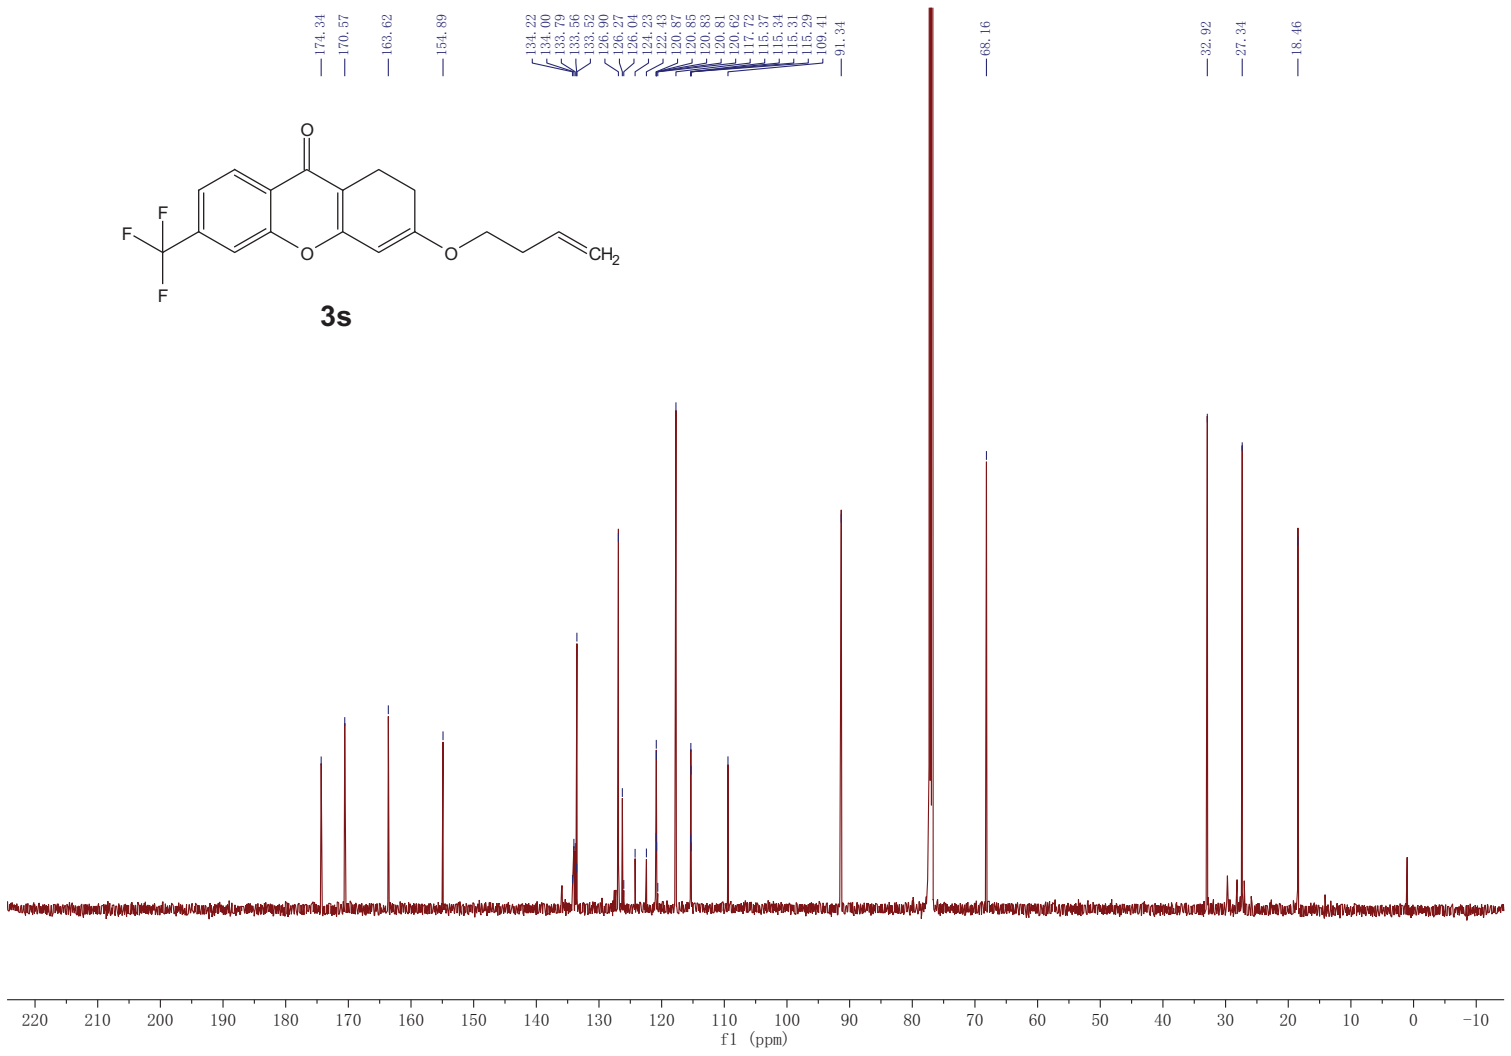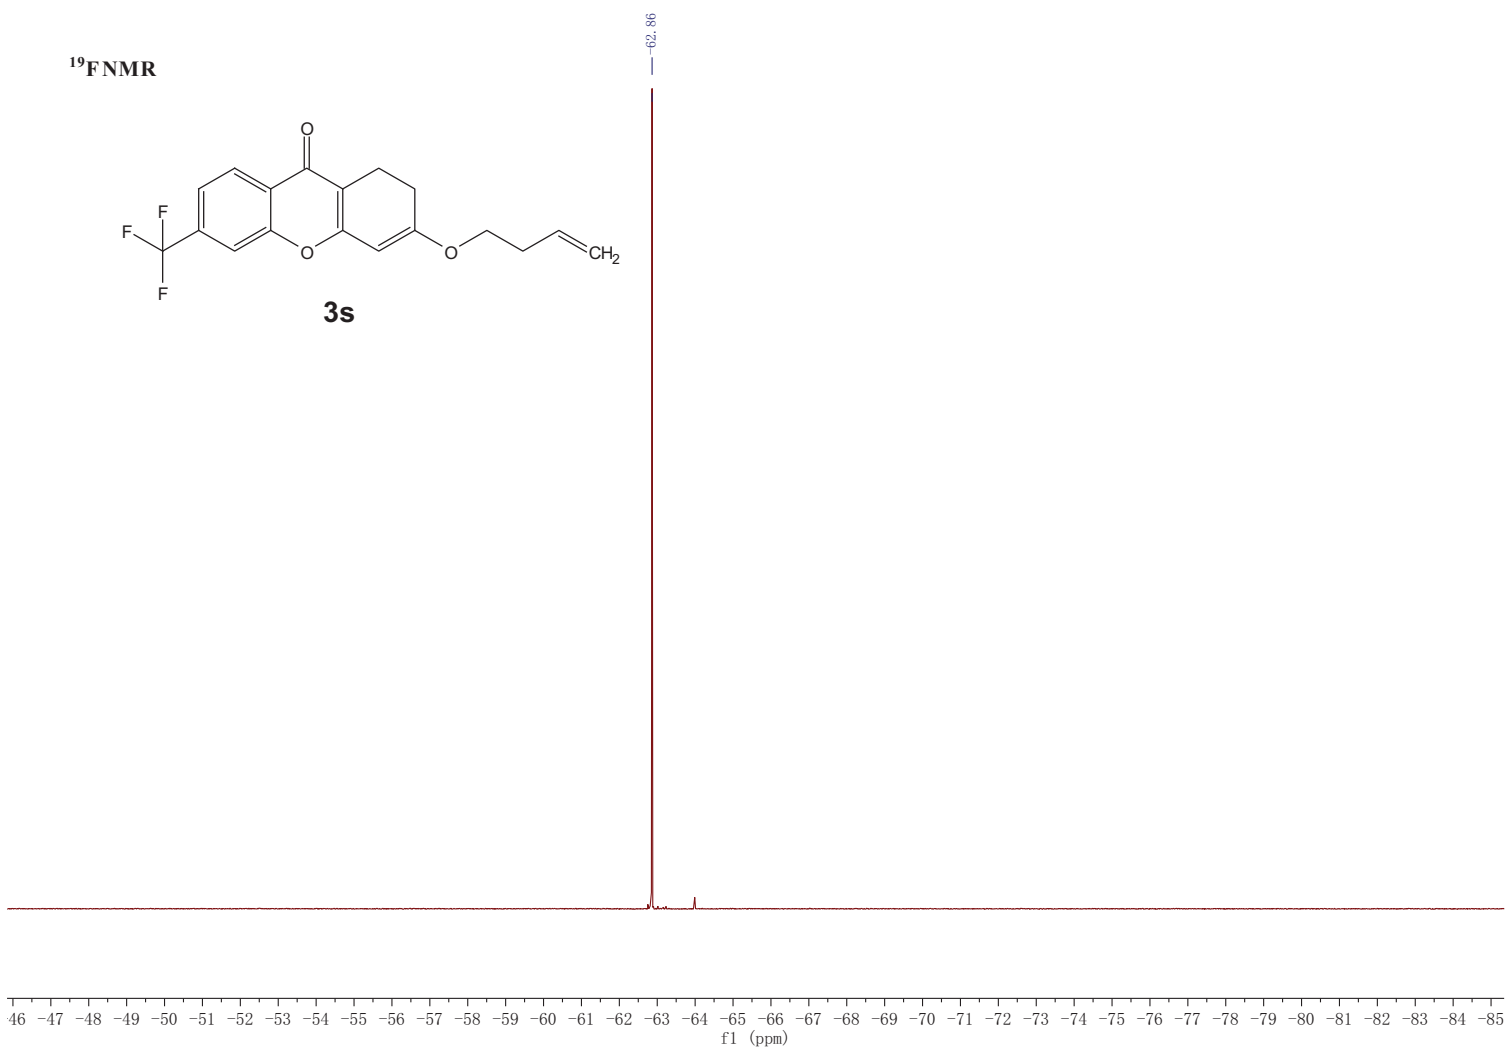

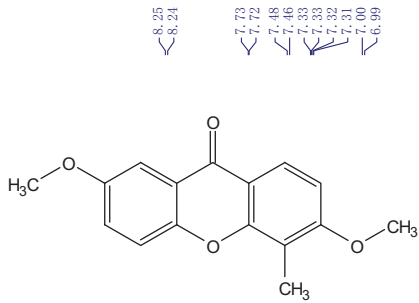

**3t**

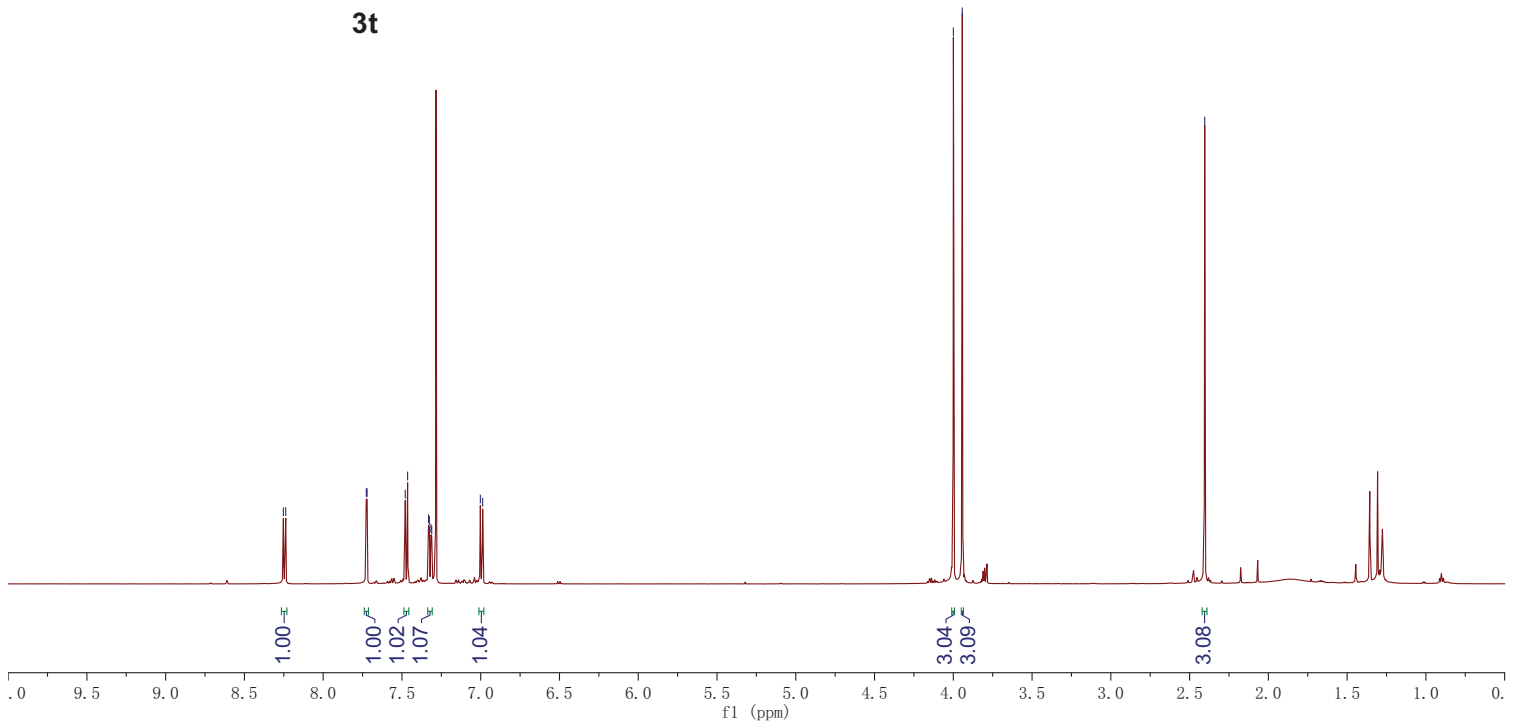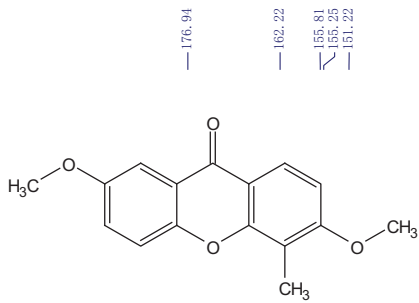

**3t**

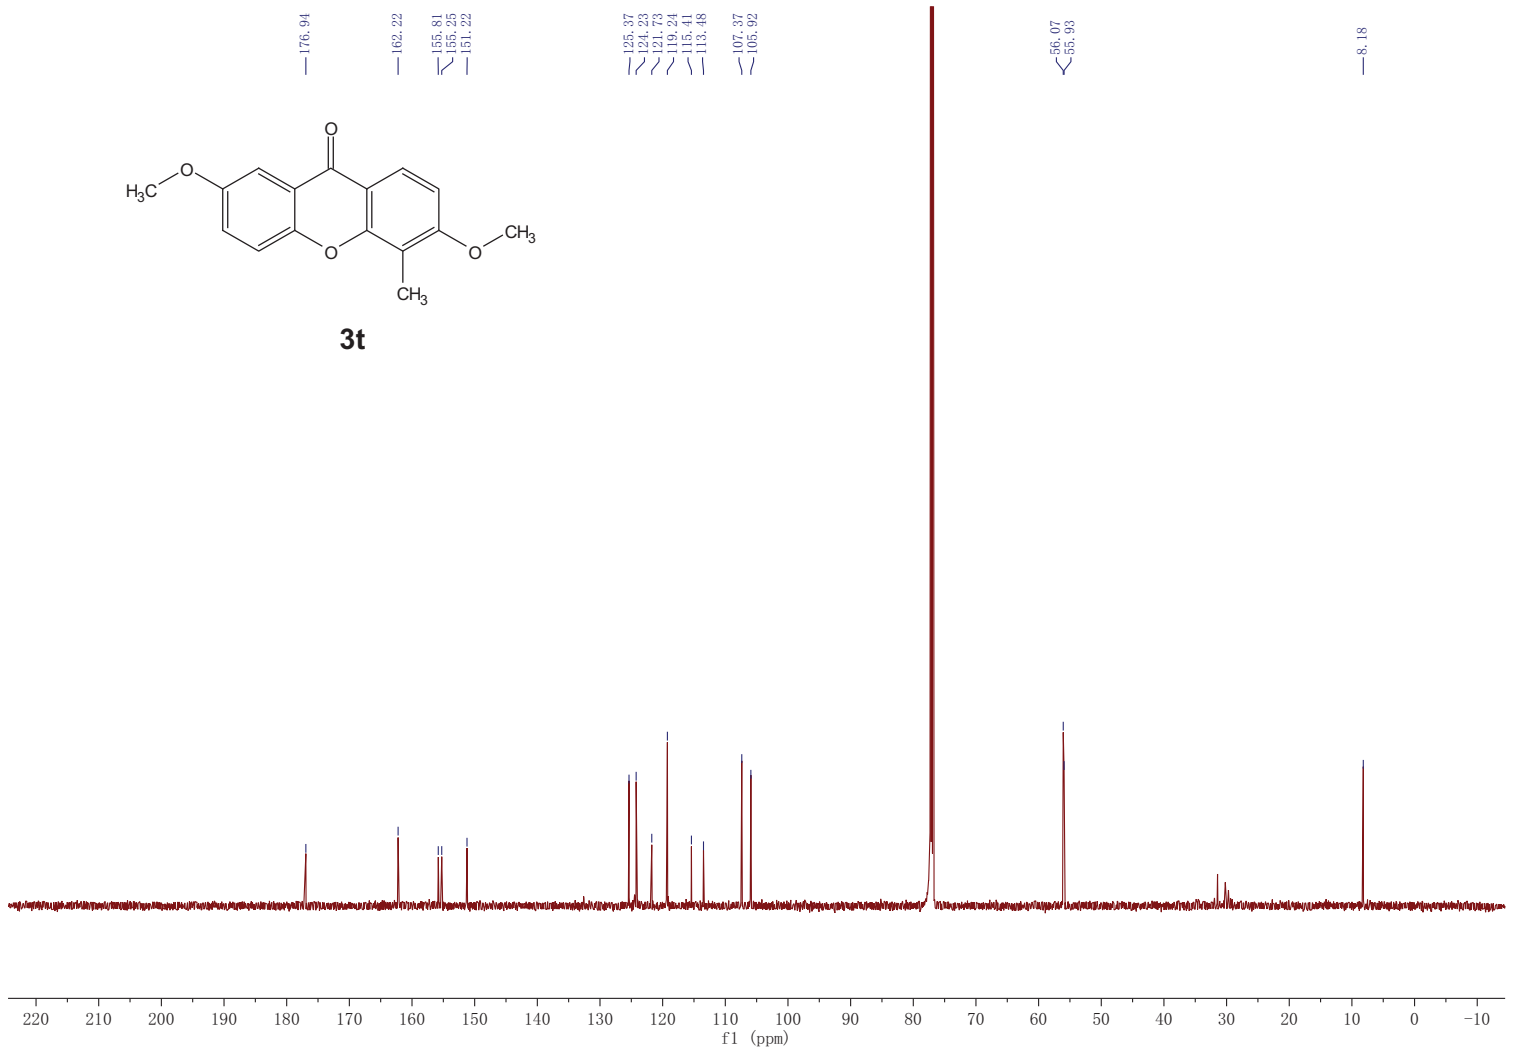

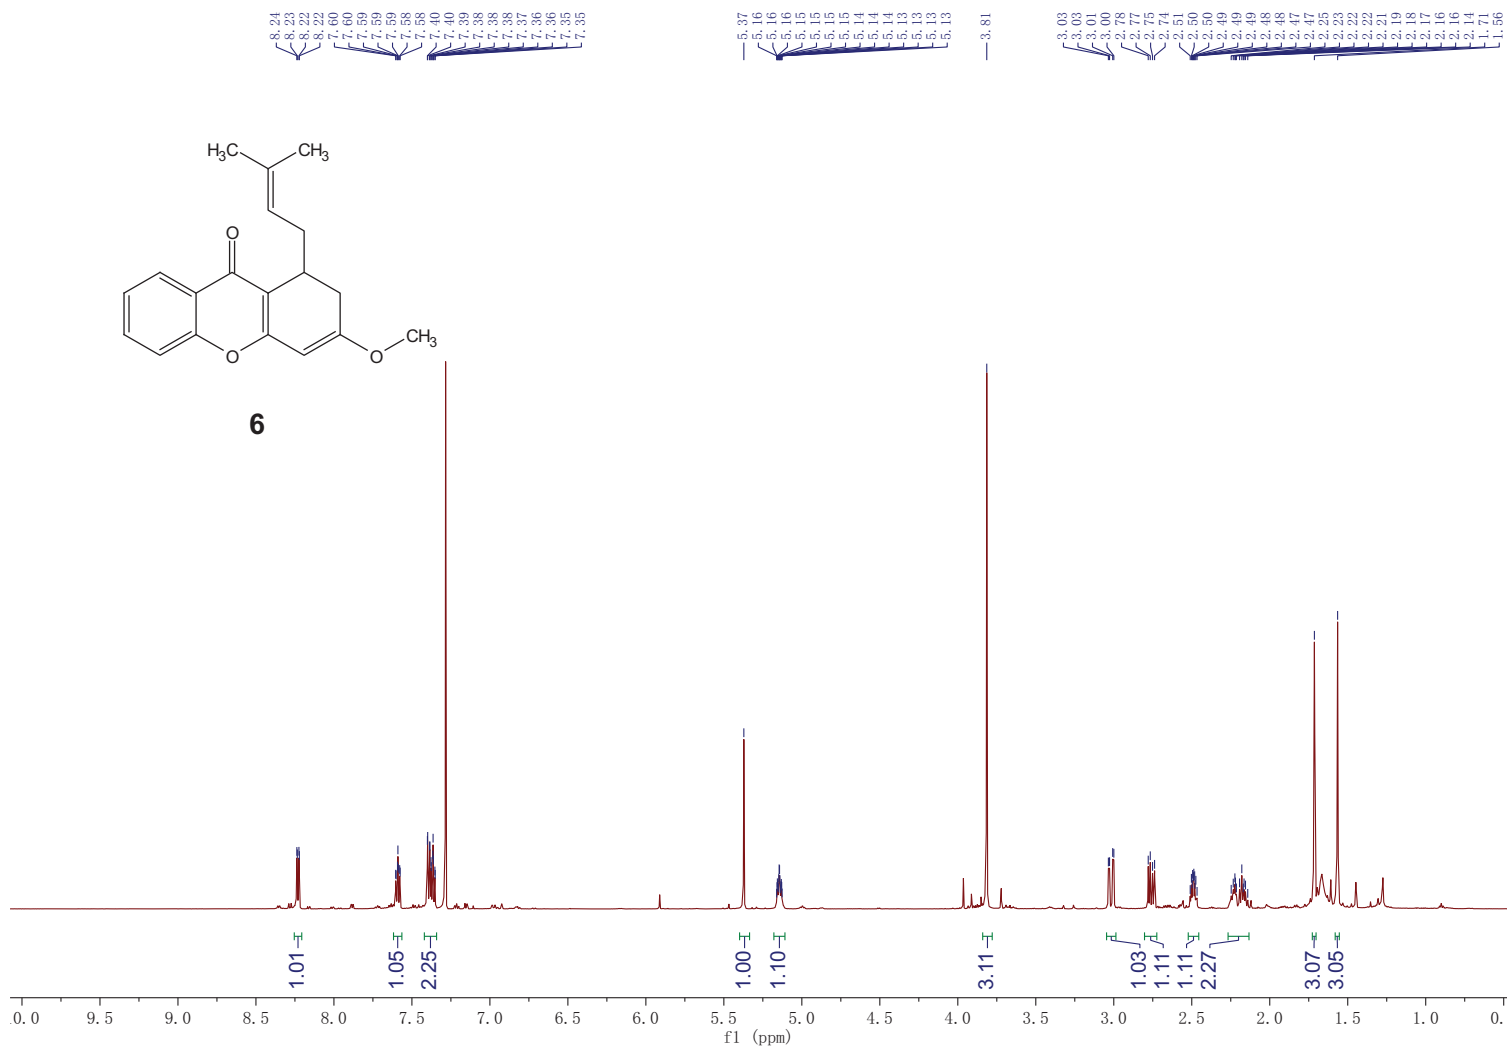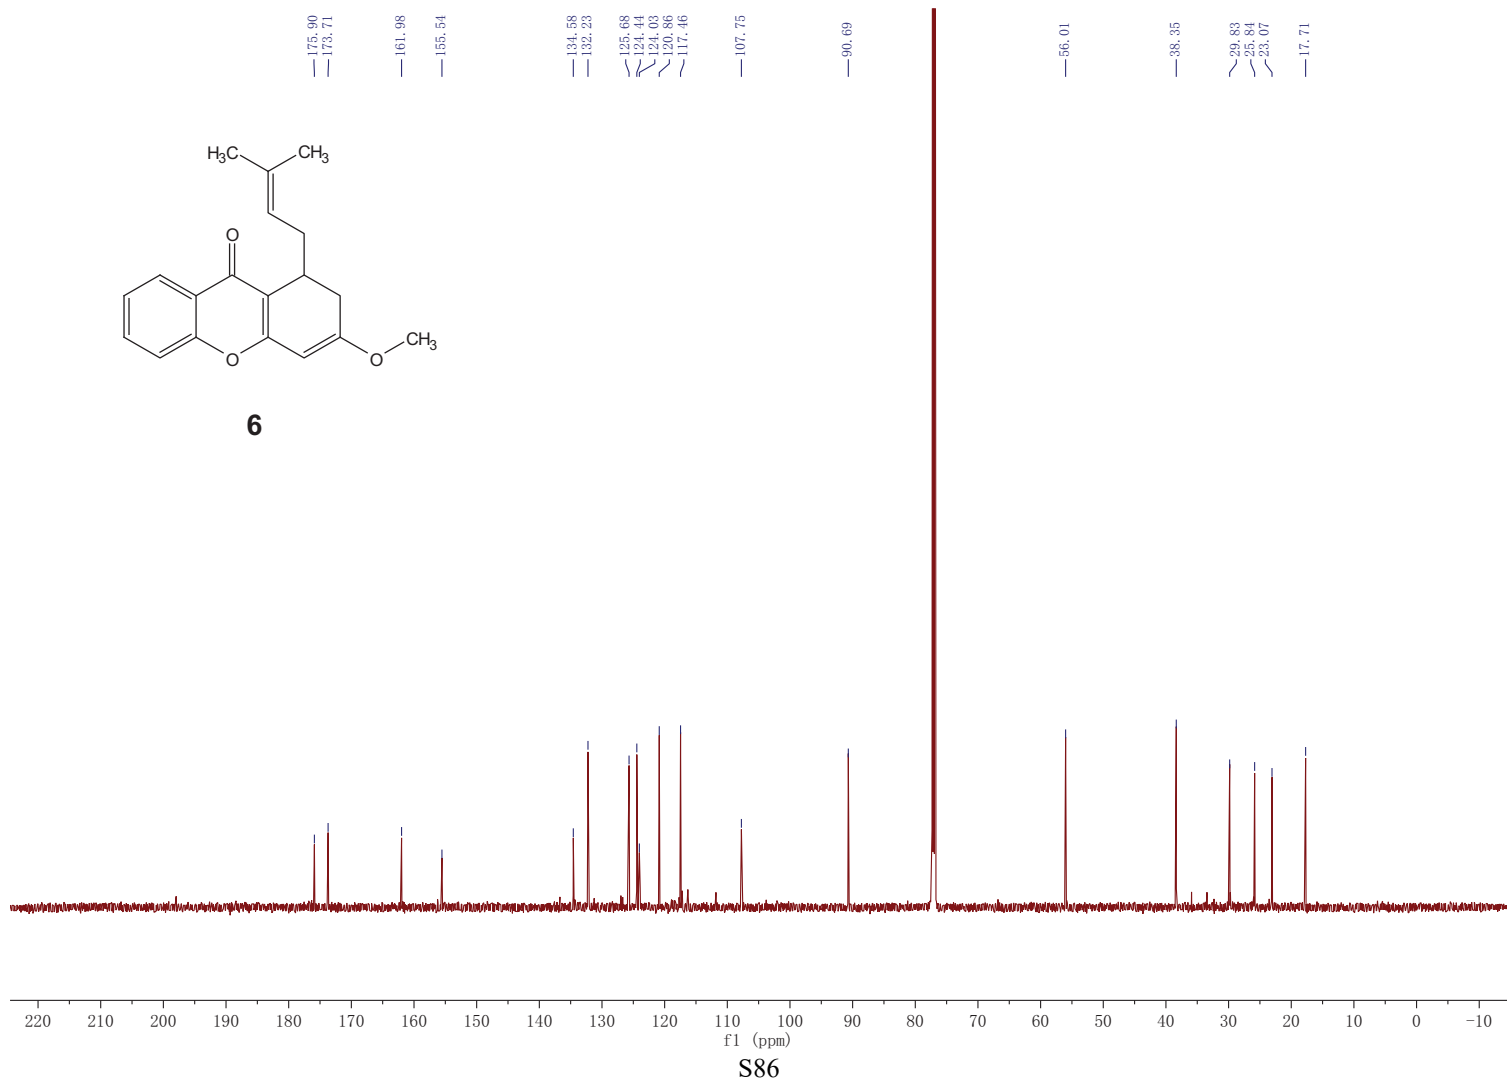

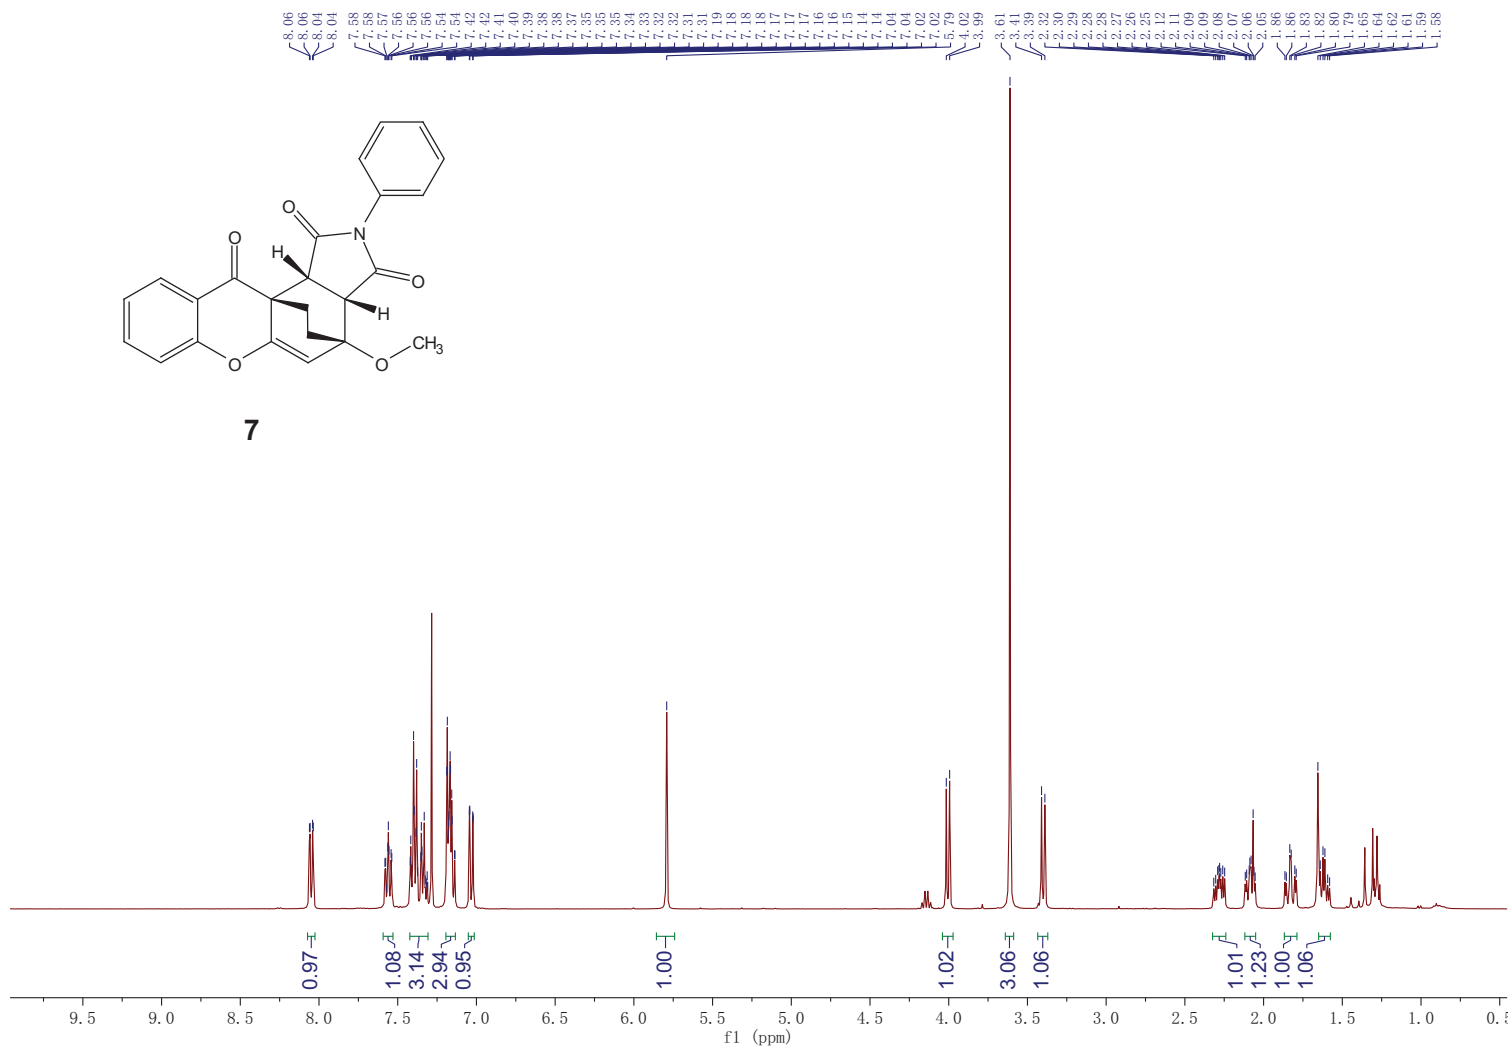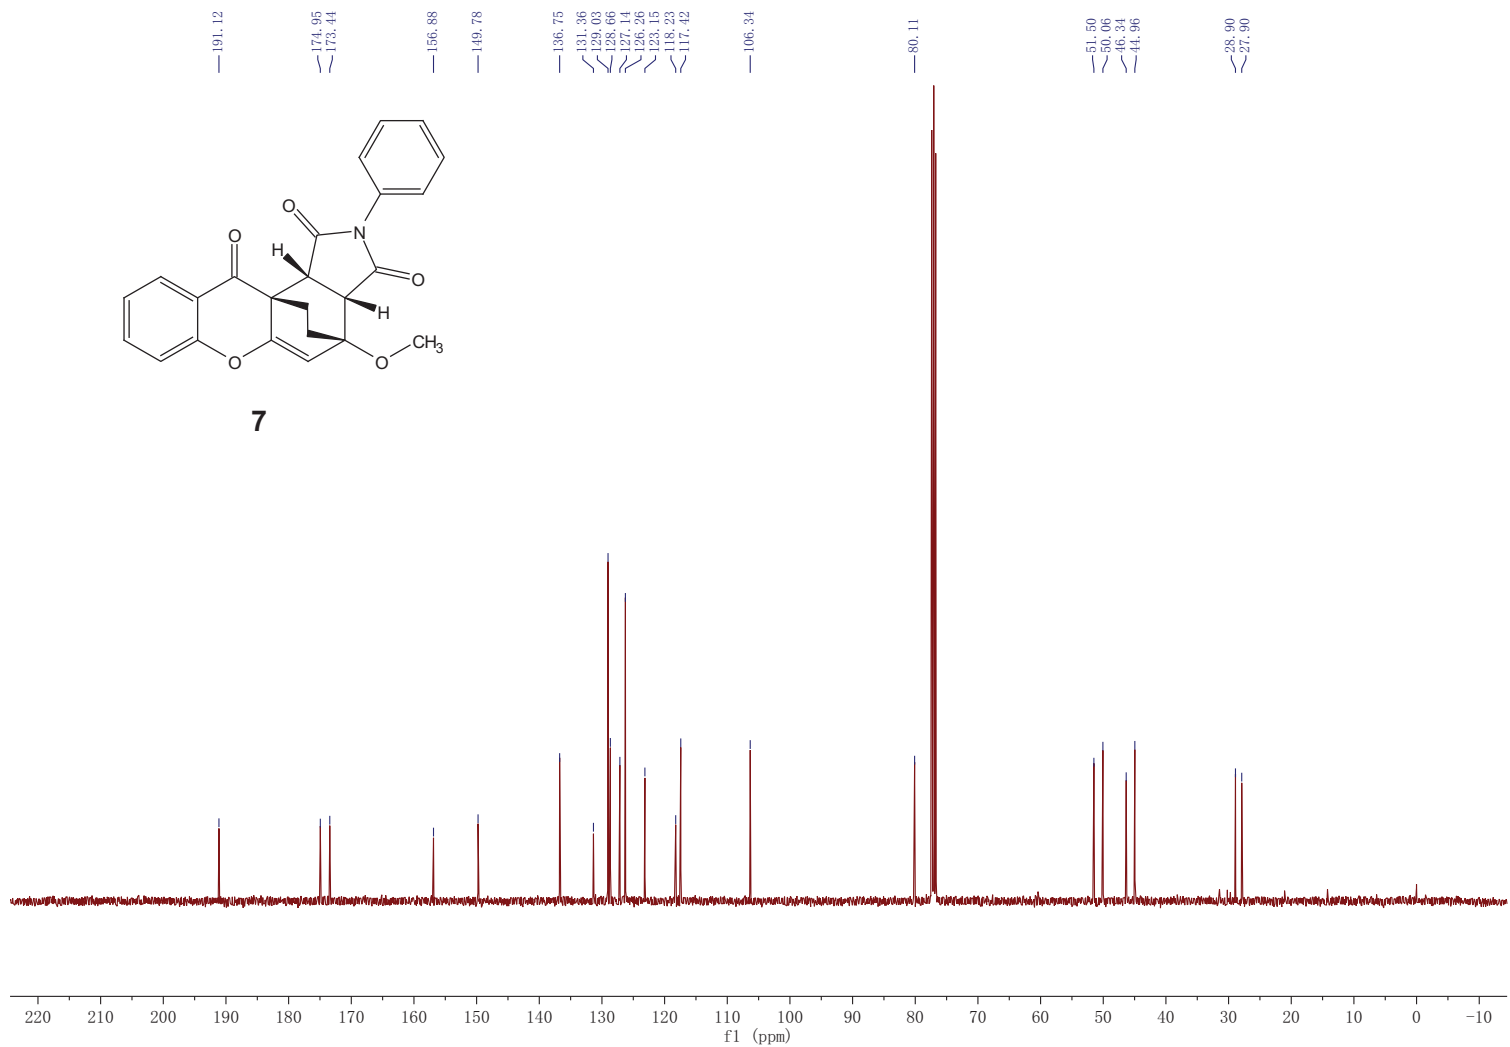

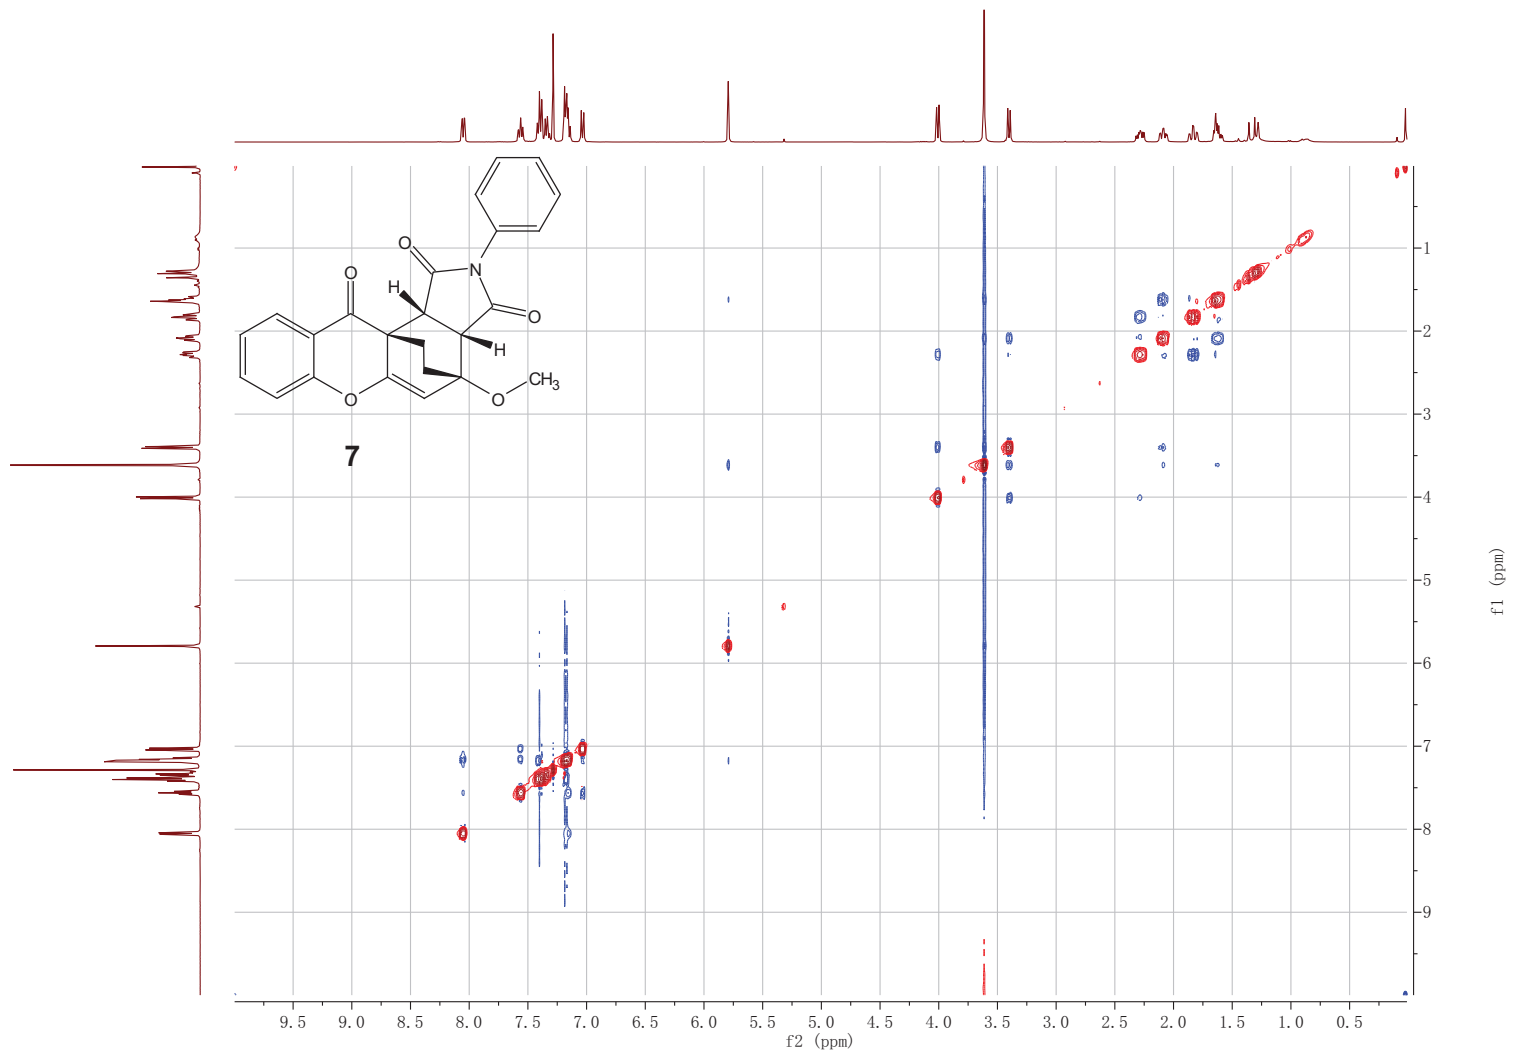

Supplement: d1ob00470k1.pdf [file d1ob00470k1.pdf]
